# Supplementary material for: A Careful Look at Binding Site Reorganization in the even-skipped Enhancers of Drosophila and Sepsids
Source: PubMed Central journal article supplement (PMC2582681; doi:10.1371/journal.pgen.1000268), 2008-11-28

st2\_dmel\_dpse\_blastplot\_9\_rev\_normed

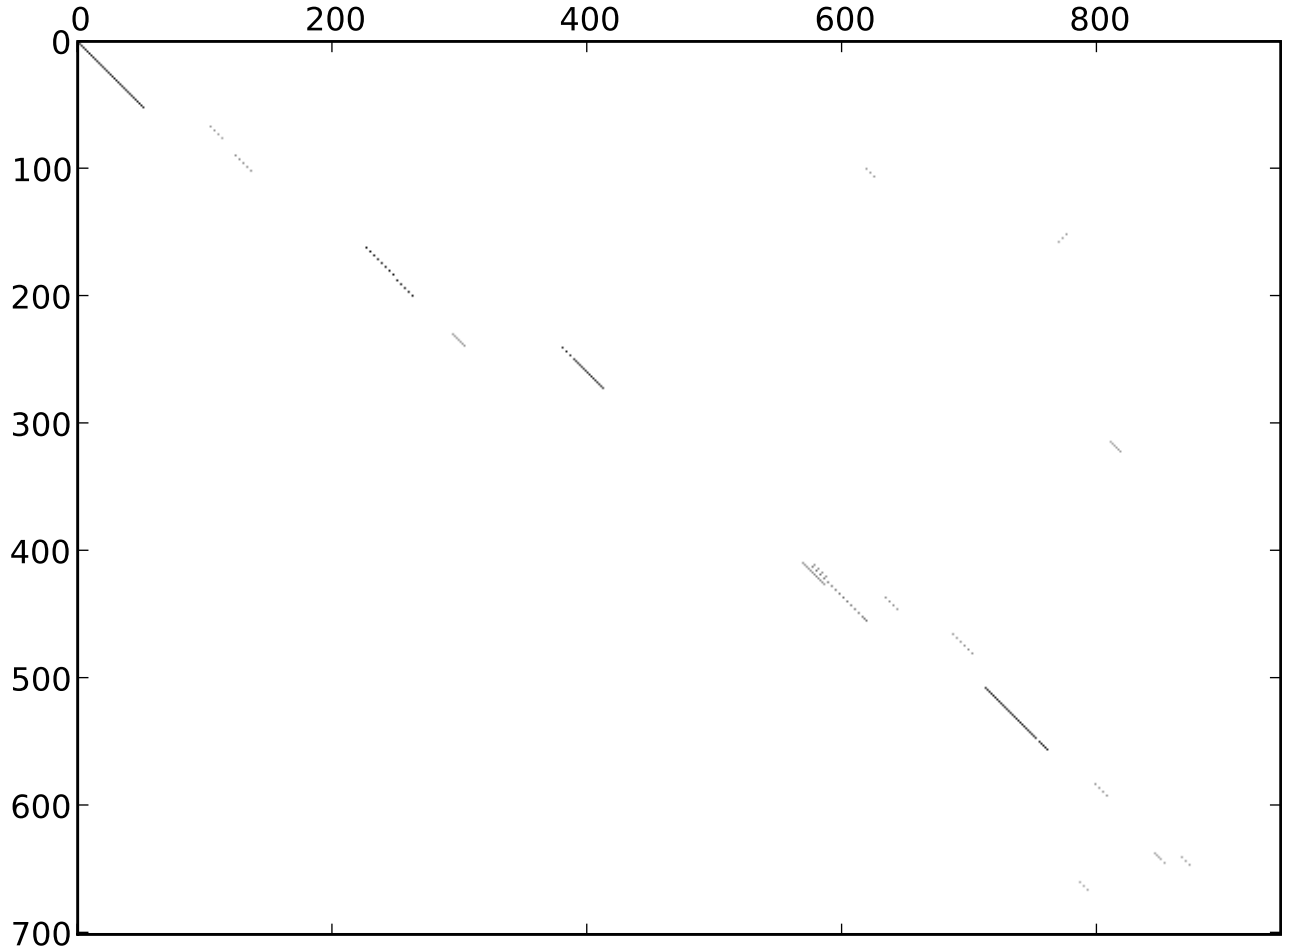

st2\_dmel\_dvir\_blastplot\_9\_rev\_normed

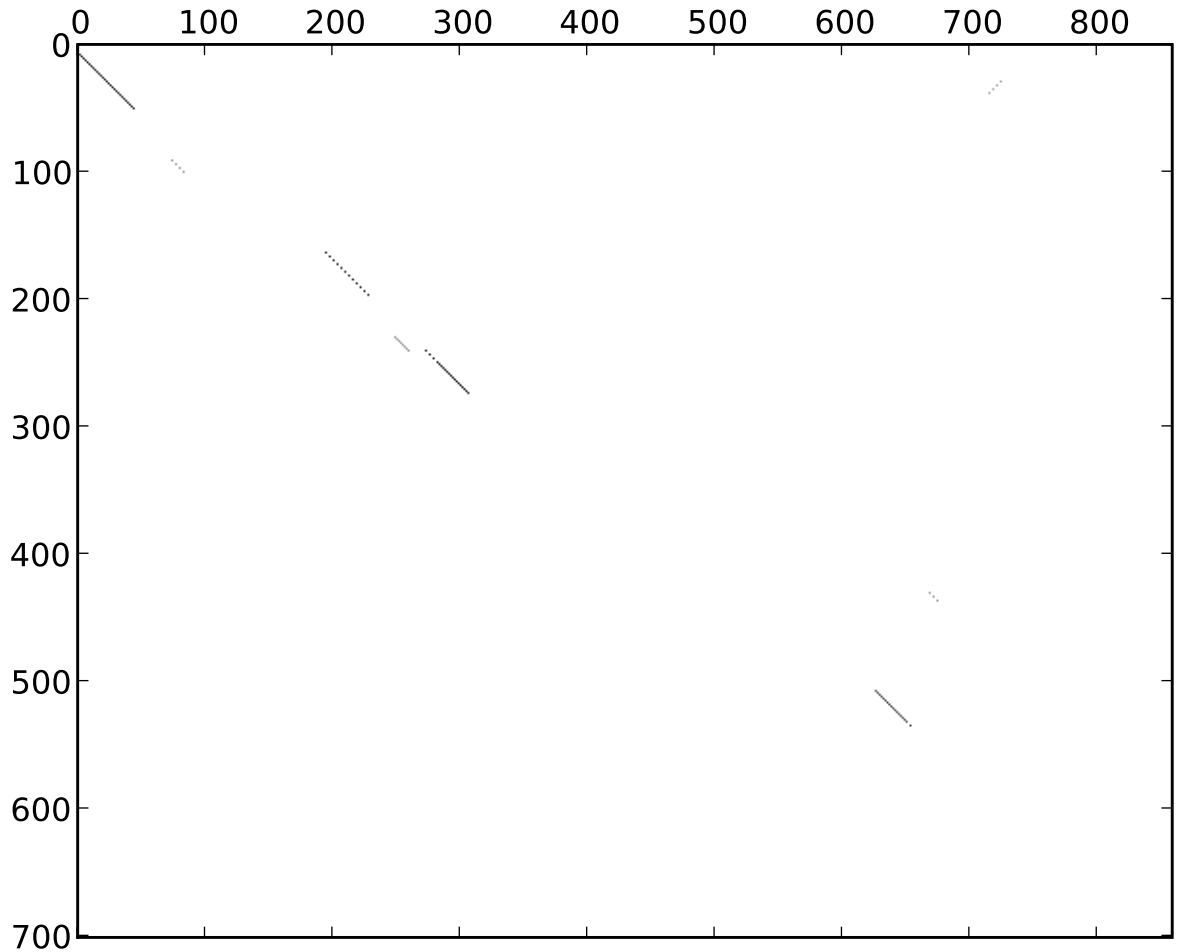

st2\_dmel\_sepsis\_cynipsea\_blastplot\_9\_rev\_normed

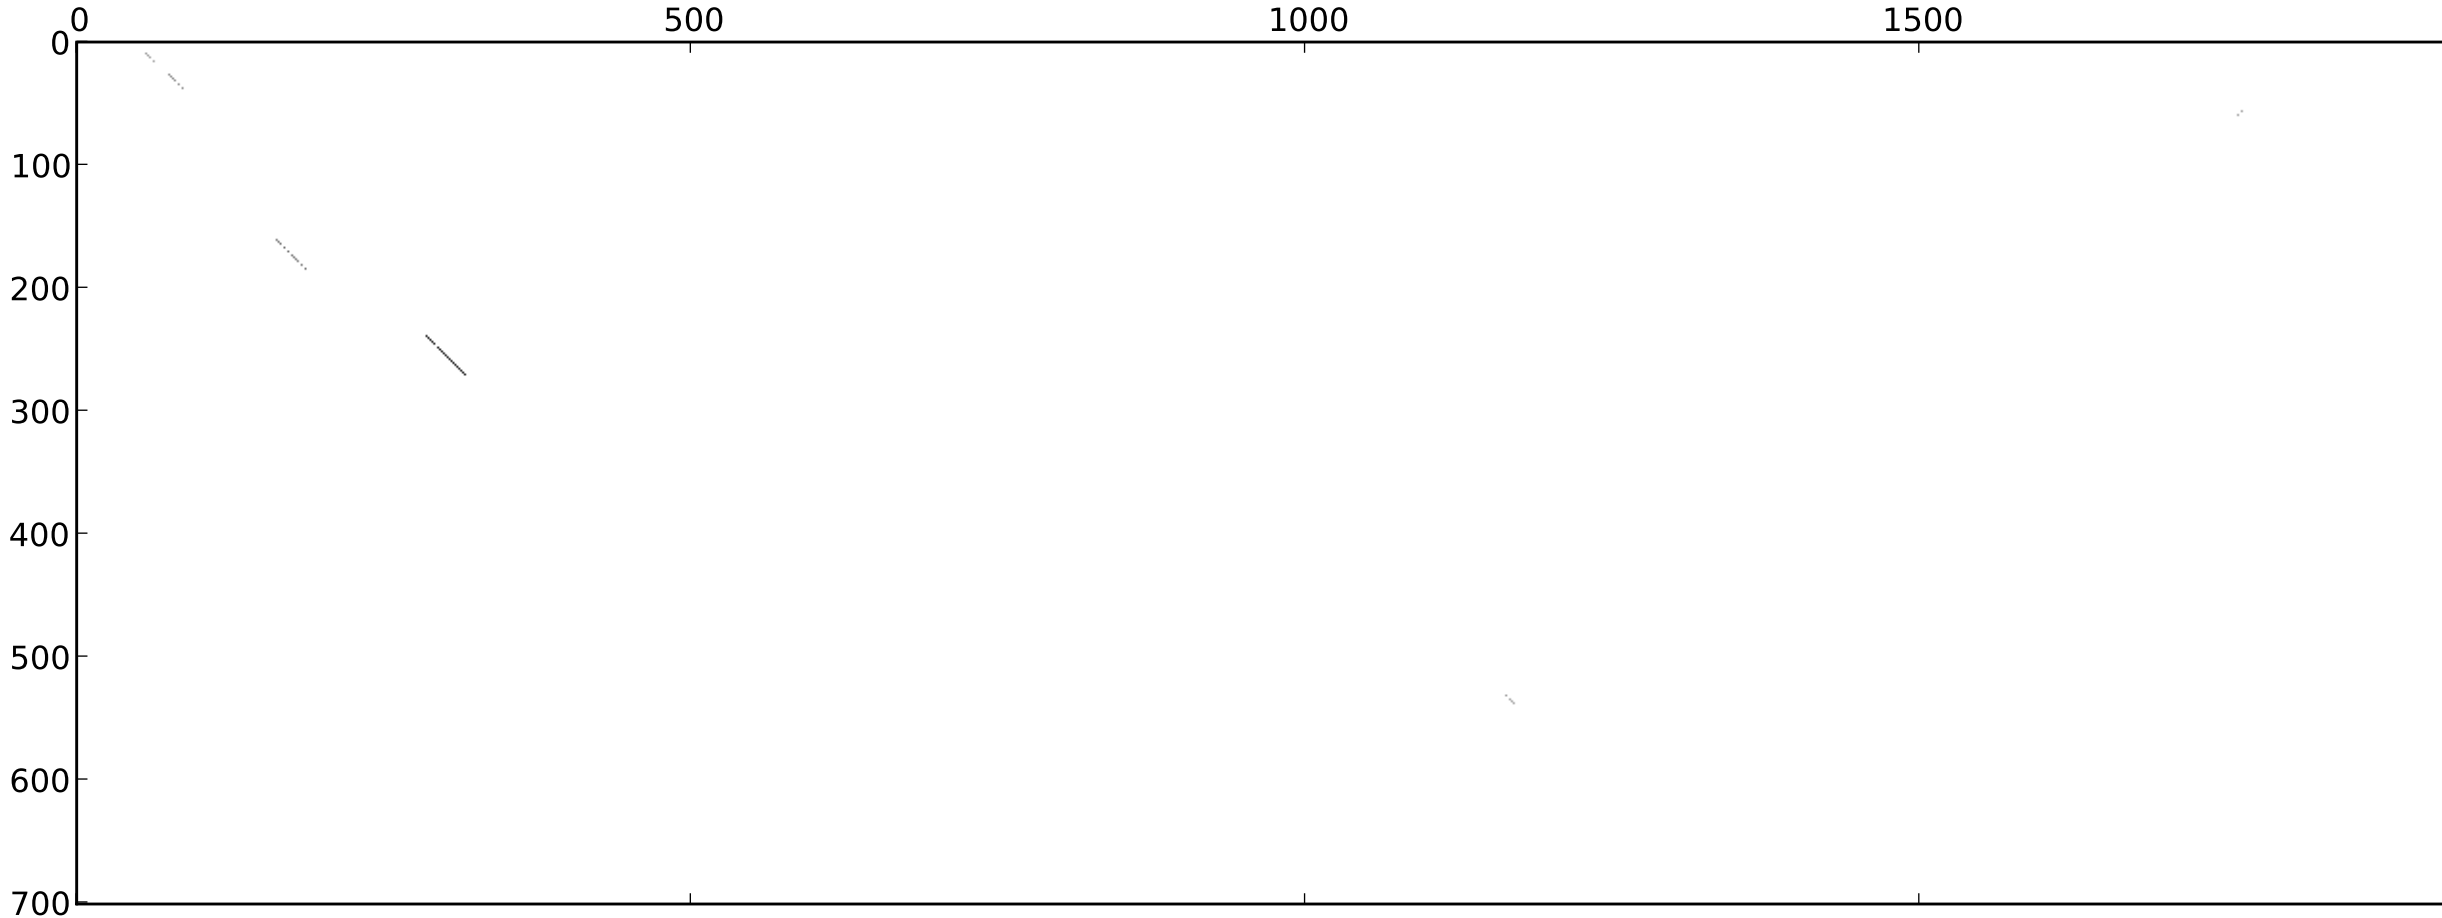

st2\_dmel\_themira\_putris\_blastplot\_9\_rev\_normed

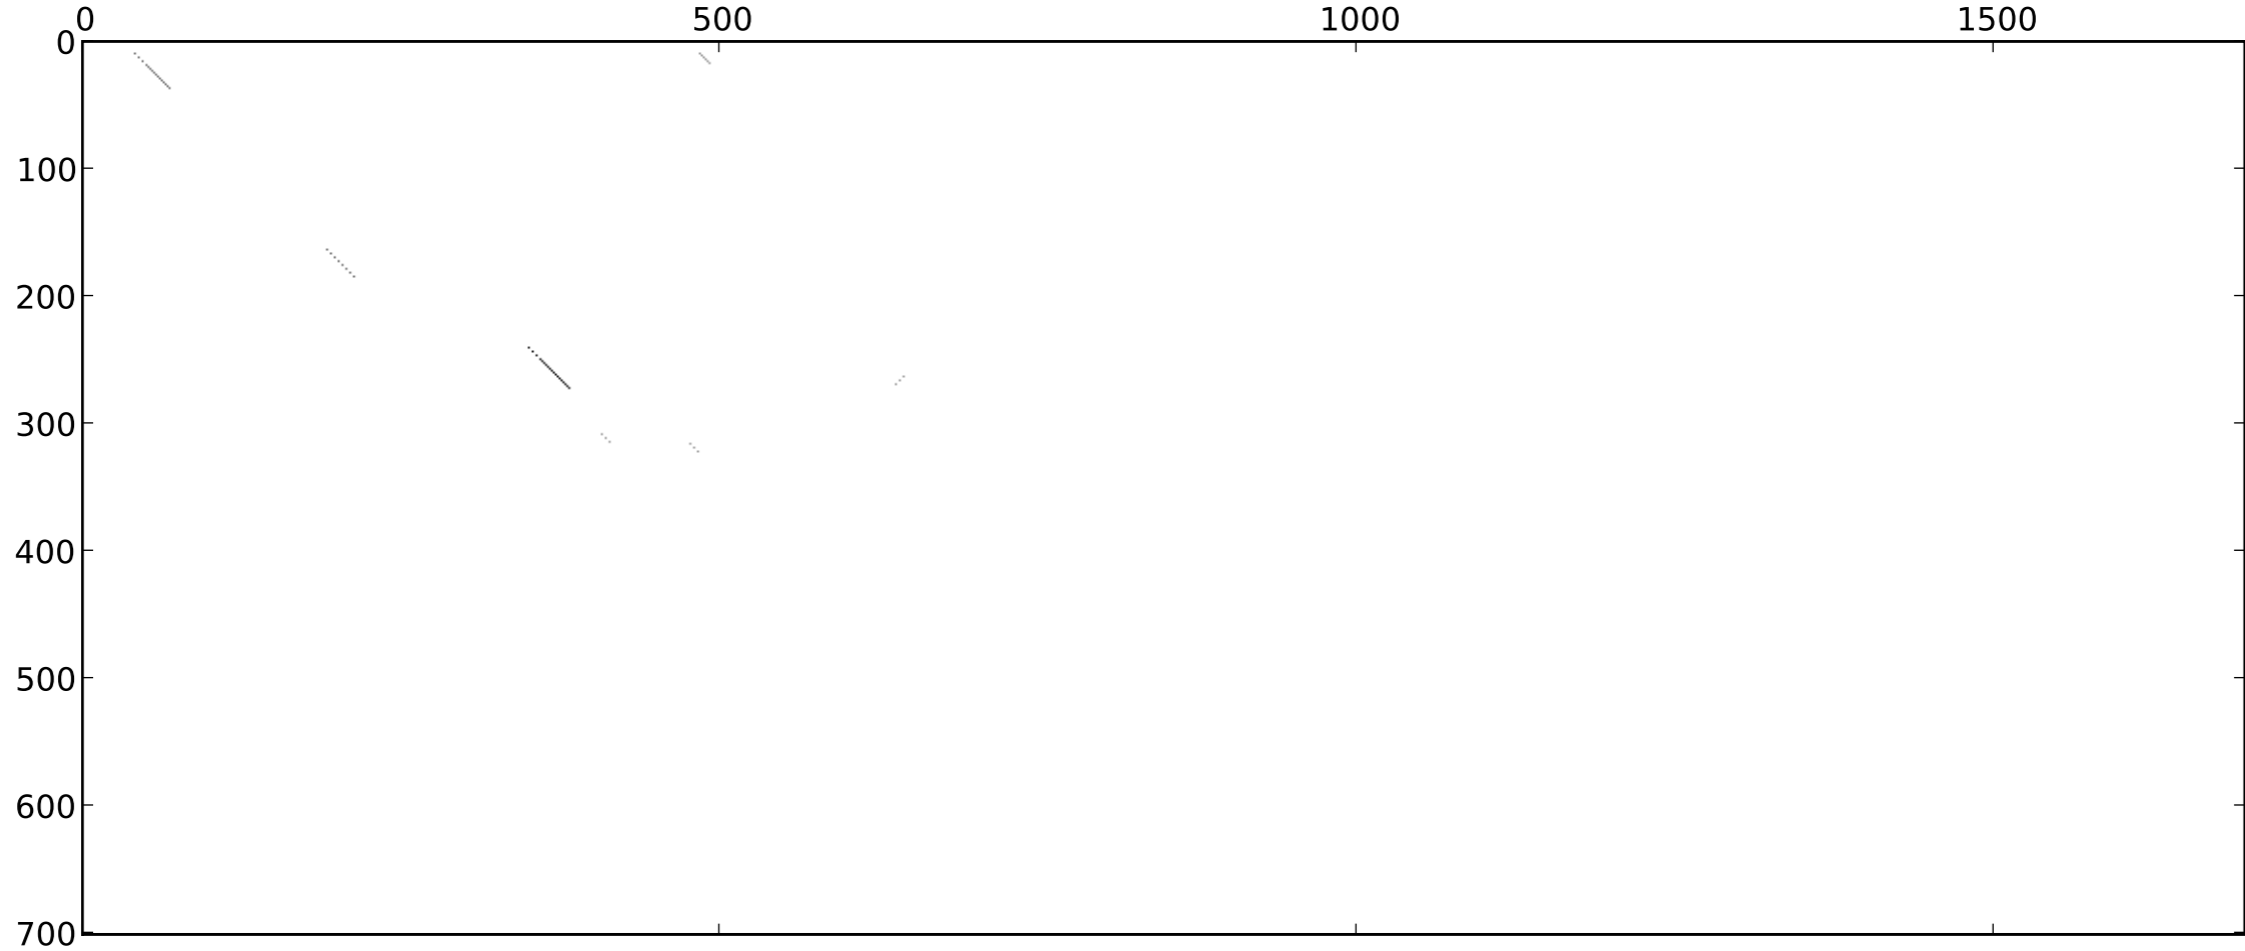

st37\_dmel\_dpse\_blastplot\_9\_rev\_normed

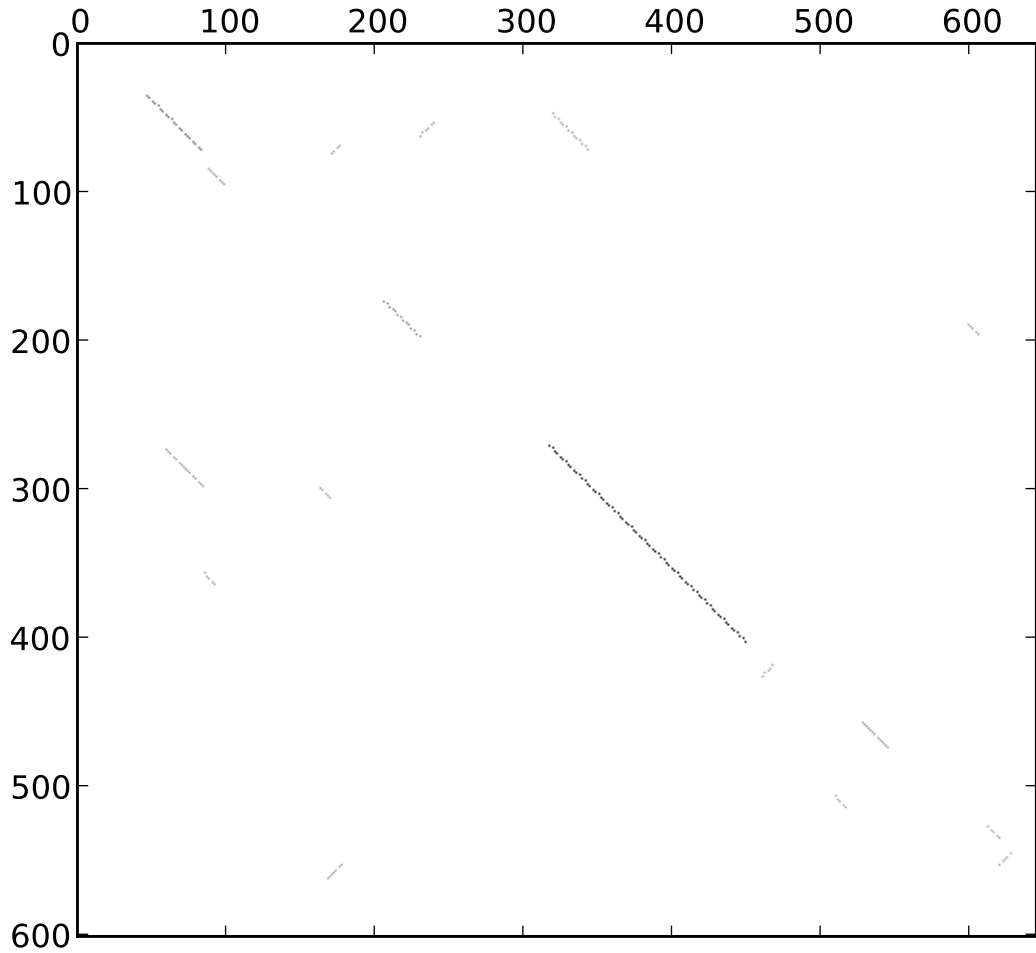

st37\_dmel\_dvir\_blastplot\_9\_rev\_normed

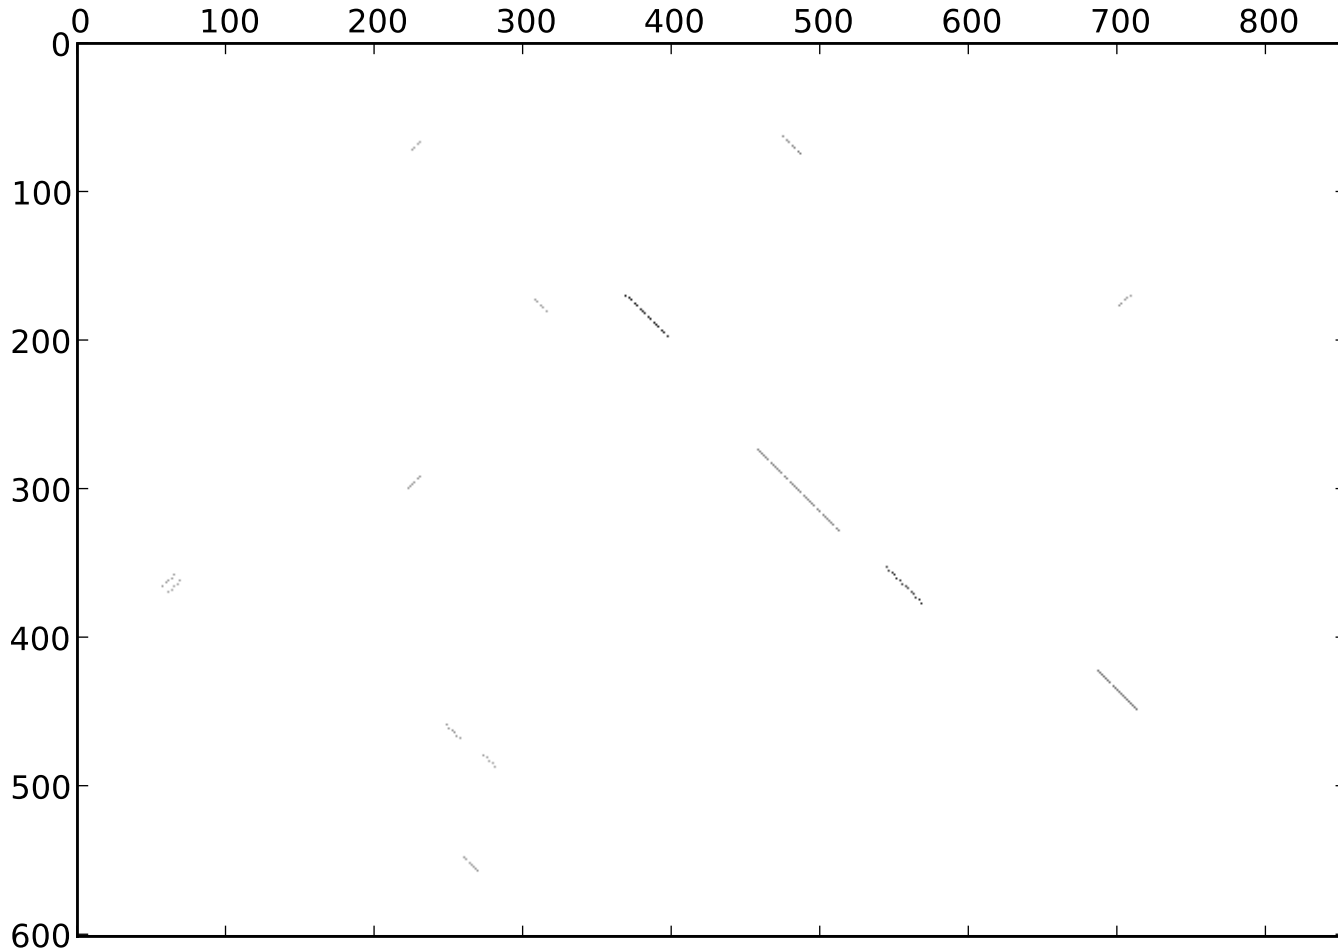

st37\_dmel\_sepsis\_cynipsea\_blastplot\_9\_rev\_normed

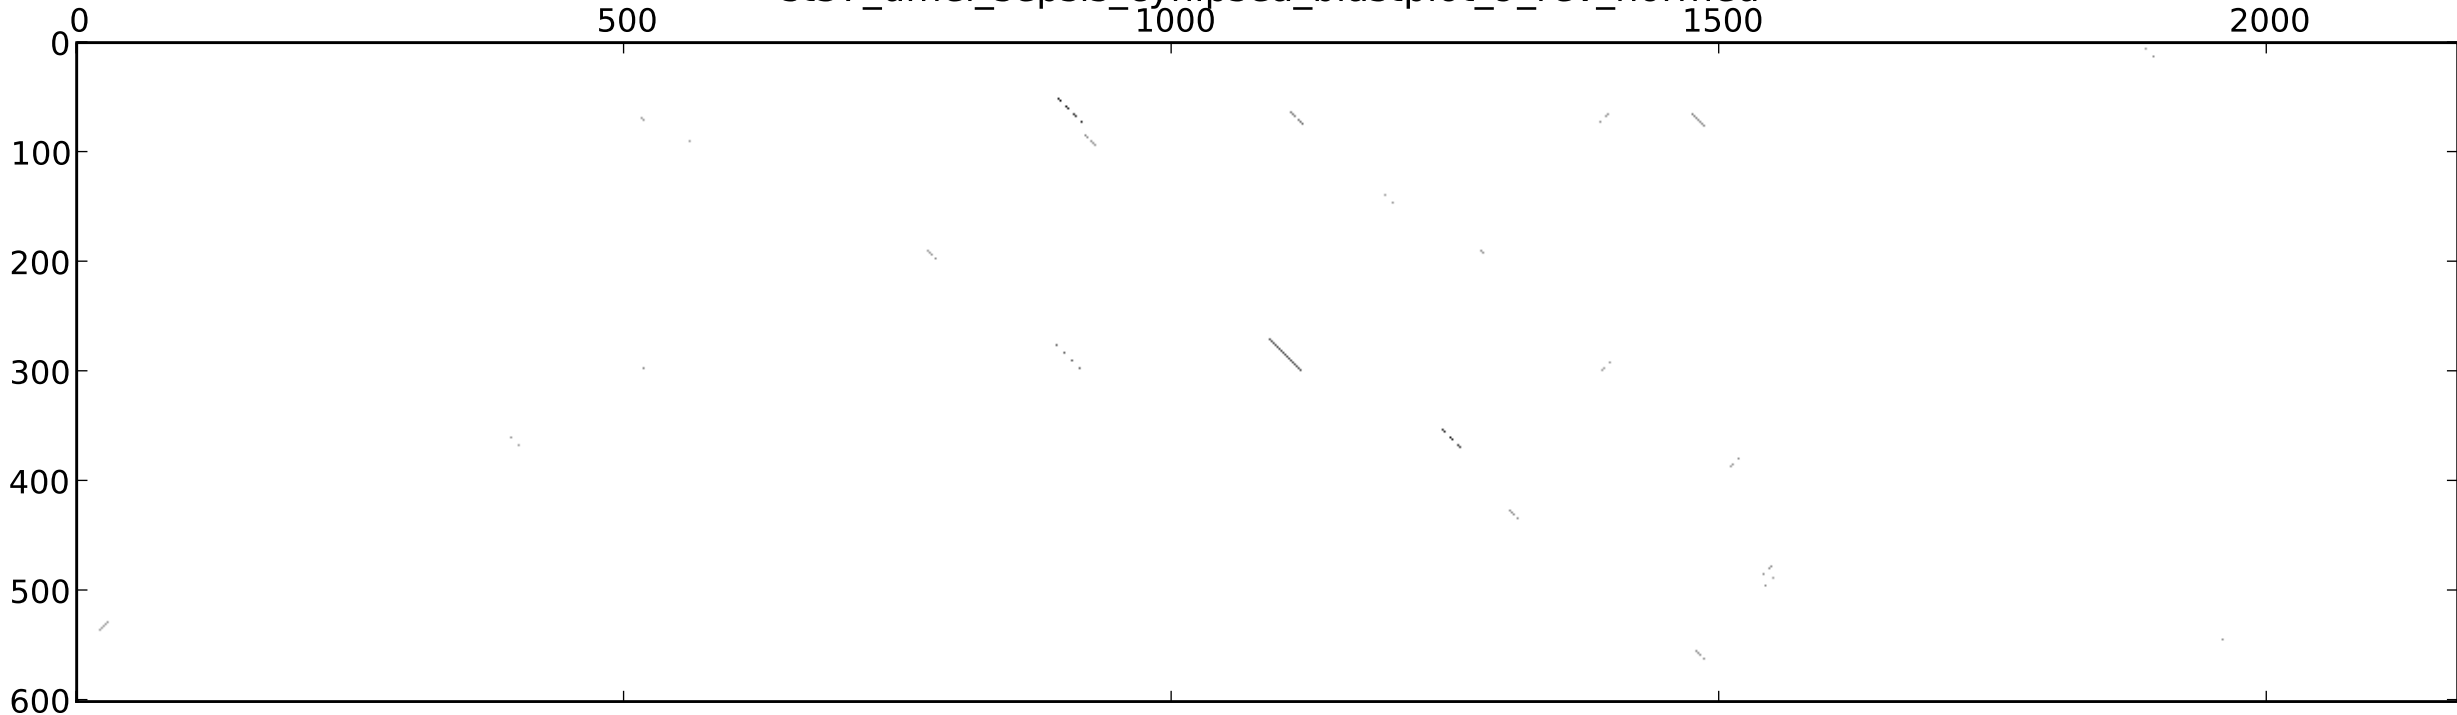

st37\_dmel\_themira\_putris\_blastplot\_9\_rev\_normed

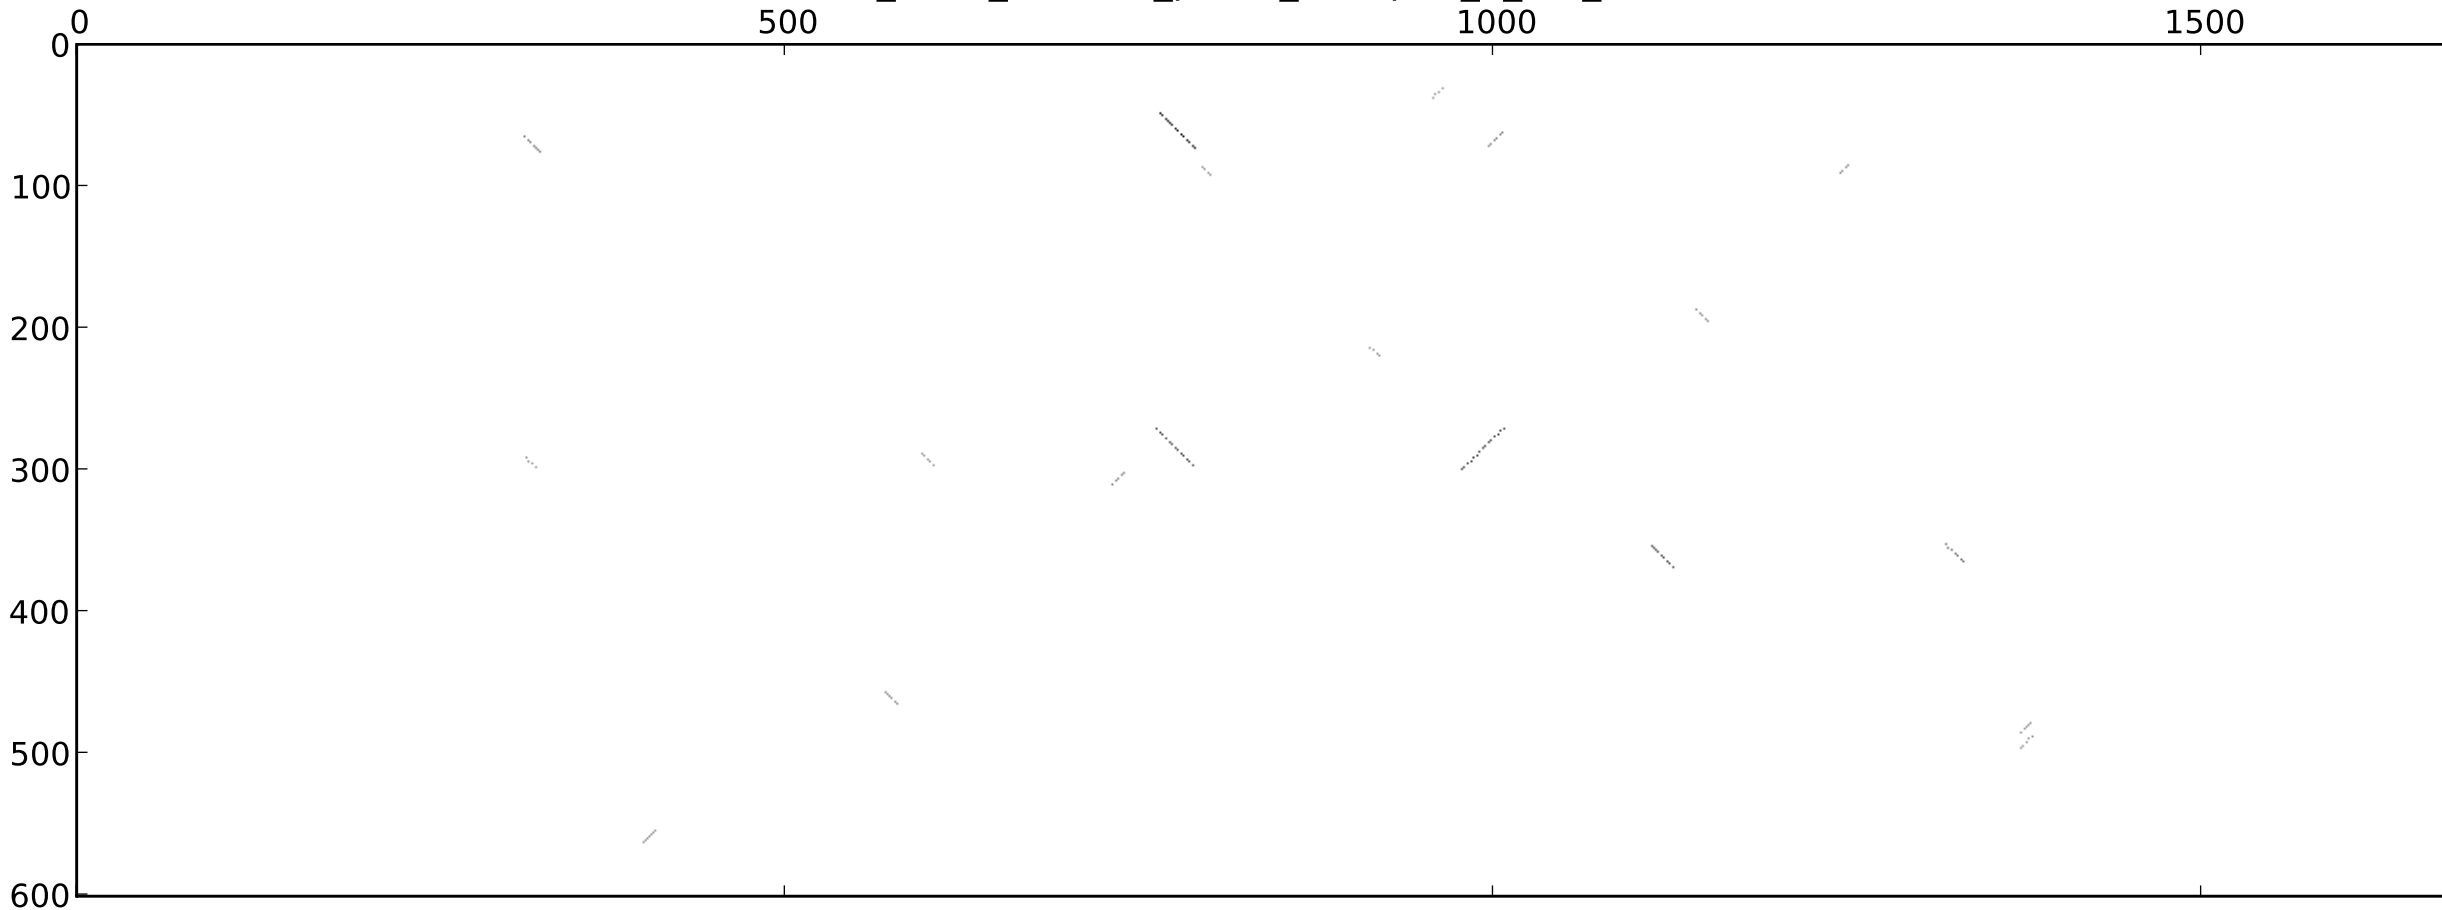



st46\_dmel\_dpse\_blastplot\_9\_rev\_normed

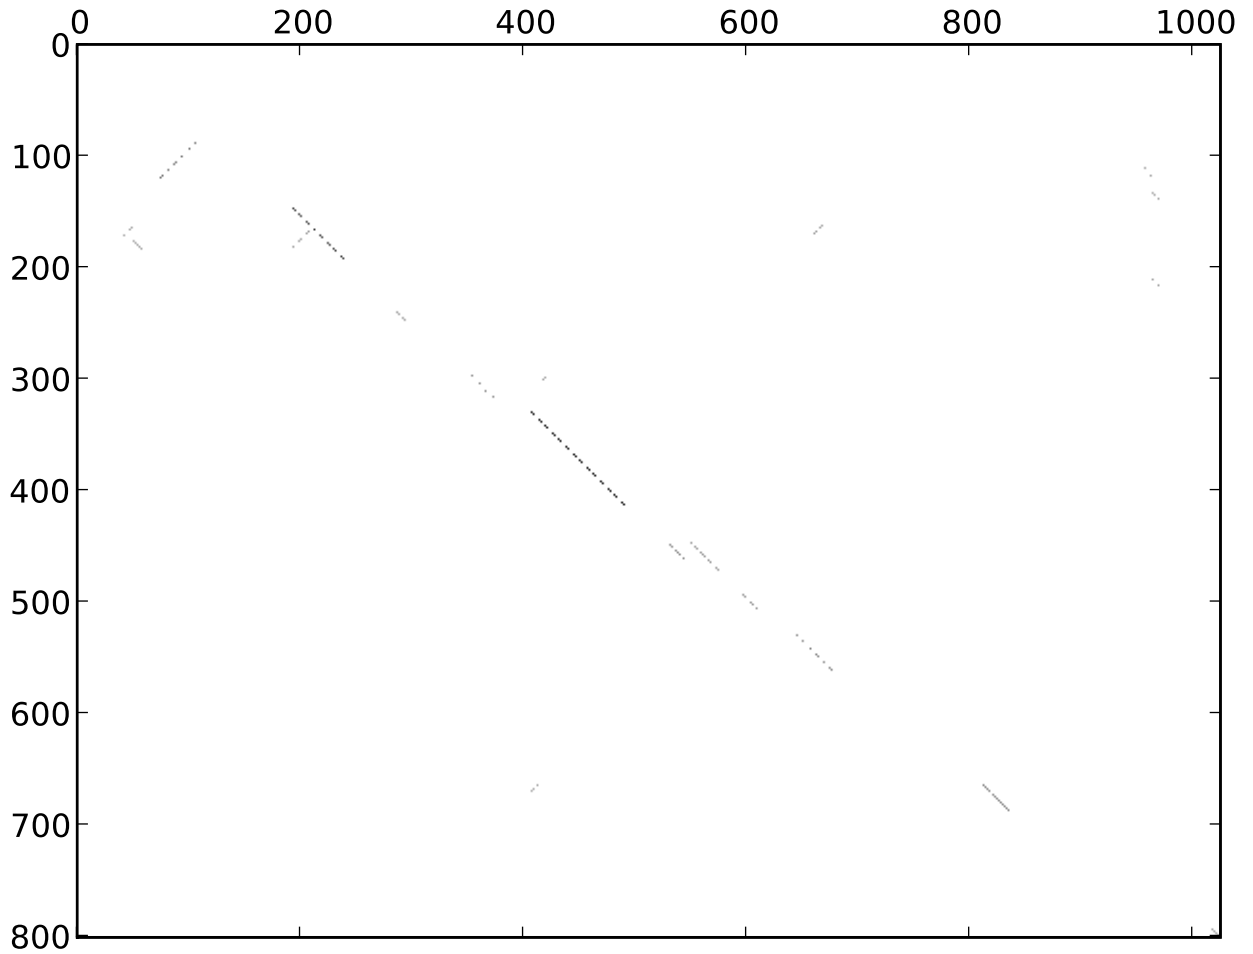

st46\_dmel\_dvir\_blastplot\_9\_rev\_normed

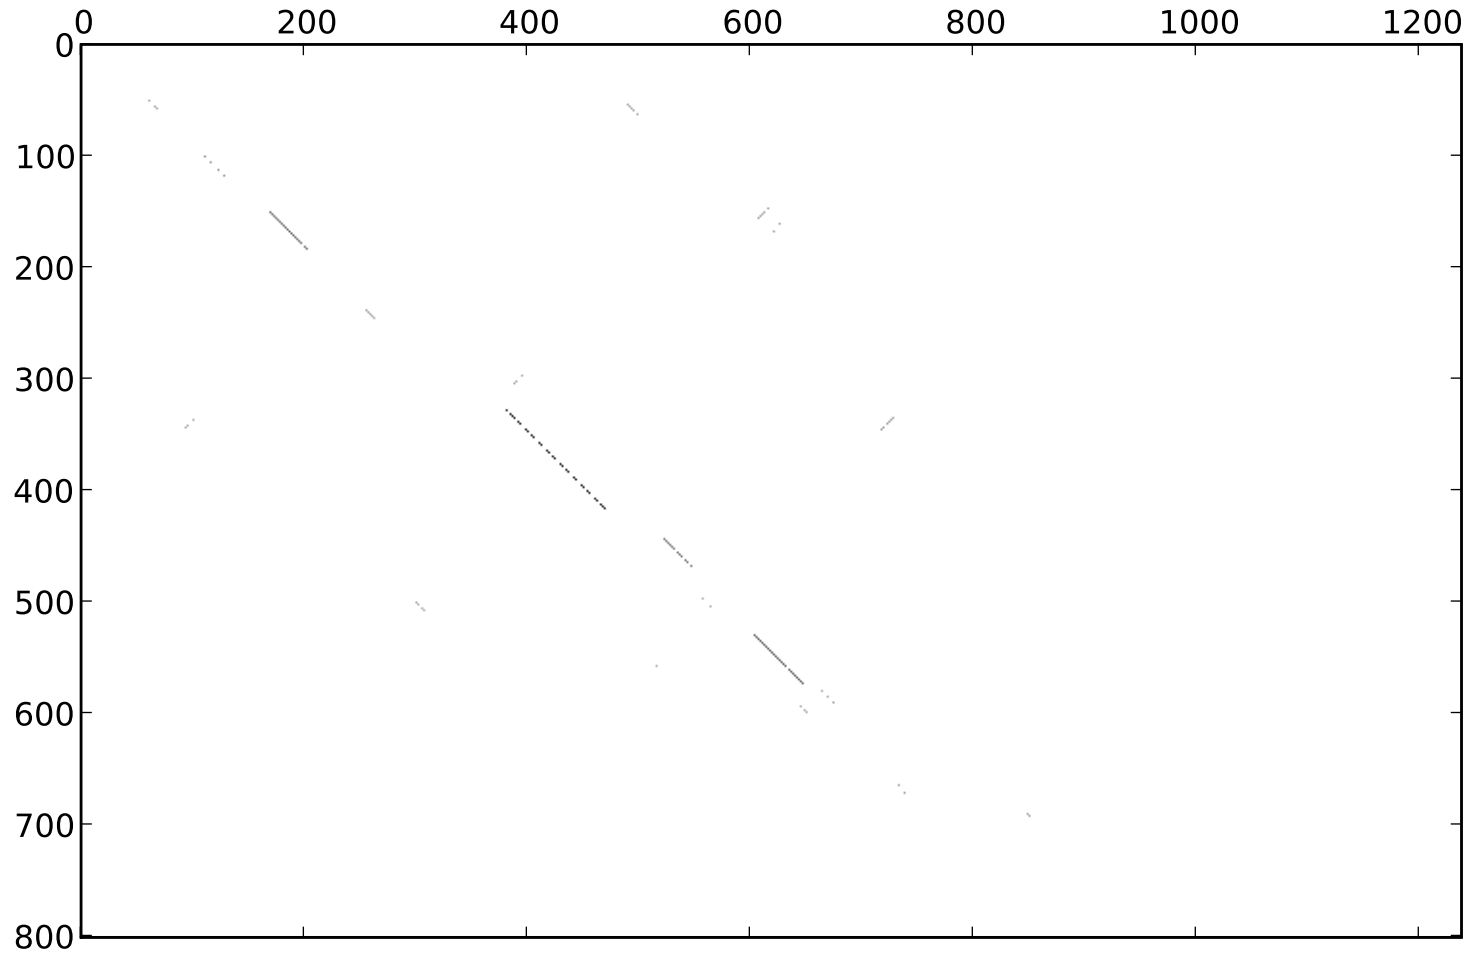

st46\_dmel\_sepsis\_cynipsea\_blastplot\_9\_rev\_normed

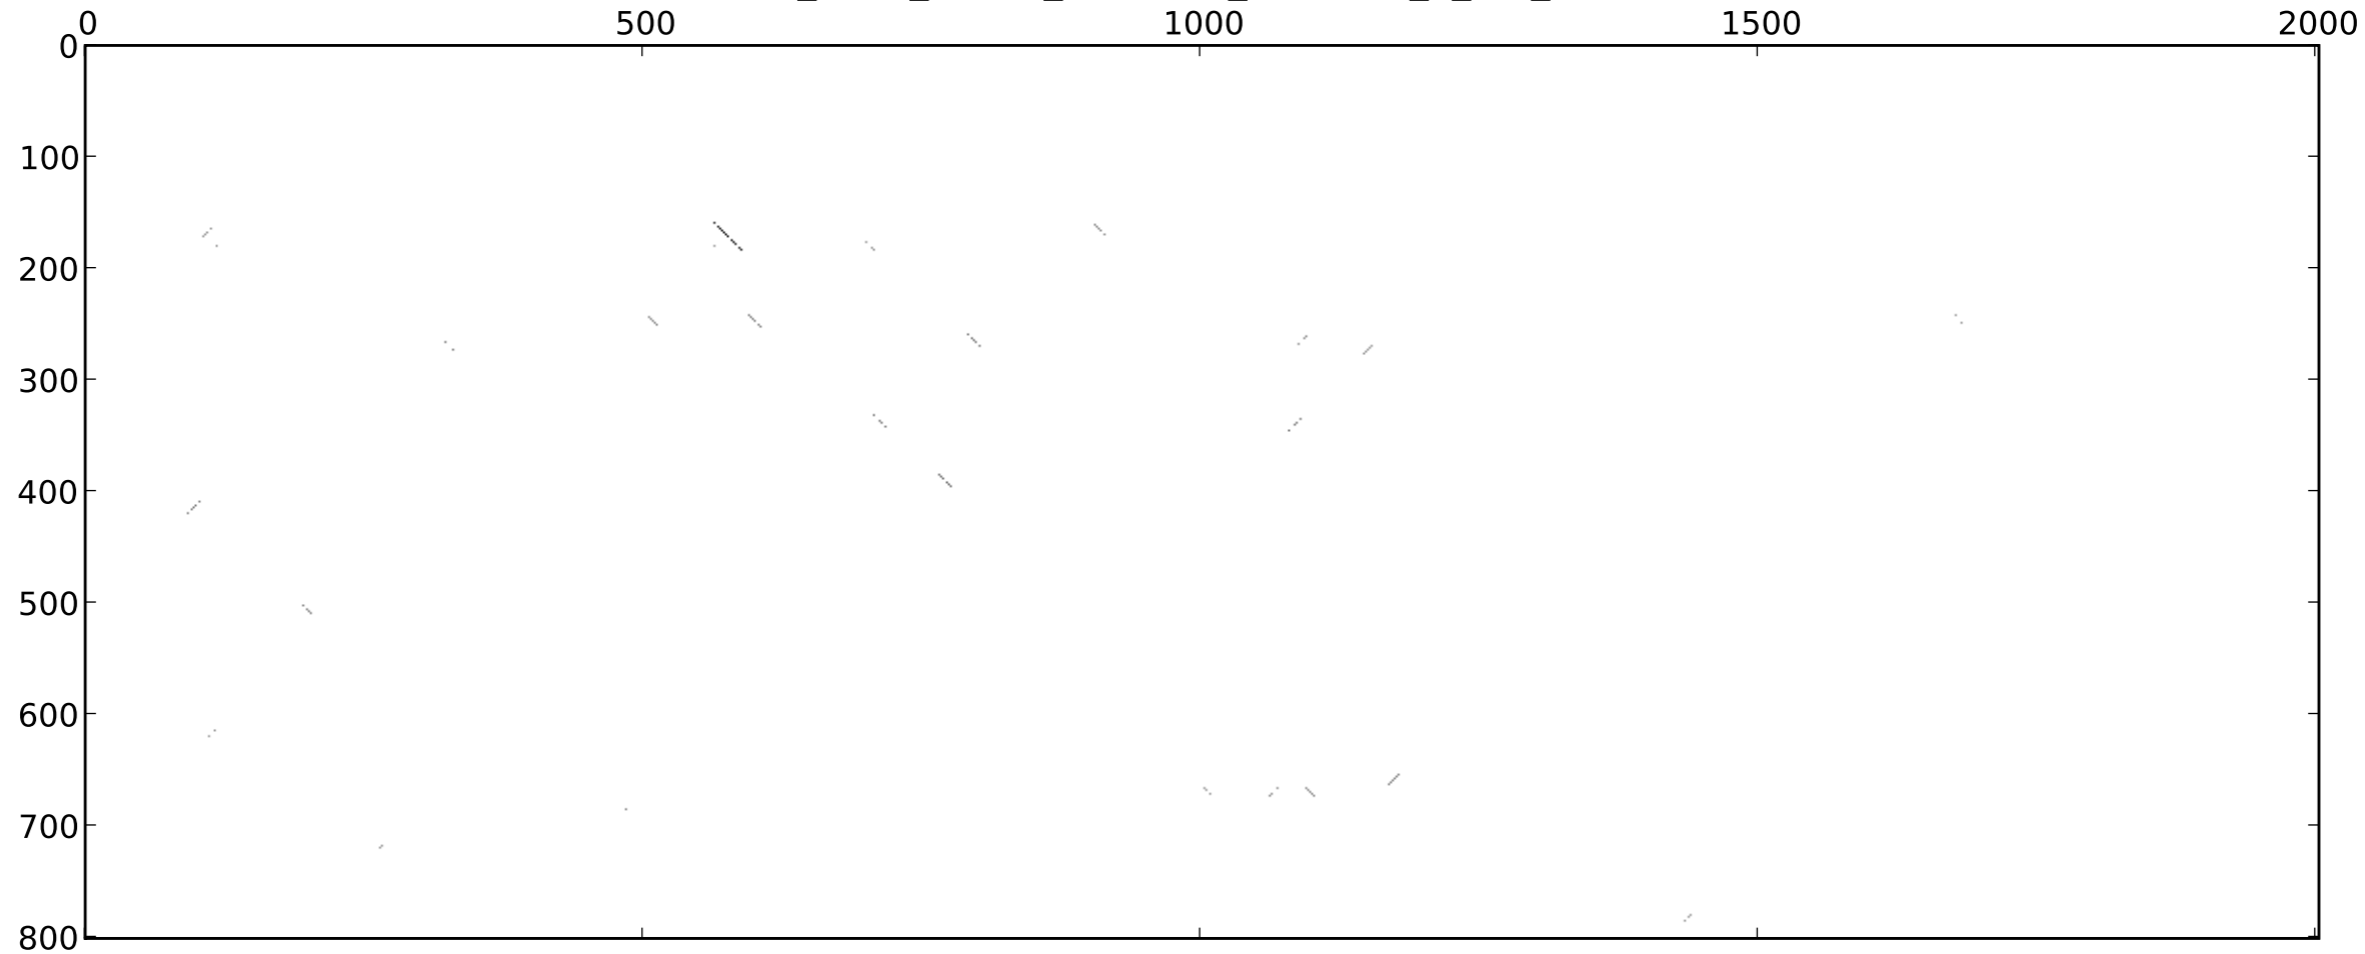

st46\_dmel\_themira\_putris\_blastplot\_9\_rev\_normed

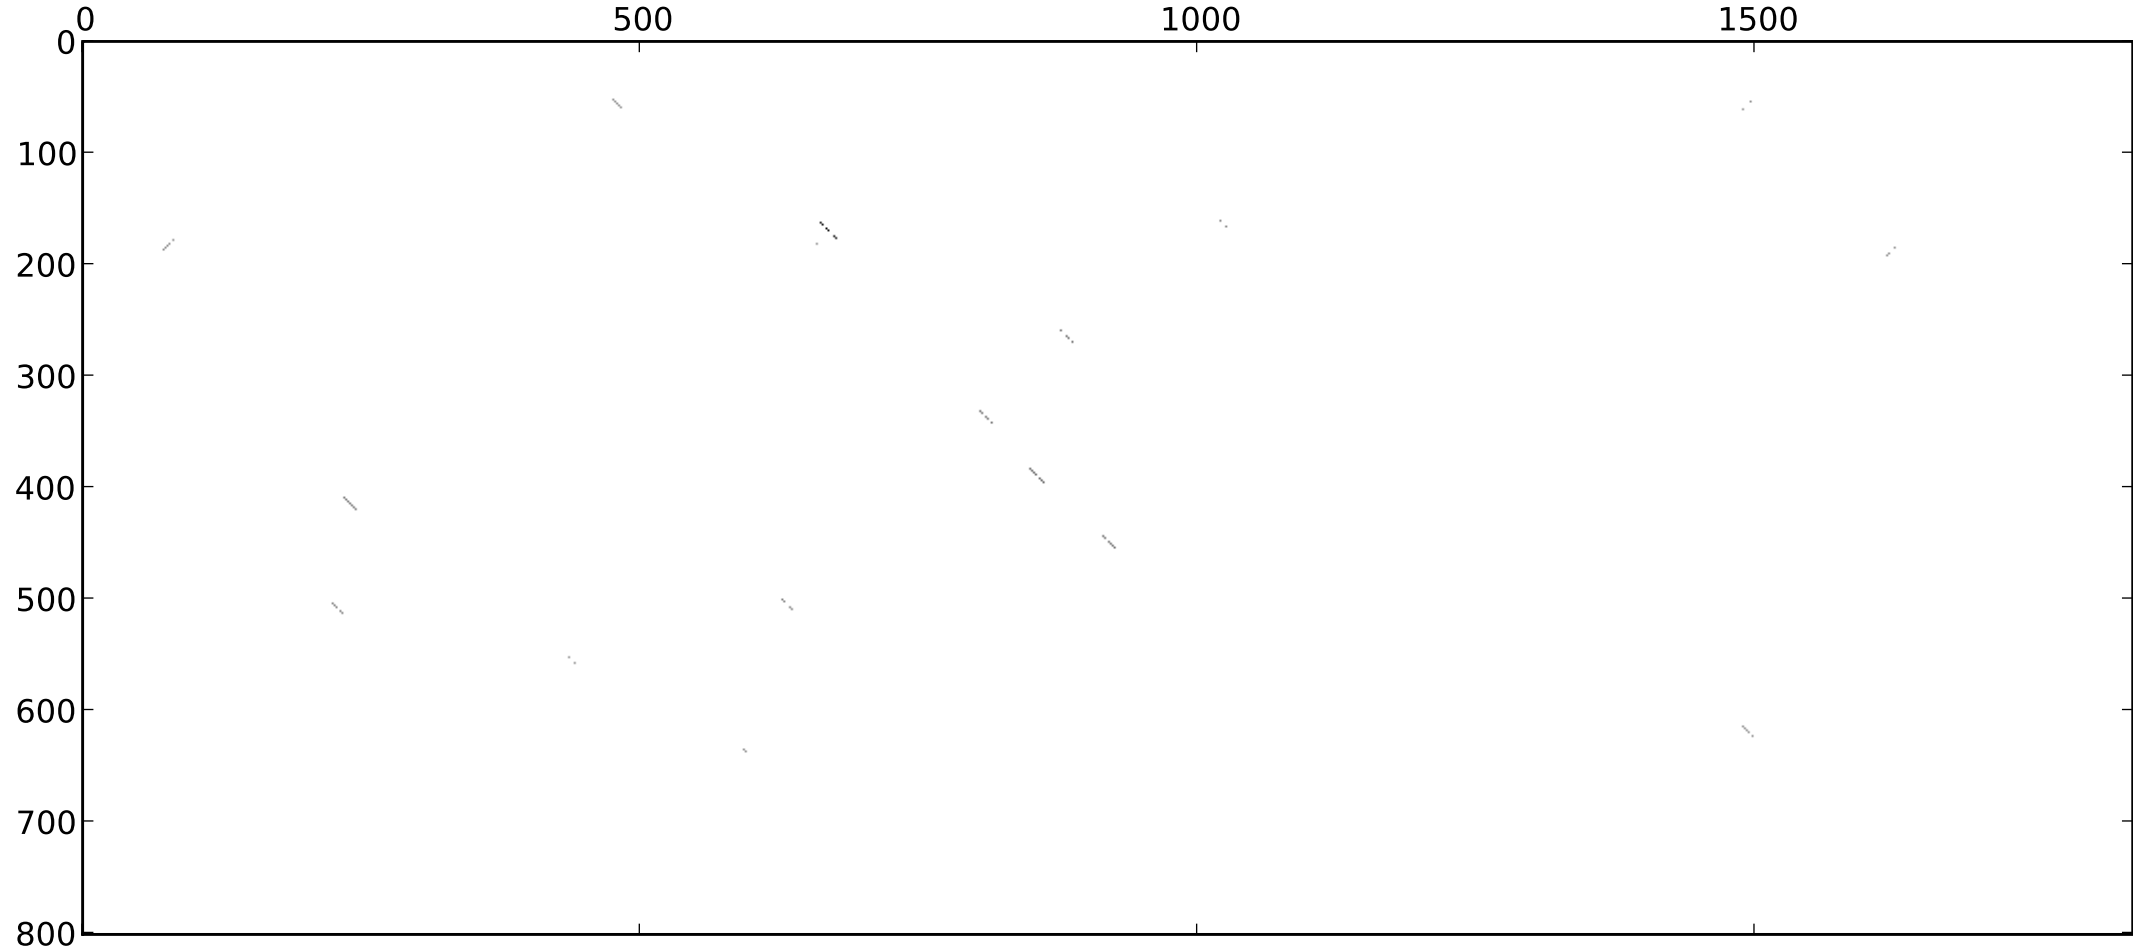

MHE\_dmel\_dpse\_blastplot\_9\_rev\_normed

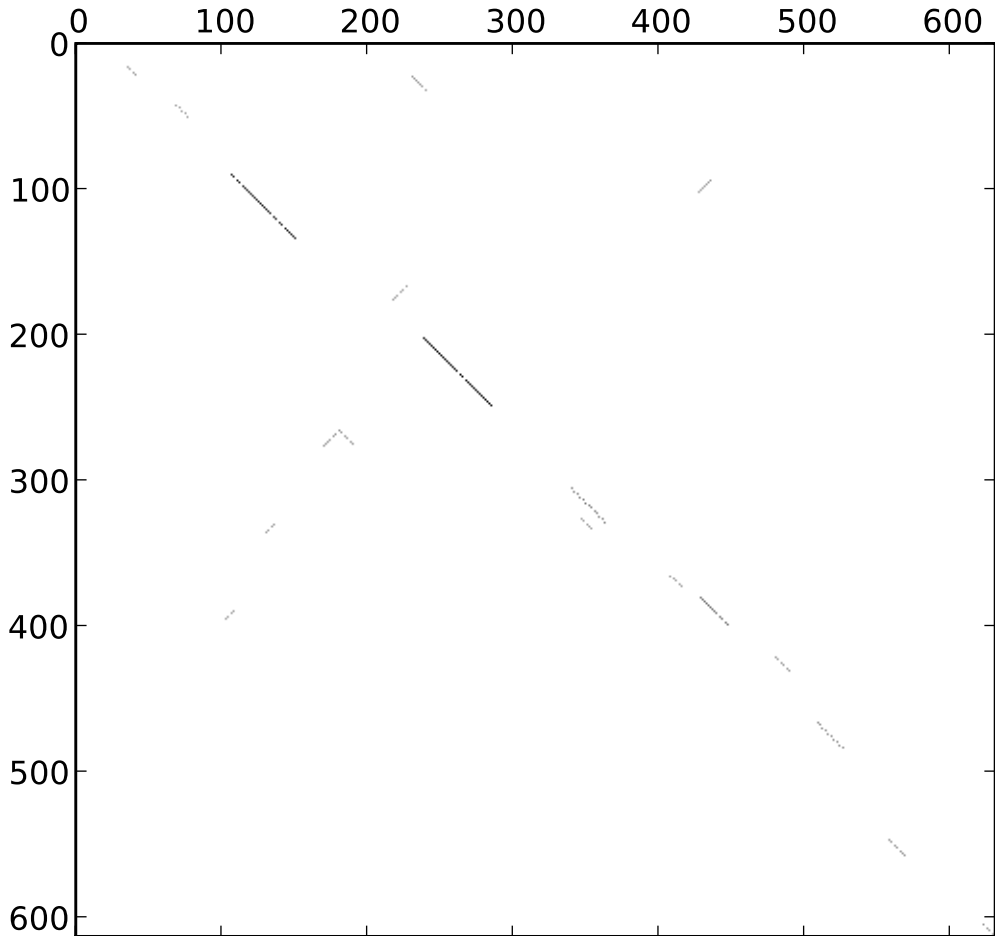

# MHE\_dmel\_dvir\_blastplot\_9\_rev\_normed

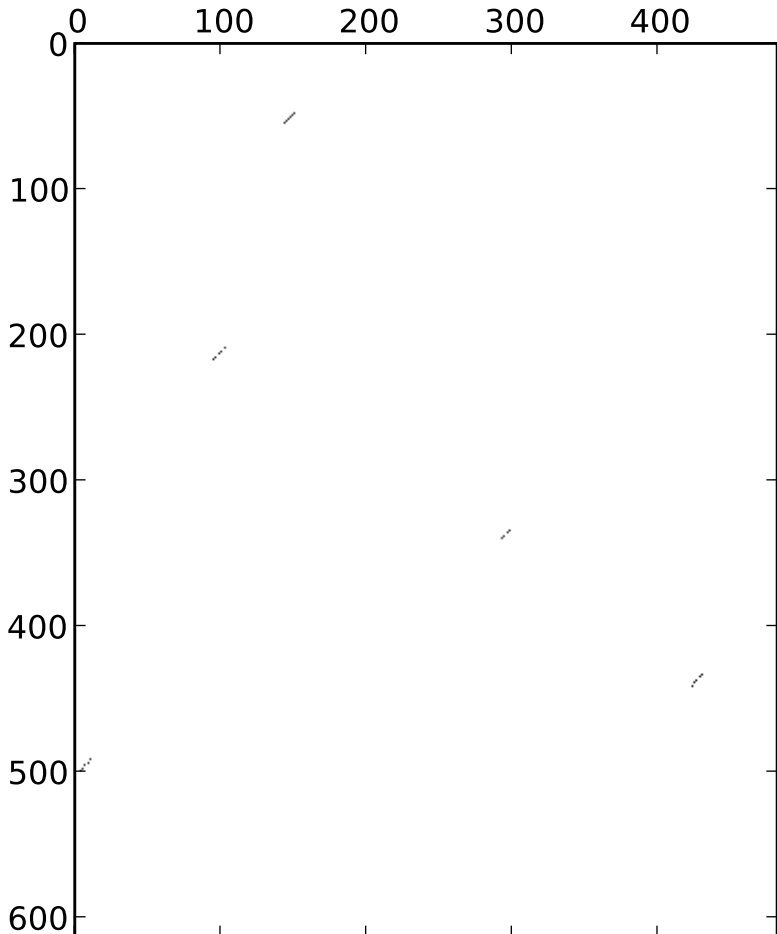

MHE\_dmel\_sepsis\_cynipsea\_blastplot\_9\_rev\_normed

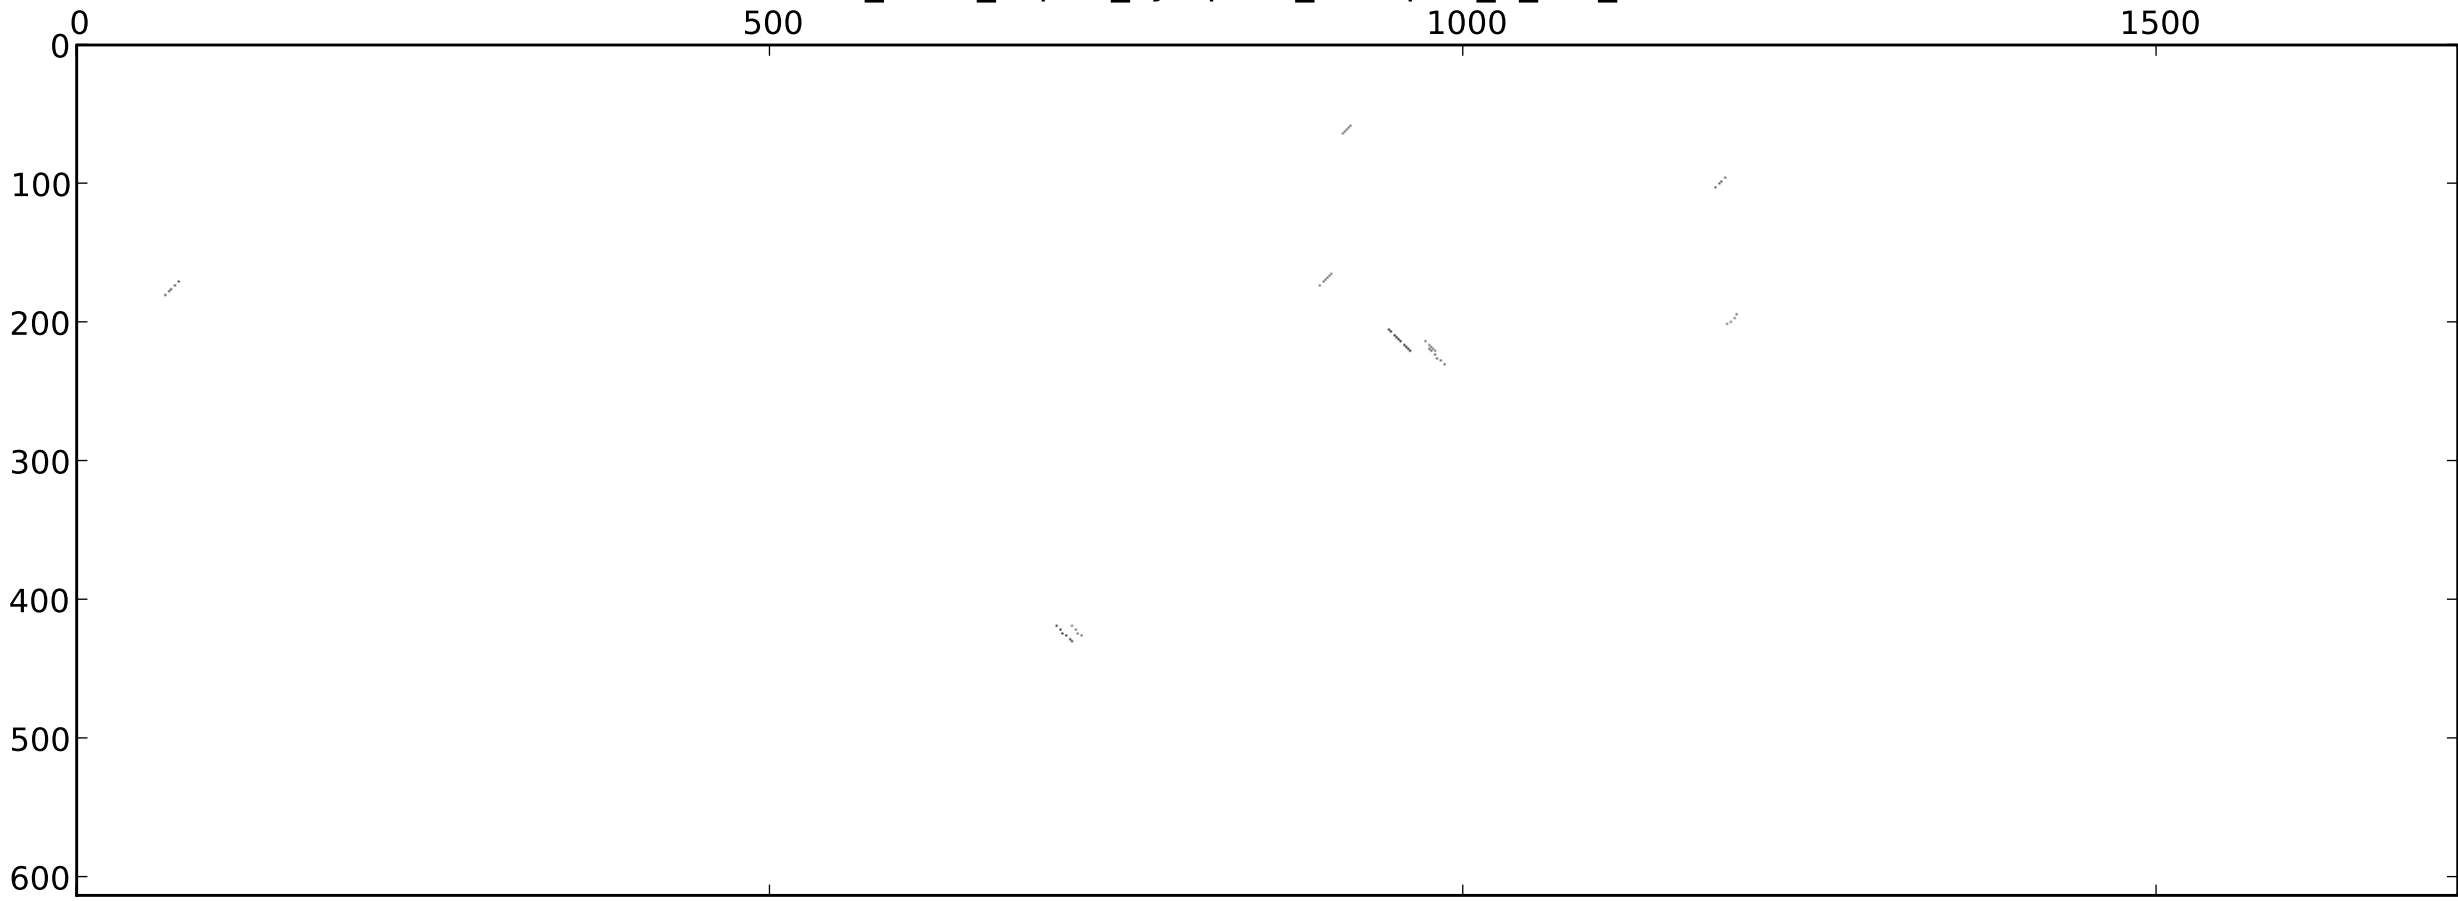

MHE\_dmel\_themira\_putris\_blastplot\_9\_rev\_normed

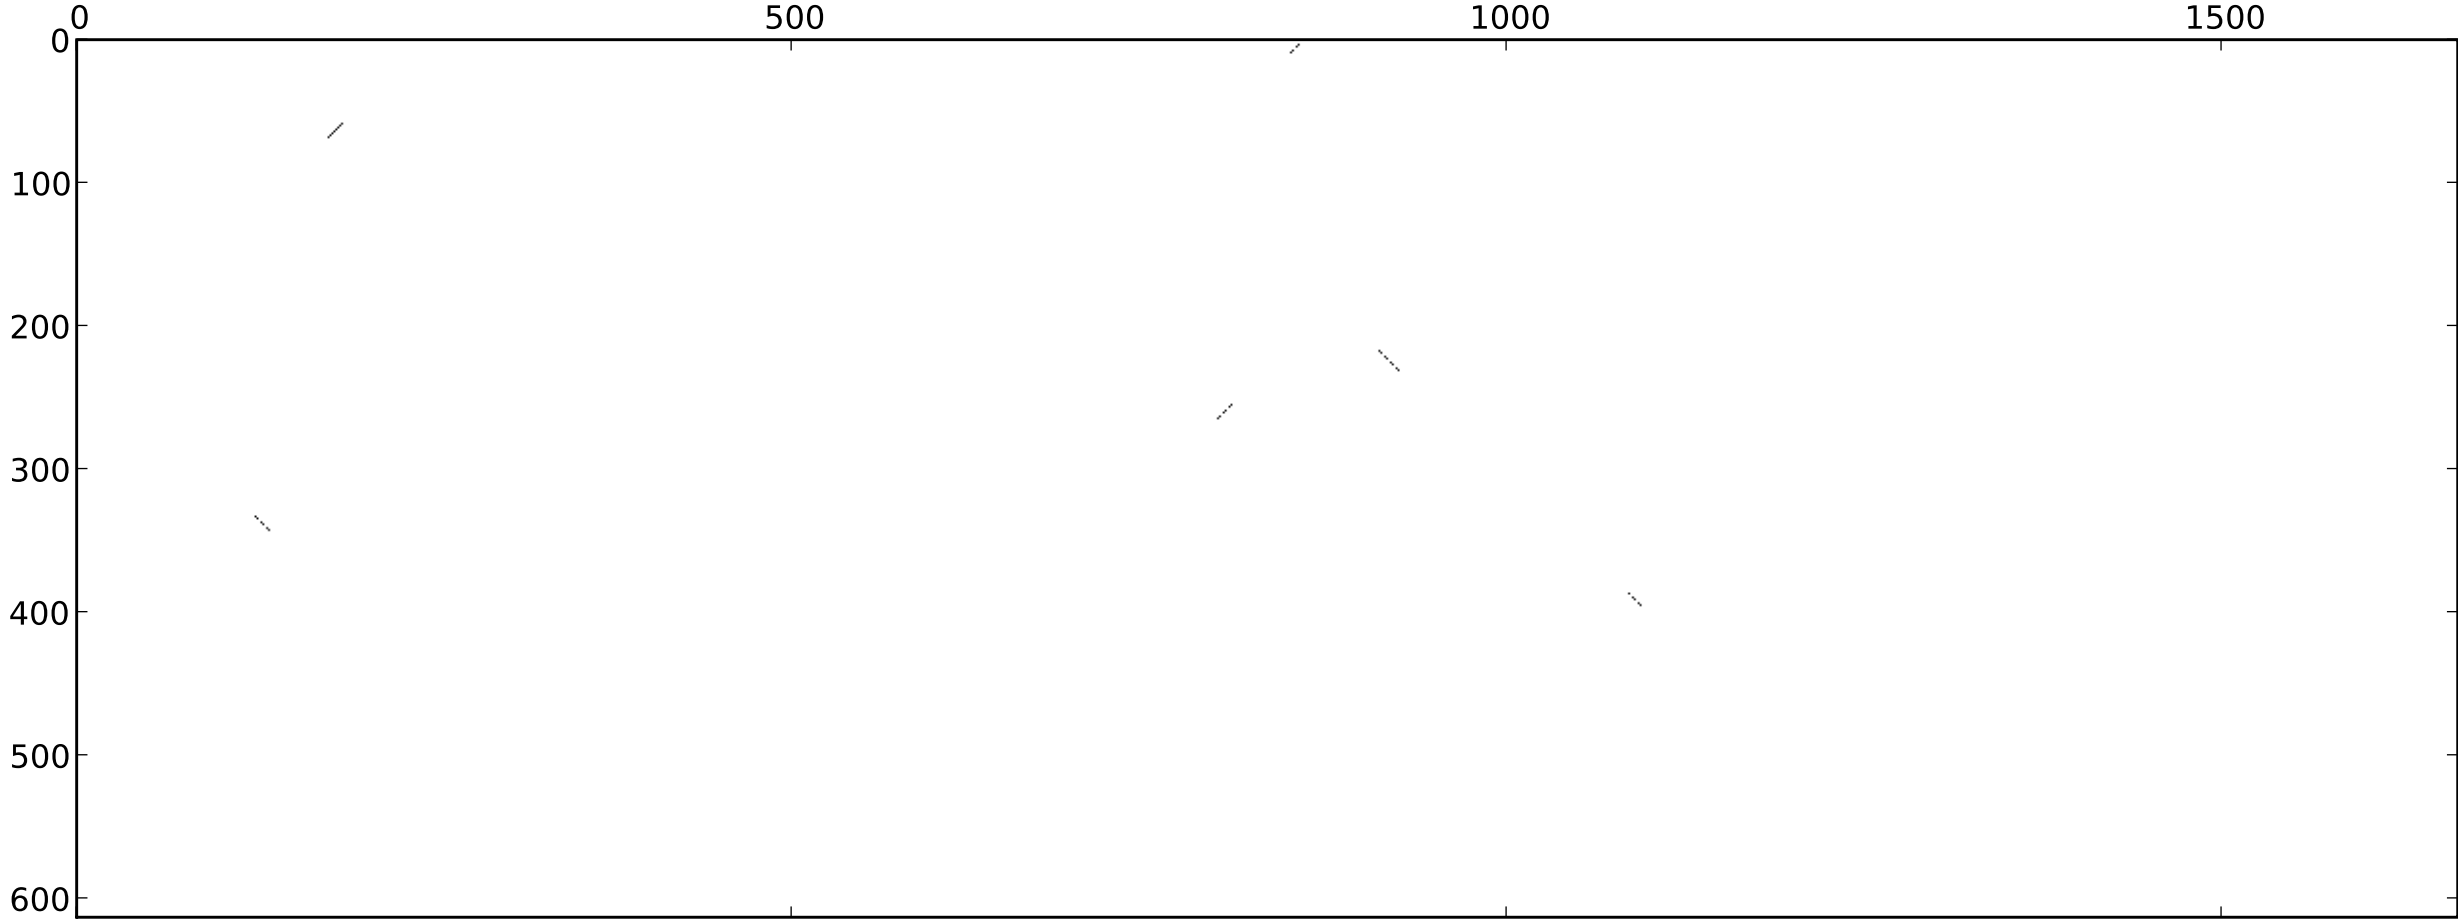



st2\_dmel\_dpse\_blastplot\_7\_rev\_normed

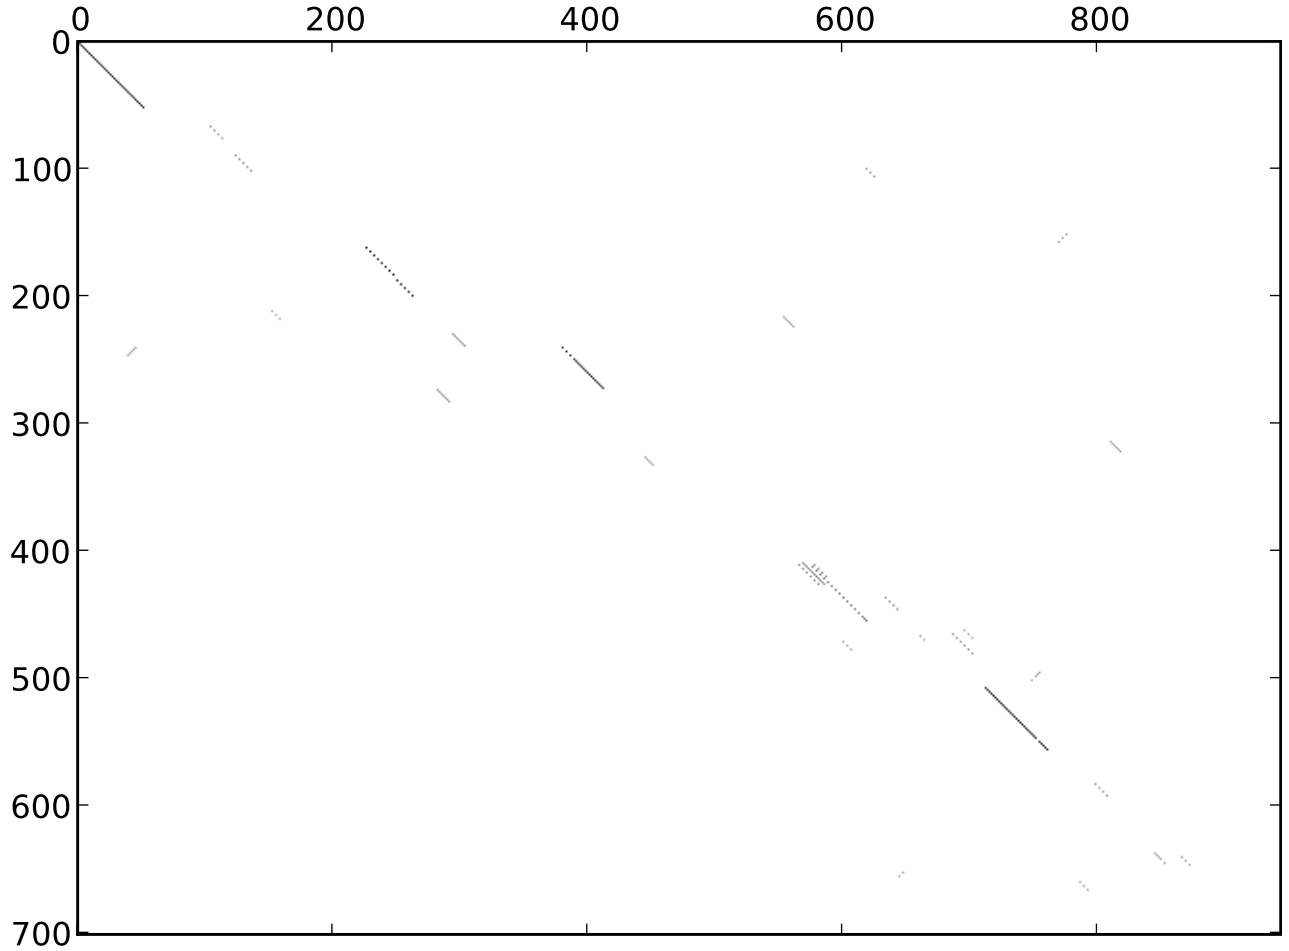

st2\_dmel\_dvir\_blastplot\_7\_rev\_normed

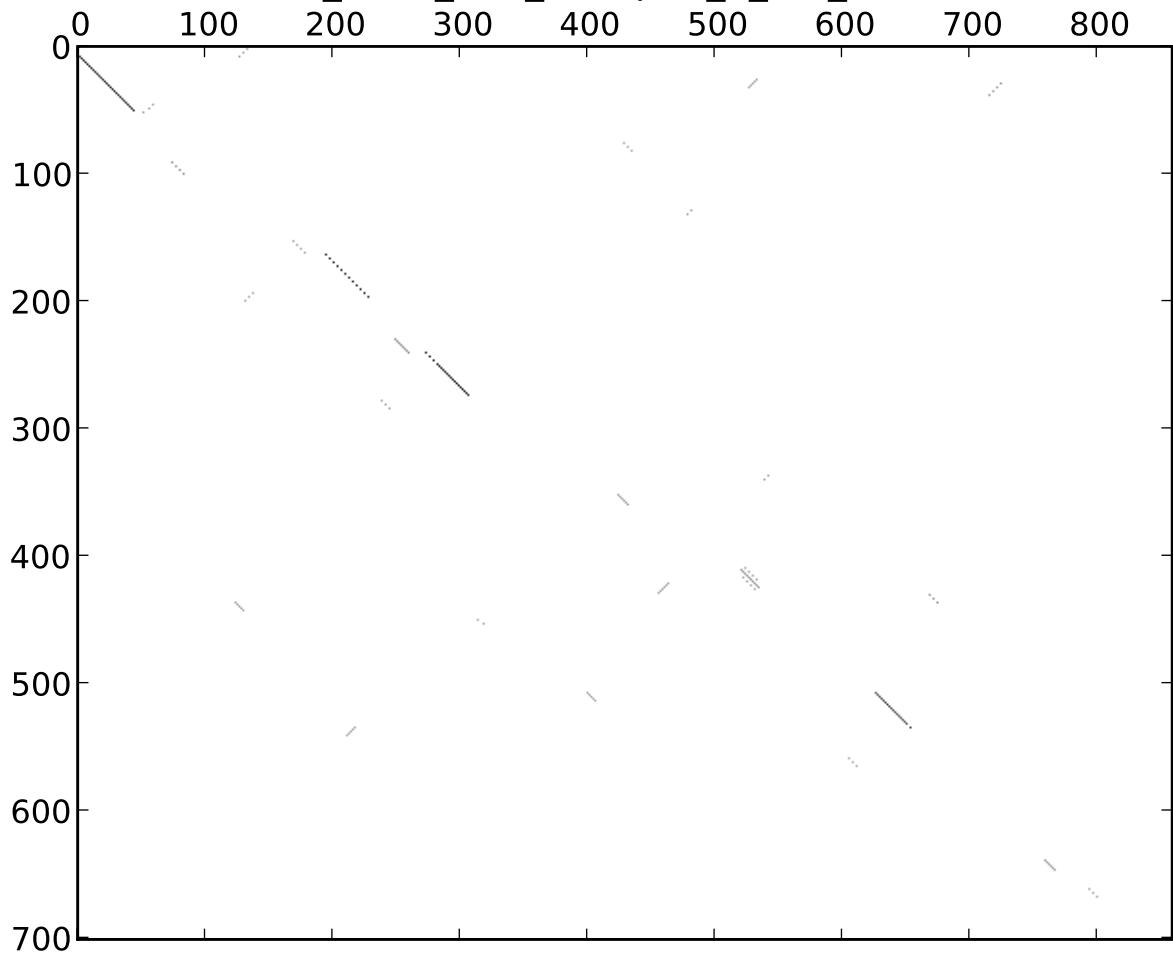

st2\_dmel\_sepsis\_cynipsea\_blastplot\_7\_rev\_normed

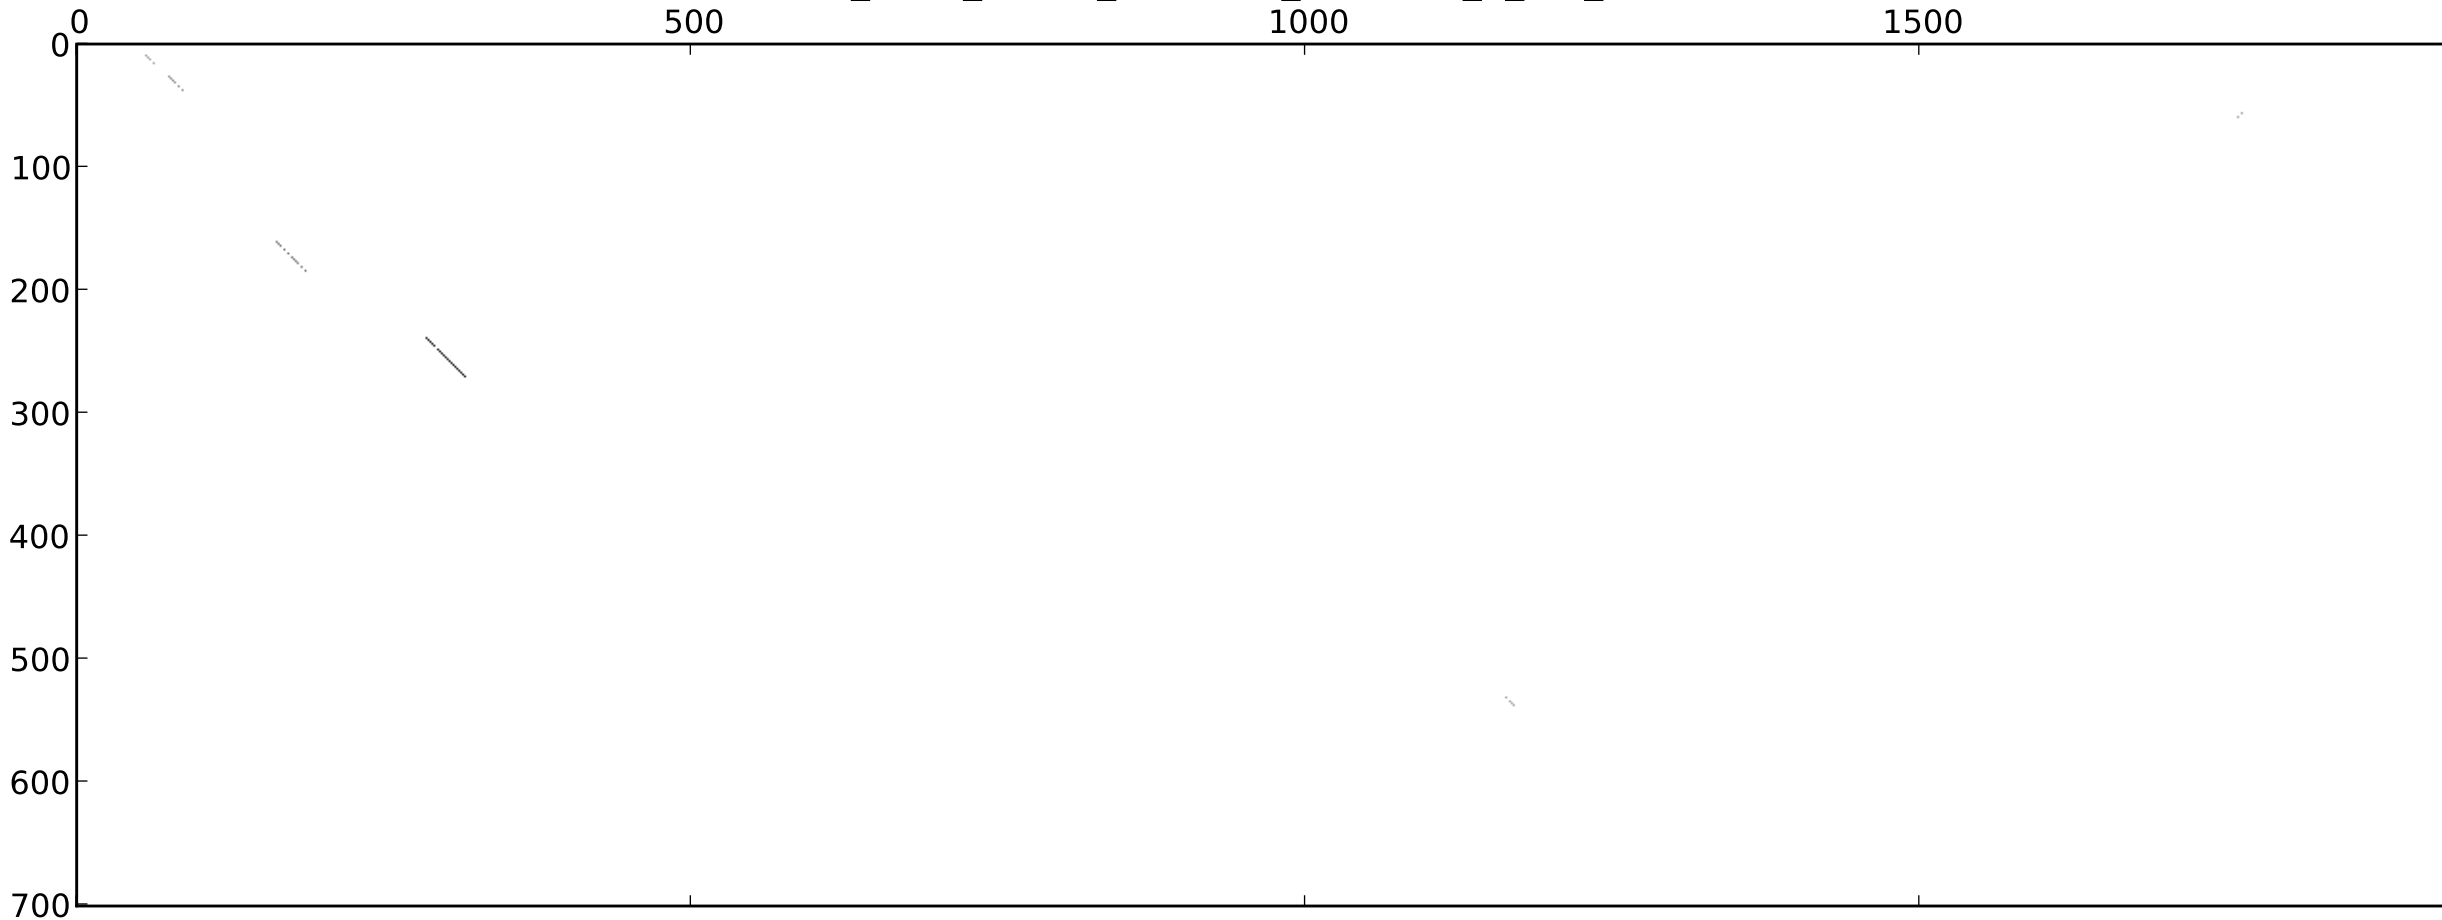

st2\_dmel\_themira\_putris\_blastplot\_7\_rev\_normed

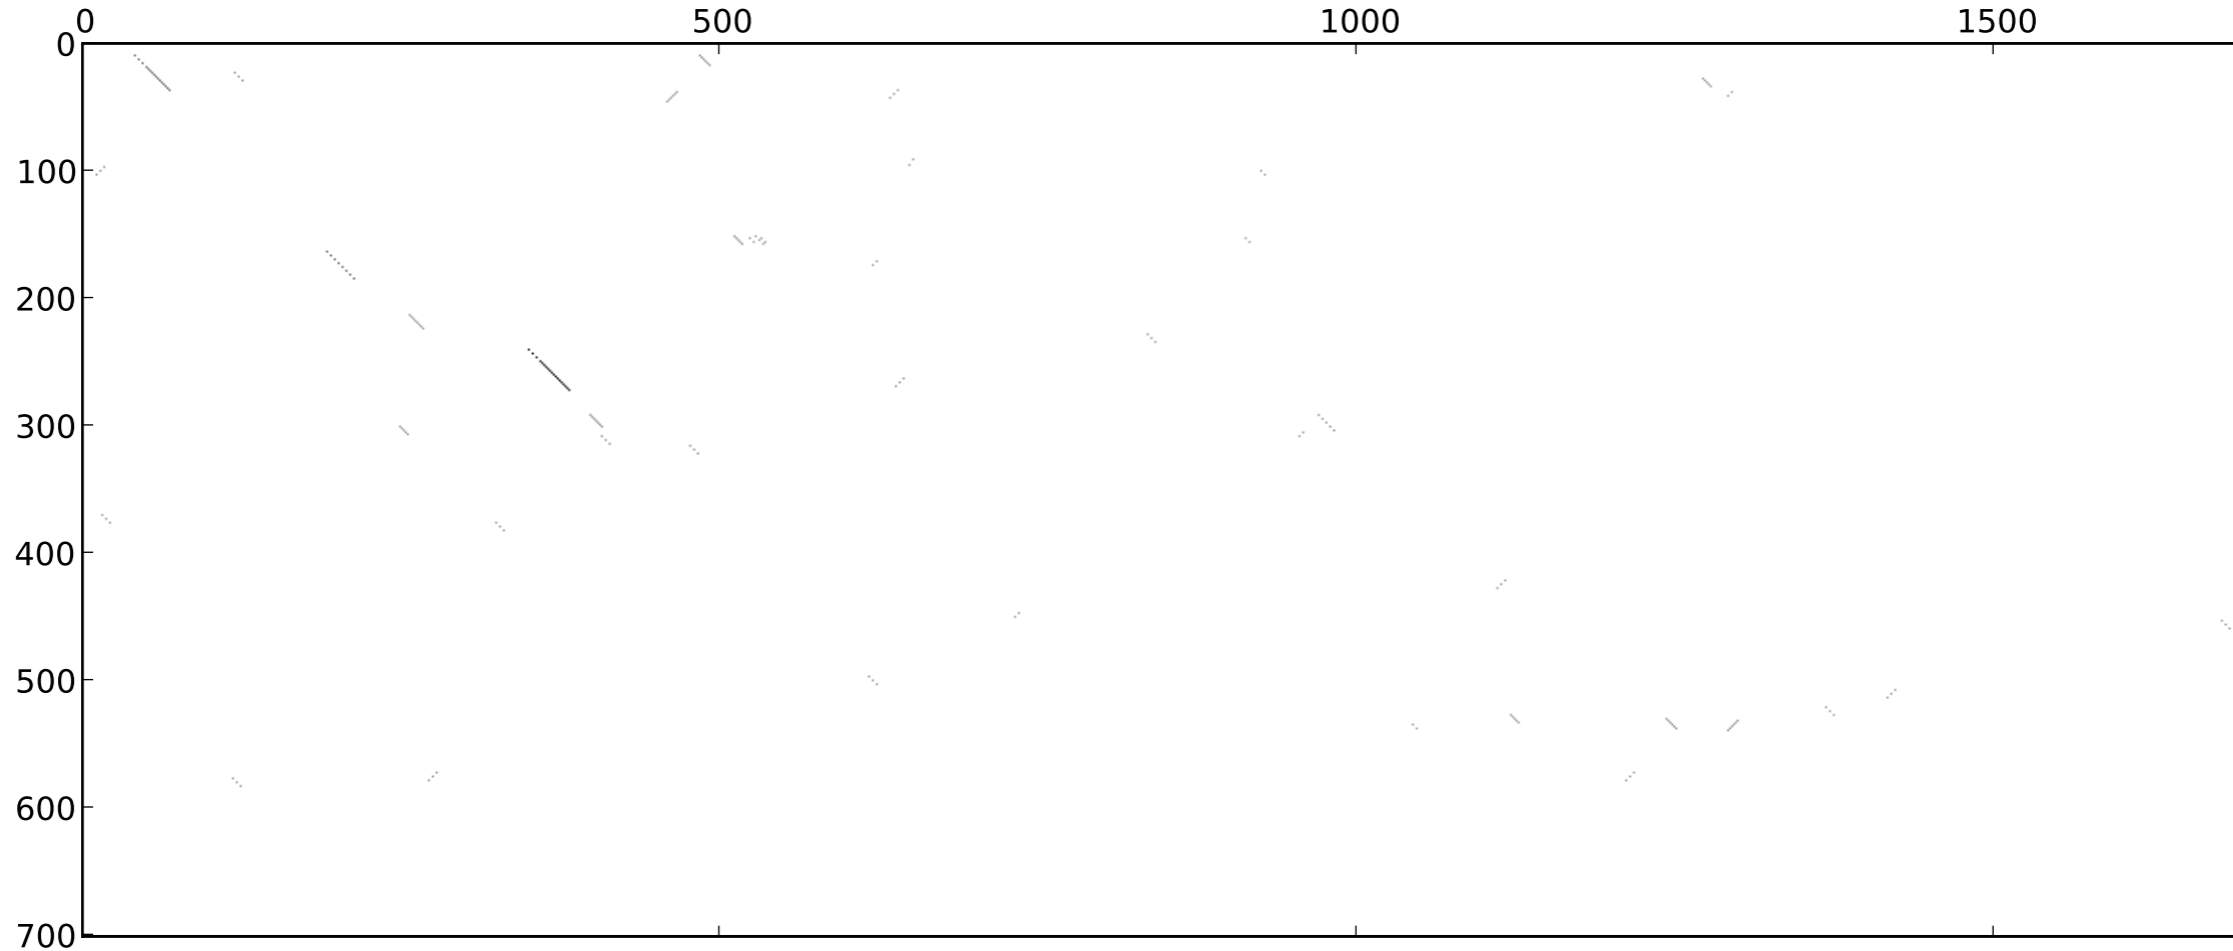

st37\_dmel\_dpse\_blastplot\_7\_rev\_normed

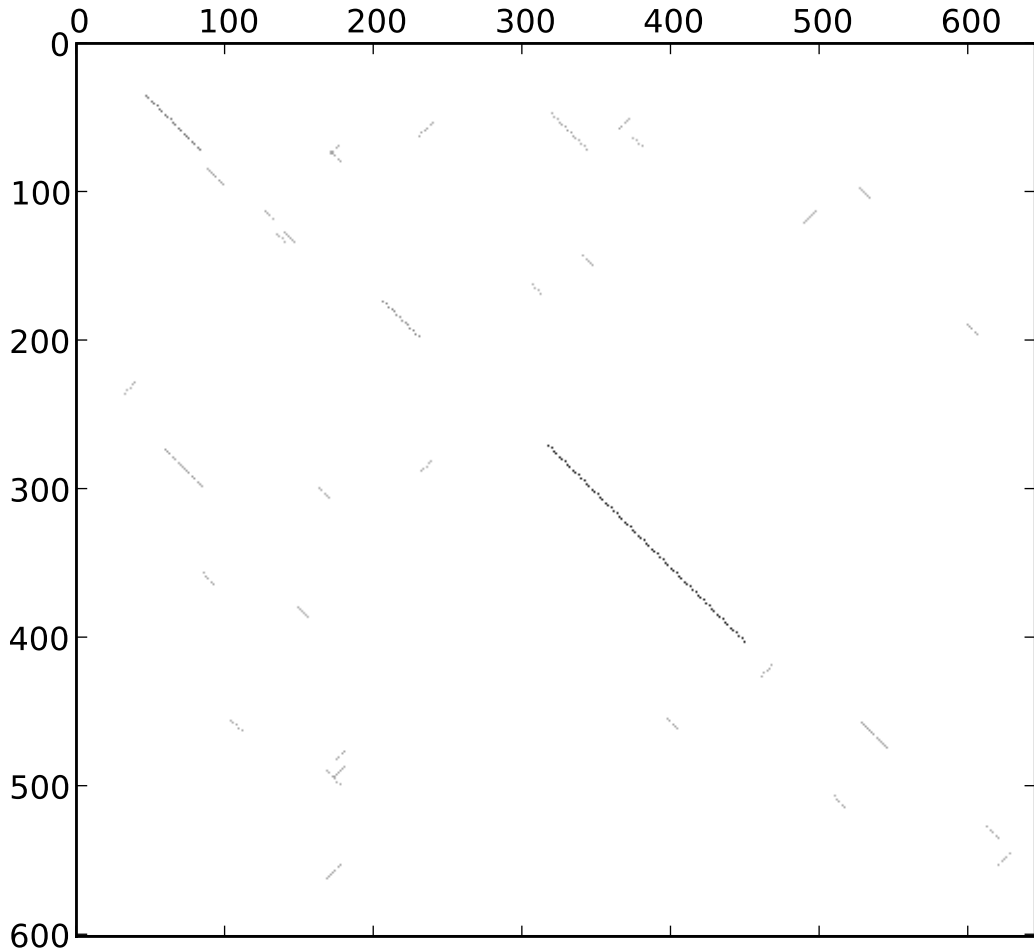

st37\_dmel\_dvir\_blastplot\_7\_rev\_normed

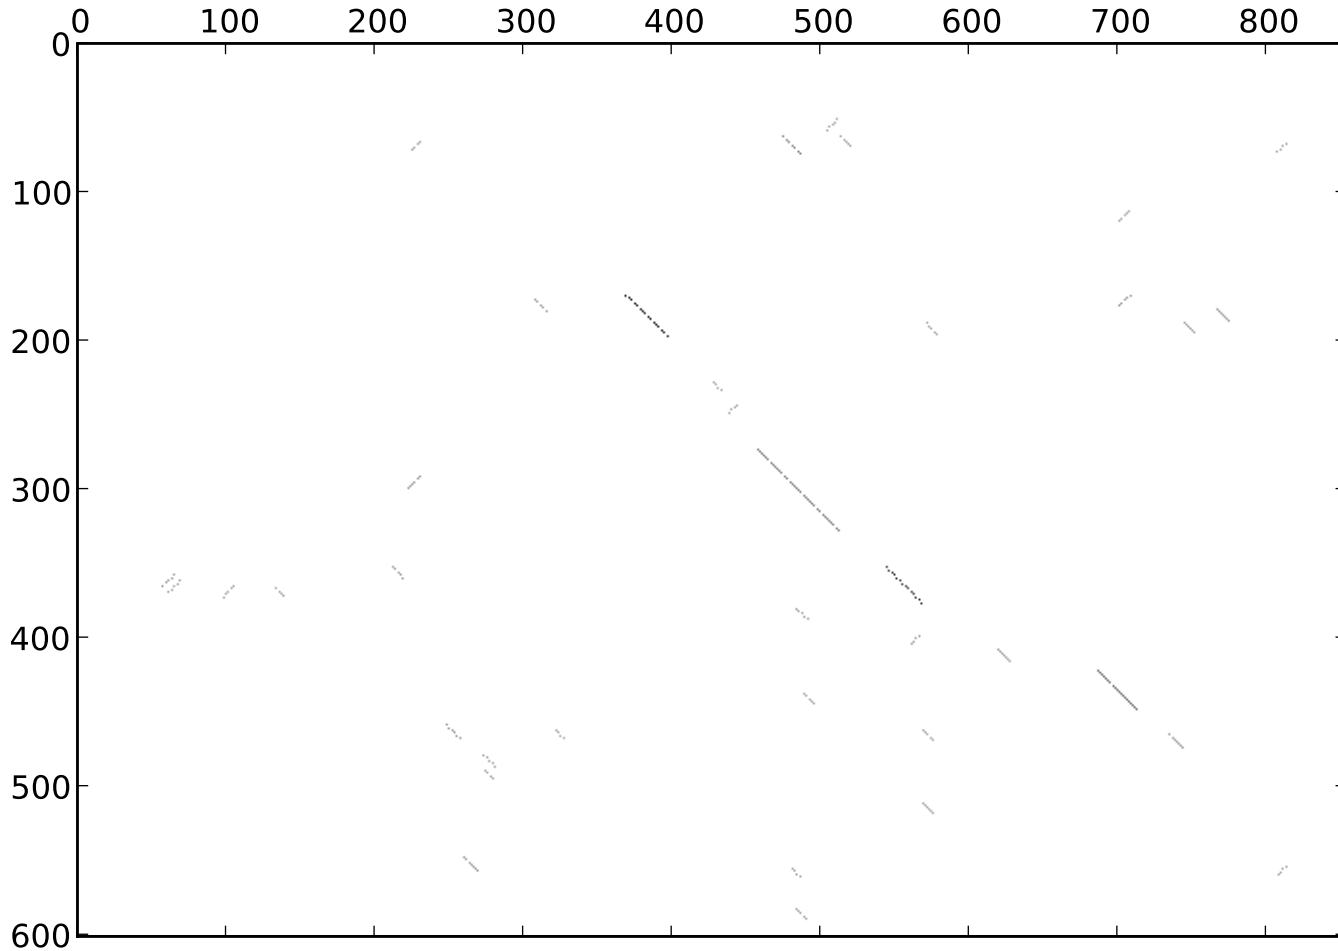

st37\_dmel\_sepsis\_cynipsea\_blastplot\_7\_rev\_normed

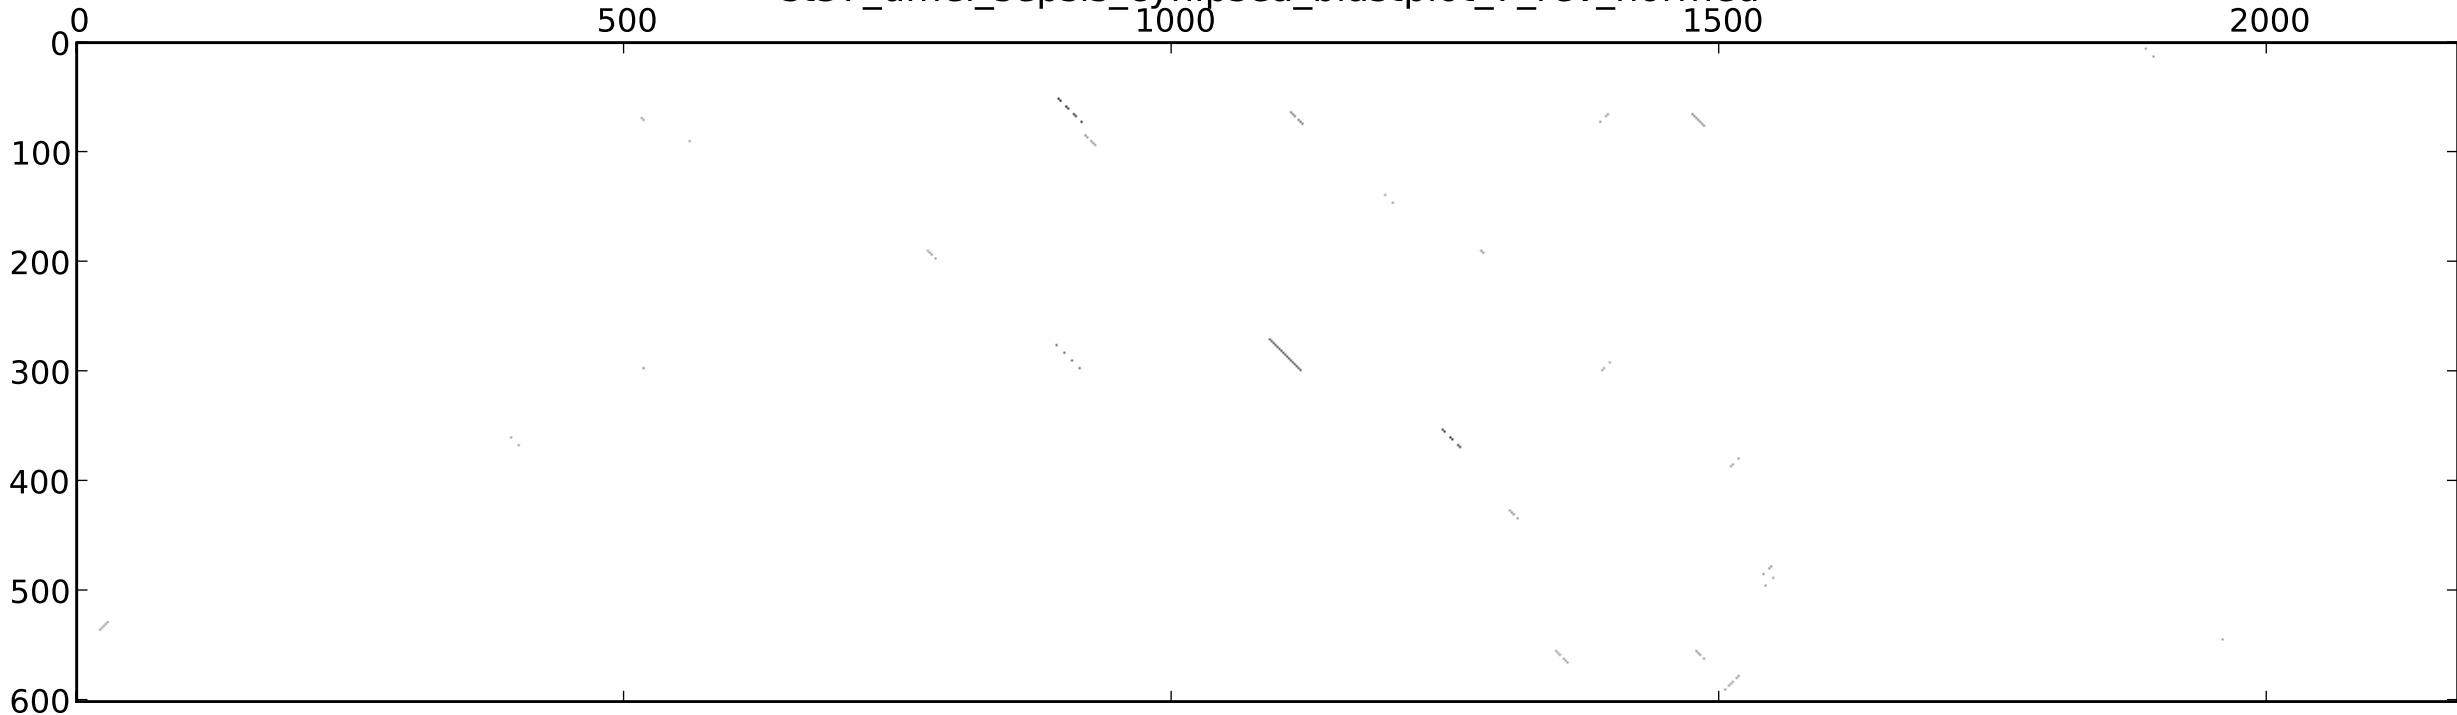

st37\_dmel\_themira\_putris\_blastplot\_7\_rev\_normed

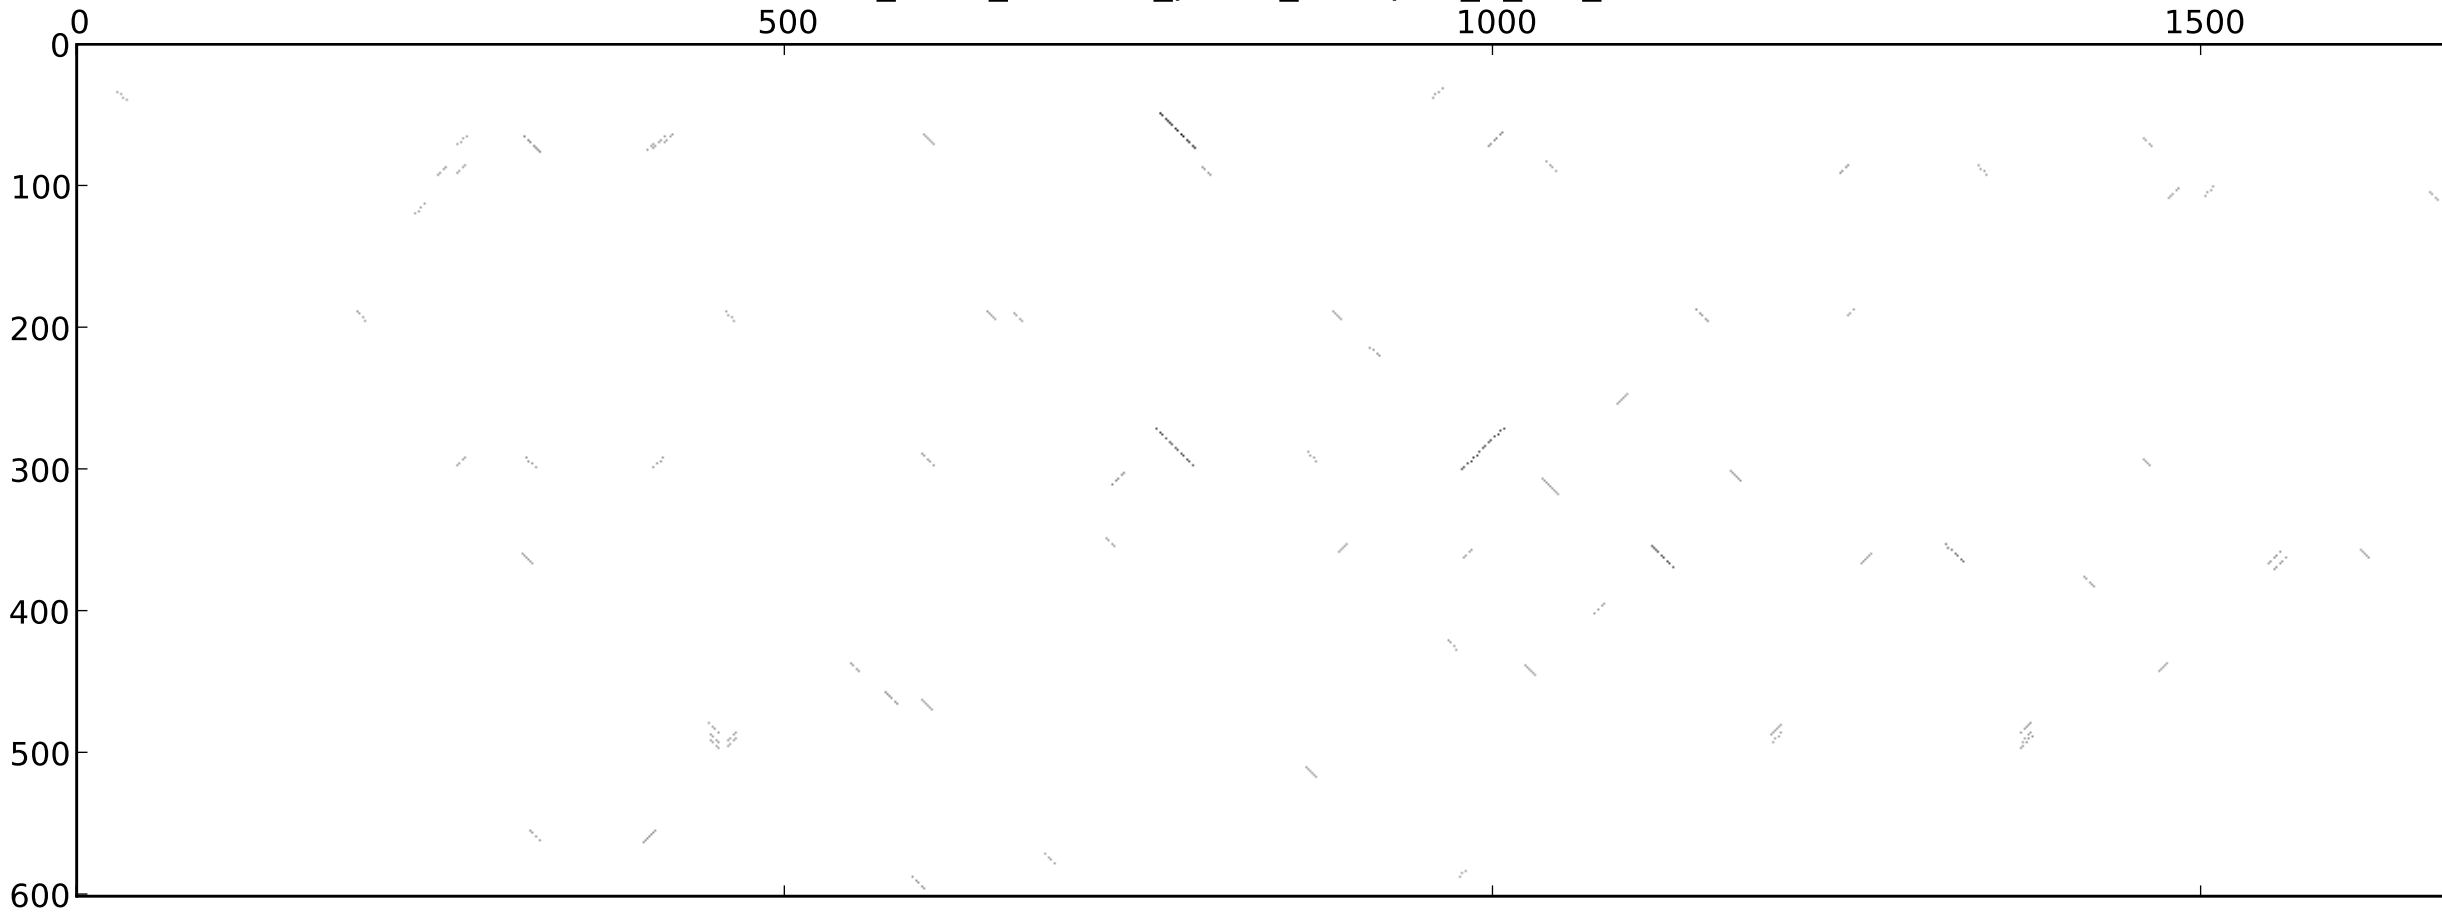



st46\_dmel\_dpse\_blastplot\_7\_rev\_normed

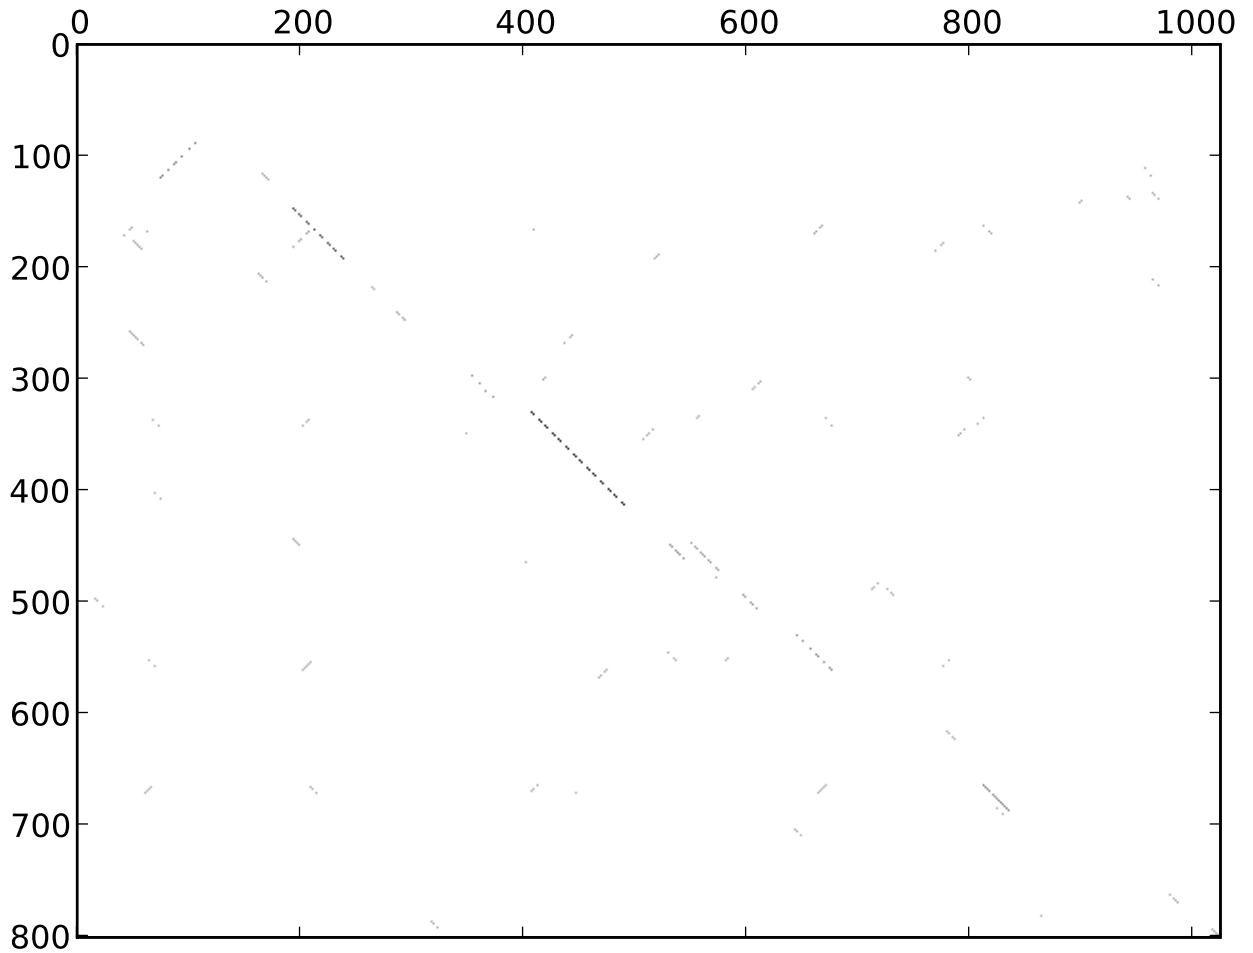

st46\_dmel\_dvir\_blastplot\_7\_rev\_normed

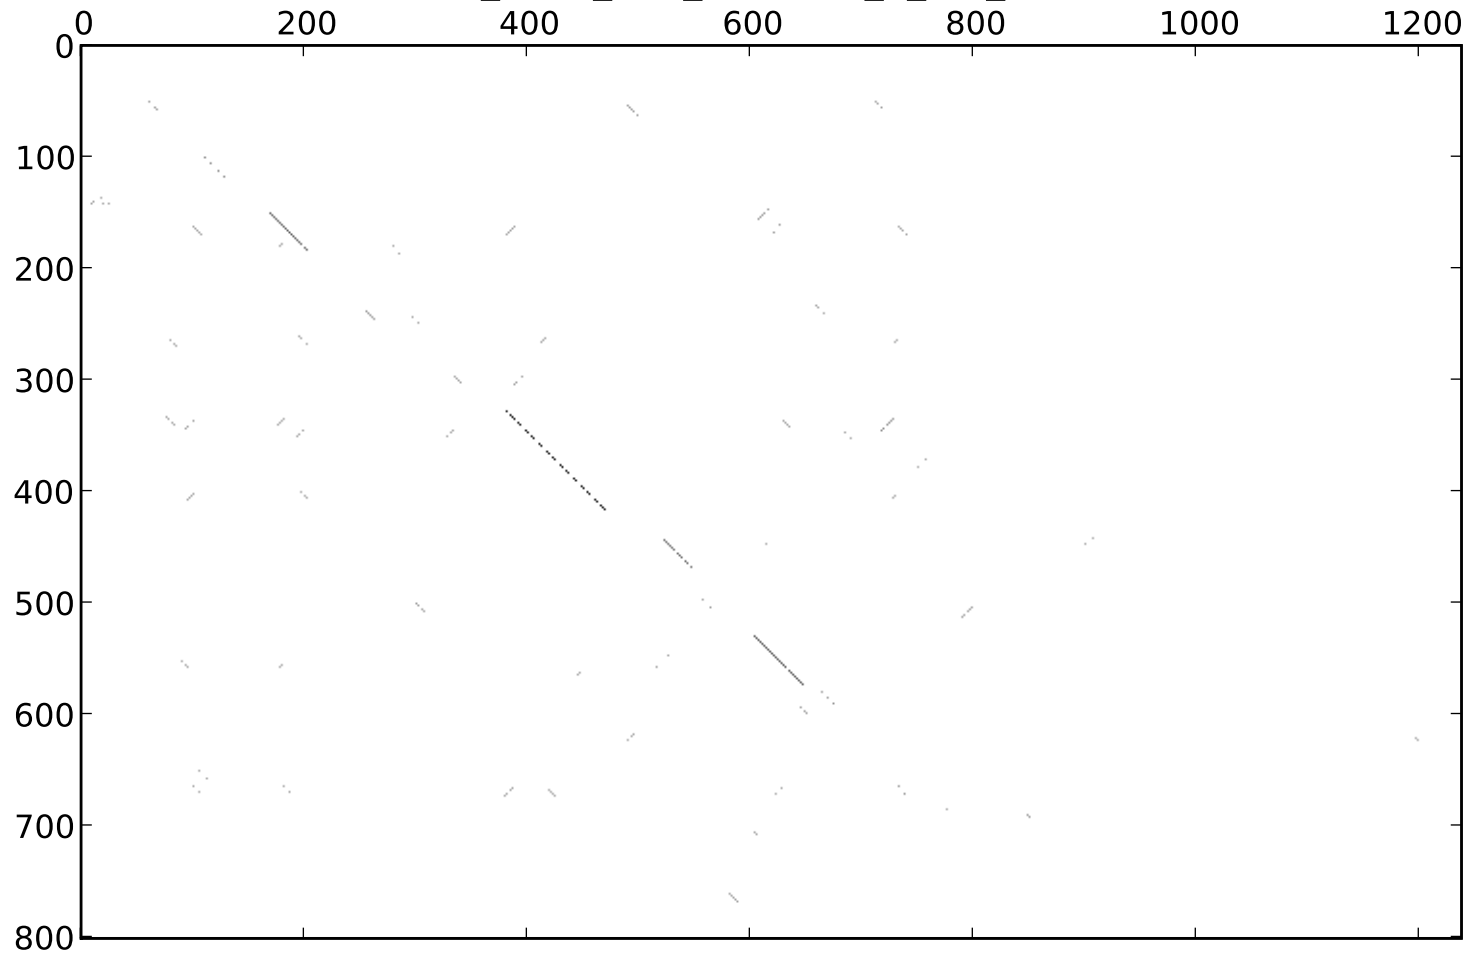

st46\_dmel\_sepsis\_cynipsea\_blastplot\_7\_rev\_normed

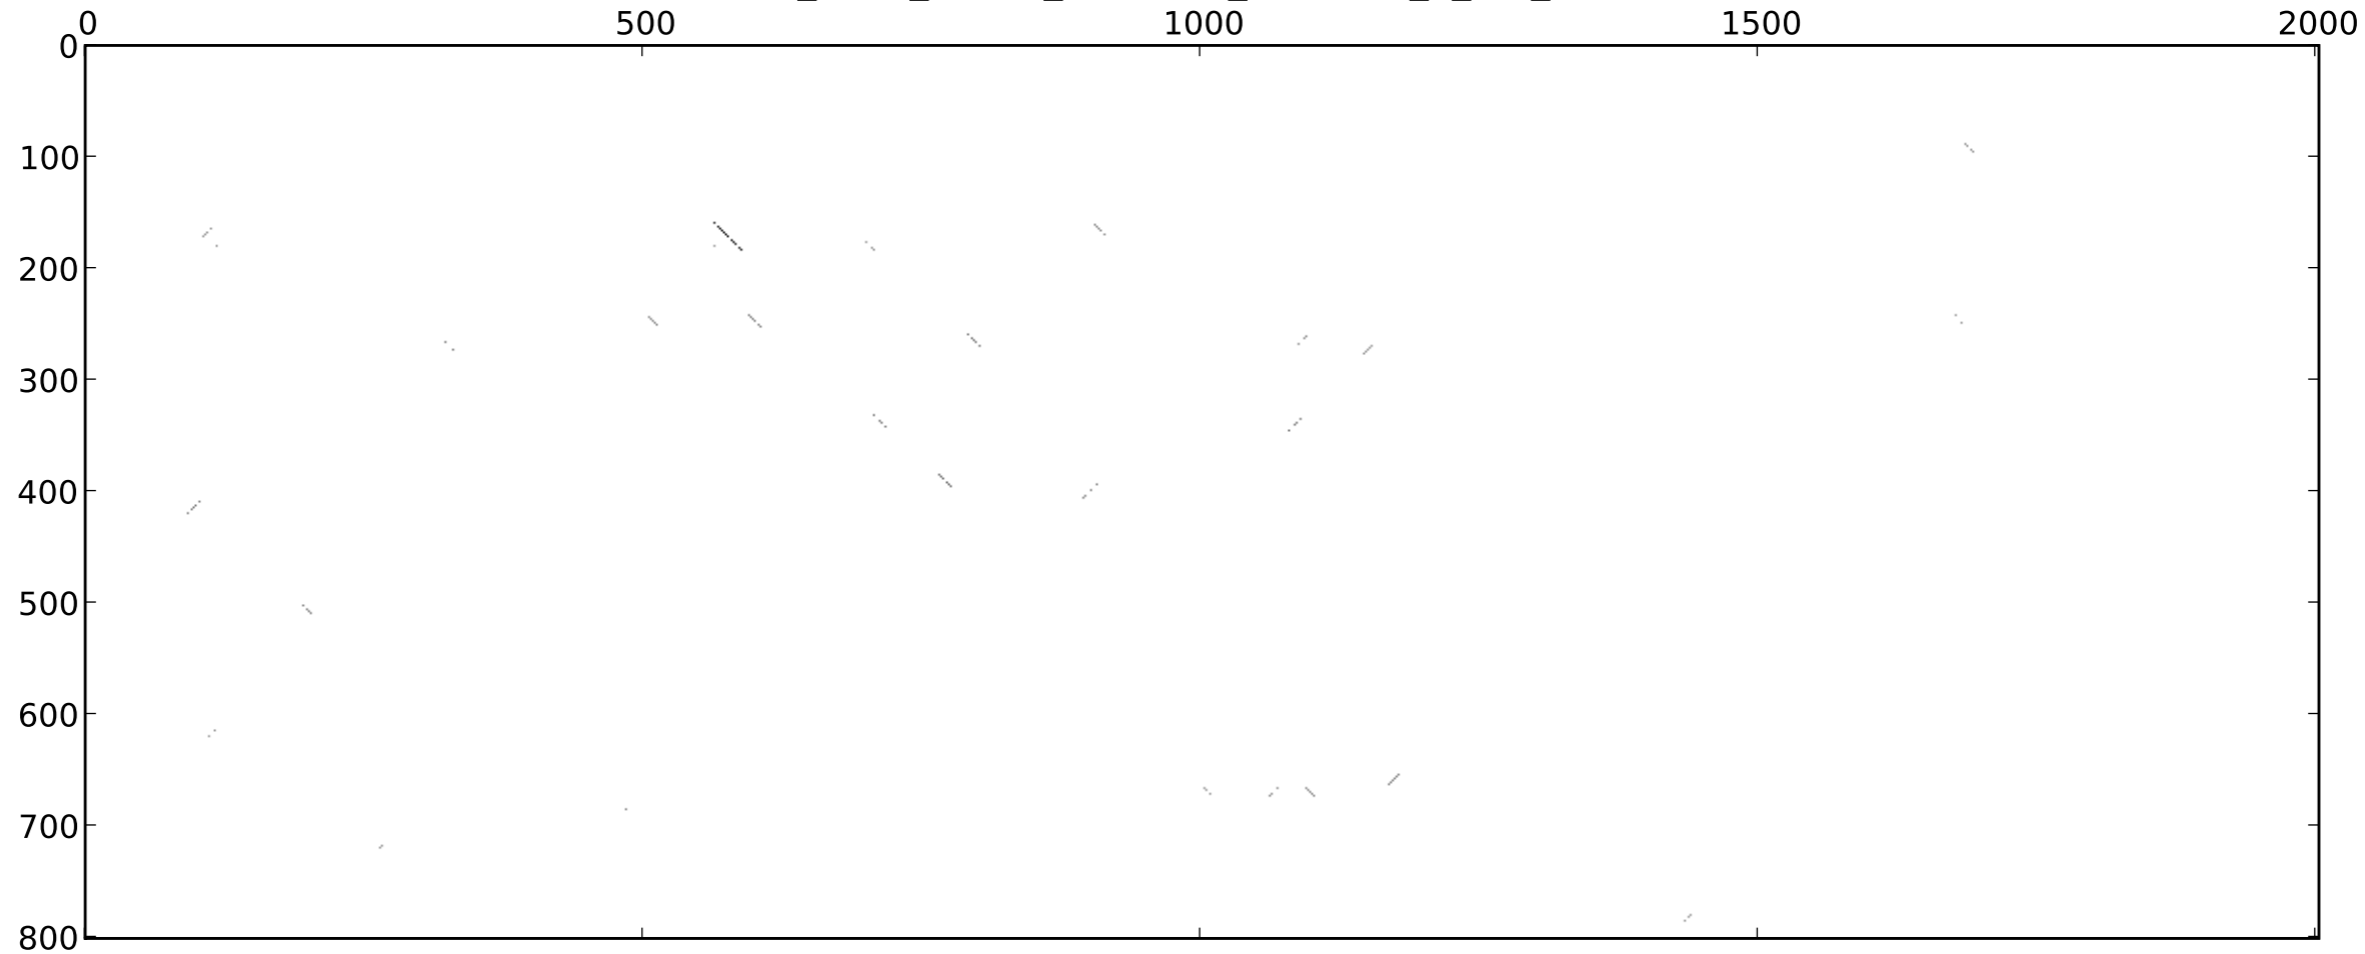

st46\_dmel\_themira\_putris\_blastplot\_7\_rev\_normed

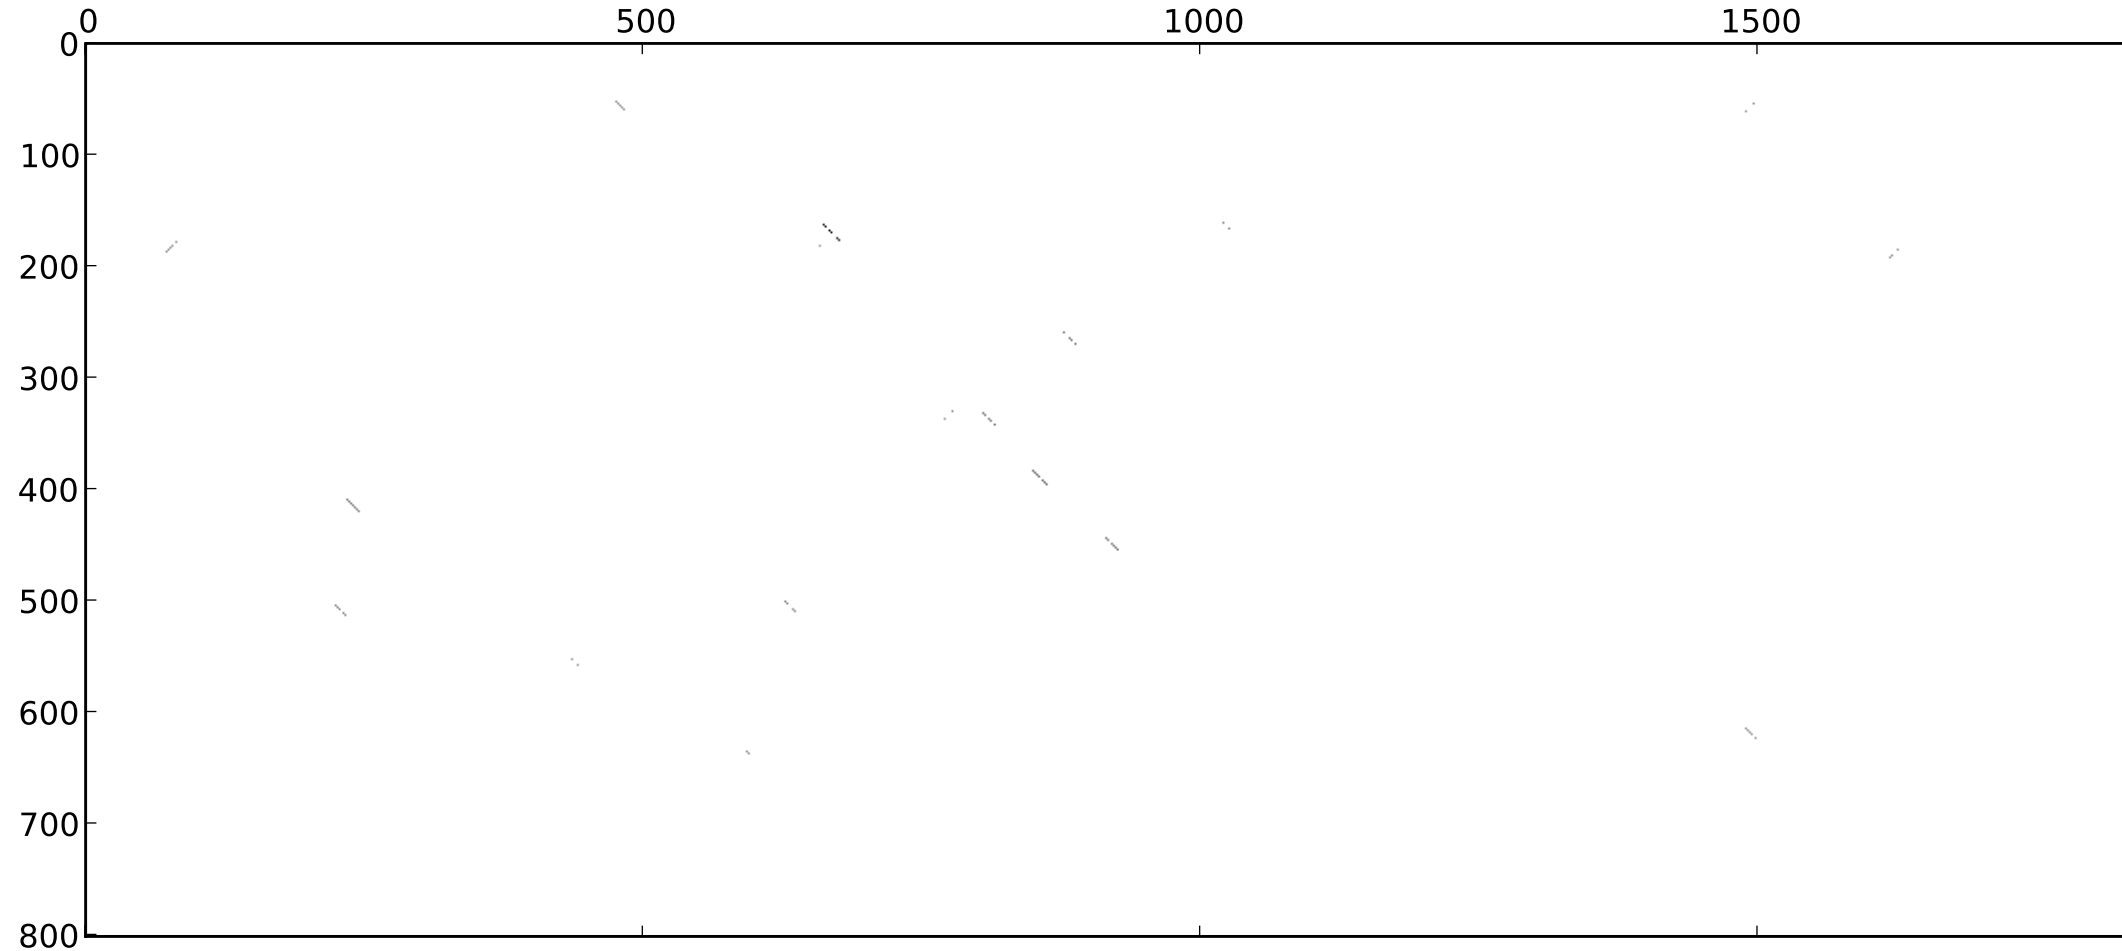

MHE\_dmel\_dpse\_blastplot\_7\_rev\_normed

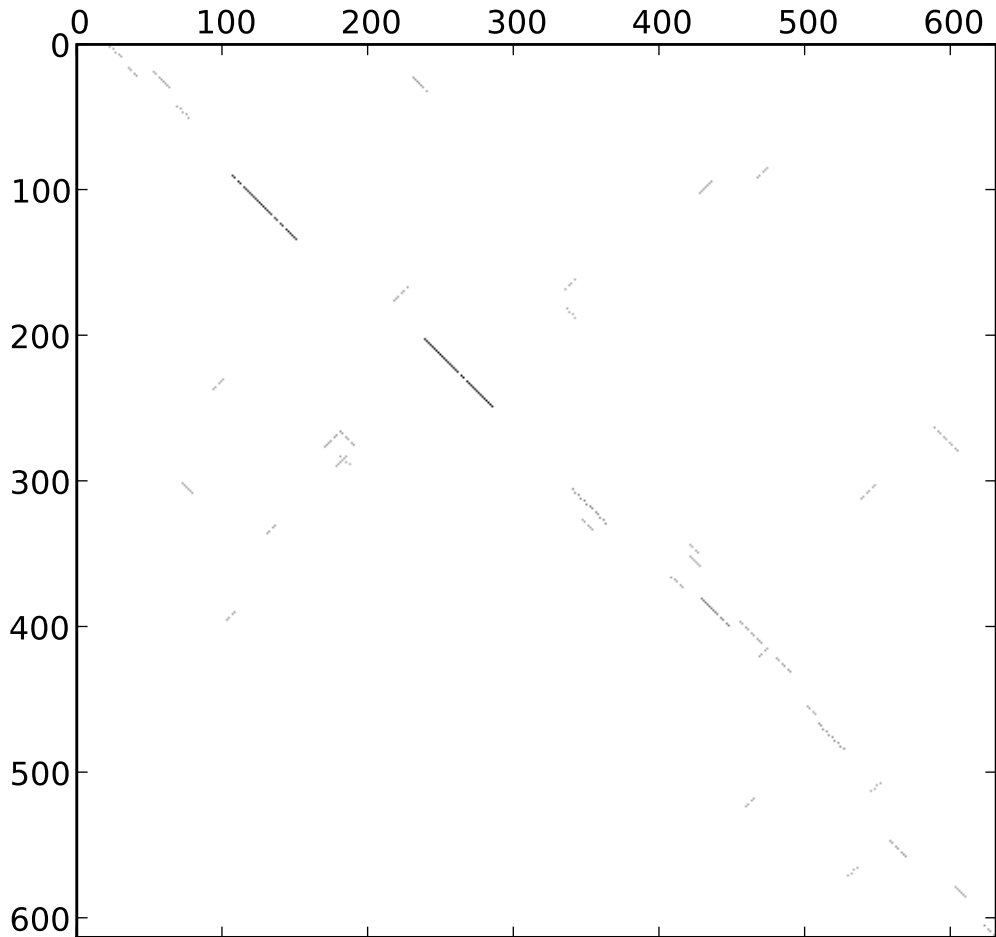

# MHE\_dmel\_dvir\_blastplot\_7\_rev\_normed

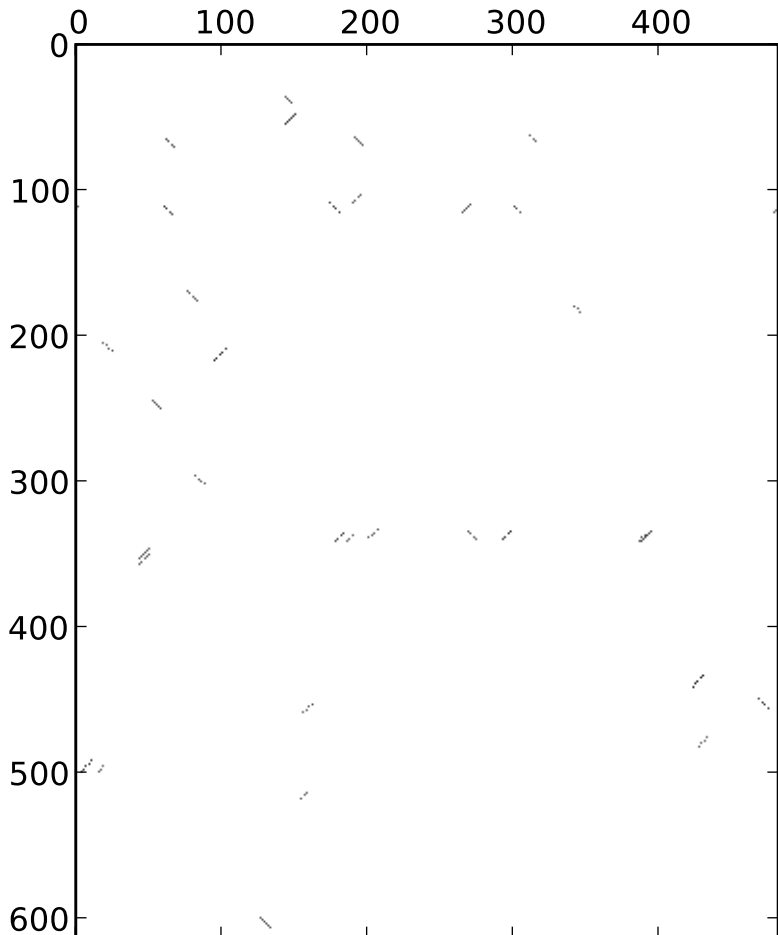

MHE\_dmel\_sepsis\_cynipsea\_blastplot\_7\_rev\_normed

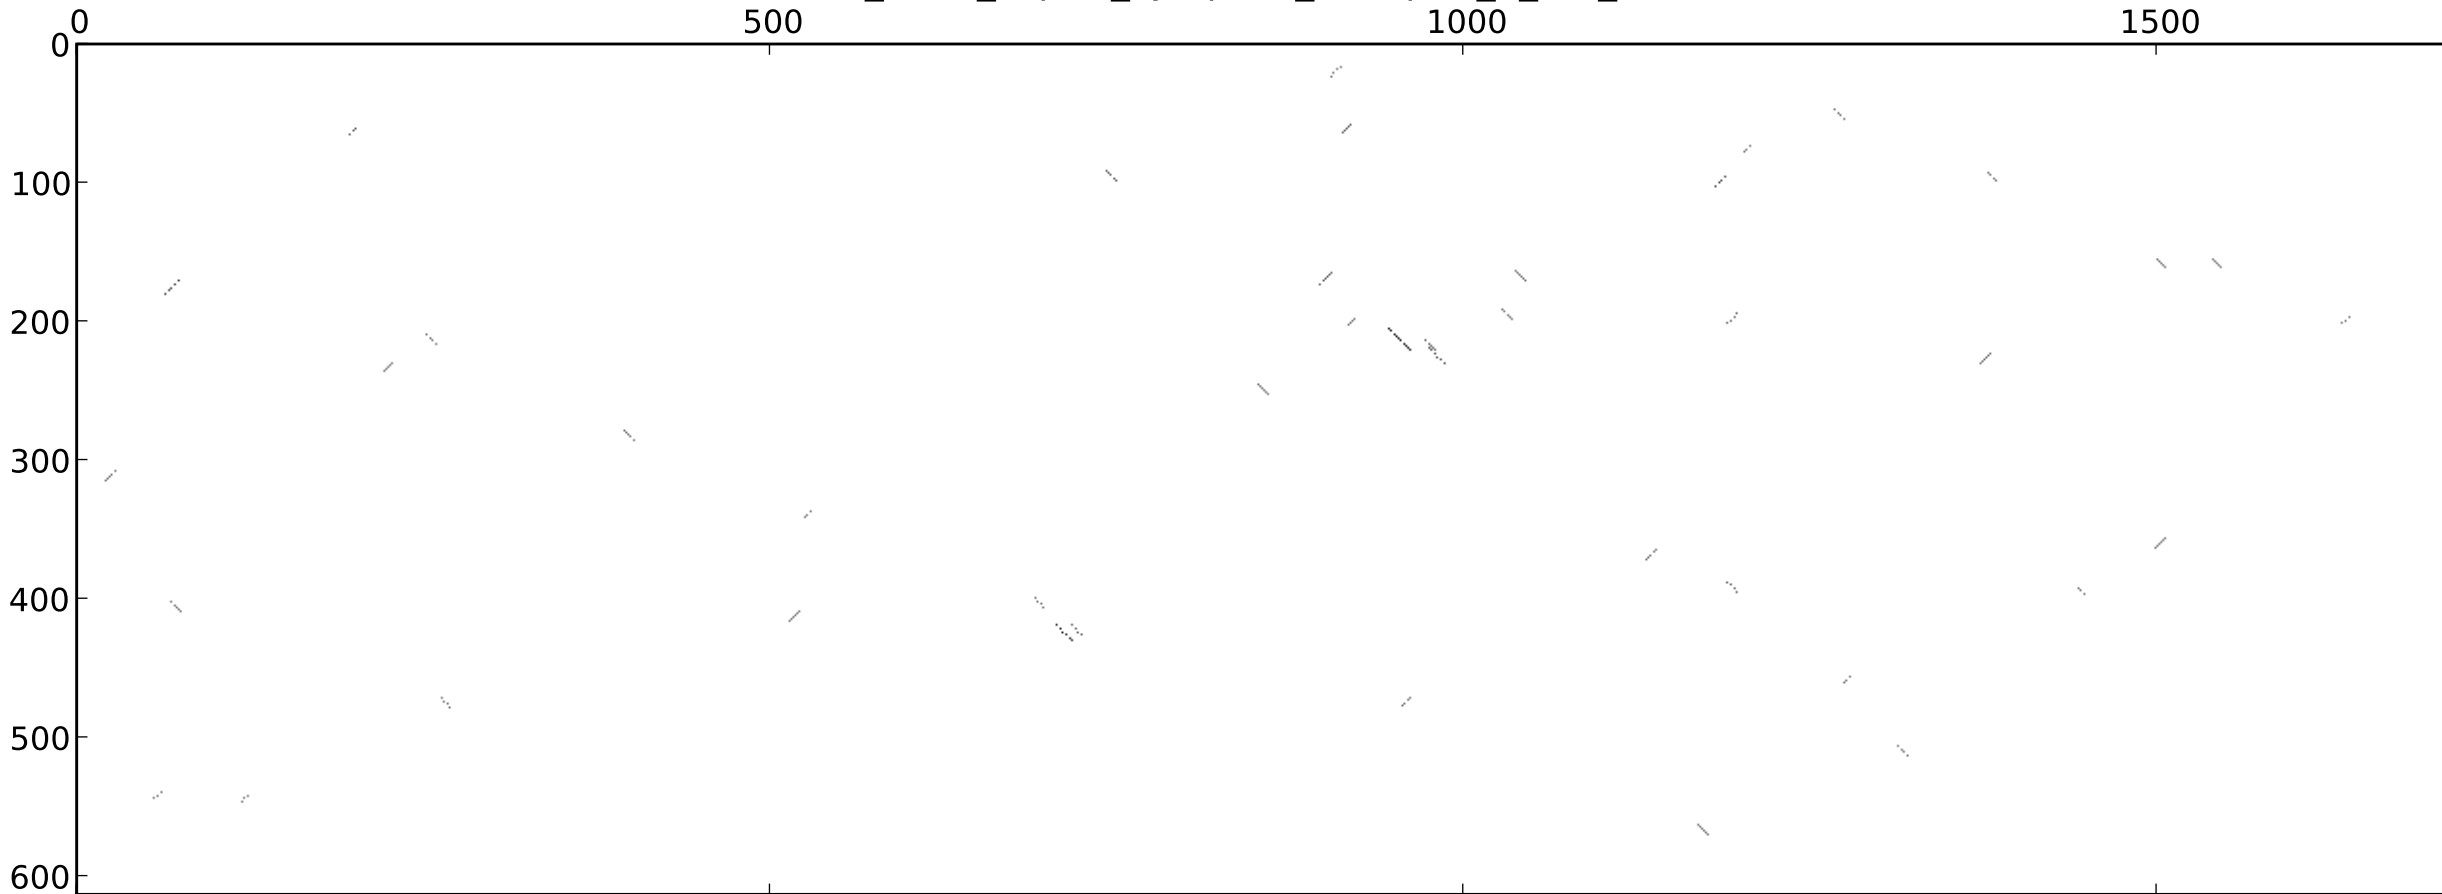

MHE\_dmel\_themira\_putris\_blastplot\_7\_rev\_normed

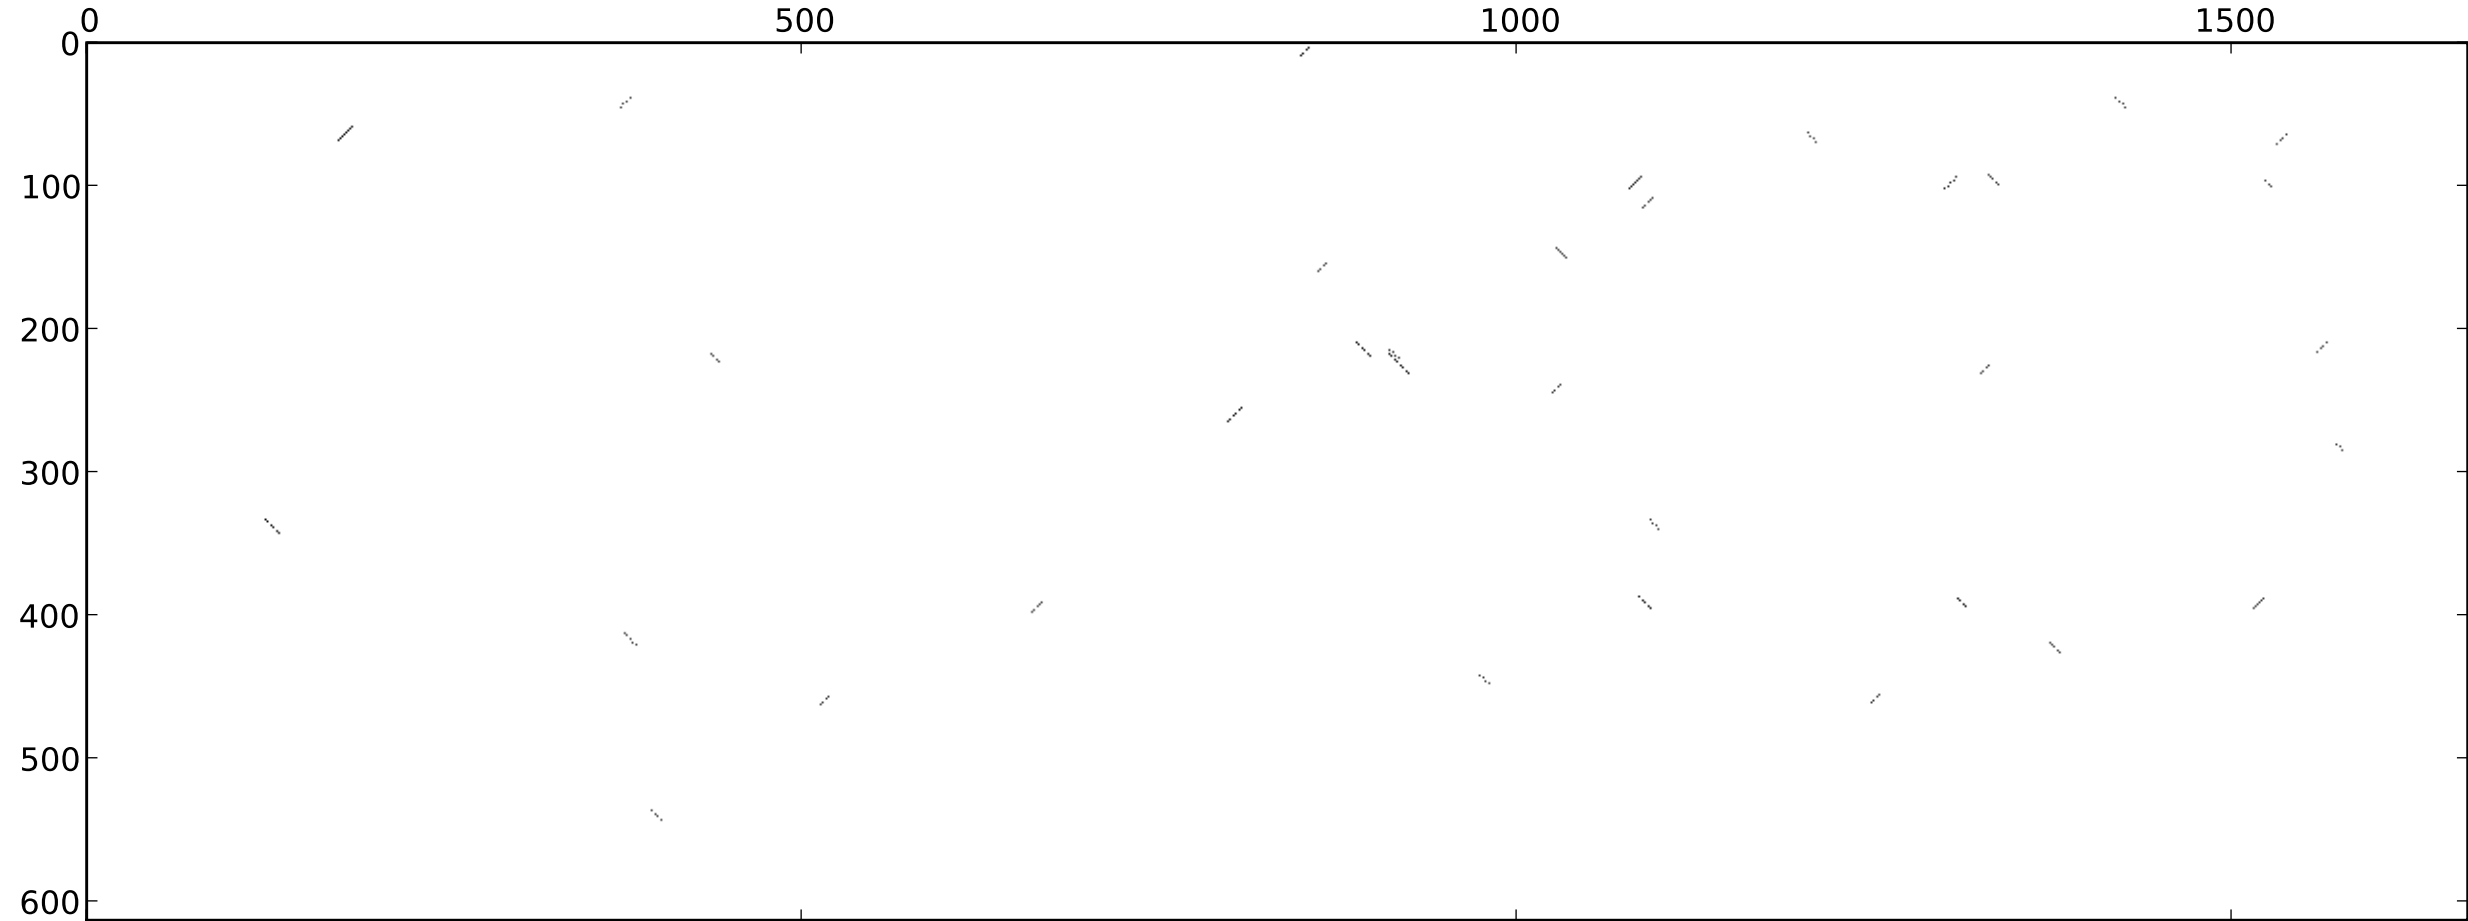



st2\_dmel\_dpse\_dotplot\_20-0.60\_rev\_normed\_extend

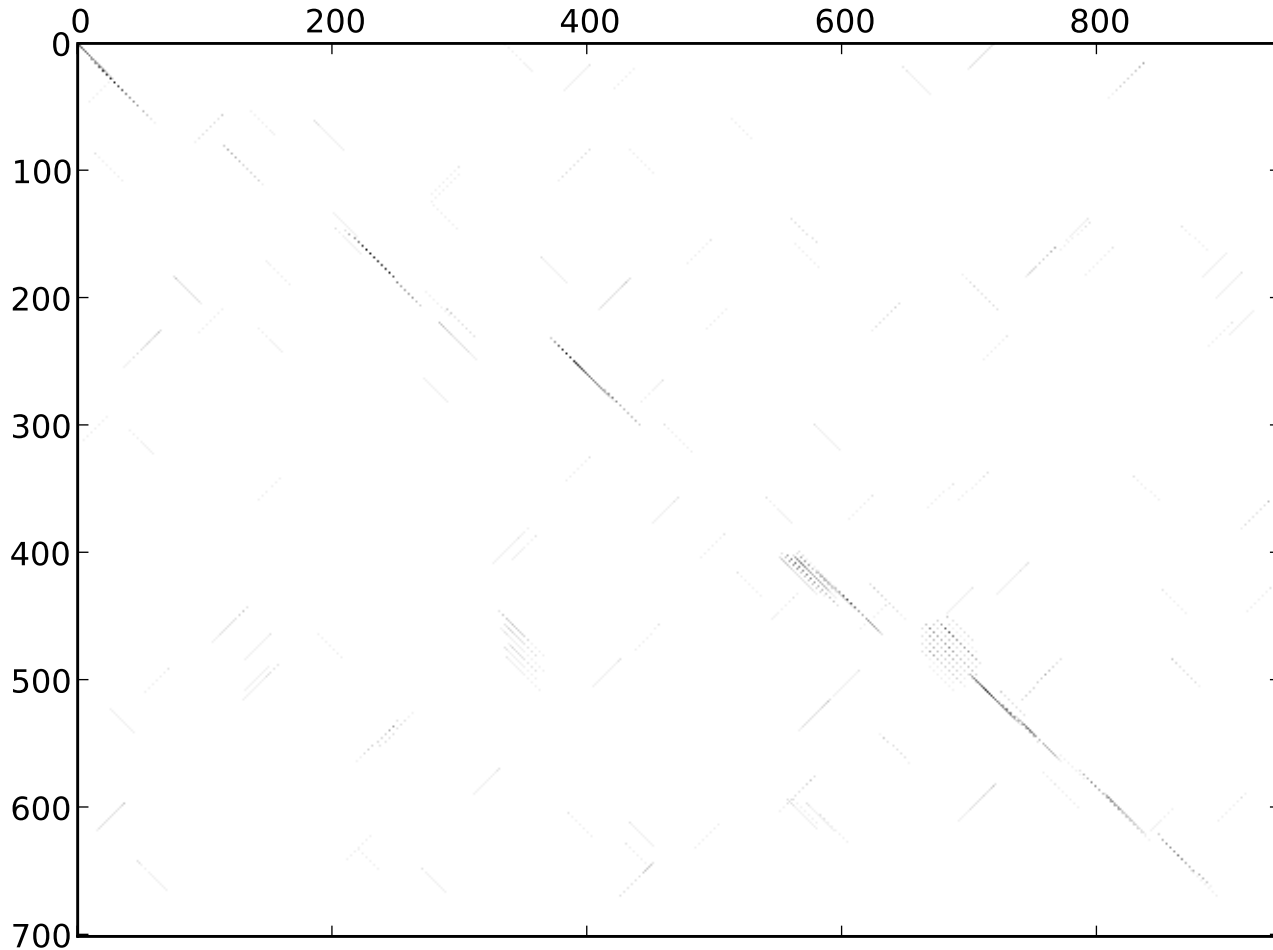

st2\_dmel\_dvir\_dotplot\_20-0.60\_rev\_normed\_extend

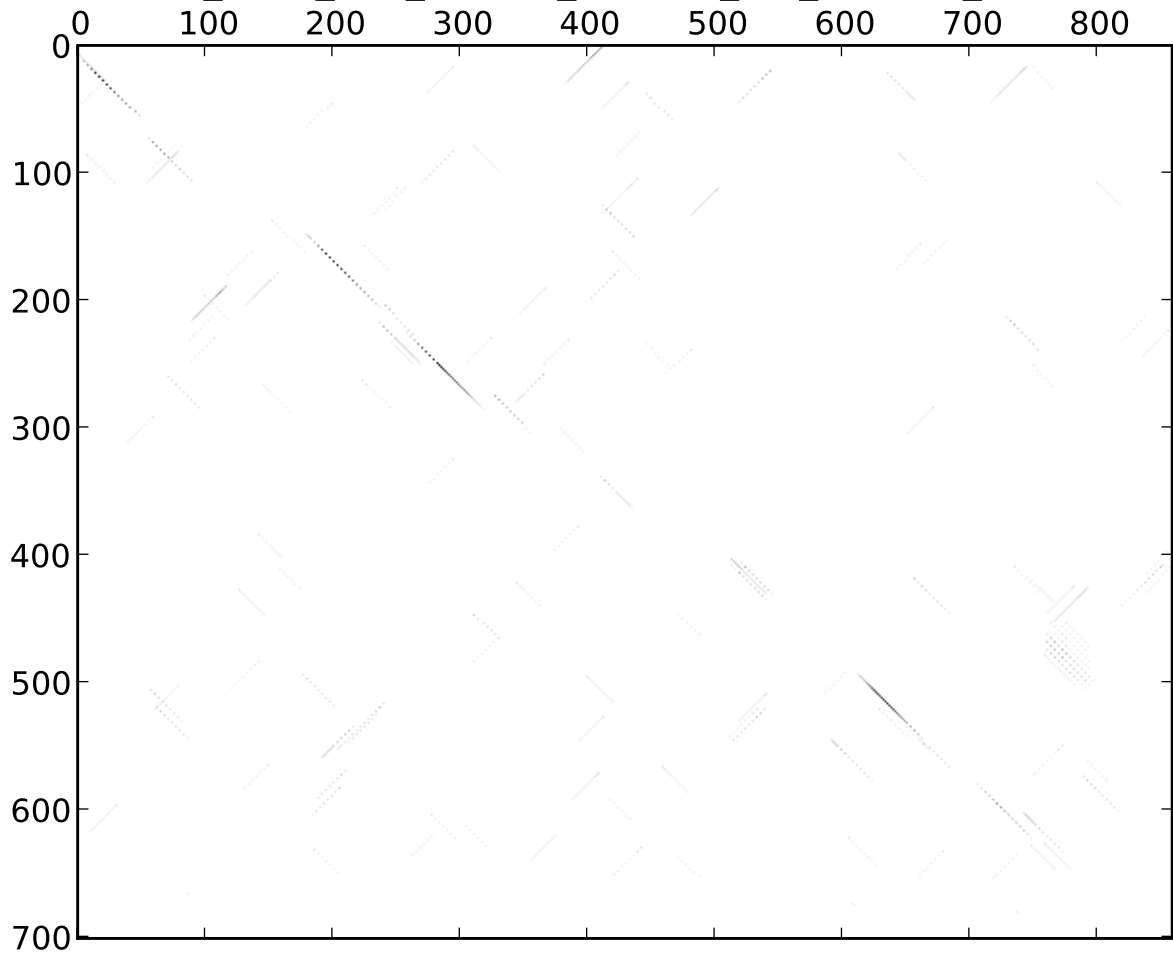

st2\_dmel\_sepsis\_cynipsea\_dotplot\_20-0.60\_rev\_normed\_extend

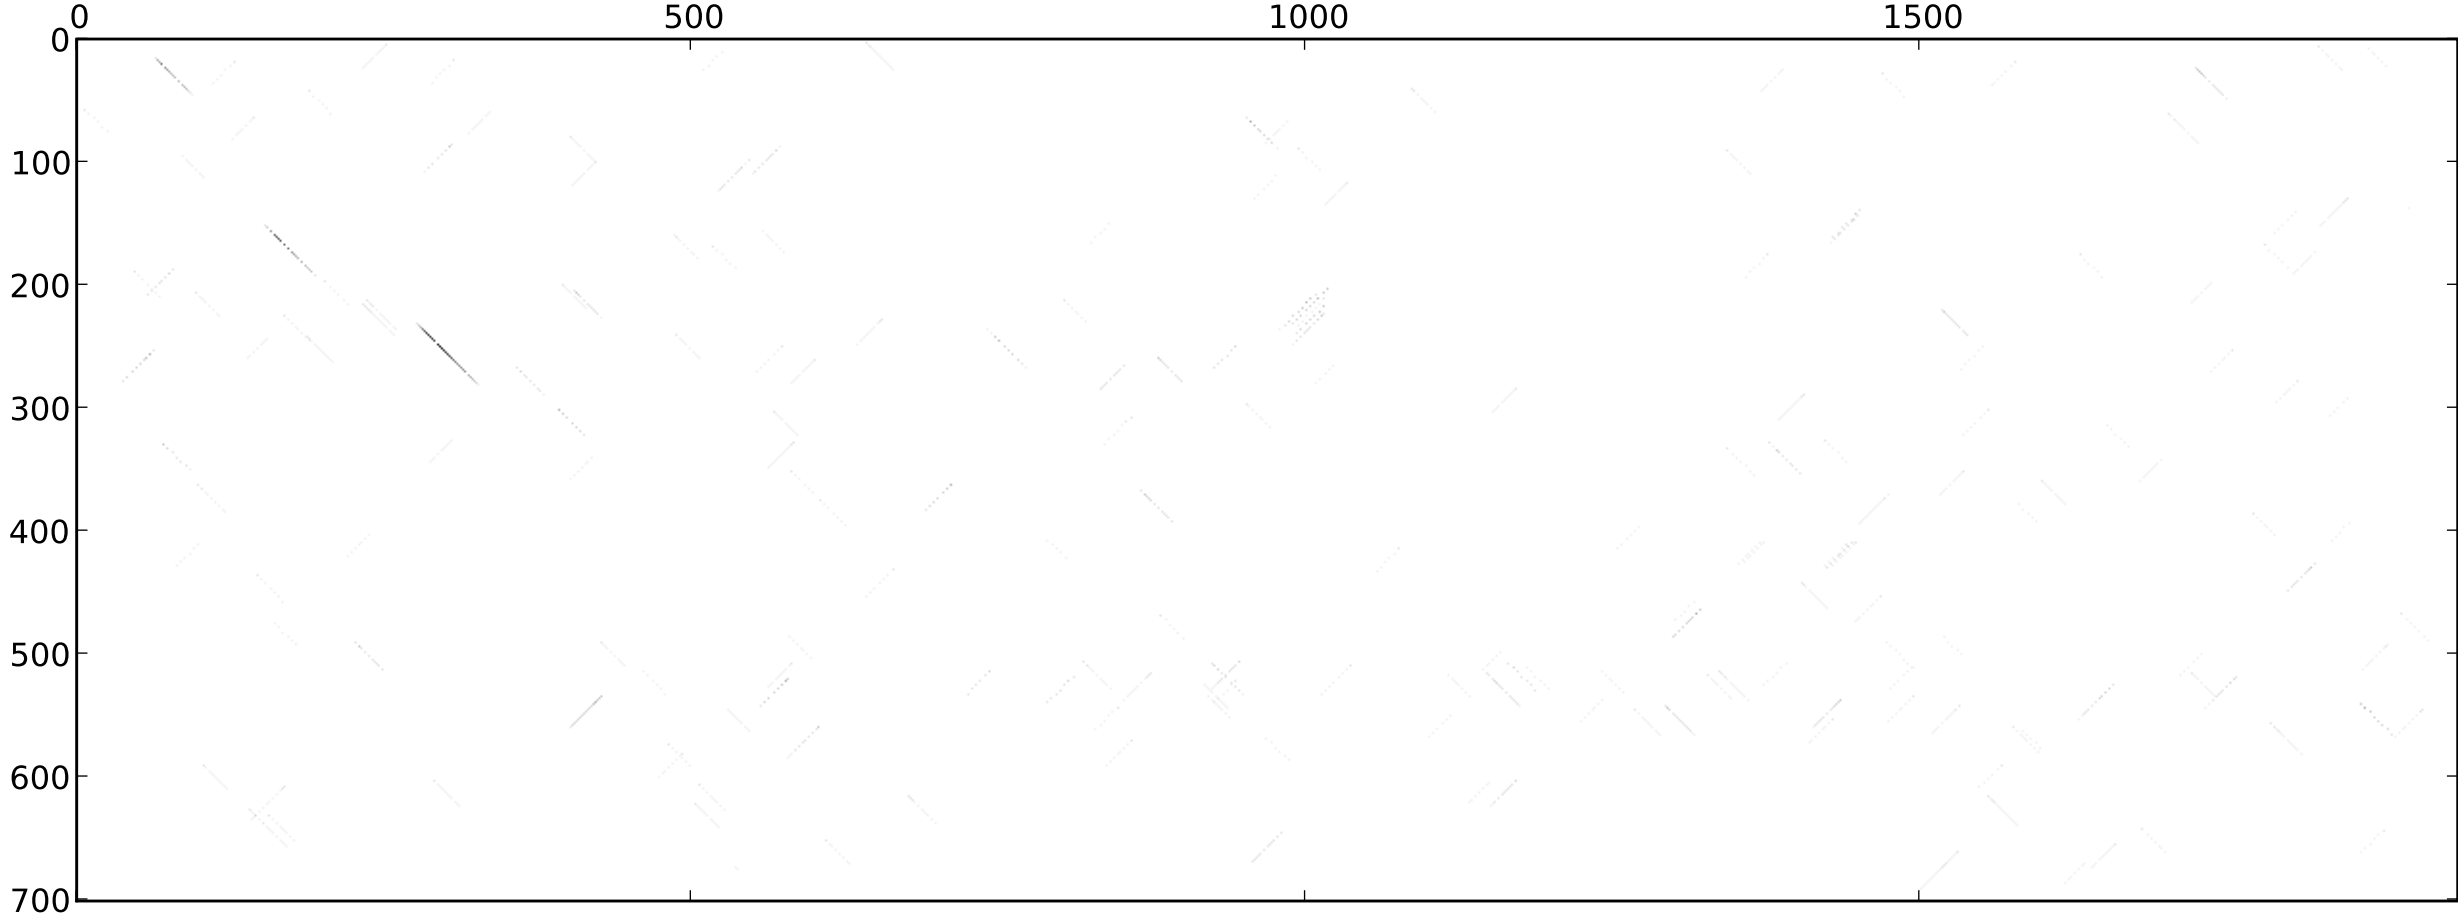

st2\_dmel\_themira\_putris\_dotplot\_20-0.60\_rev\_normed\_extend

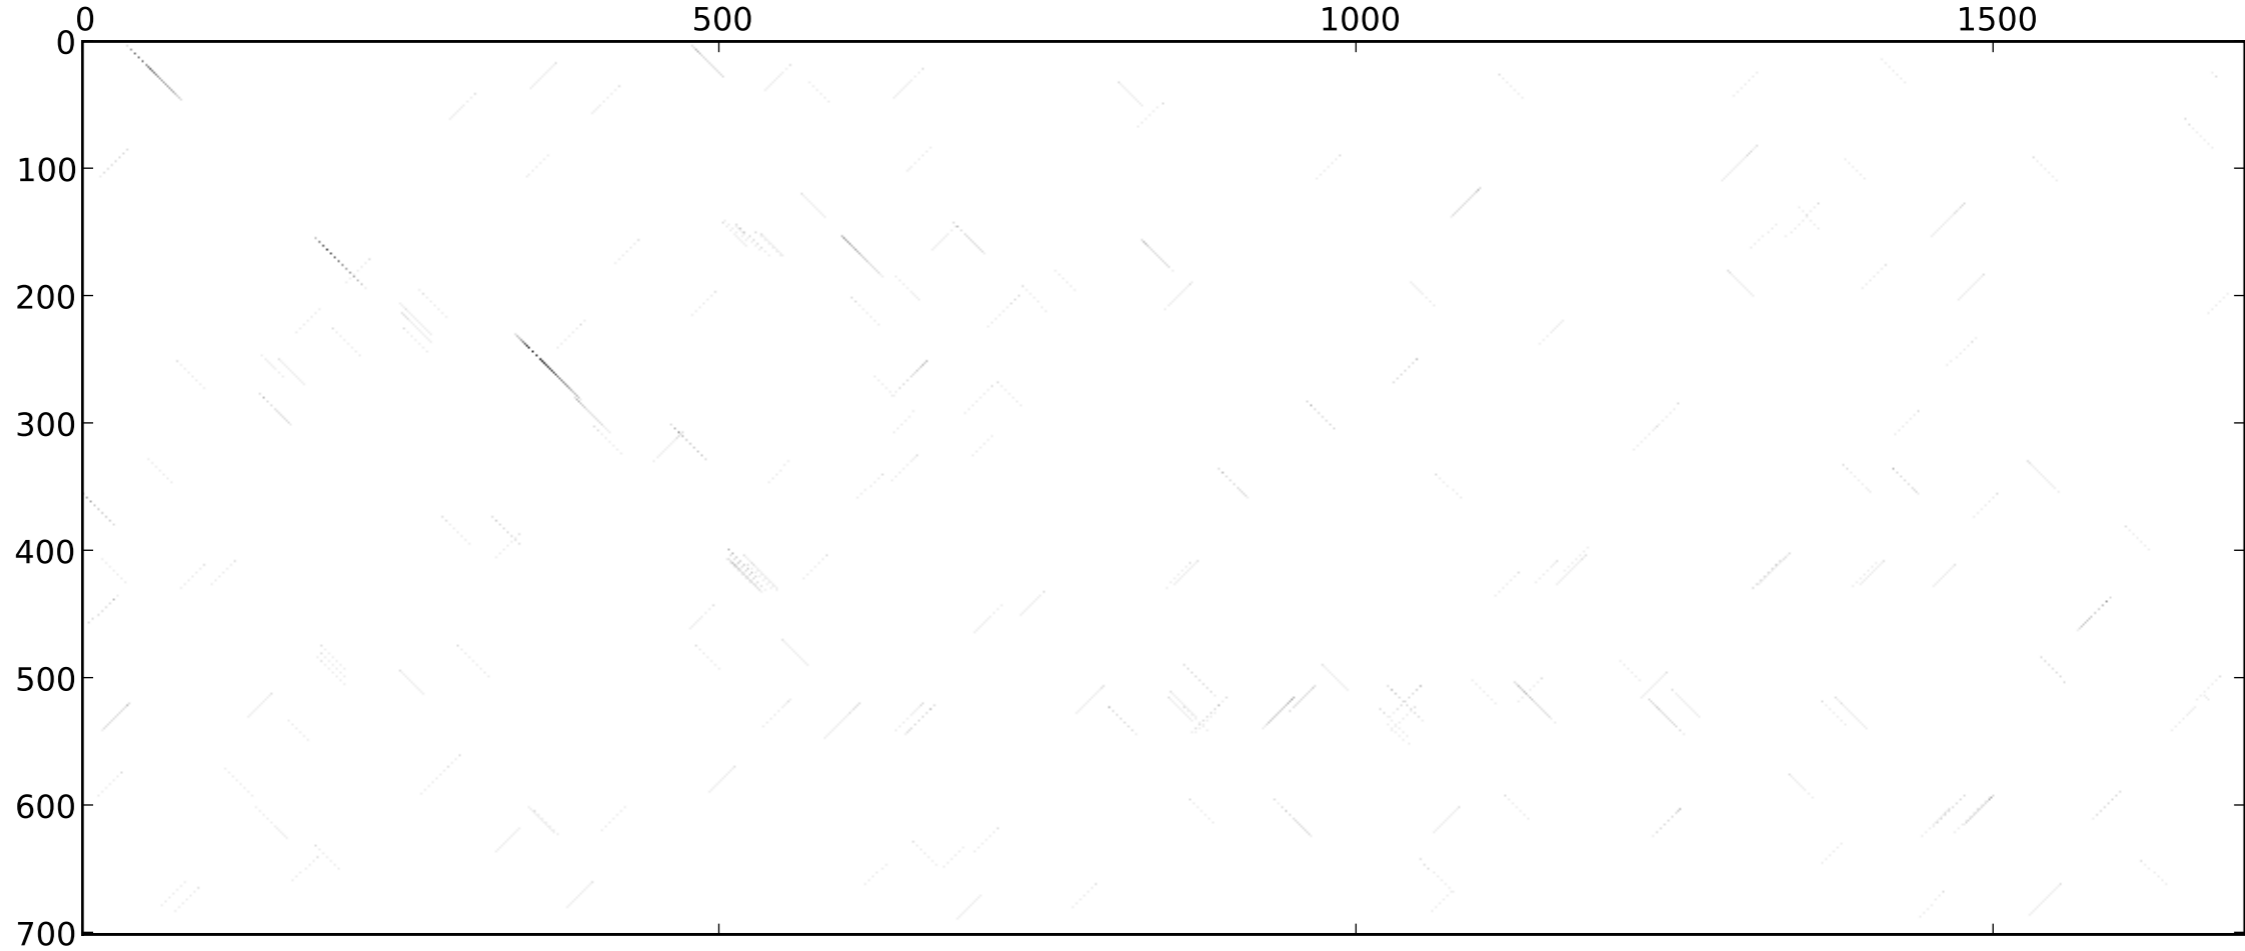

st37\_dmel\_dpse\_dotplot\_20-0.60\_rev\_normed\_extend

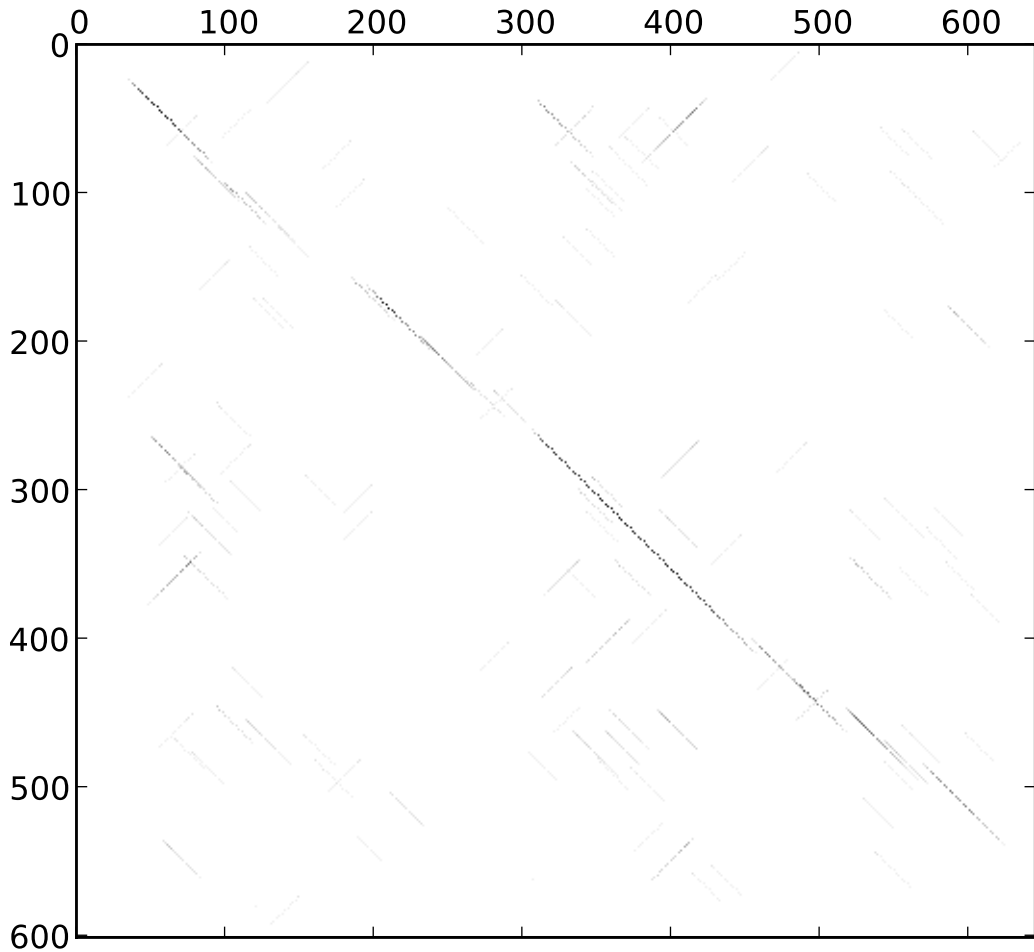

st37\_dmel\_dvir\_dotplot\_20-0.60\_rev\_normed\_extend

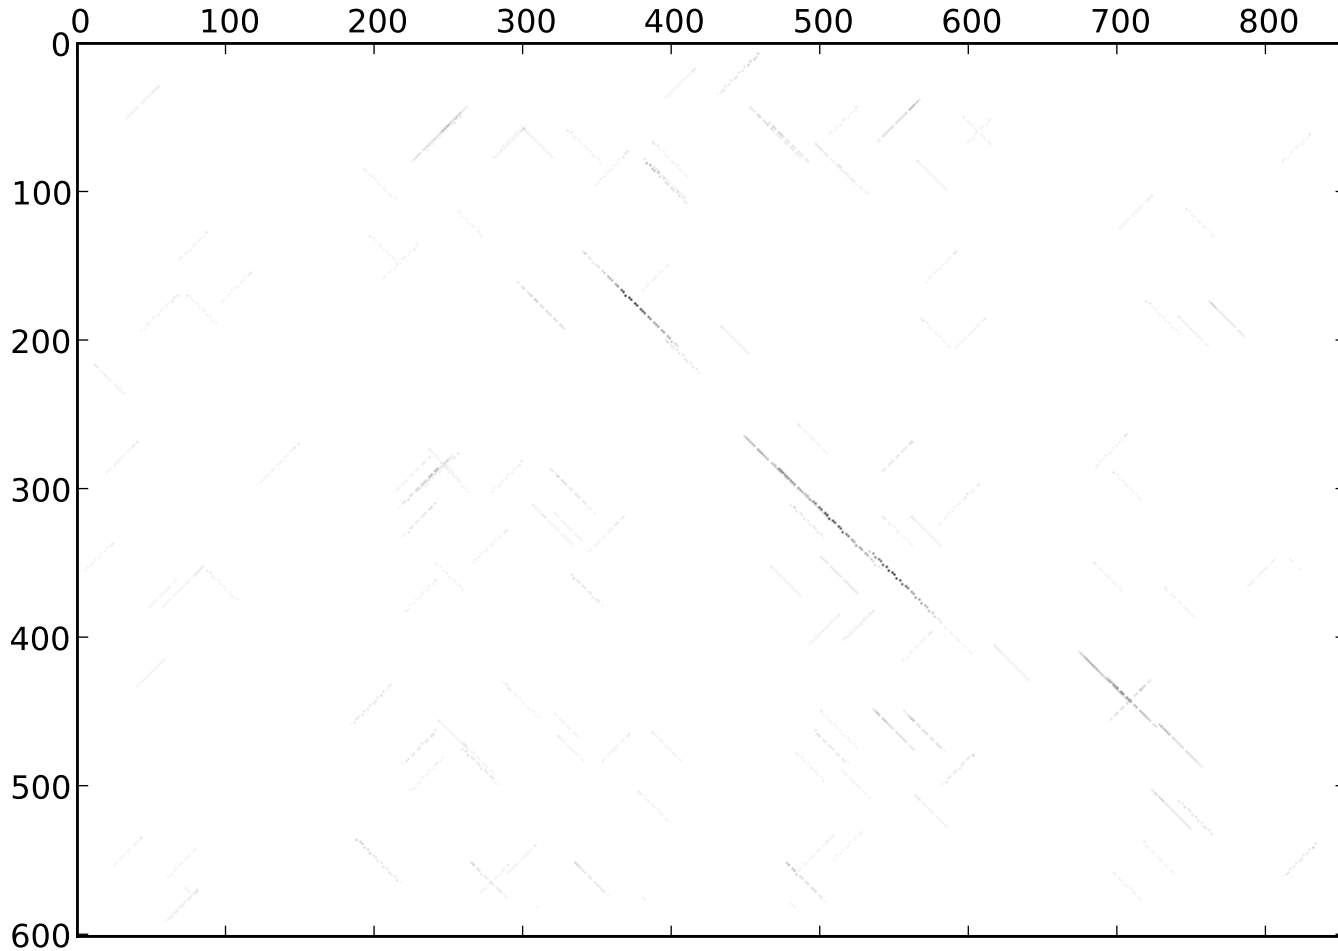

st37\_dmel\_sepsis\_cynipsea\_dotplot\_20-0.60\_rev\_normed\_extend

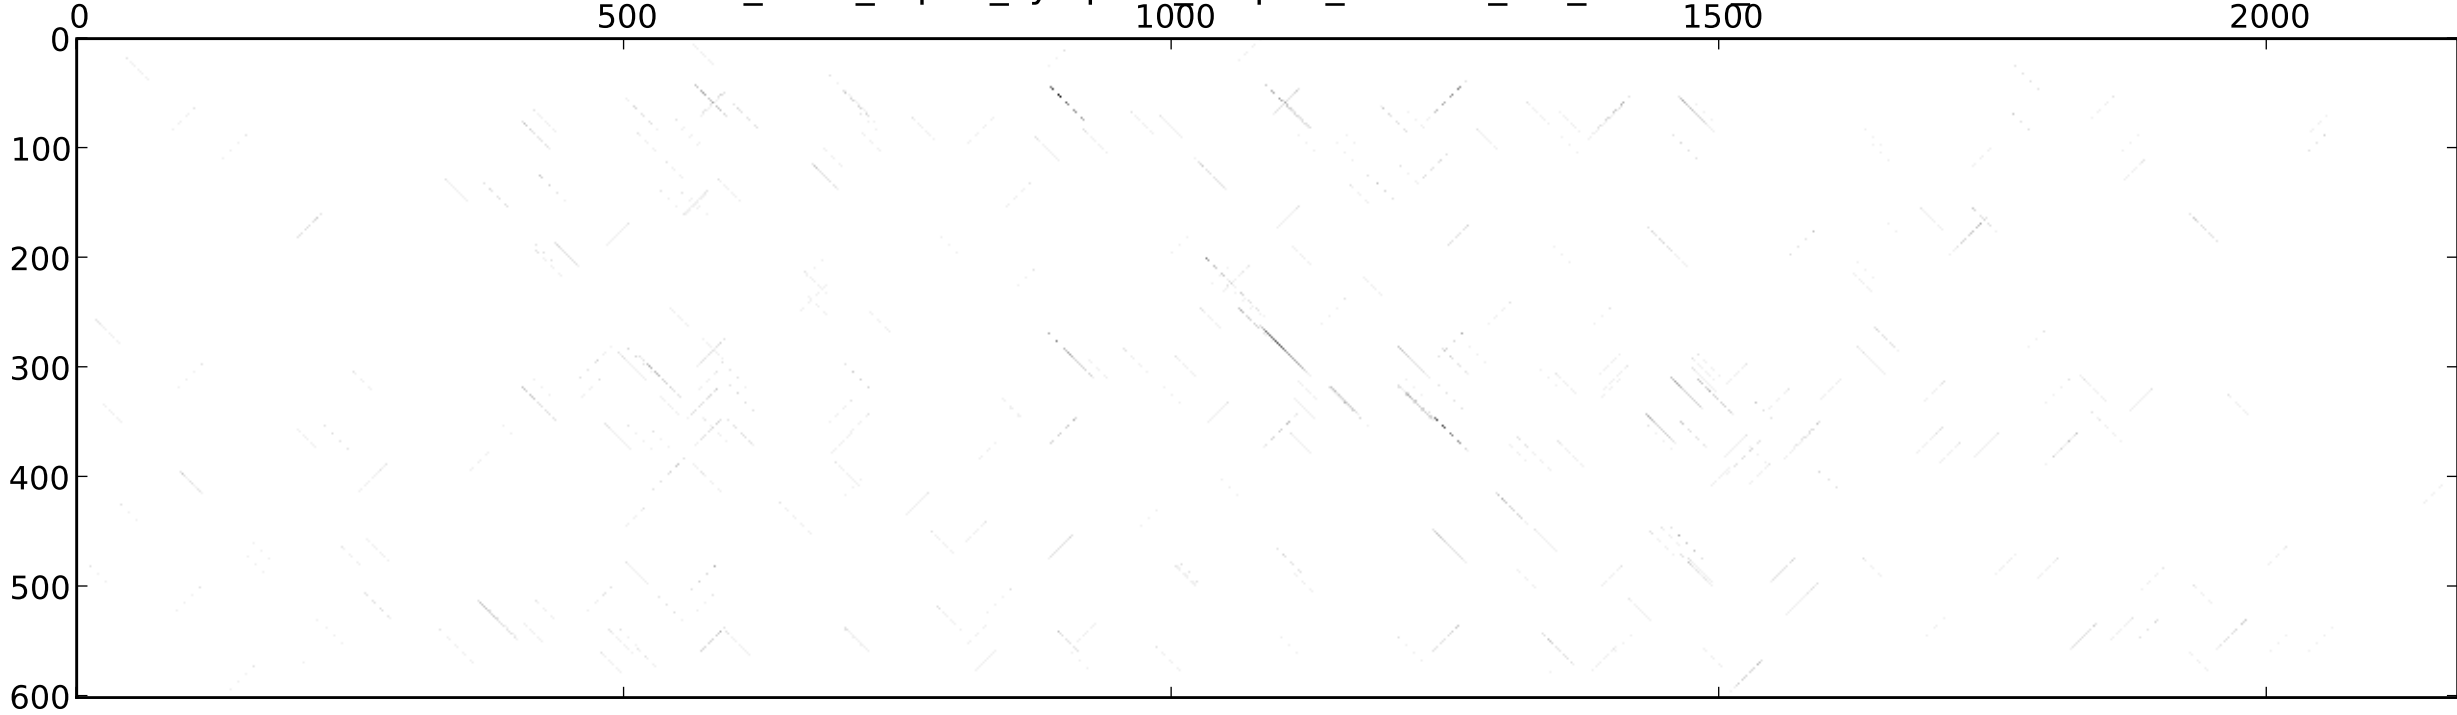

st37\_dmel\_themira\_putris\_dotplot\_20-0.60\_rev\_normed\_extend

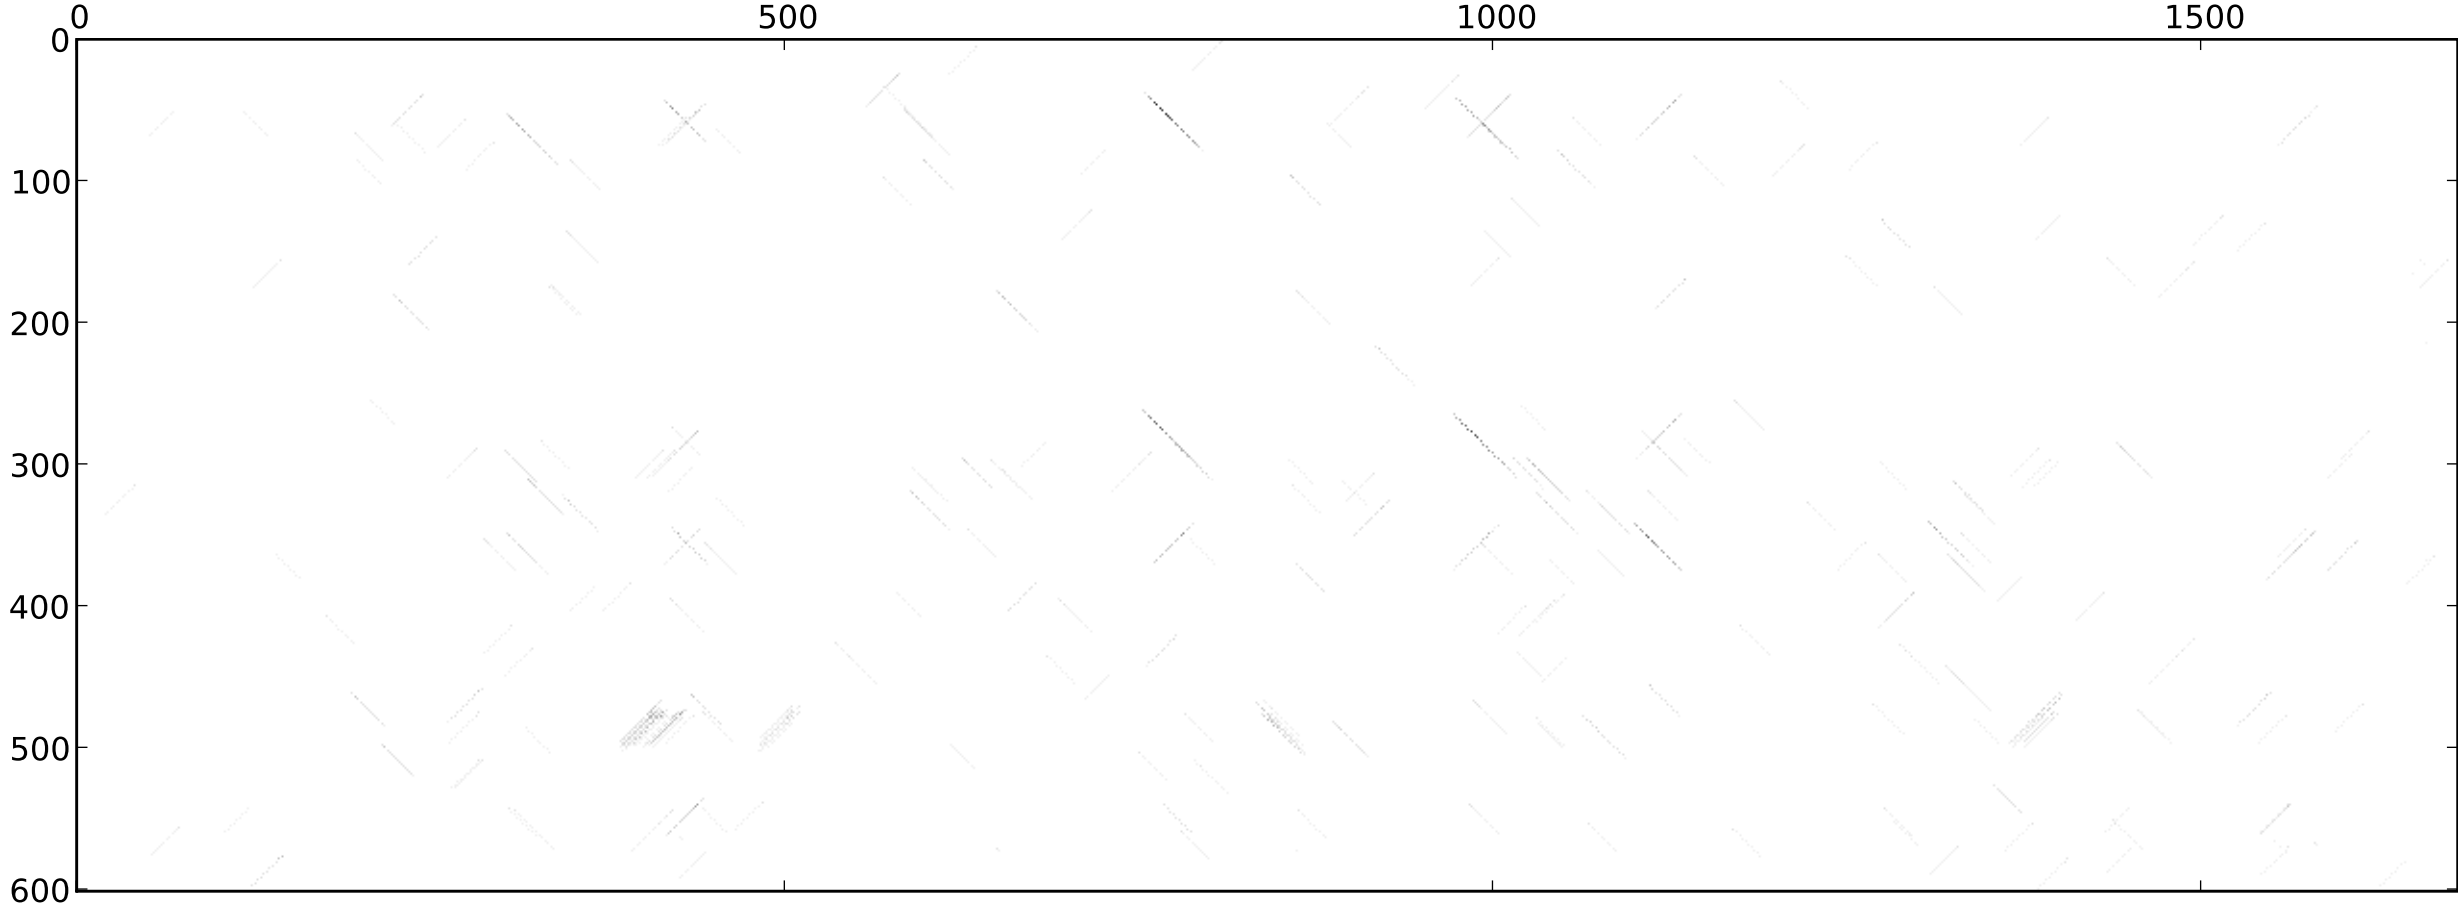



st46\_dmel\_dpse\_dotplot\_20-0.60\_rev\_normed\_extend

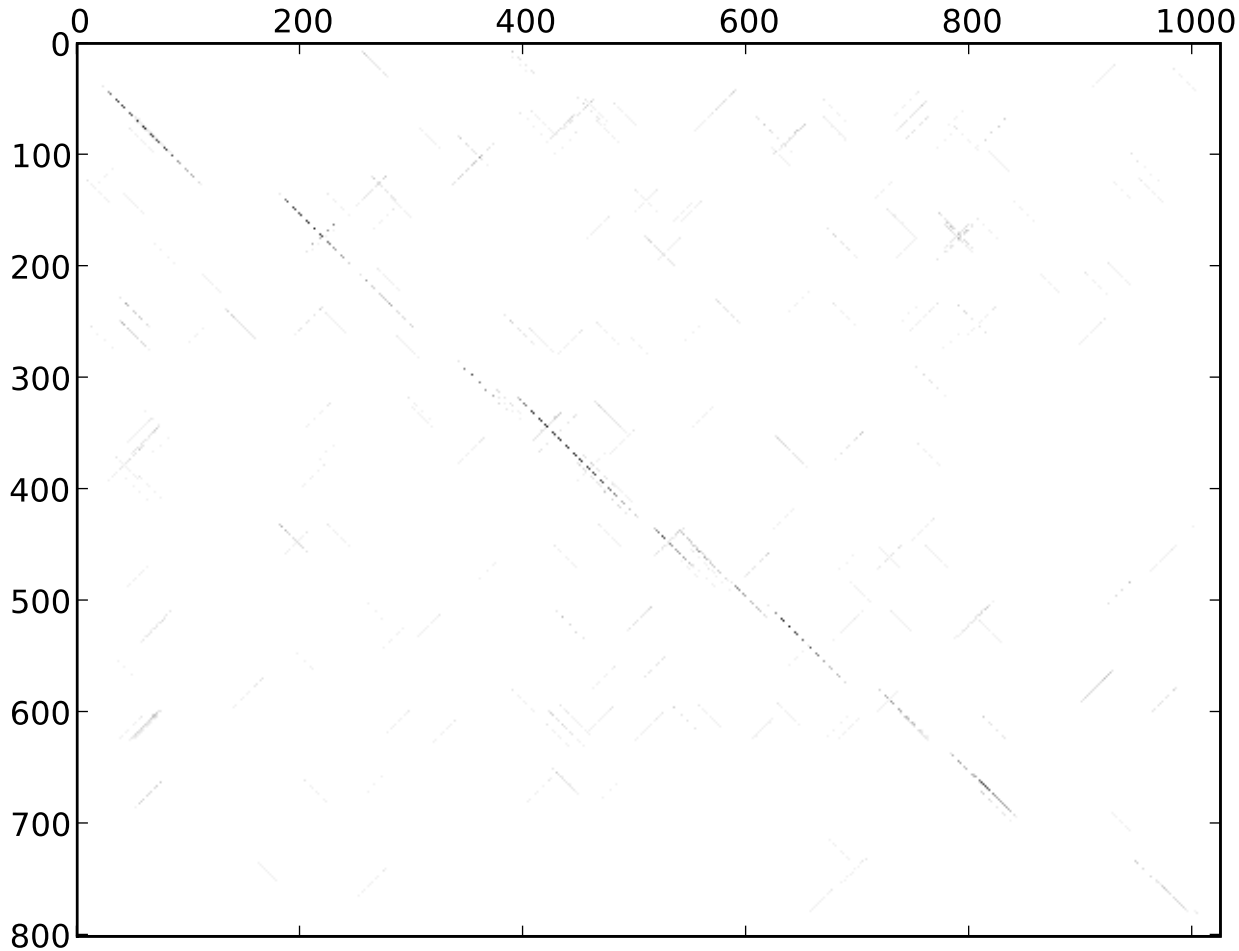

st46\_dmel\_dvir\_dotplot\_20-0.60\_rev\_normed\_extend

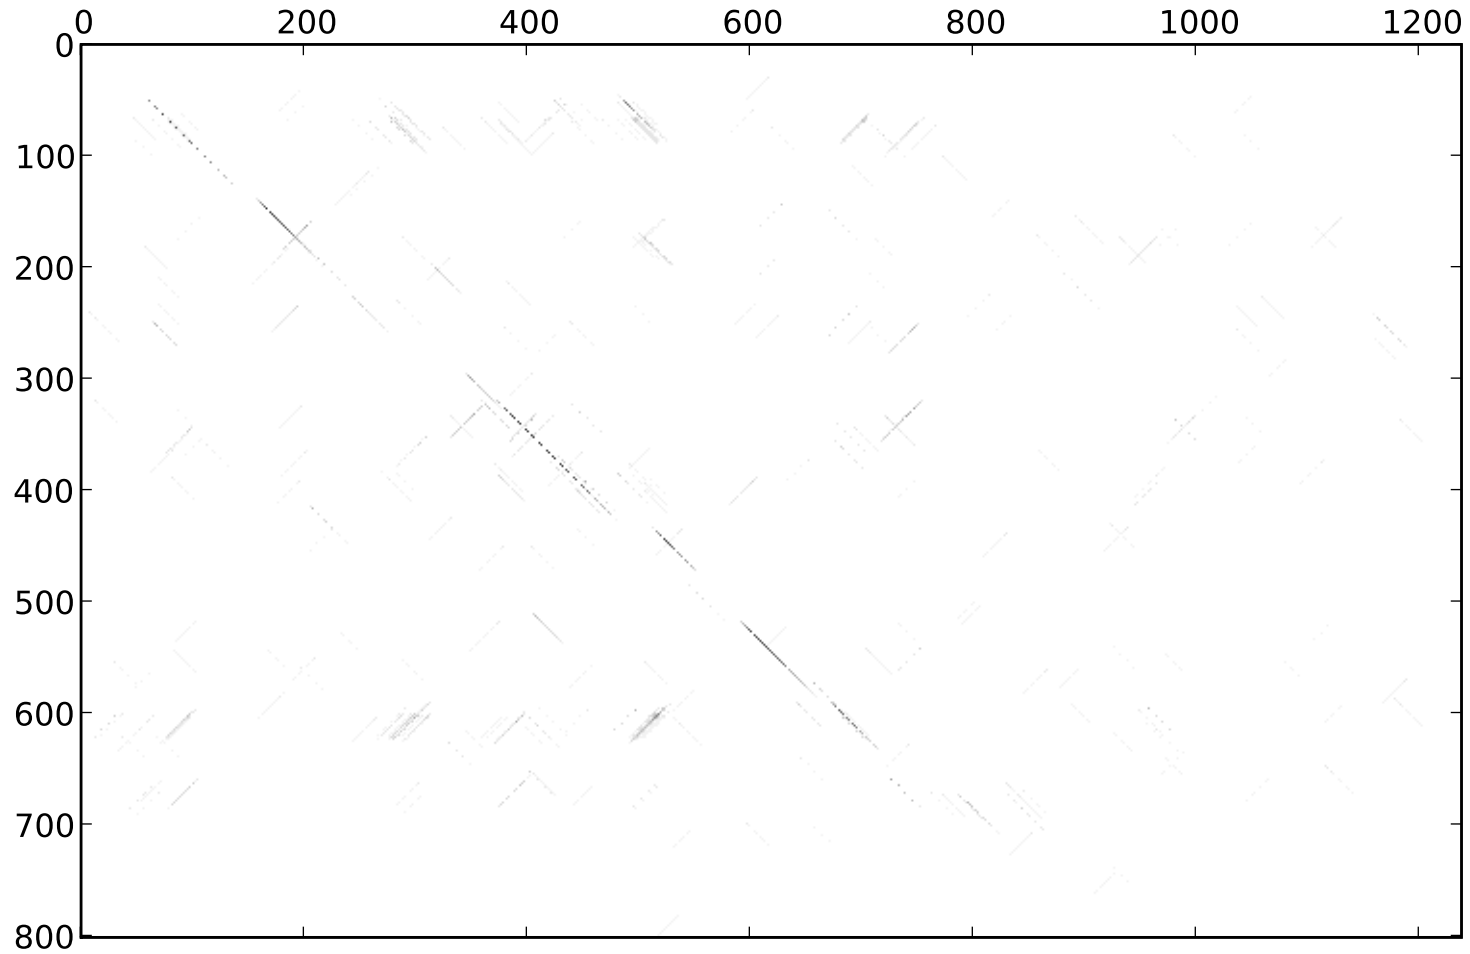

st46\_dmel\_sepsis\_cynipsea\_dotplot\_20-0.60\_rev\_normed\_extend

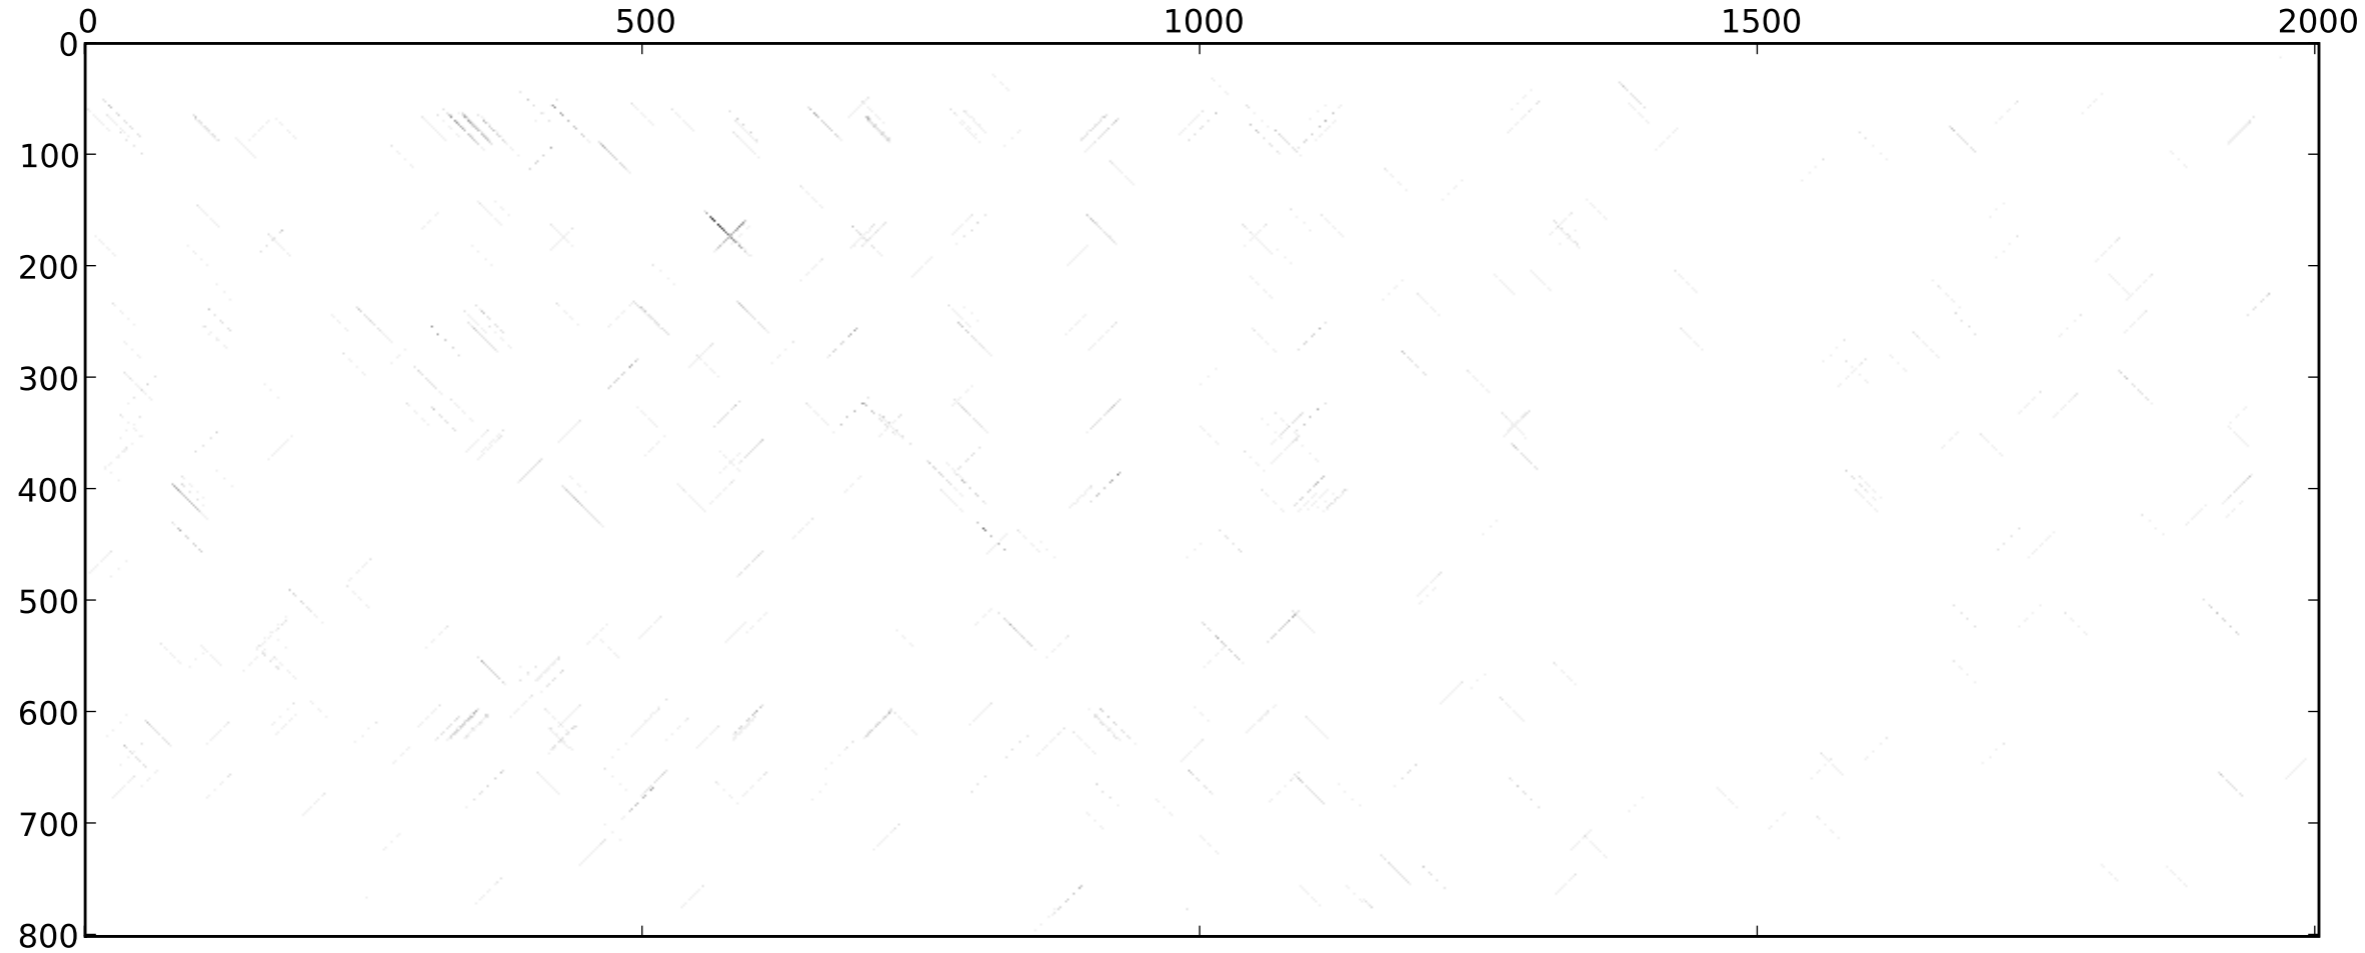

st46\_dmel\_themira\_putris\_dotplot\_20-0.60\_rev\_normed\_extend

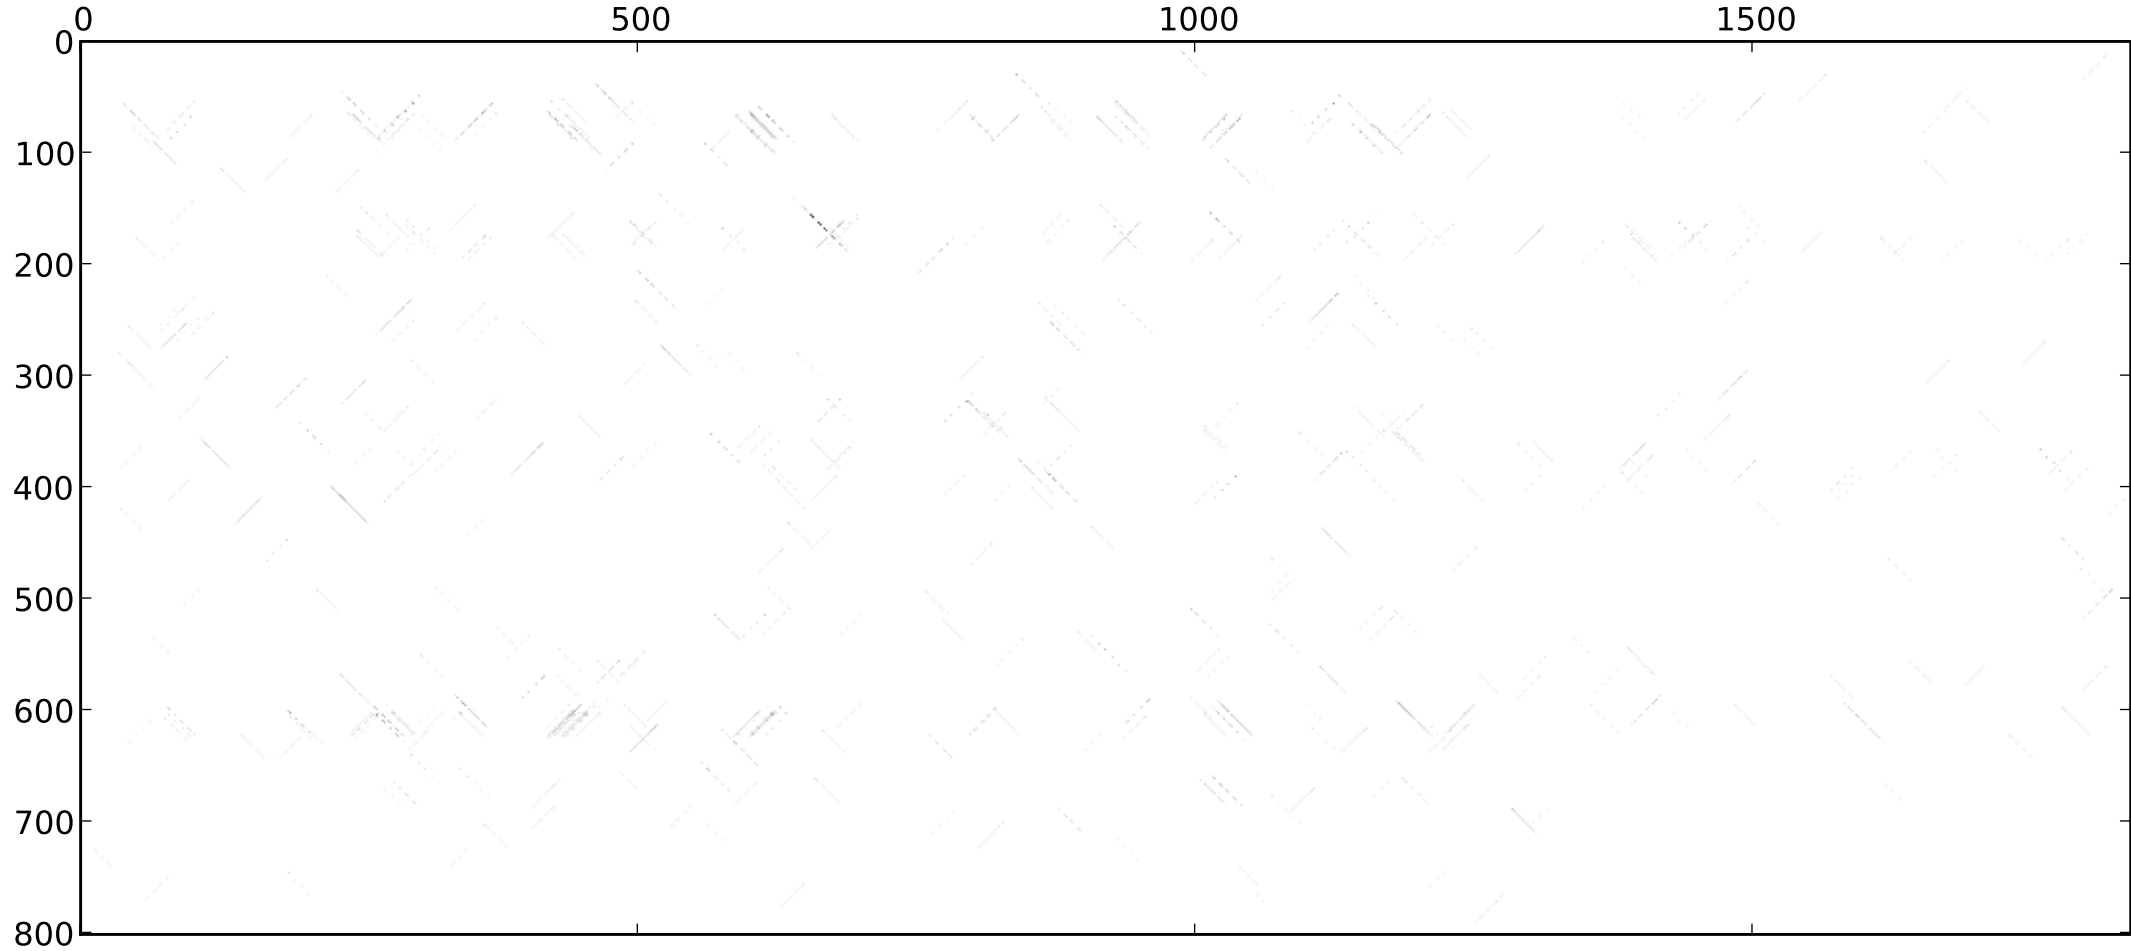

MHE\_dmel\_dpse\_dotplot\_20-0.60\_rev\_normed\_extend

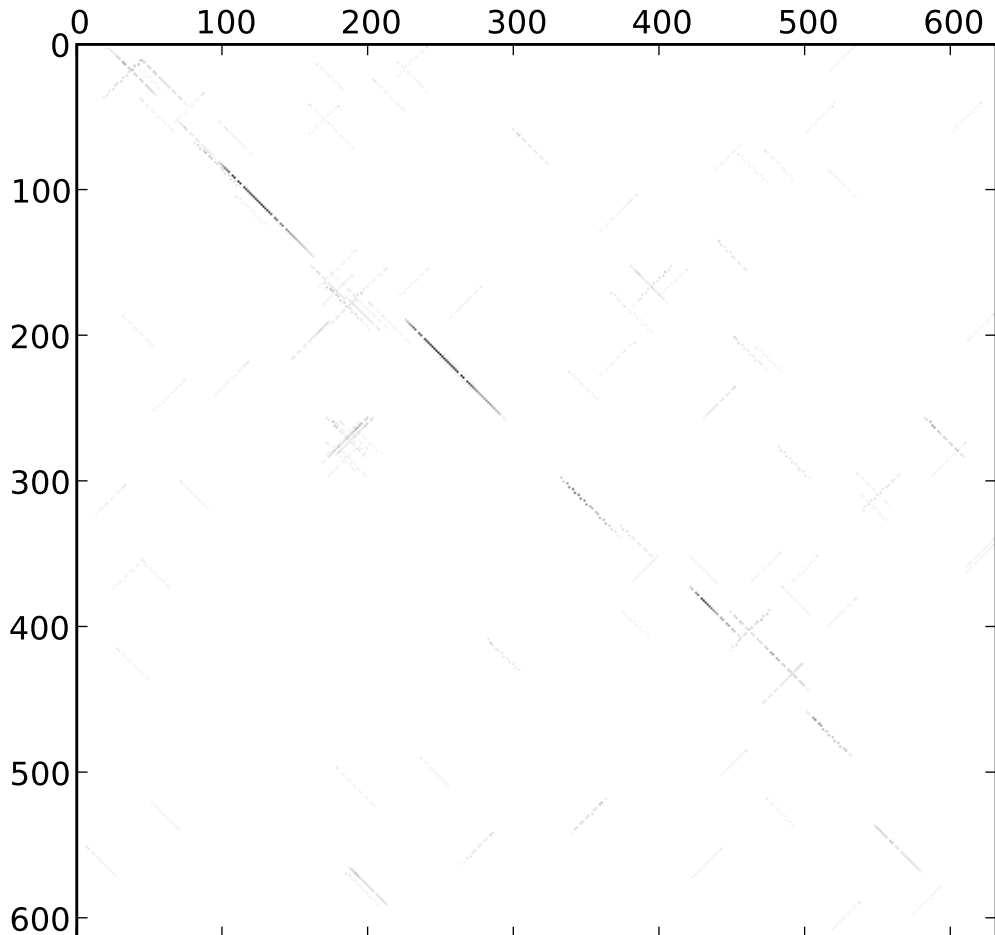

MHE\_dmel\_dvir\_dotplot\_20-0.60\_rev\_normed\_ex

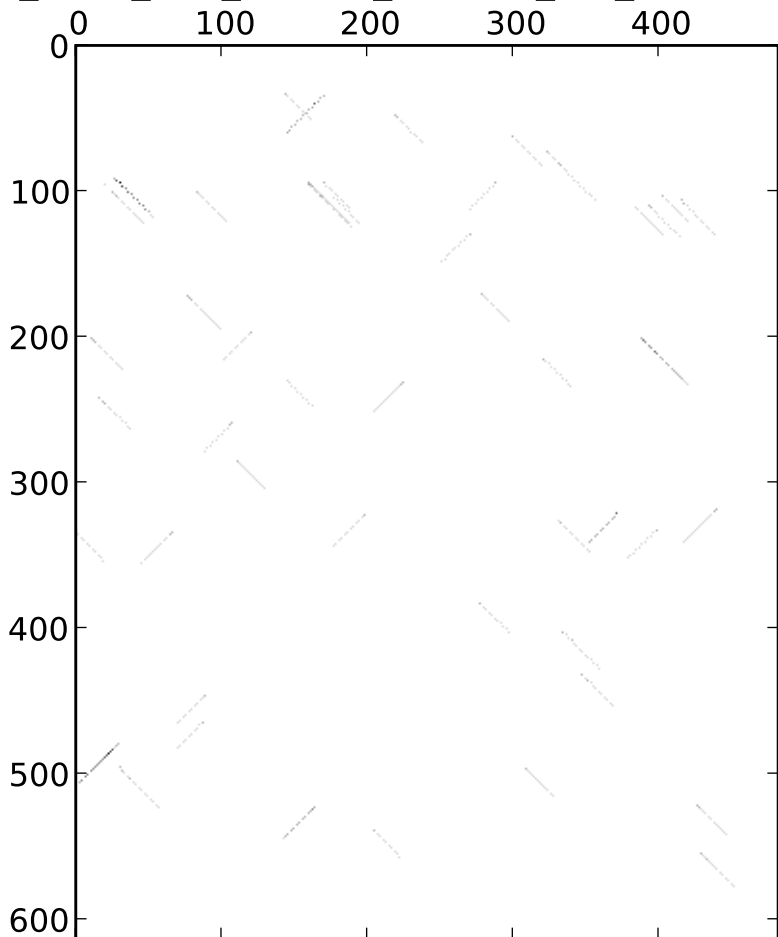

MHE\_dmel\_sepsis\_cynipsea\_dotplot\_20-0.60\_rev\_normed\_extend

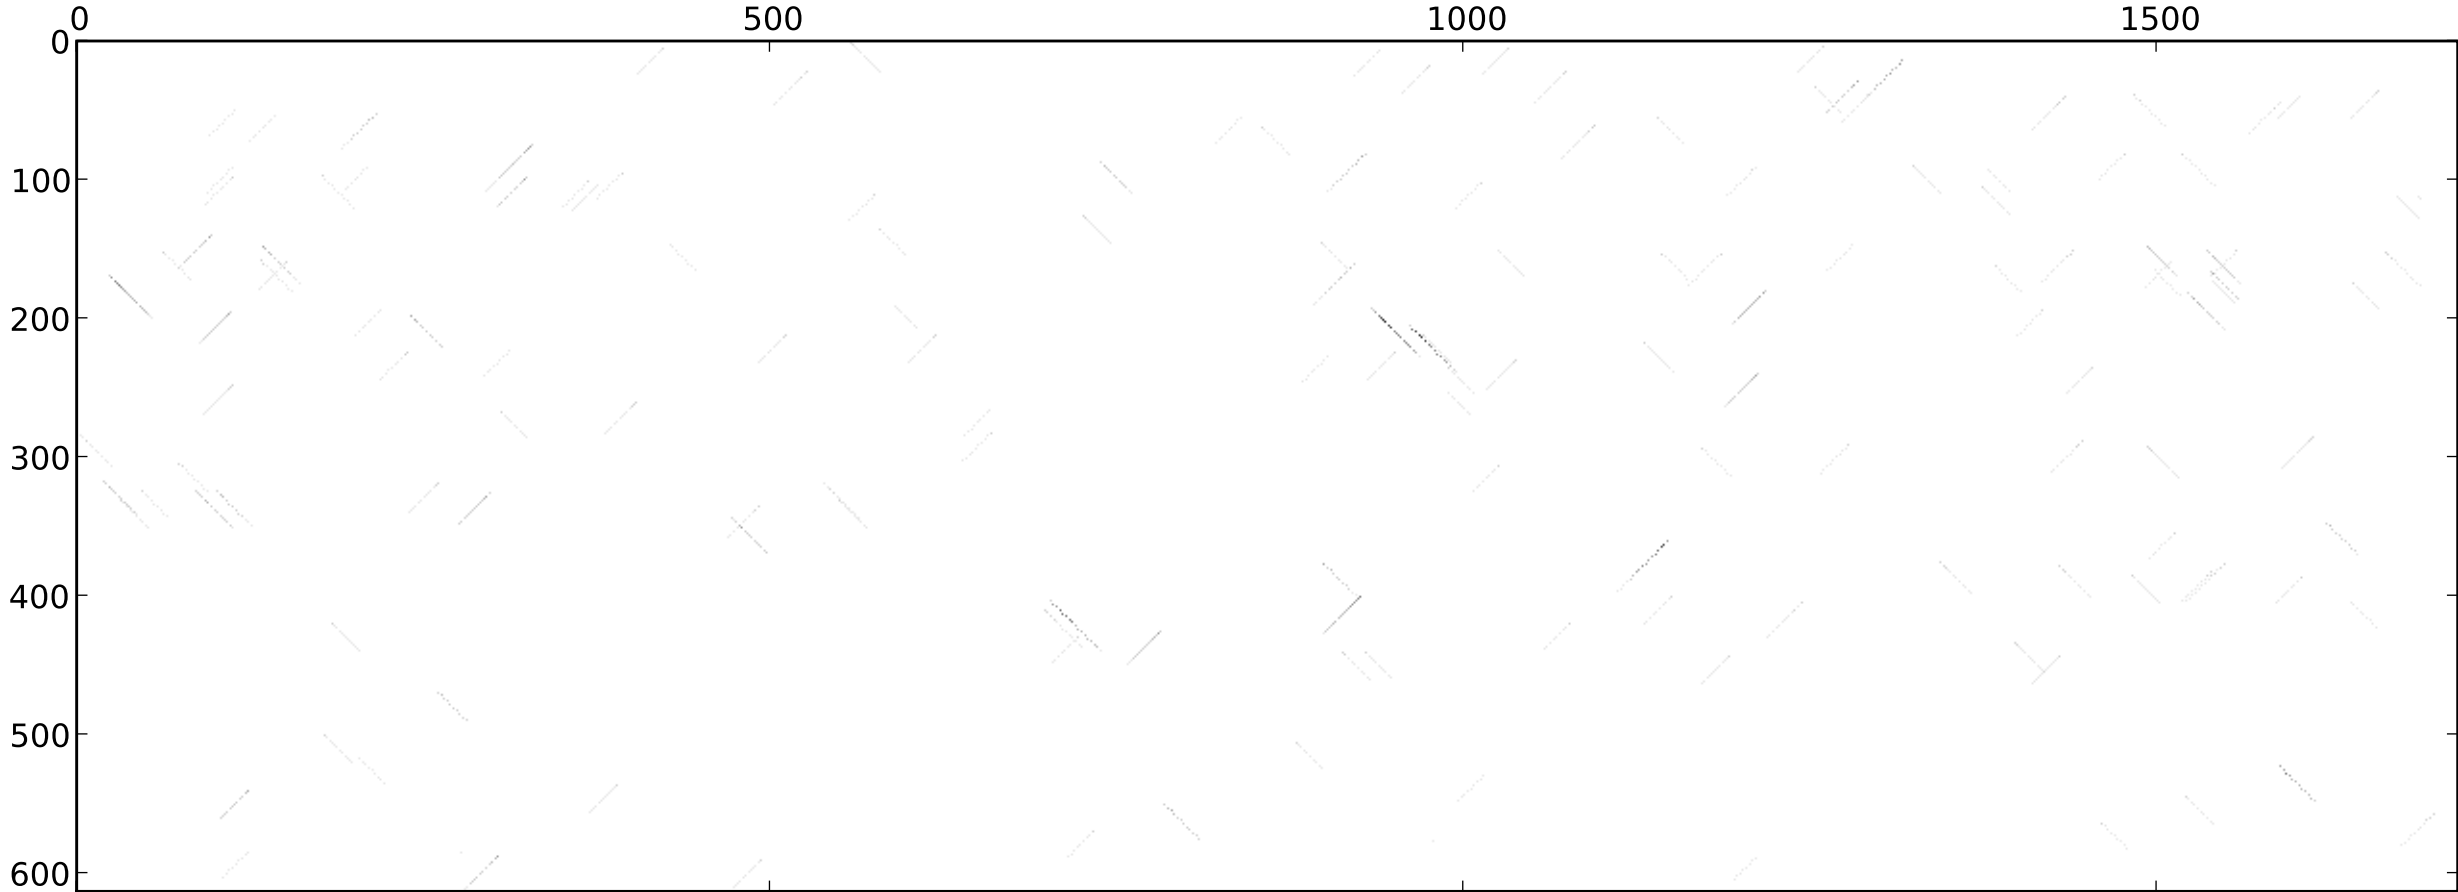

MHE\_dmel\_themira\_putris\_dotplot\_20-0.60\_rev\_normed\_extend

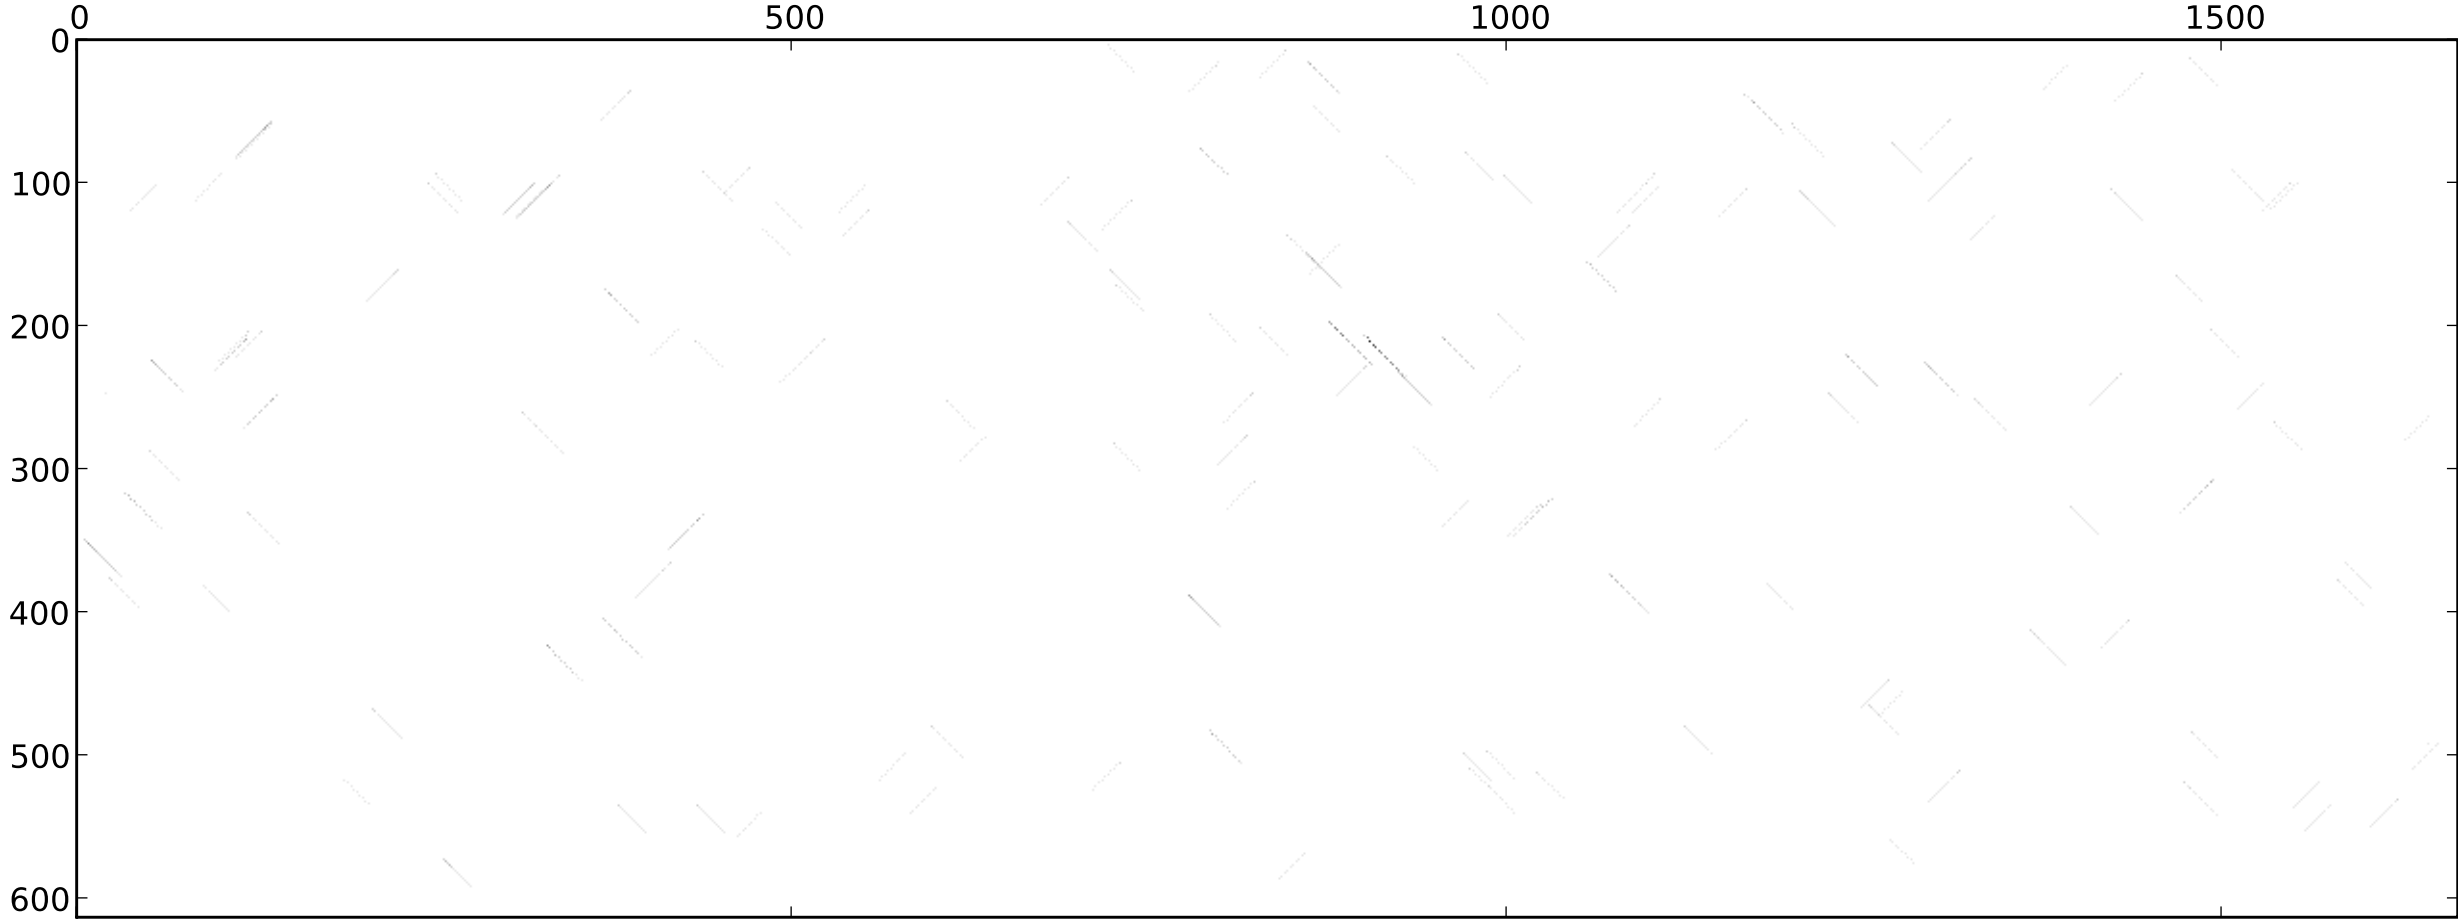



st2\_dmel\_dpse\_dotplot\_14-0.60\_rev\_normed\_extend

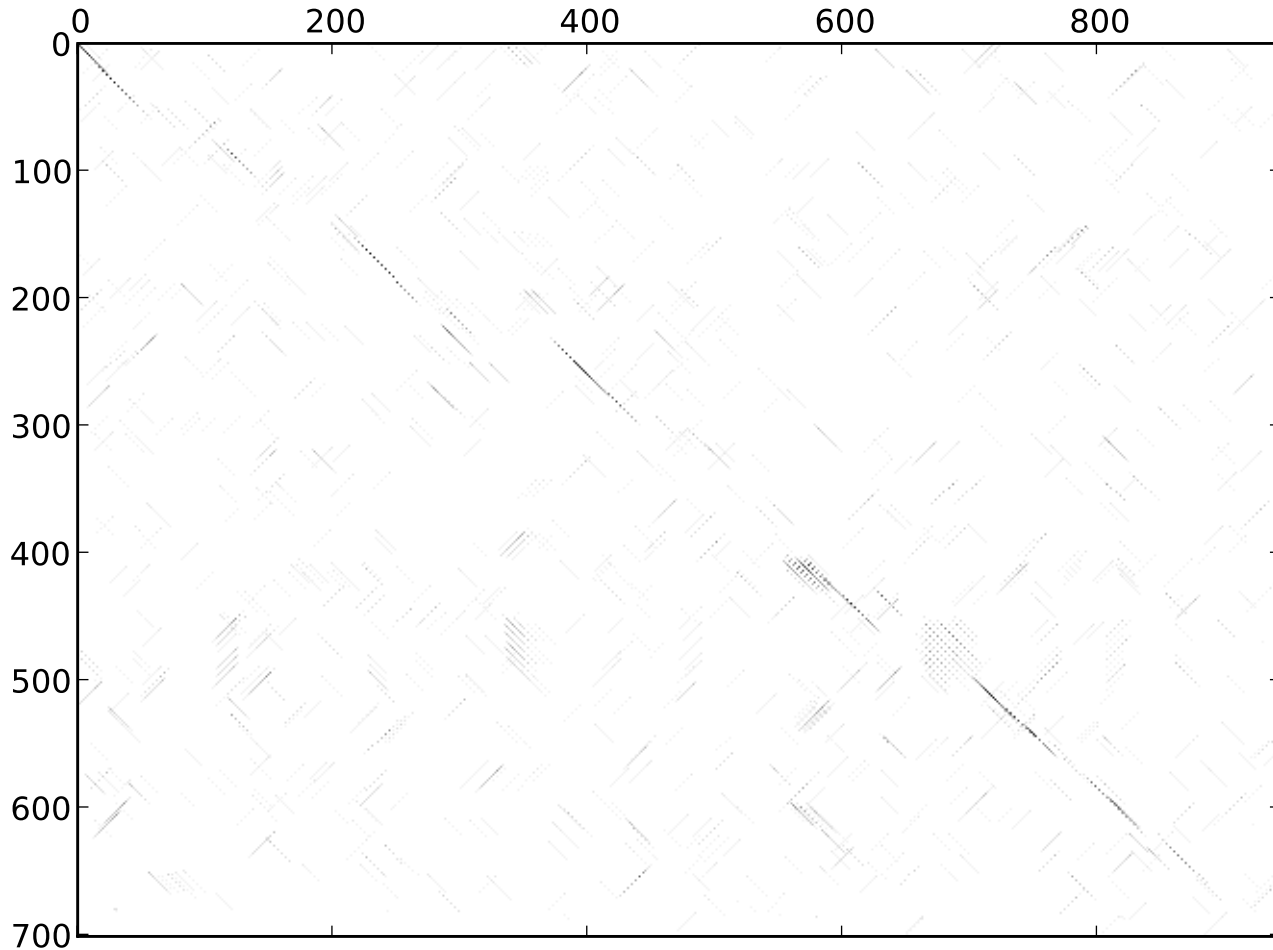

st2\_dmel\_dvir\_dotplot\_14-0.60\_rev\_normed\_extend

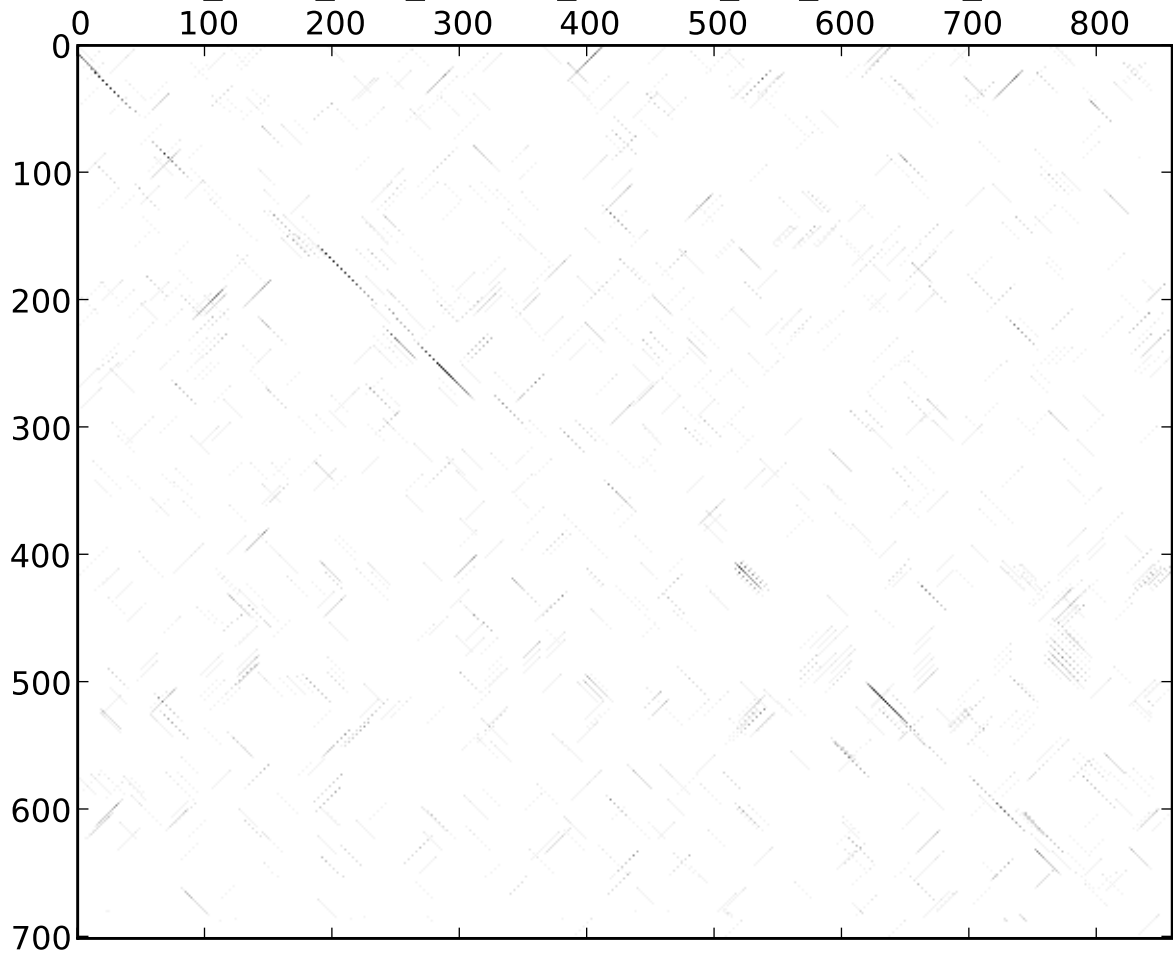

st2\_dmel\_sepsis\_cynipsea\_dotplot\_14-0.60\_rev\_normed\_extend

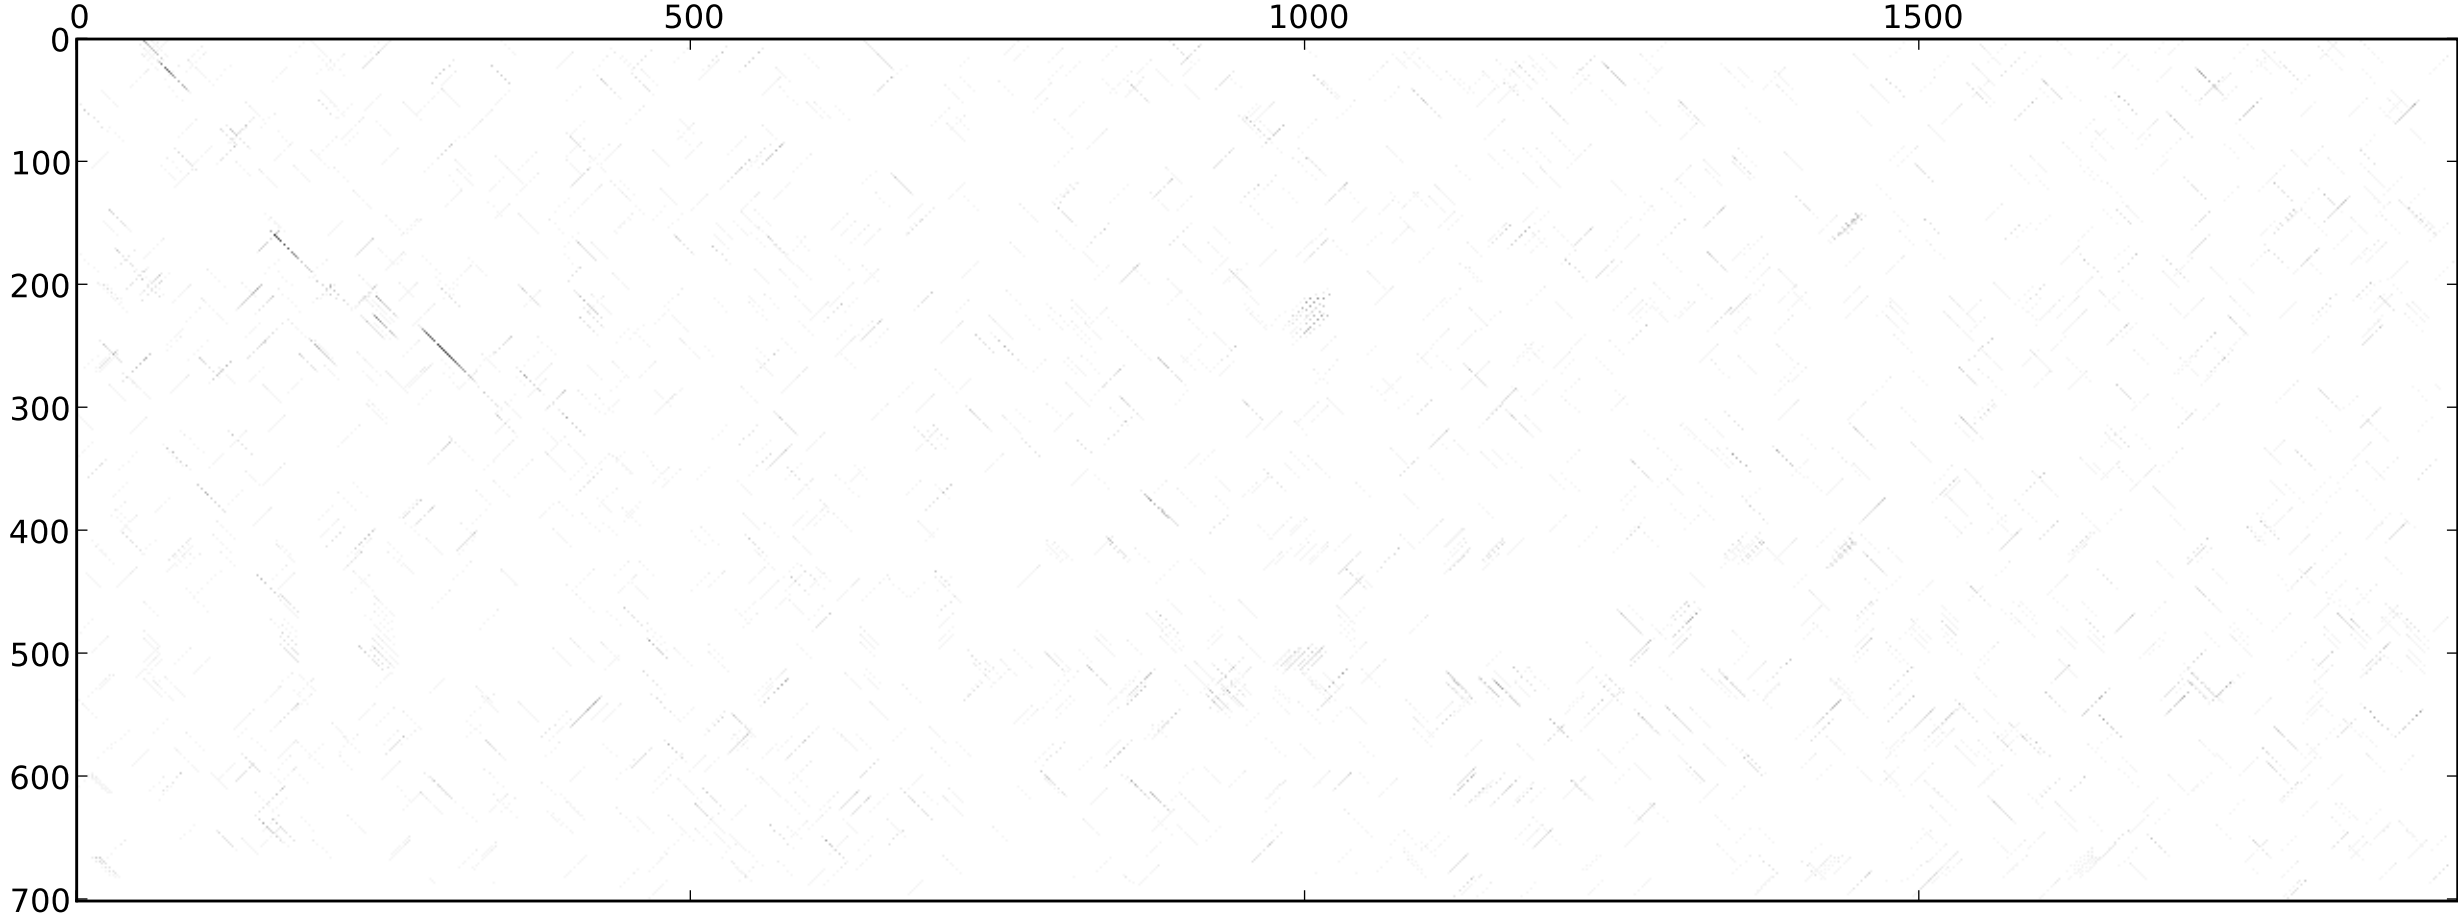

st2\_dmel\_themira\_putris\_dotplot\_14-0.60\_rev\_normed\_extend

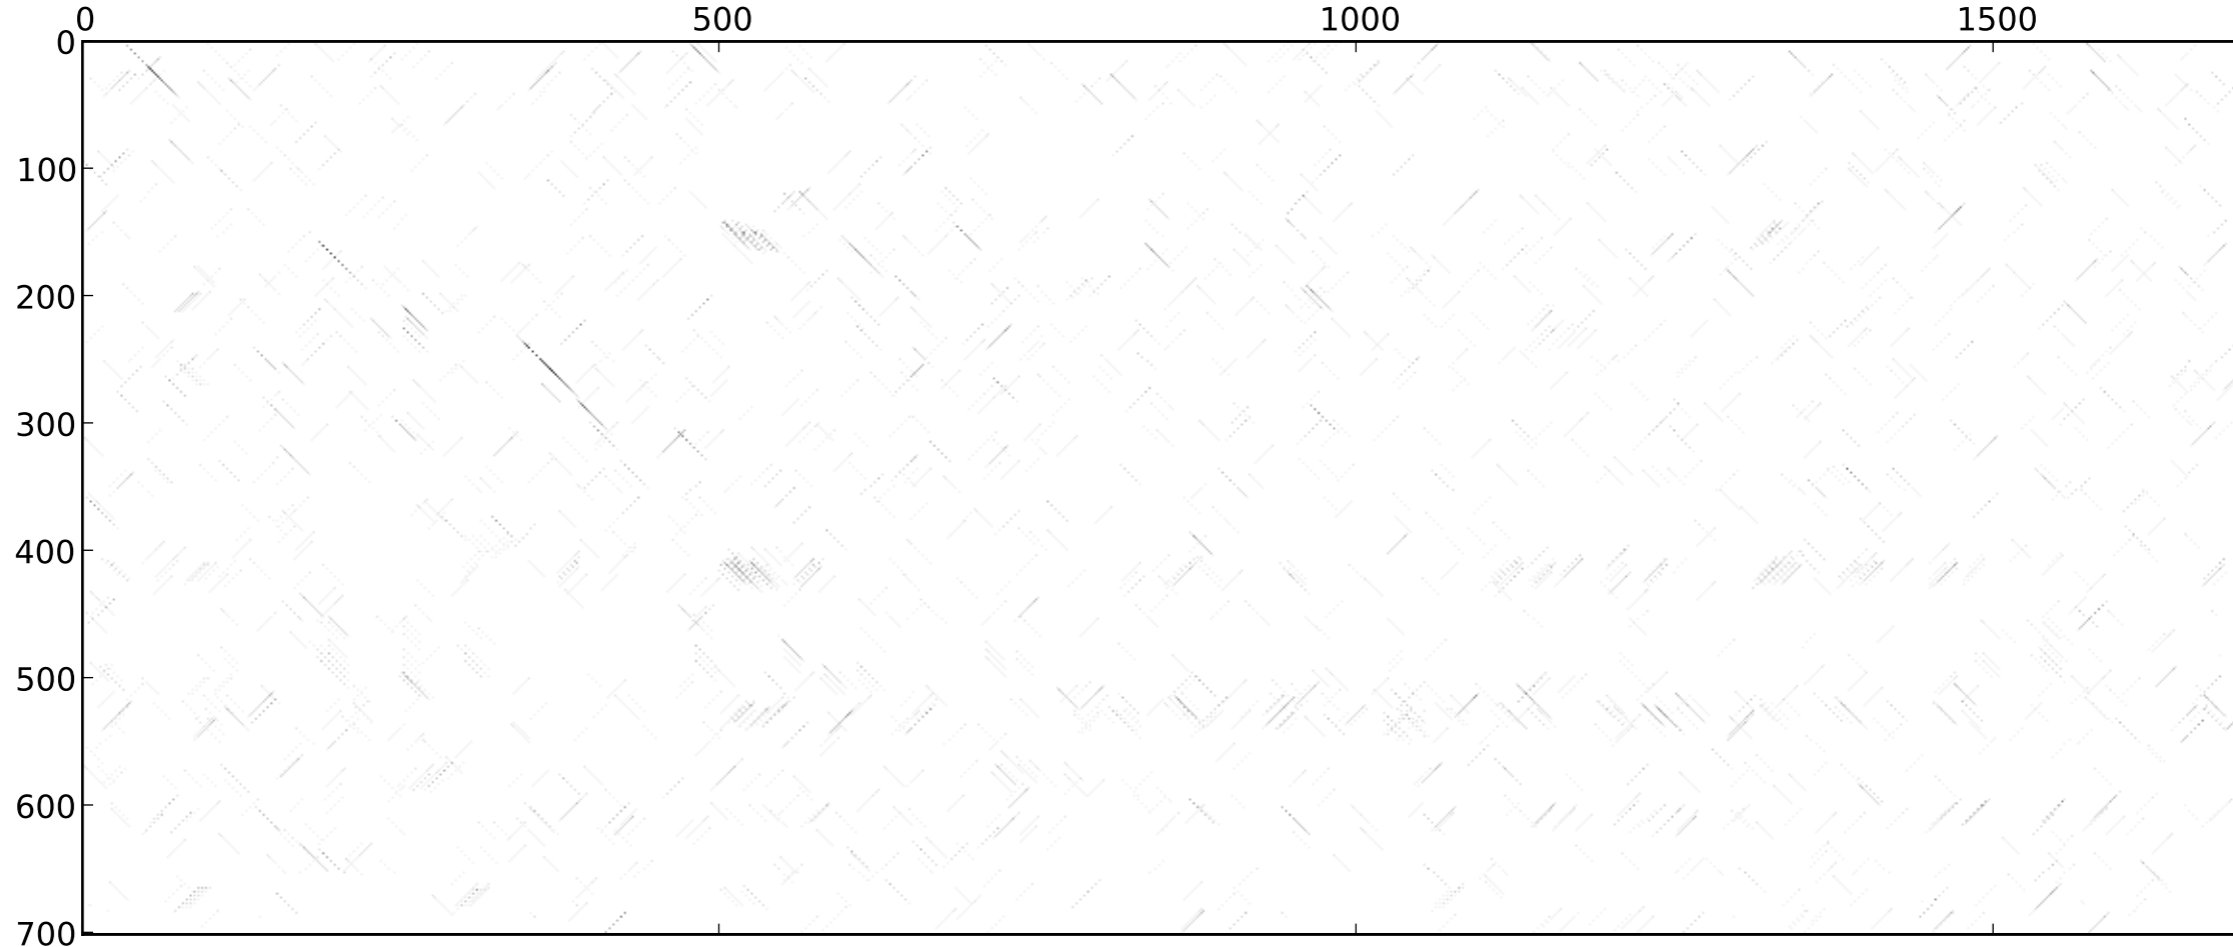

st37\_dmel\_dpse\_dotplot\_14-0.60\_rev\_normed\_extend

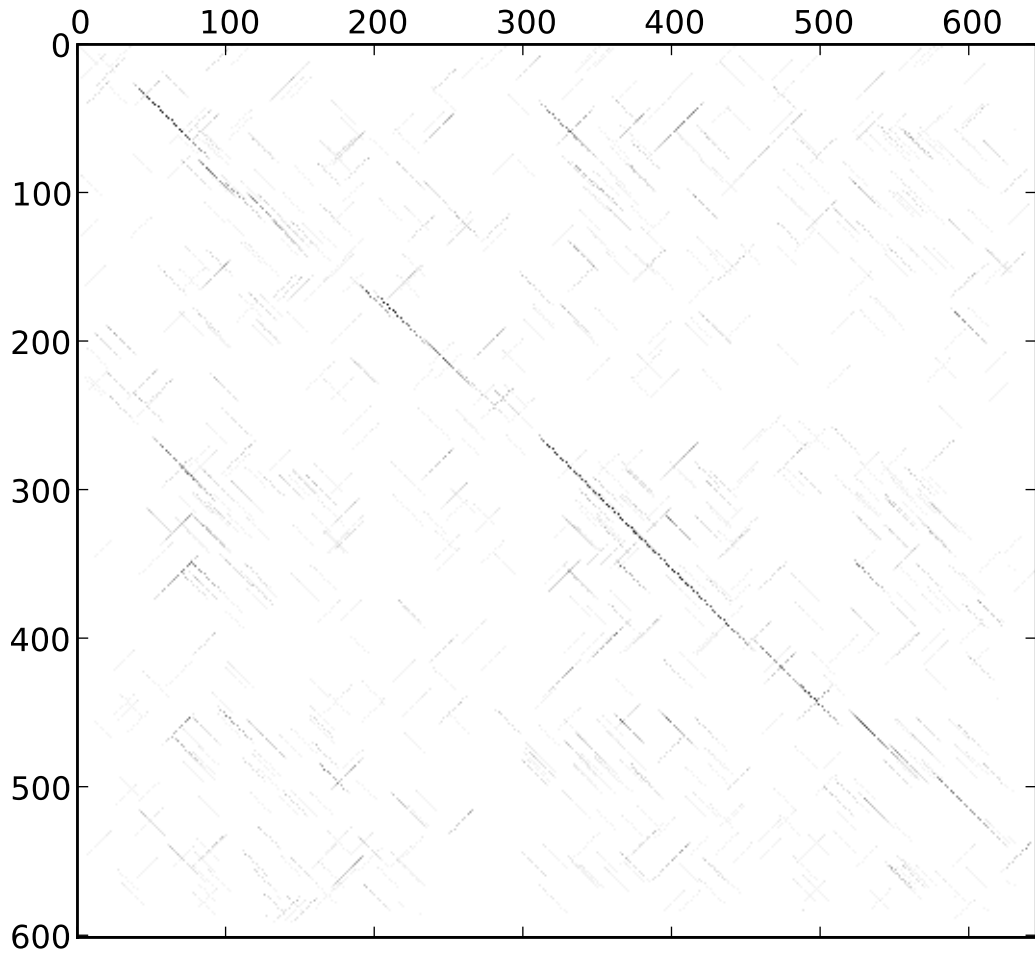

st37\_dmel\_dvir\_dotplot\_14-0.60\_rev\_normed\_extend

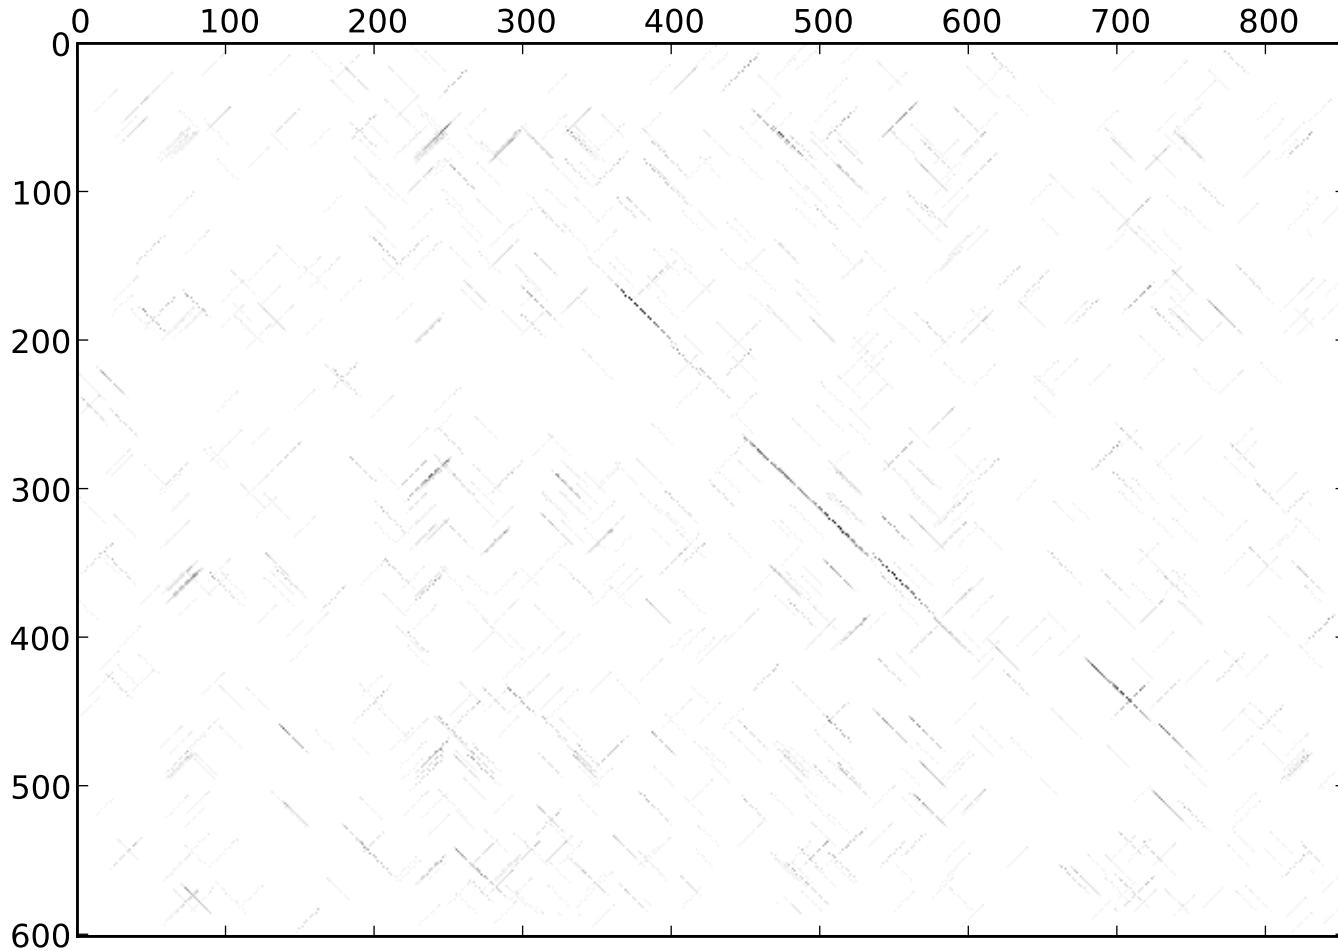

st37\_dmel\_sepsis\_cynipsea\_dotplot\_14-0.60\_rev\_normed\_extend

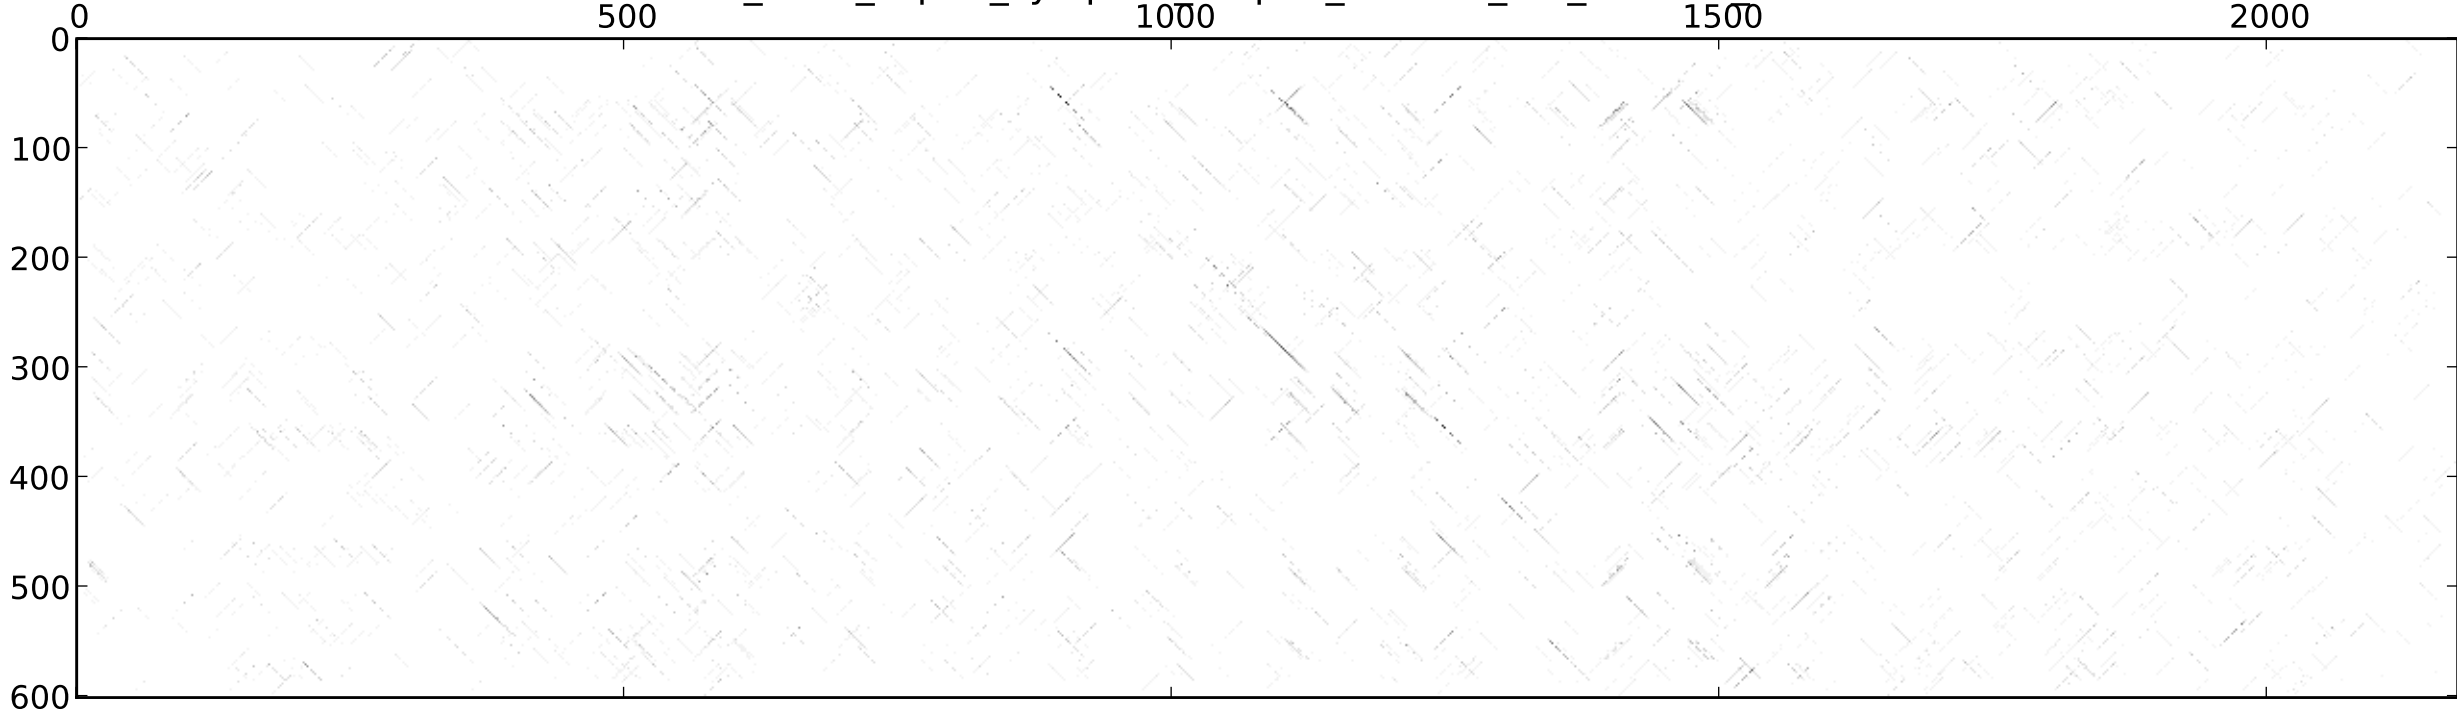

st37\_dmel\_themira\_putris\_dotplot\_14-0.60\_rev\_normed\_extend

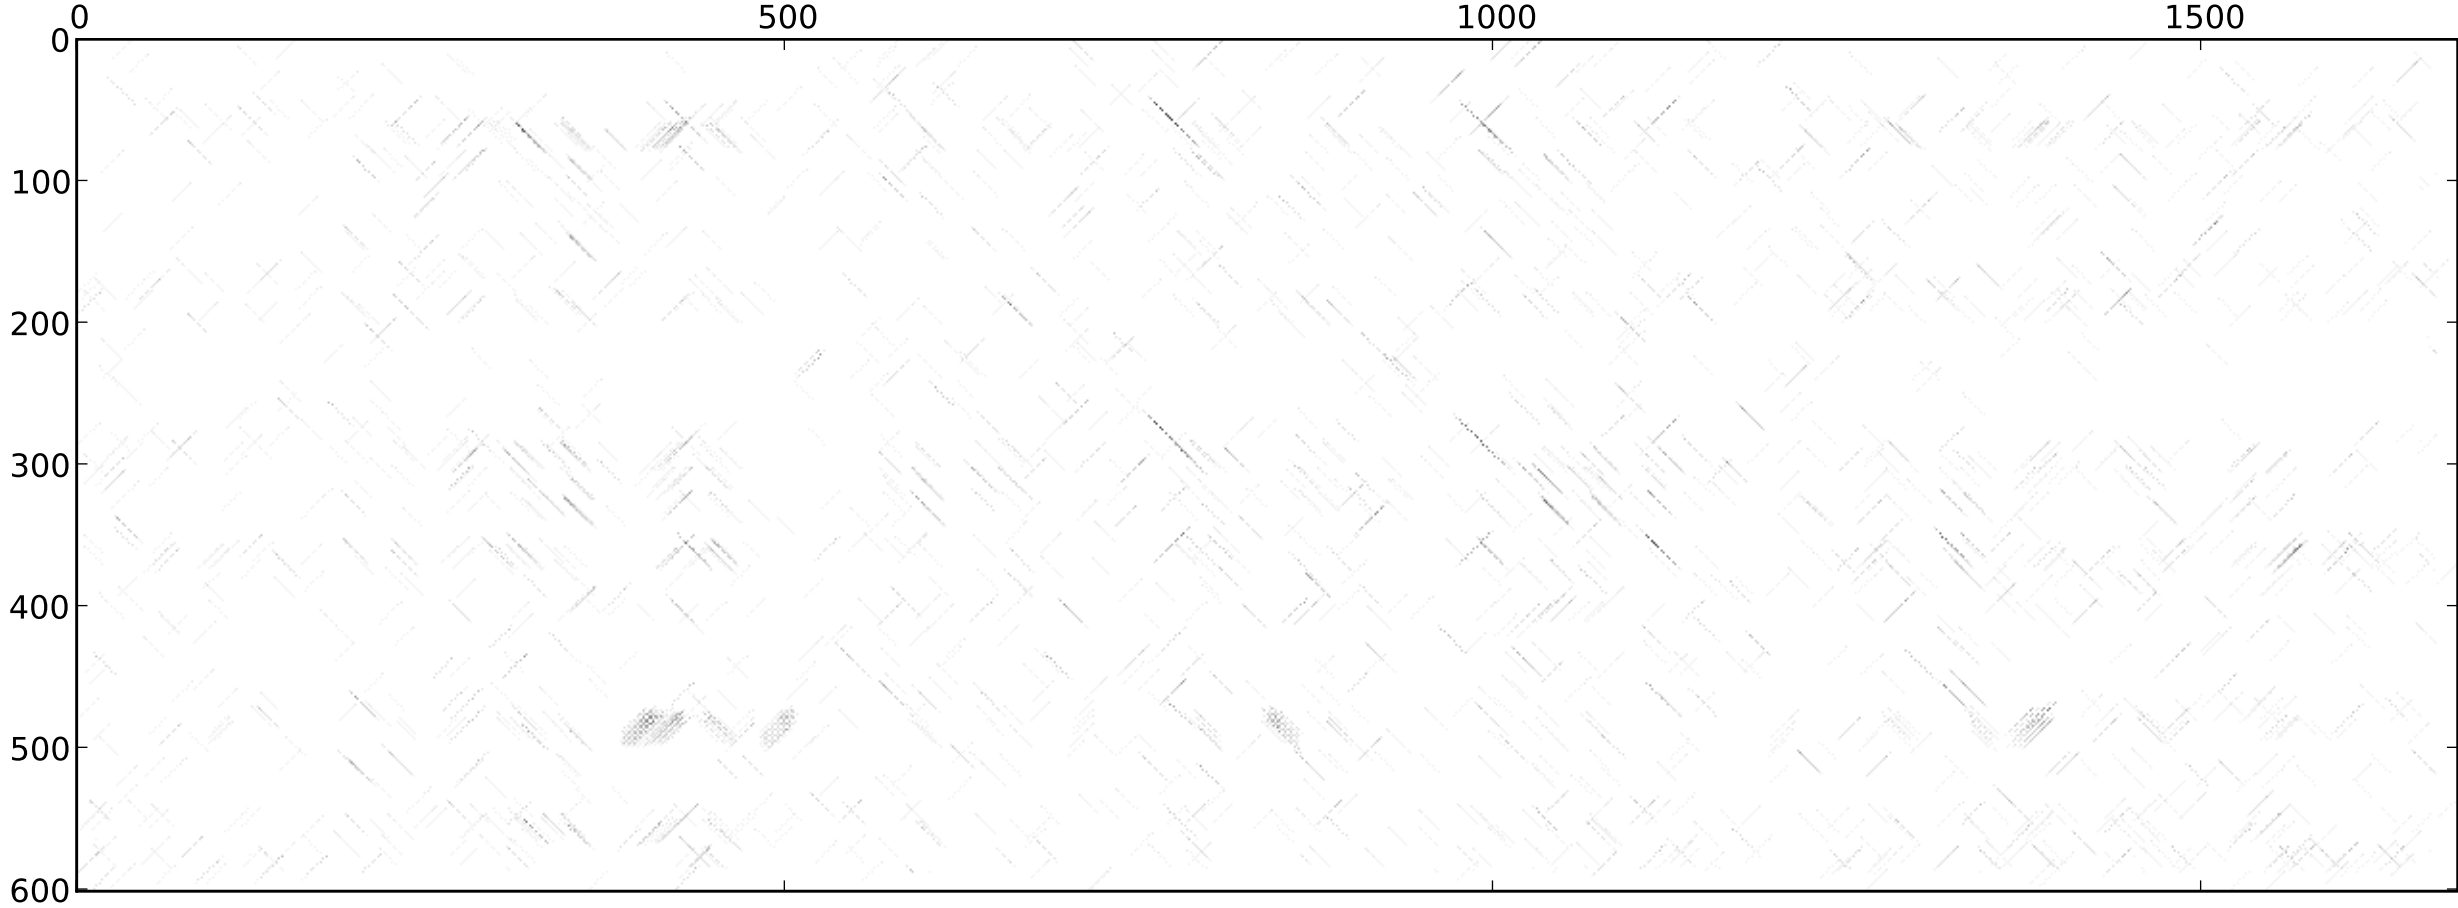



st46\_dmel\_dpse\_dotplot\_14-0.60\_rev\_normed\_extend

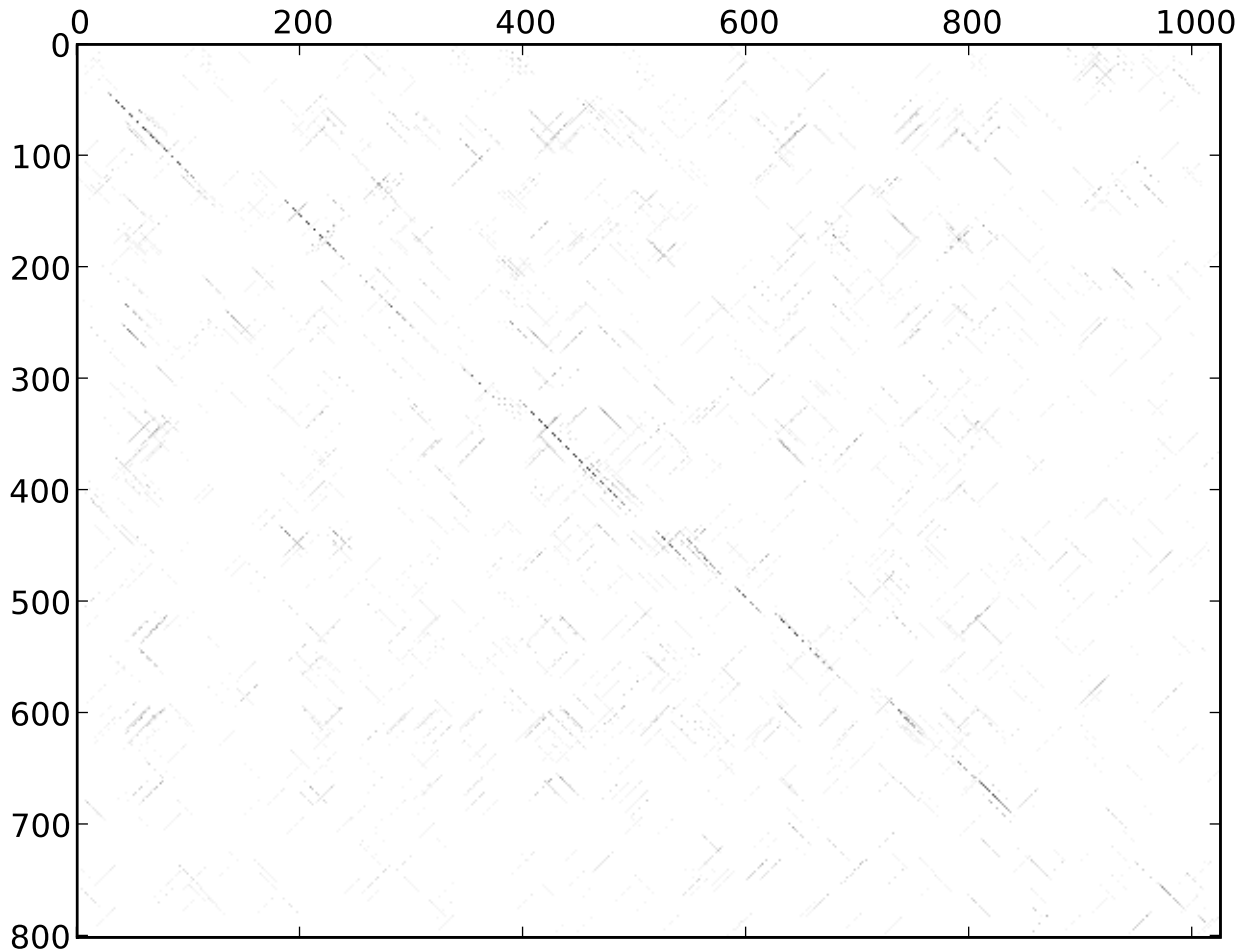

st46\_dmel\_dvir\_dotplot\_14-0.60\_rev\_normed\_extend

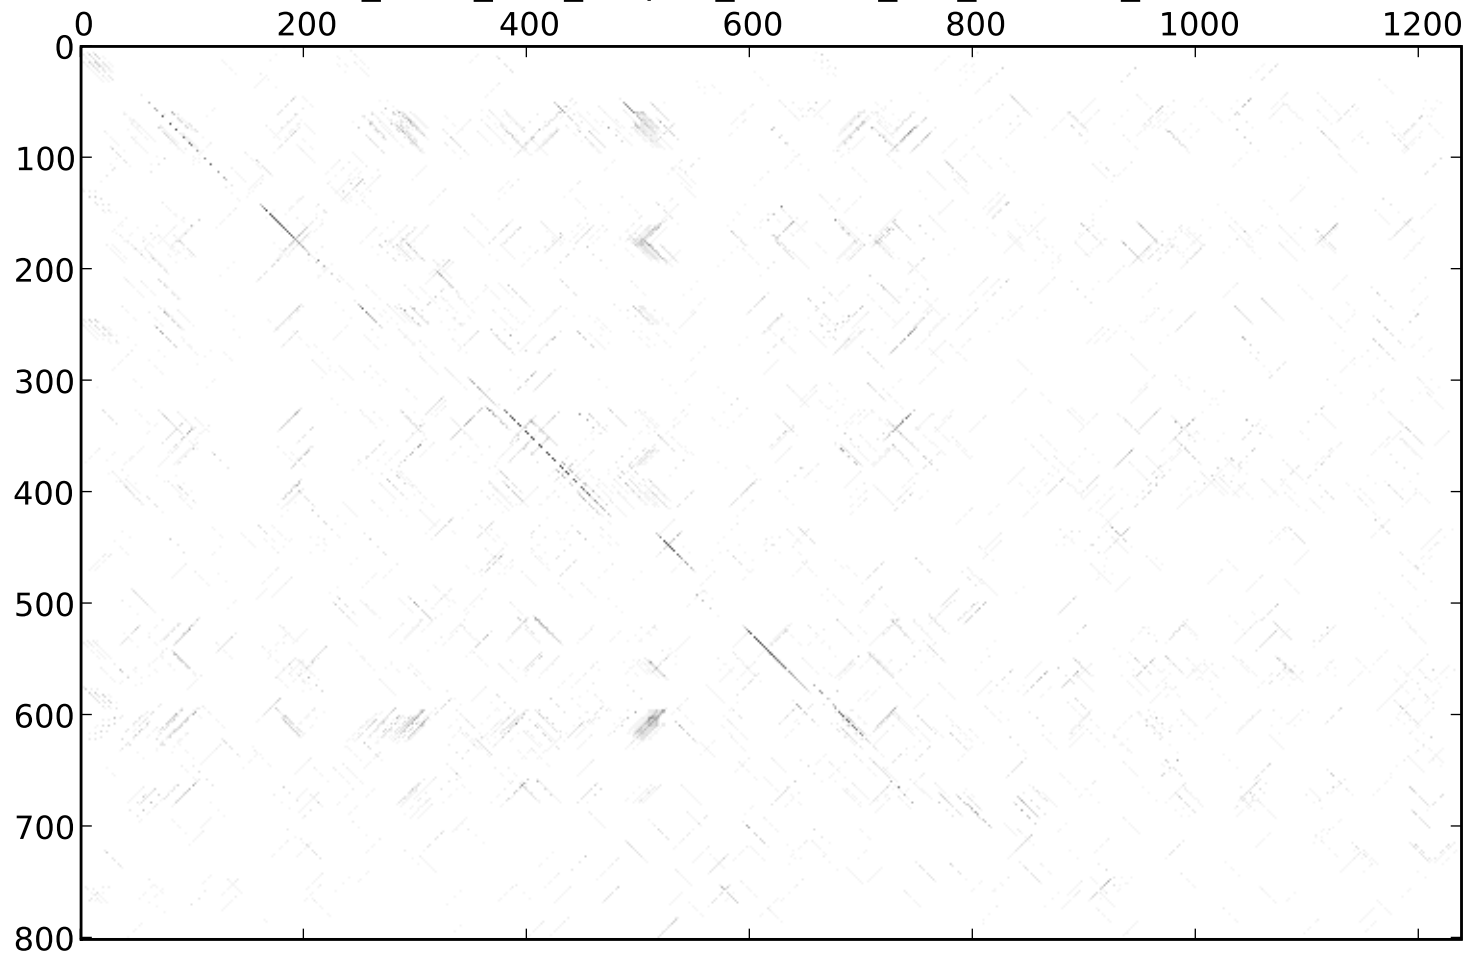

st46\_dmel\_sepsis\_cynipsea\_dotplot\_14-0.60\_rev\_normed\_extend

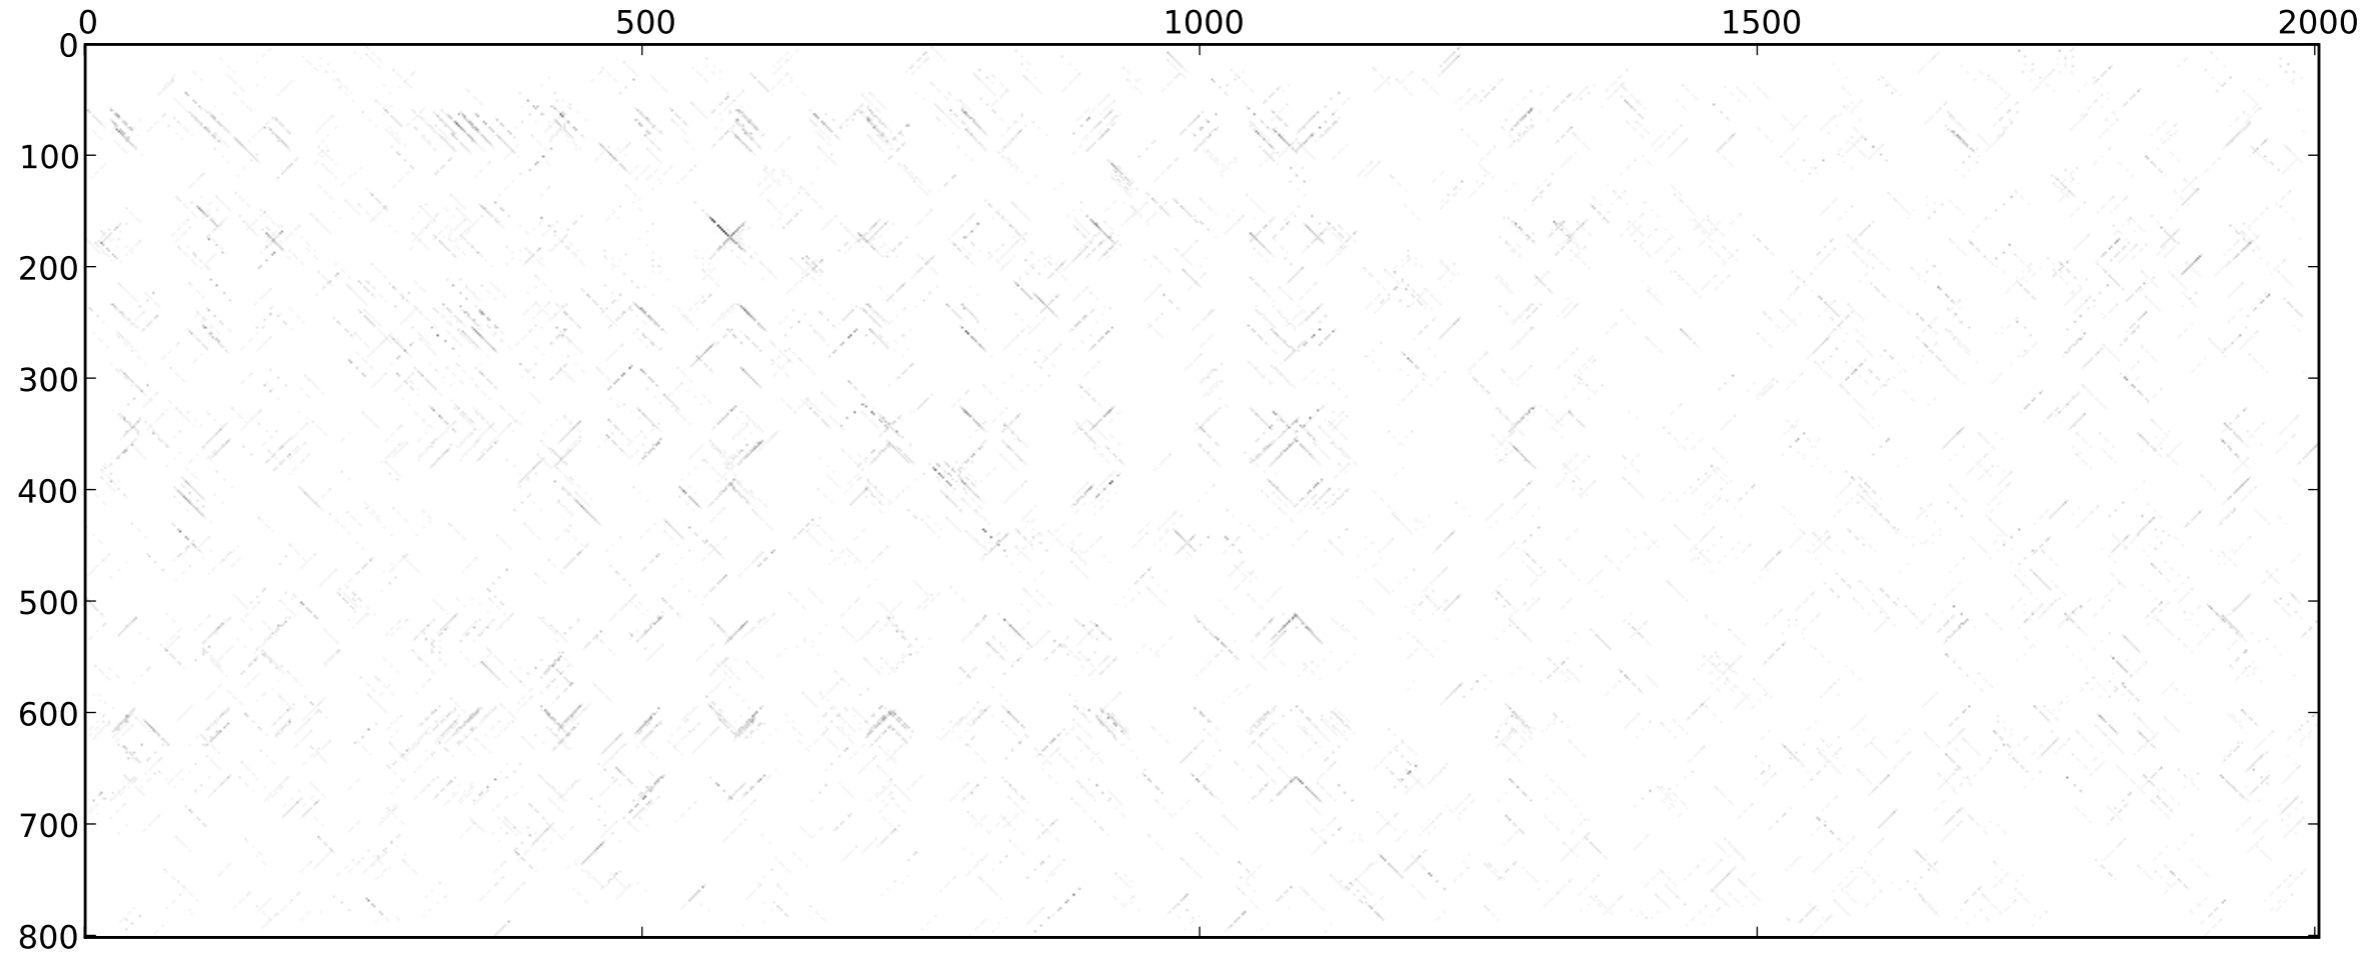

st46\_dmel\_themira\_putris\_dotplot\_14-0.60\_rev\_normed\_extend

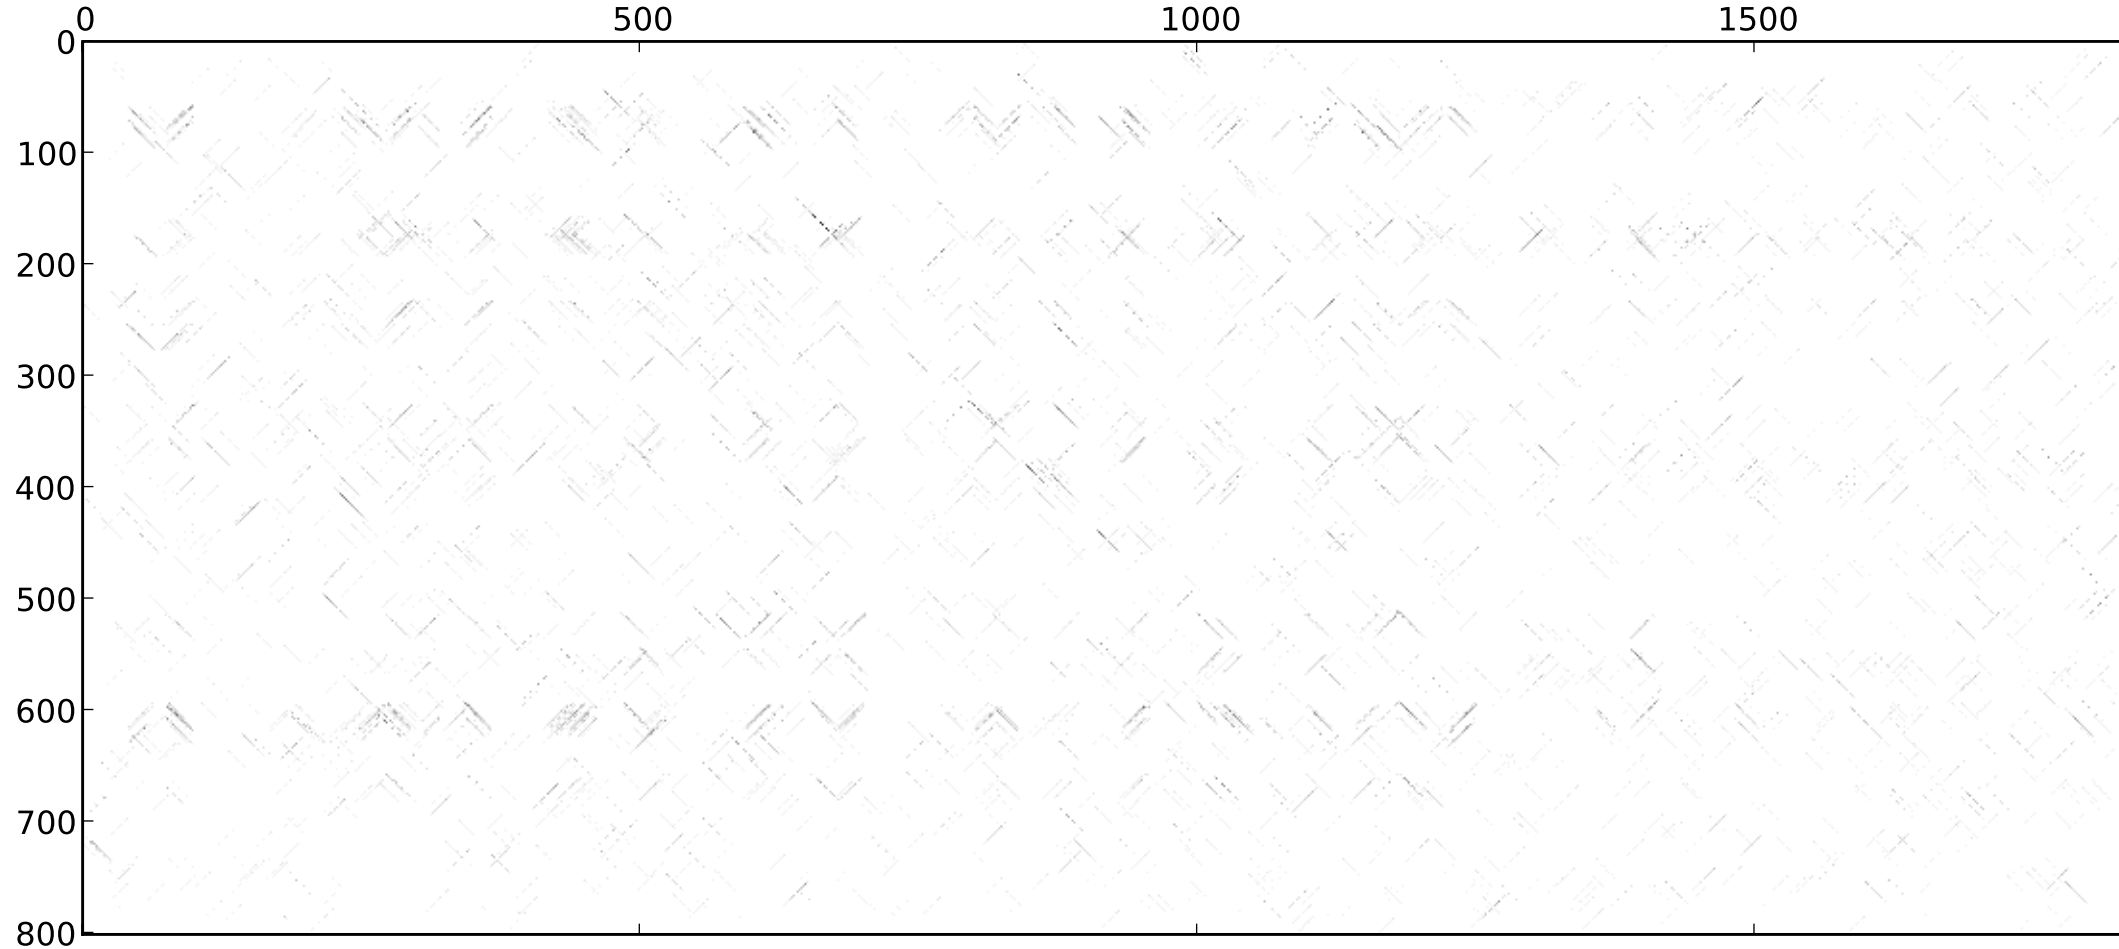

MHE\_dmel\_dpse\_dotplot\_14-0.60\_rev\_normed\_extend

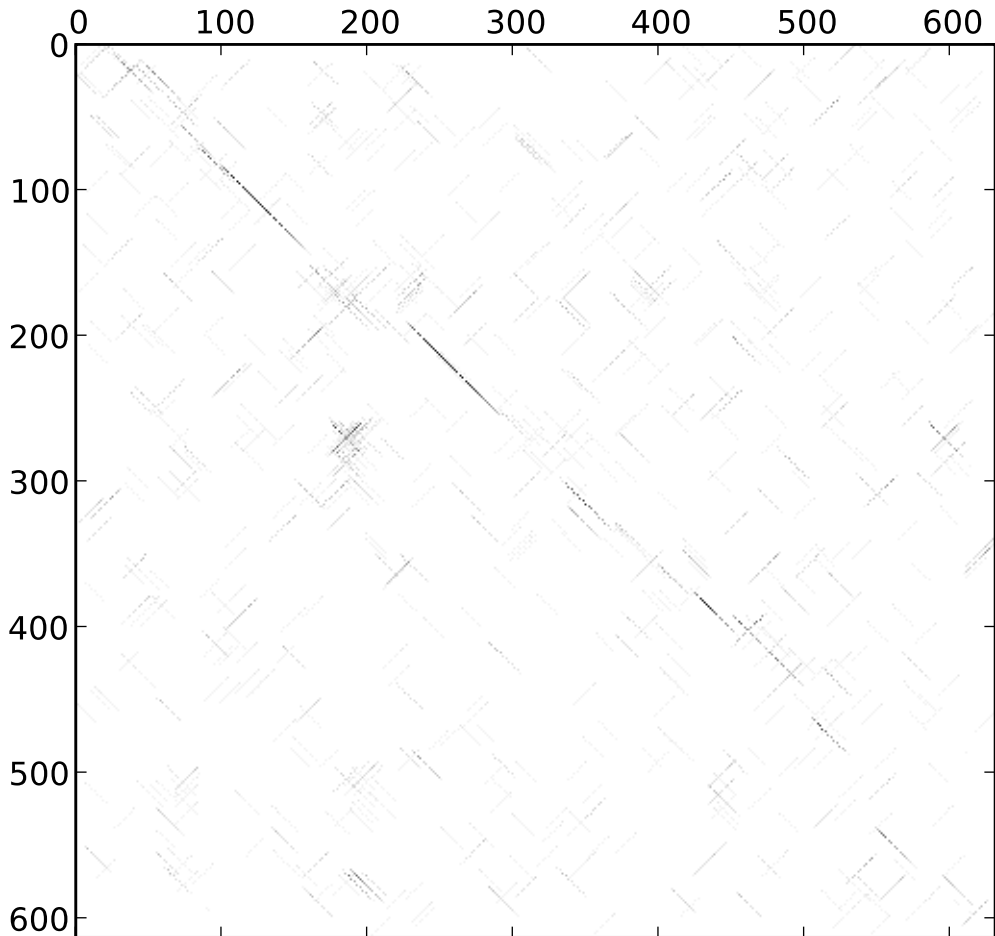

MHE\_dmel\_dvir\_dotplot\_14-0.60\_rev\_normed\_ex

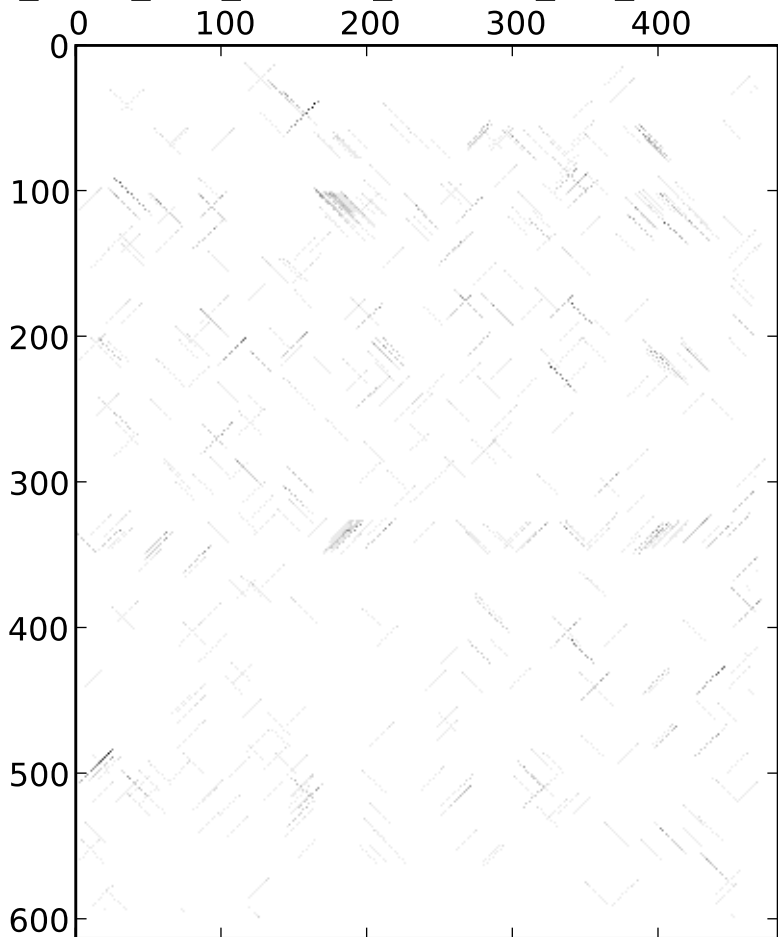

MHE\_dmel\_sepsis\_cynipsea\_dotplot\_14-0.60\_rev\_normed\_extend

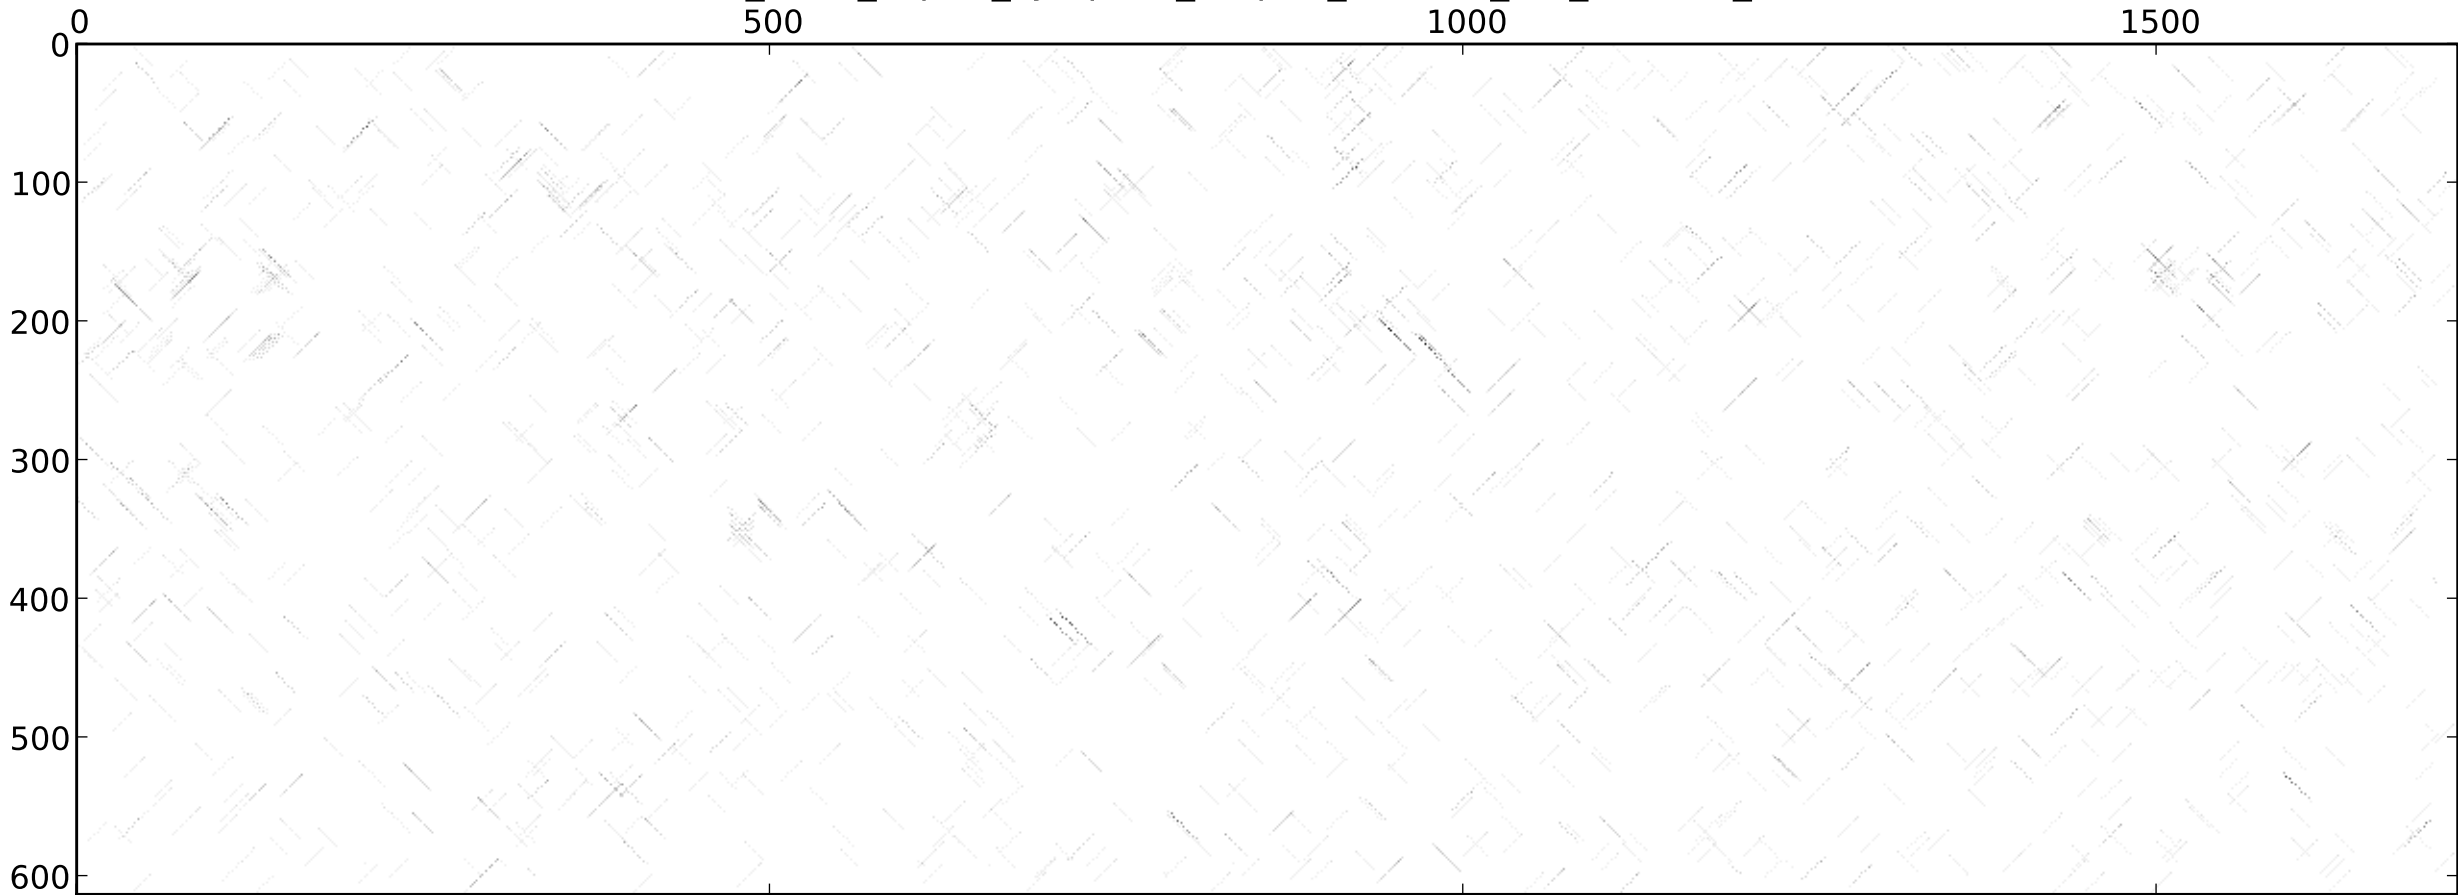

MHE\_dmel\_themira\_putris\_dotplot\_14-0.60\_rev\_normed\_extend

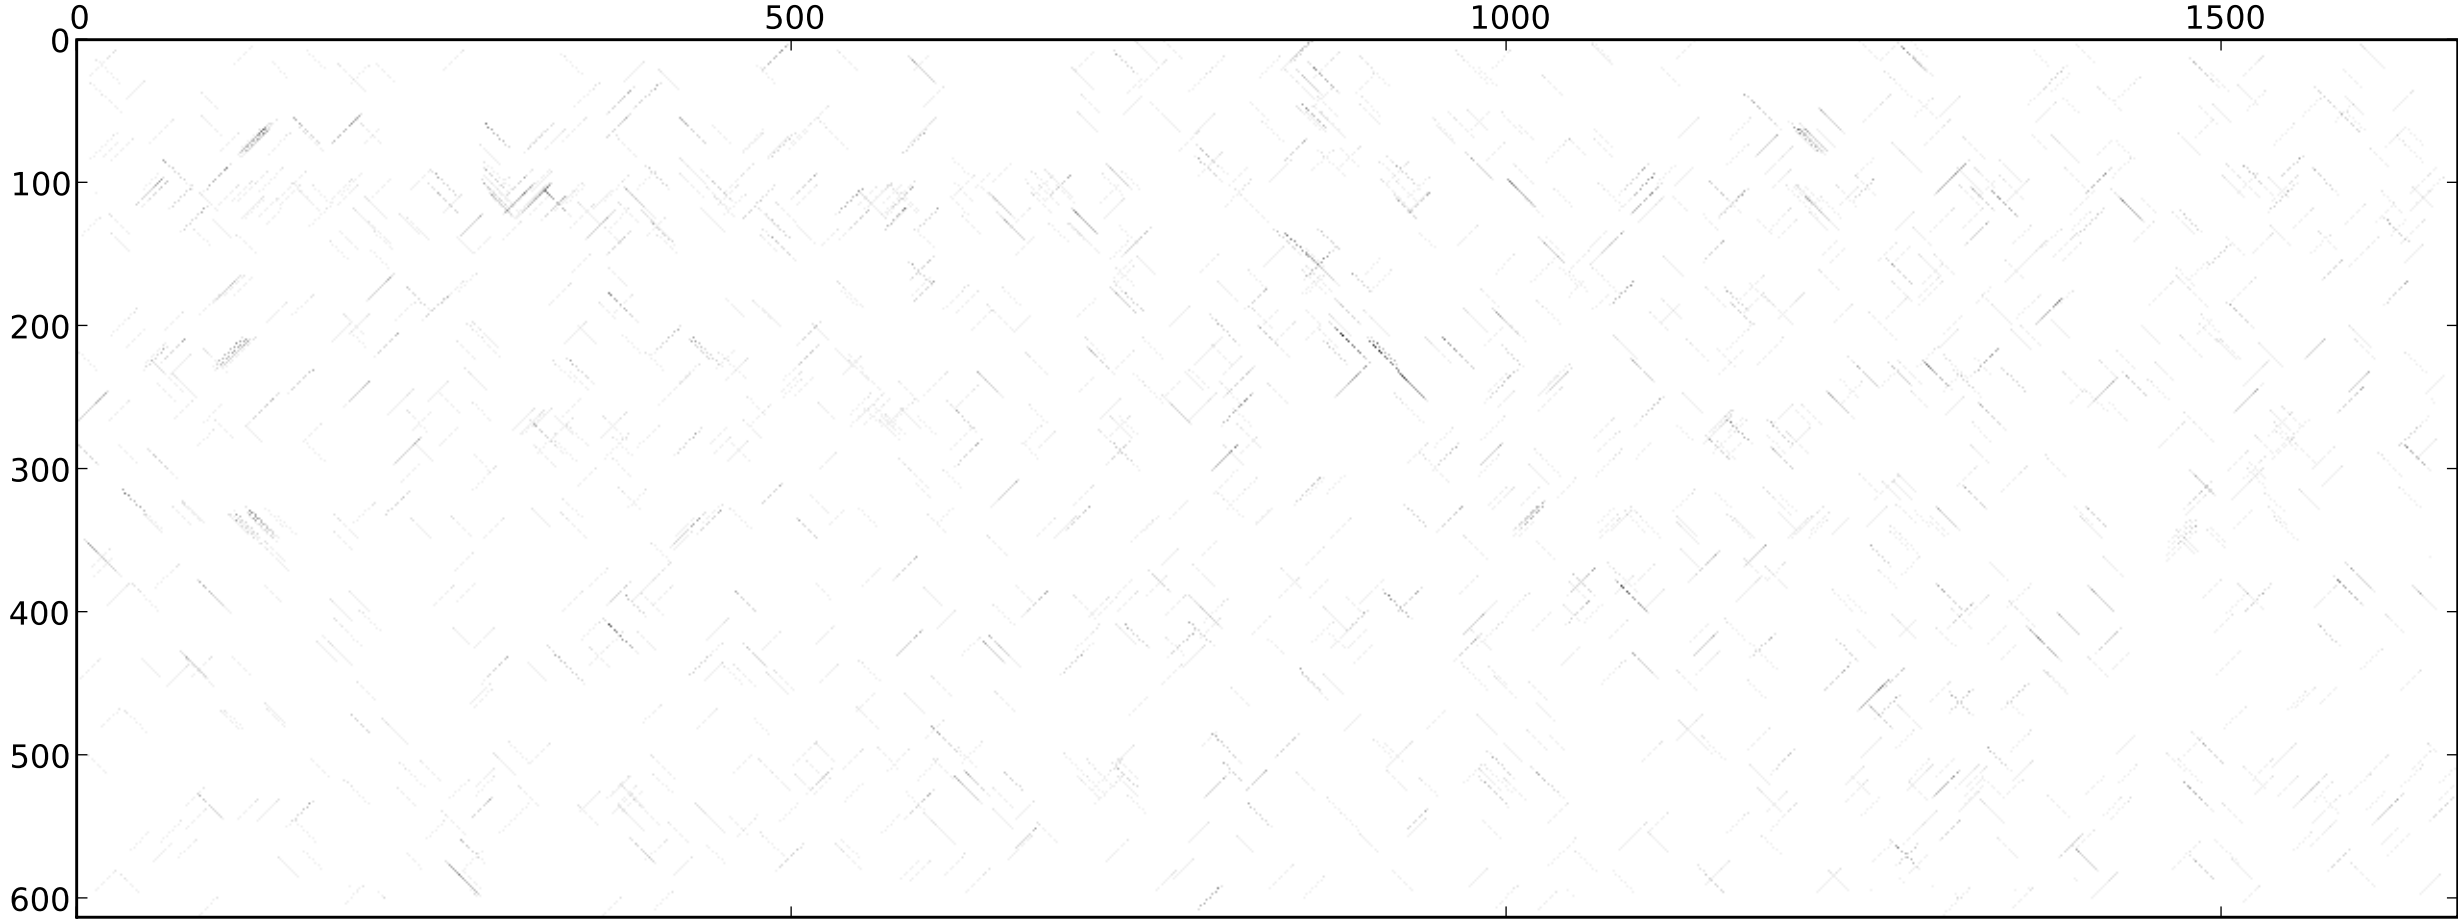

Supplement: pgen.1000268.s001.pdf [file pgen.1000268.s001.pdf]
