# Supplementary material for: A Careful Look at Binding Site Reorganization in the even-skipped Enhancers of Drosophila and Sepsids
Source: PubMed Central journal article supplement (PMC2582681; doi:10.1371/journal.pgen.1000268), 2008-11-28

st2\_dmel\_dpse\_blastmap\_9.pdf

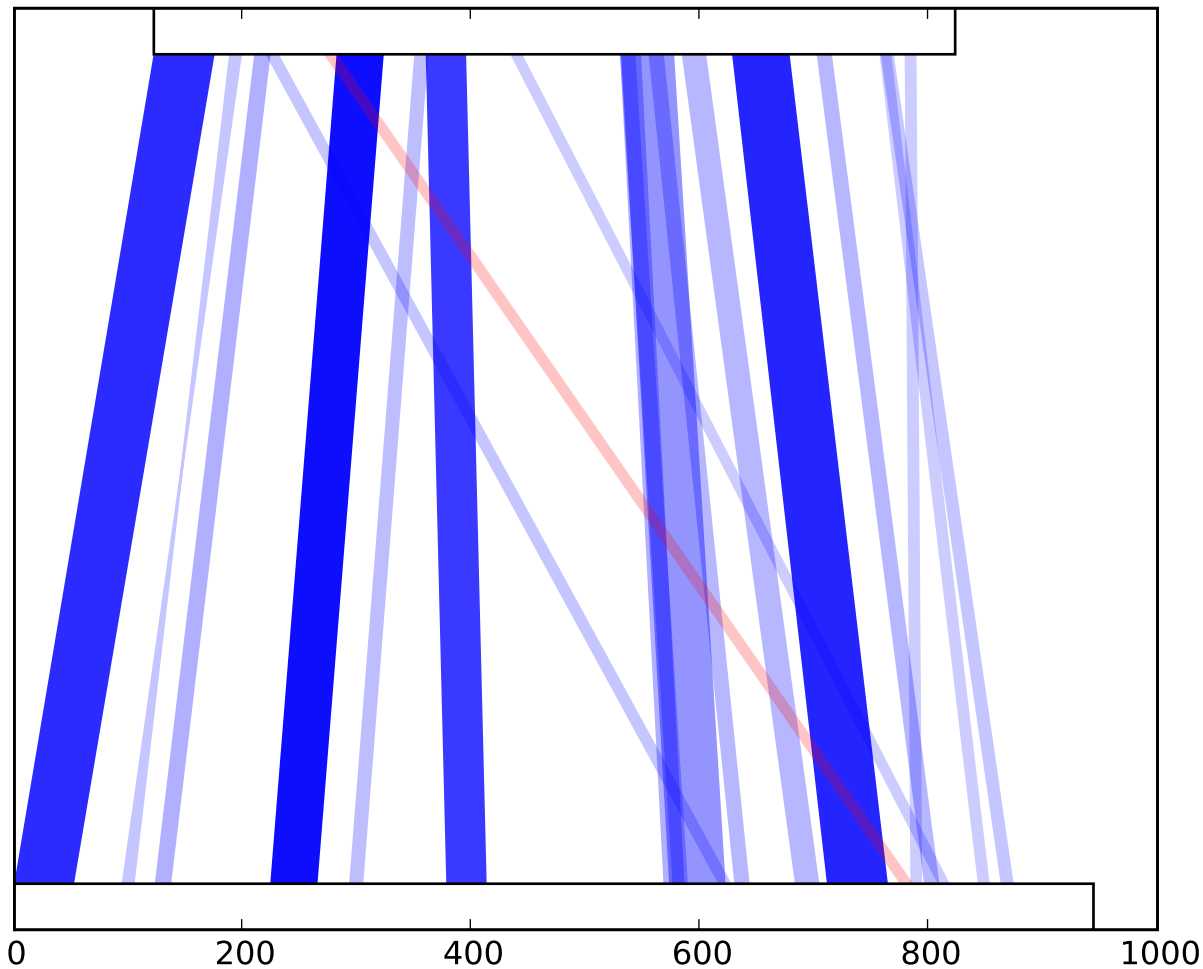

st2\_dmel\_dvir\_blastmap\_9.pdf

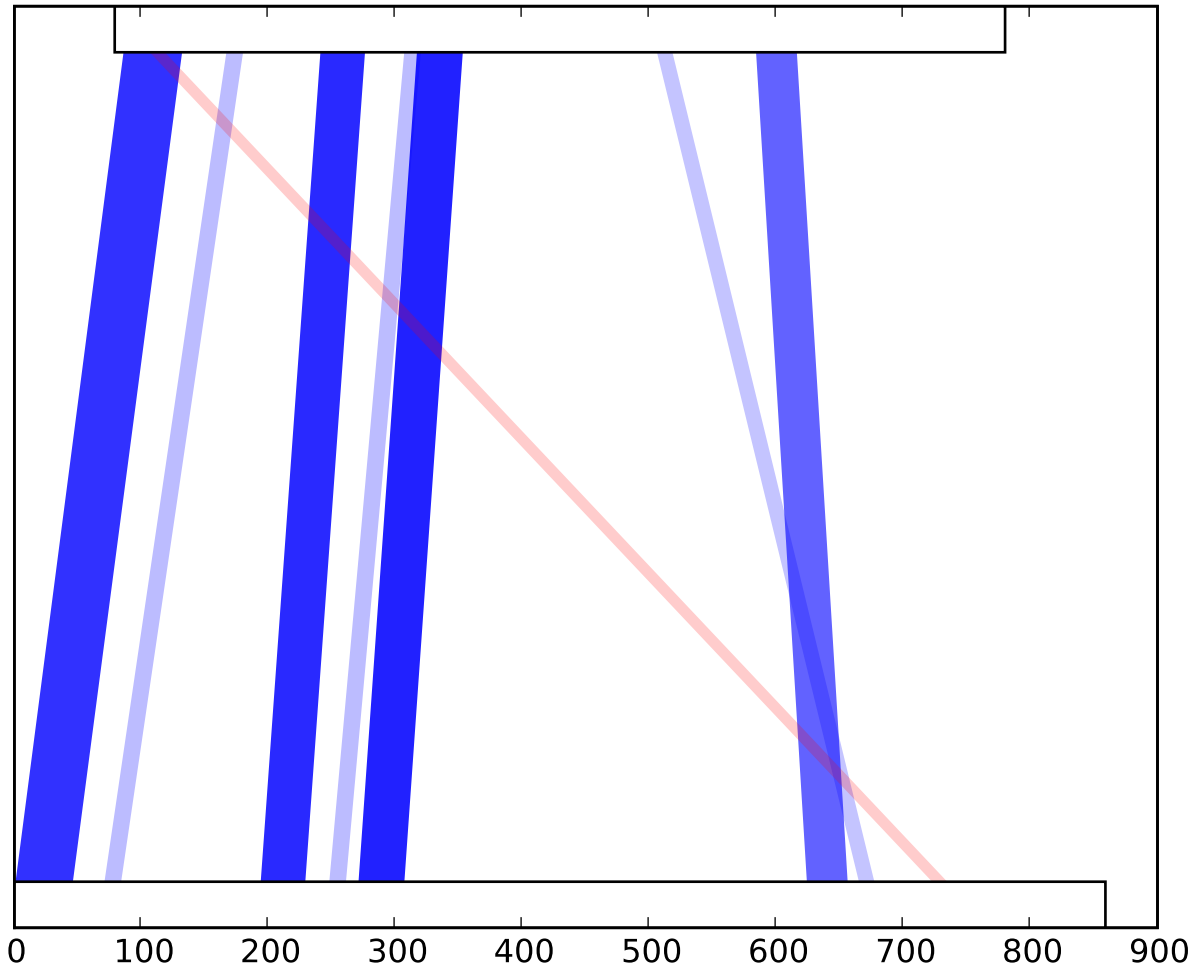

st2\_dmel\_sepsis\_cynipsea\_blastmap\_9.pdf

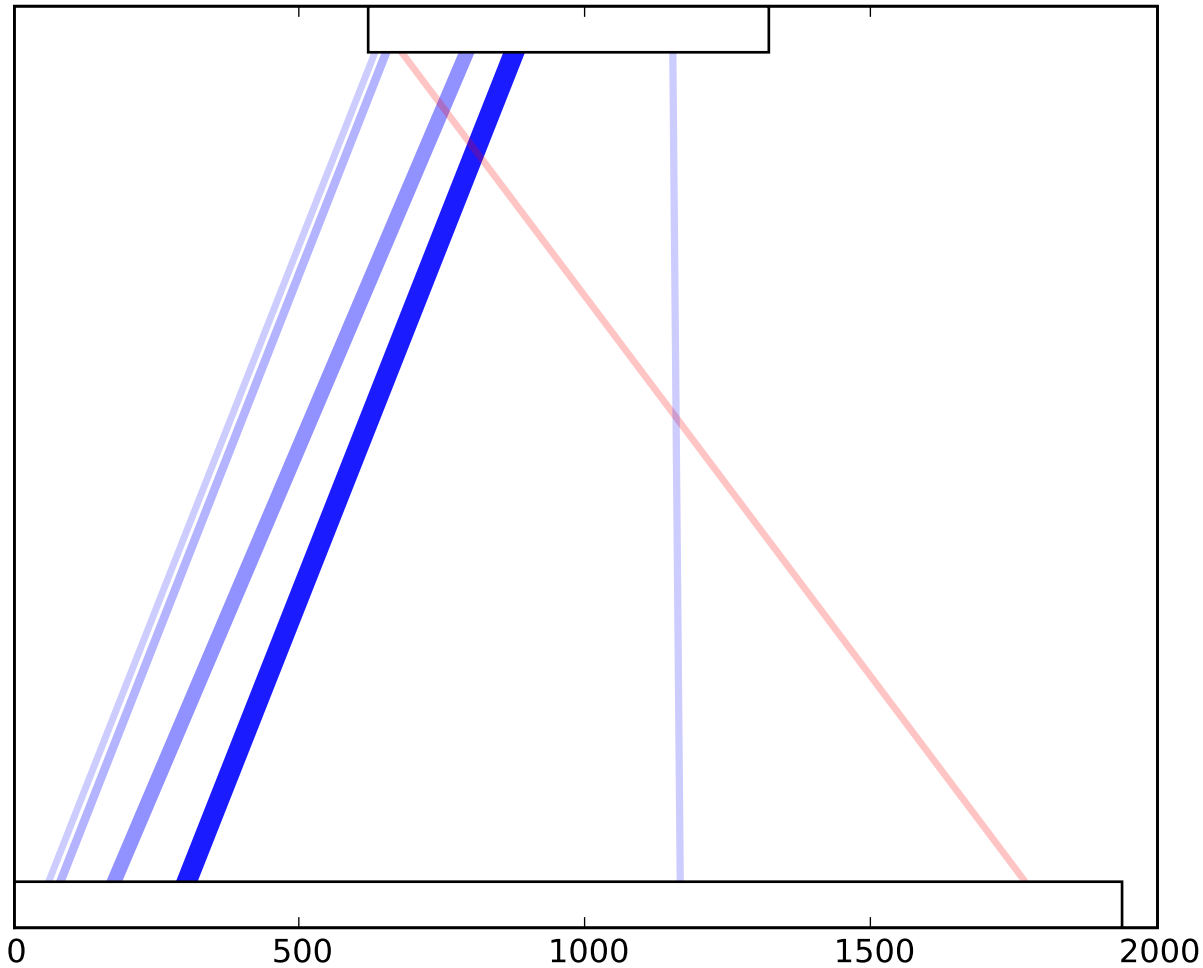

st2\_dmel\_themira\_putris\_blastmap\_9.pdf

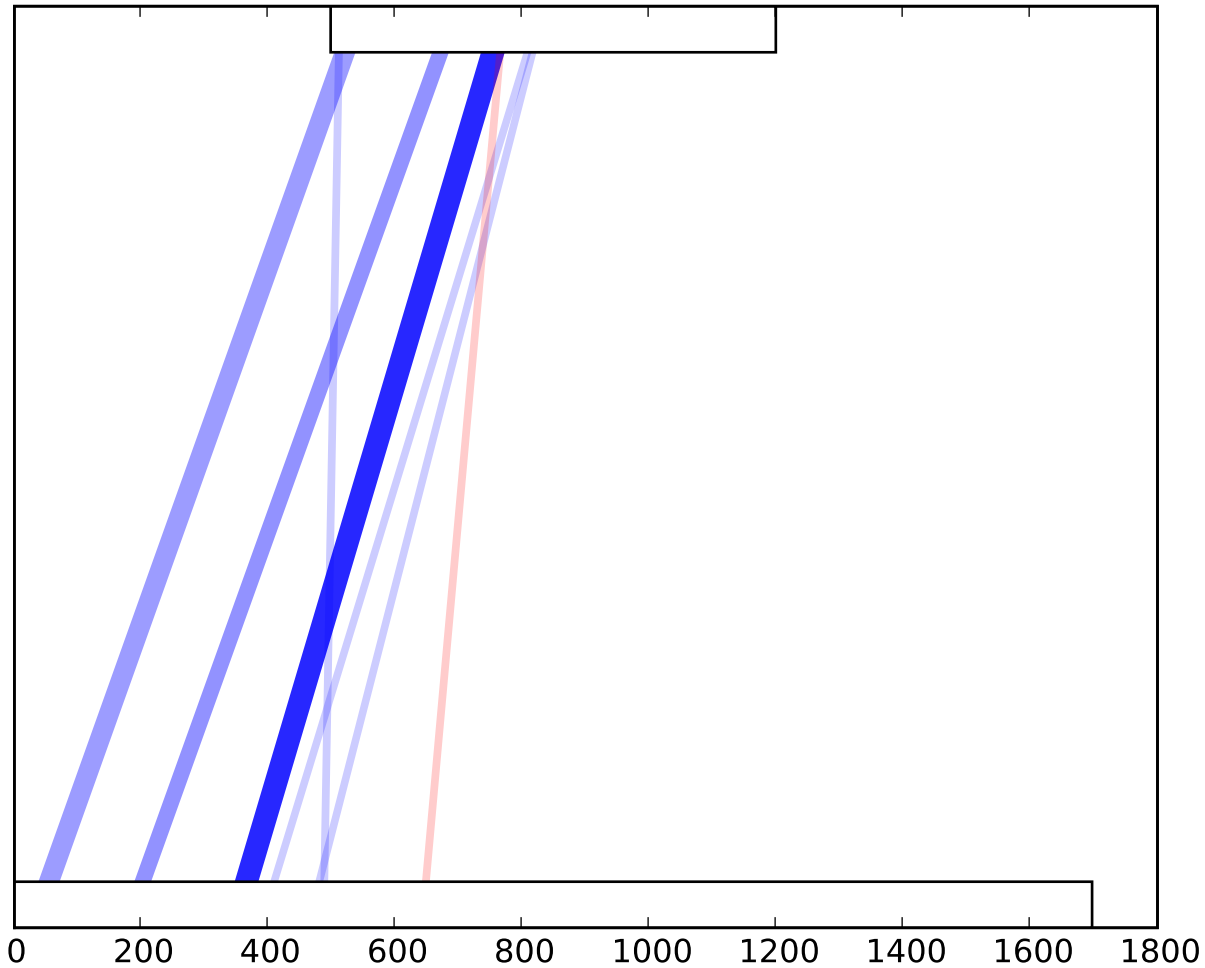

st37\_dmel\_dpse\_blastmap\_9.pdf

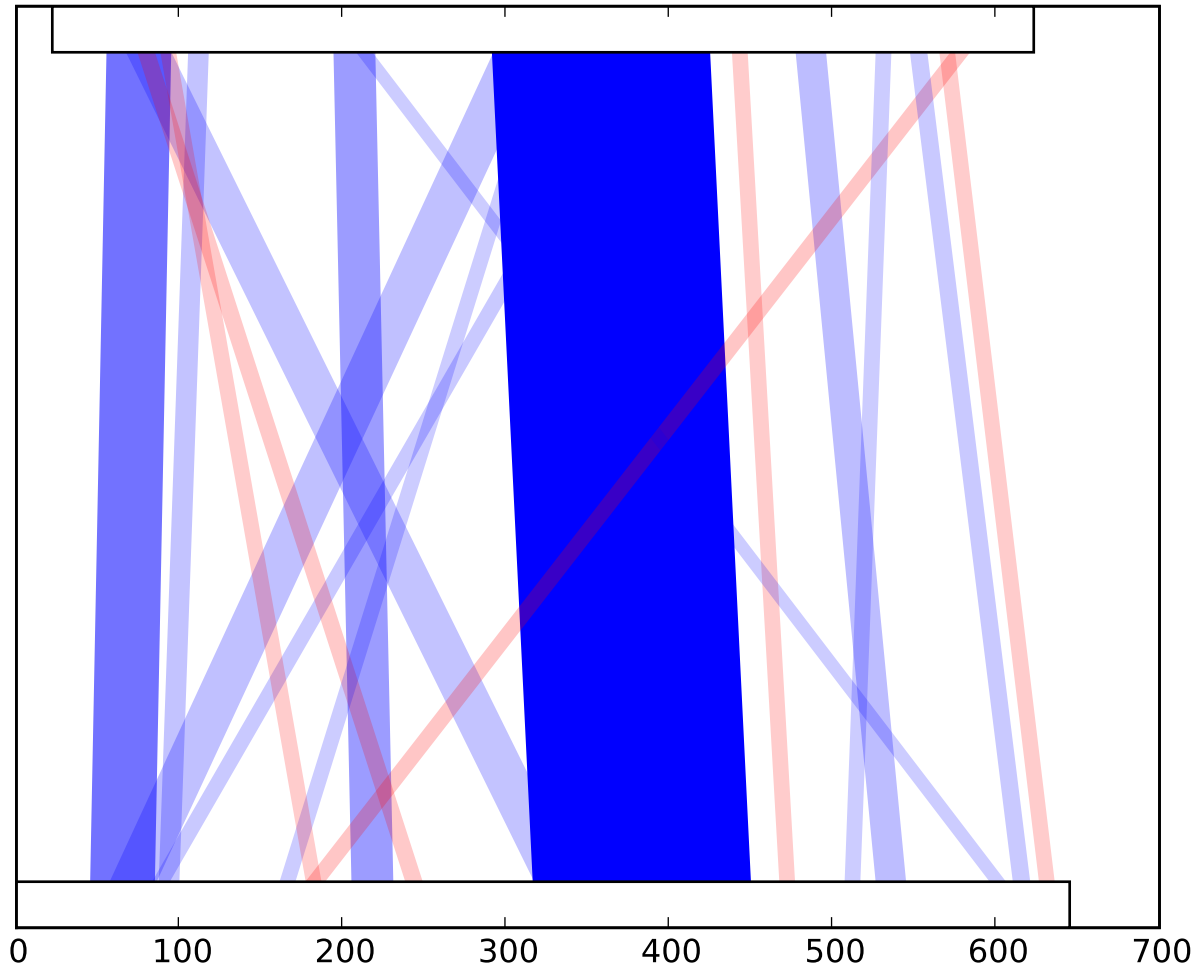

st37\_dmel\_dvir\_blastmap\_9.pdf

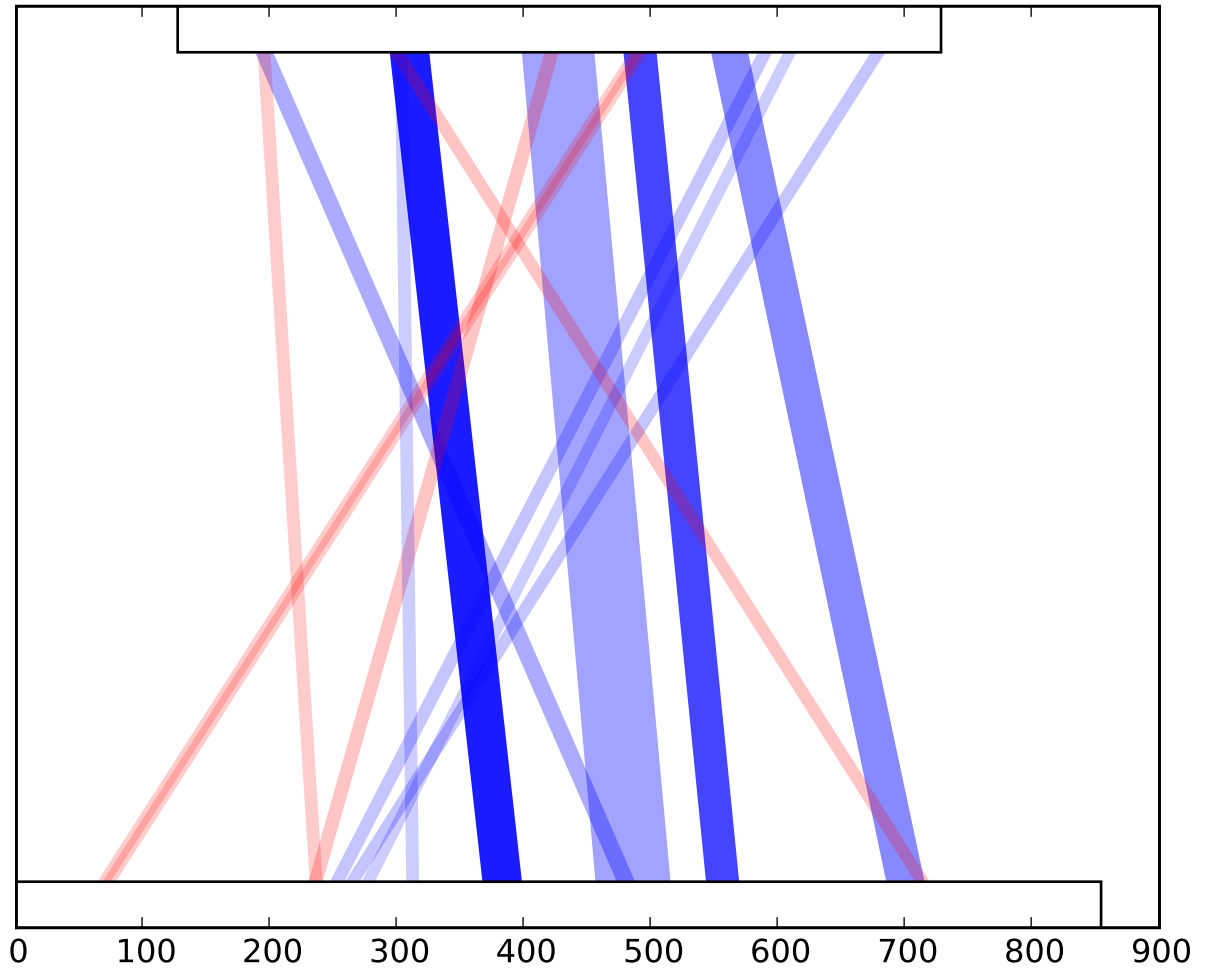

st37\_dmel\_sepsis\_cynipsea\_blastmap\_9.pdf

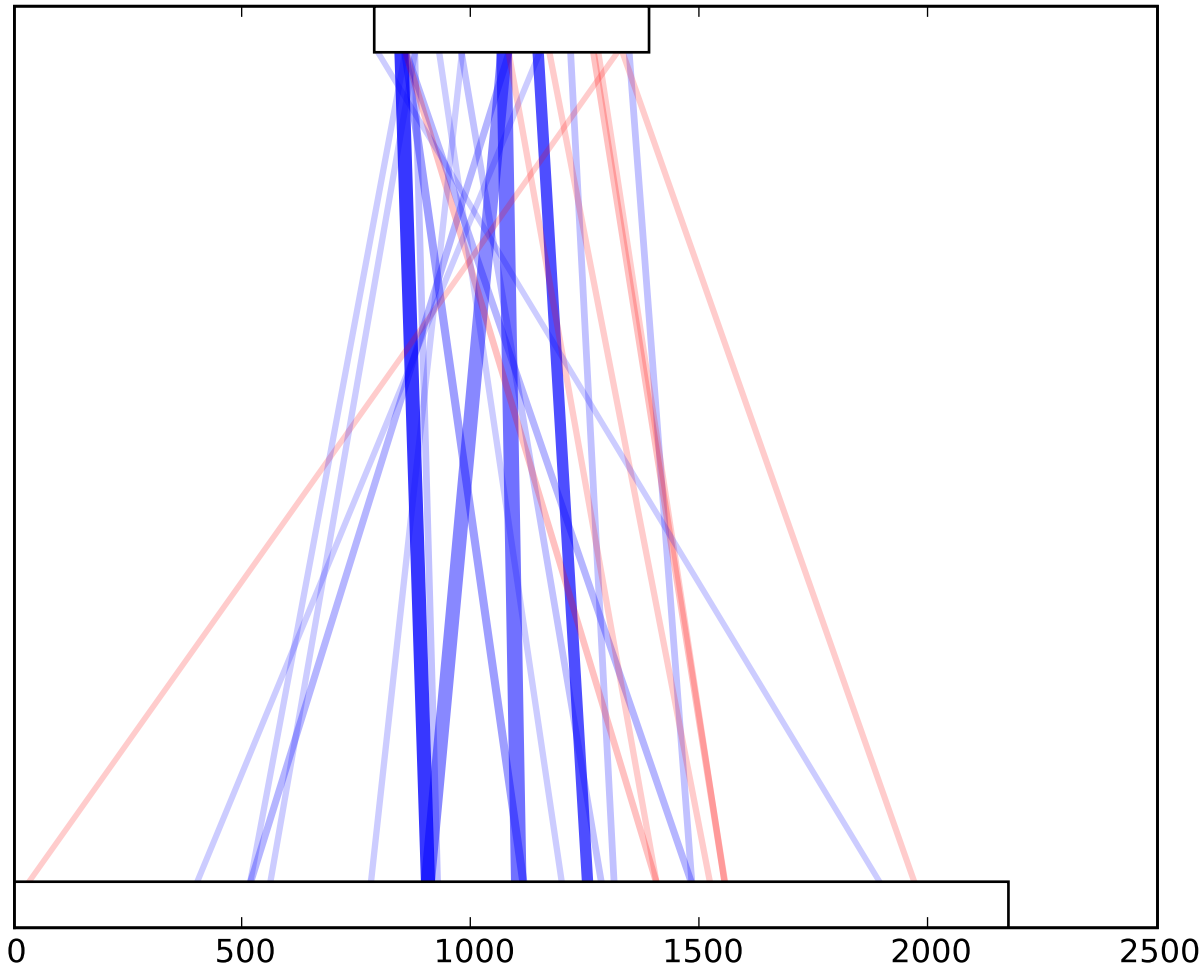

st37\_dmel\_themira\_putris\_blastmap\_9.pdf

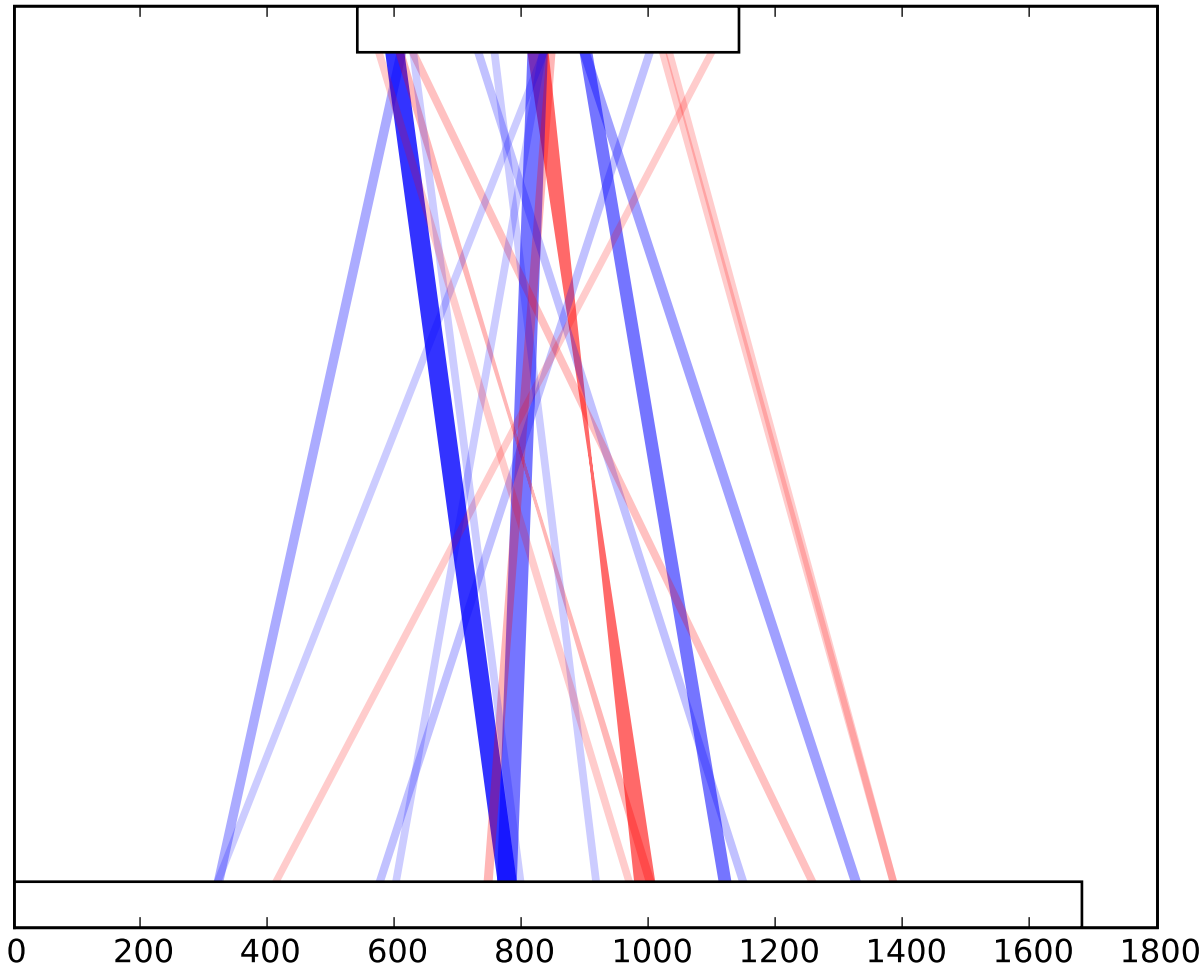



st46\_dmel\_dpse\_blastmap\_9.pdf

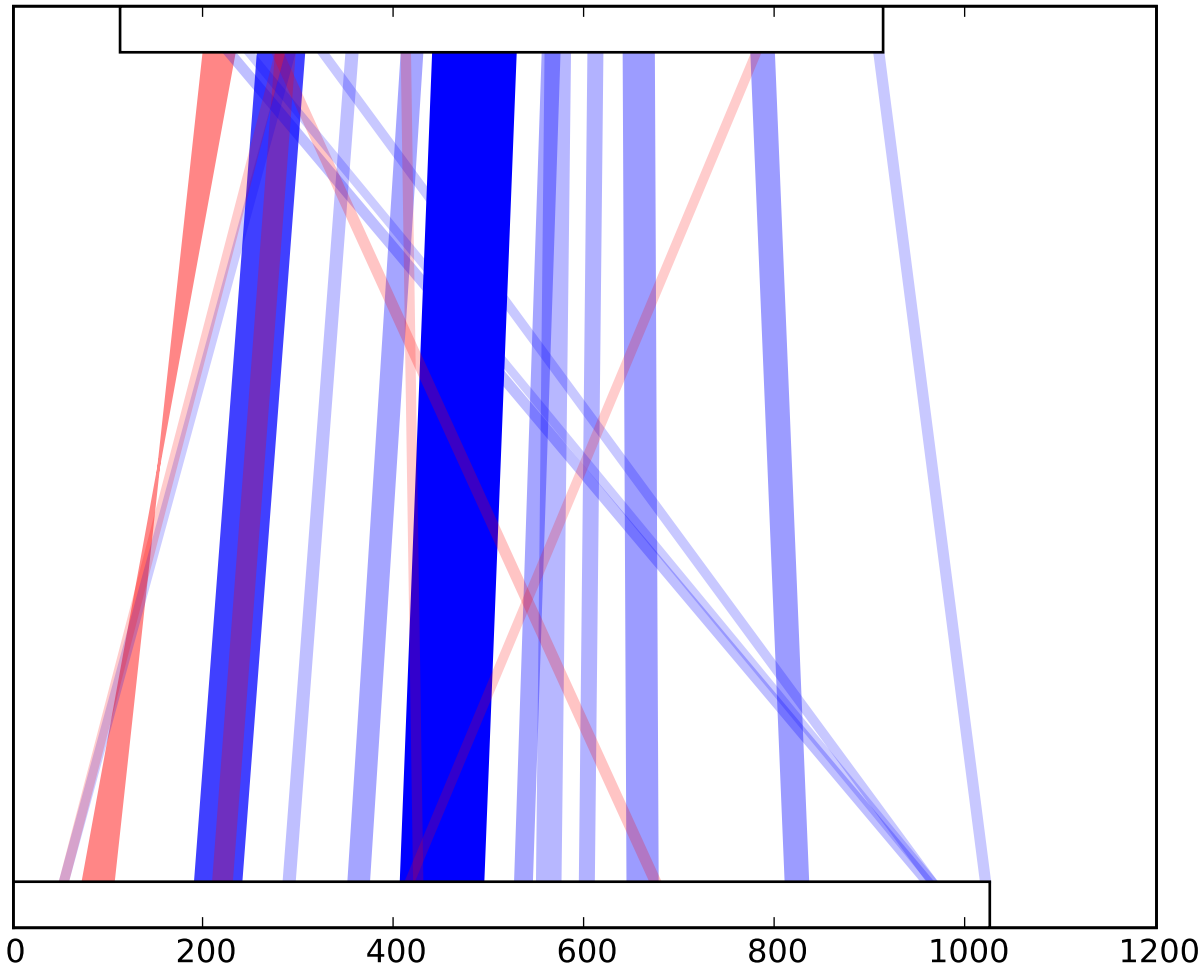

st46\_dmel\_dvir\_blastmap\_9.pdf

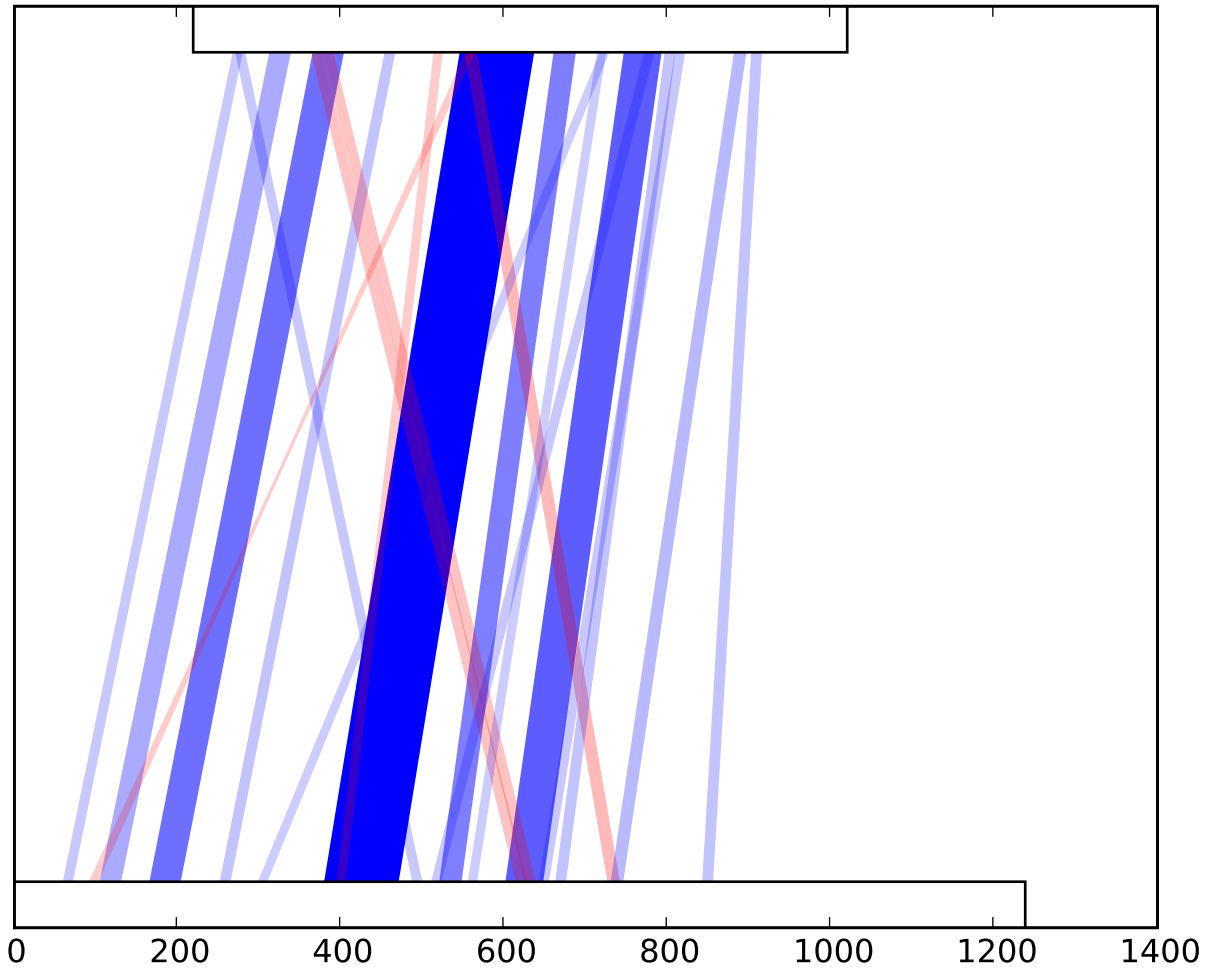

st46\_dmel\_sepsis\_cynipsea\_blastmap\_9.pdf

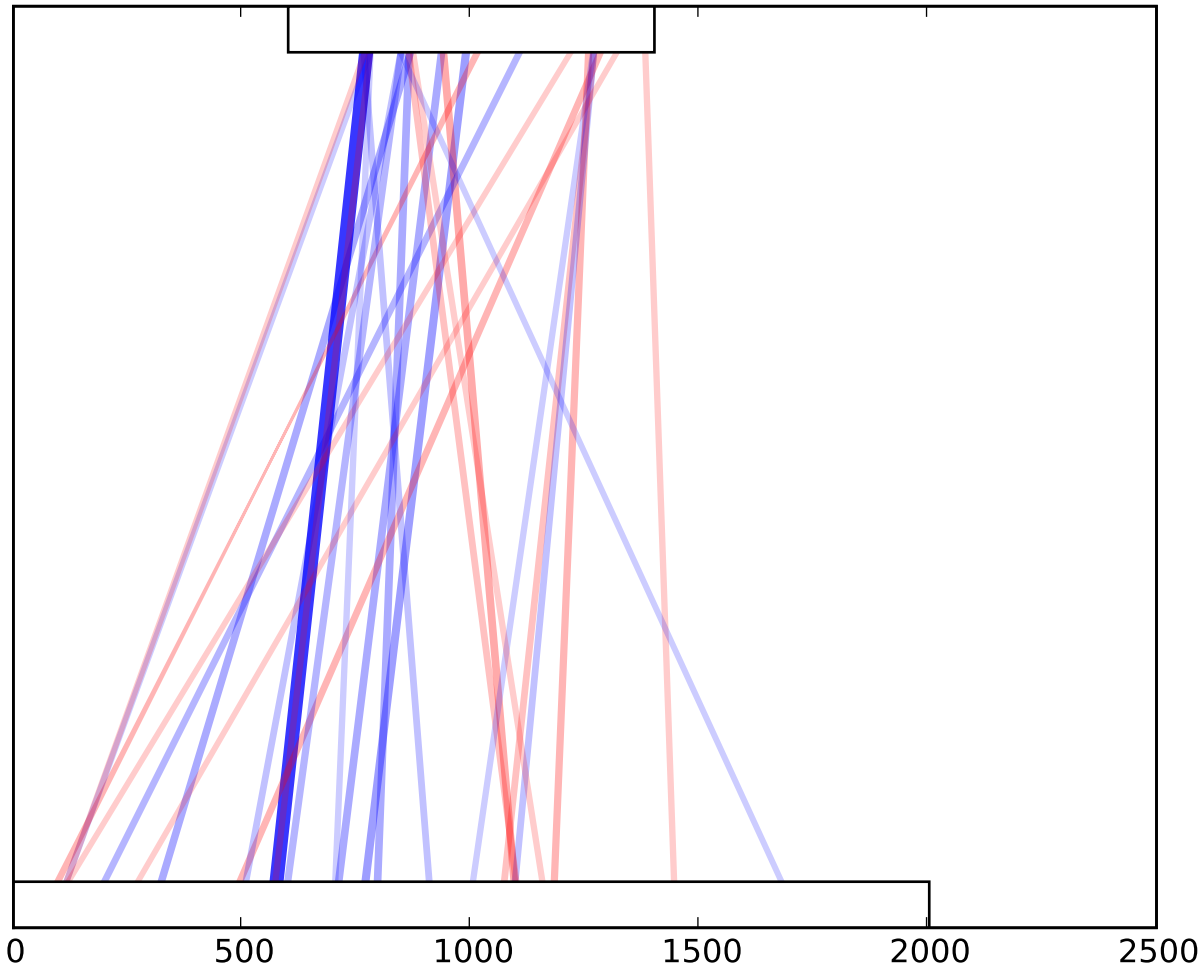

st46\_dmel\_themira\_putris\_blastmap\_9.pdf

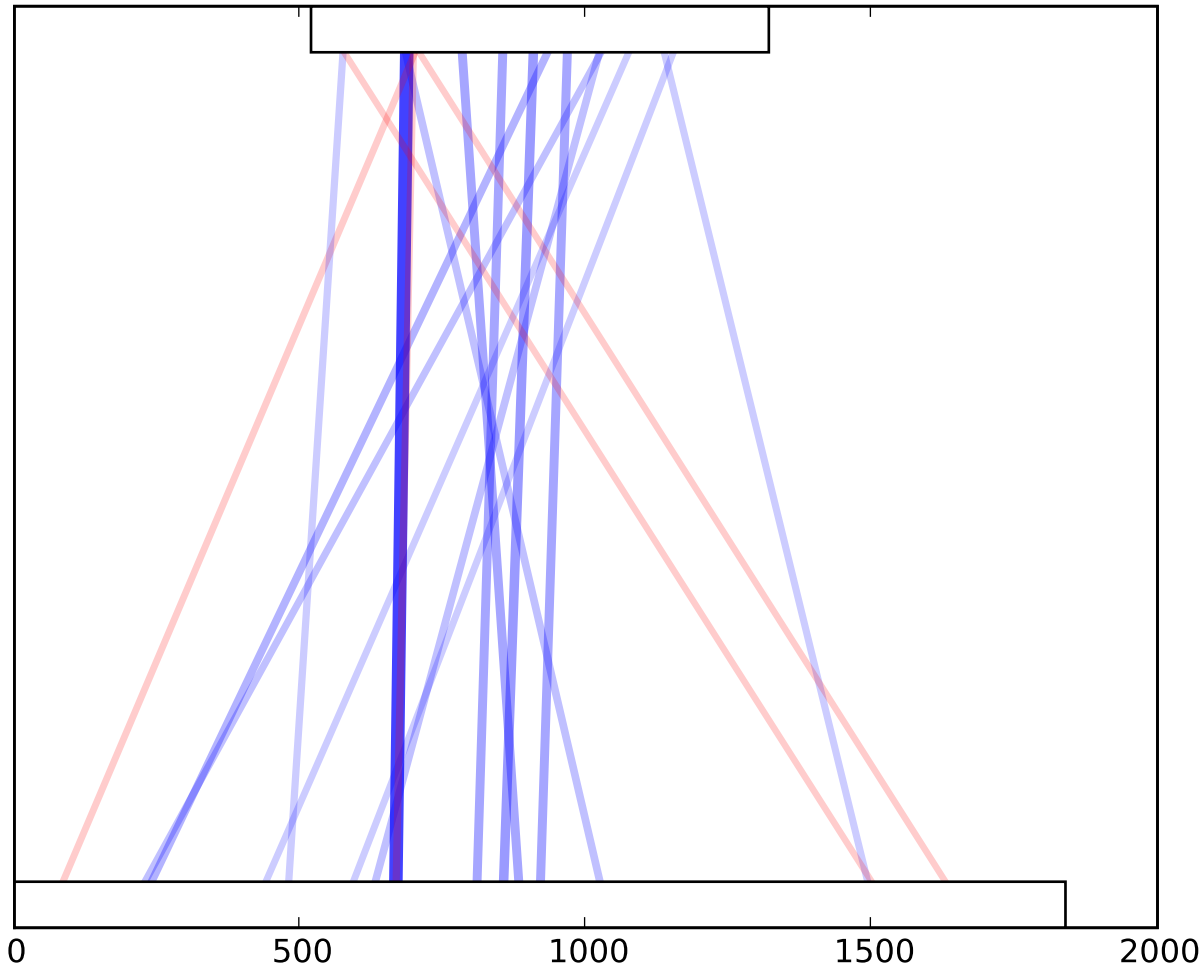

MHE\_dmel\_dpse\_blastmap\_9.pdf

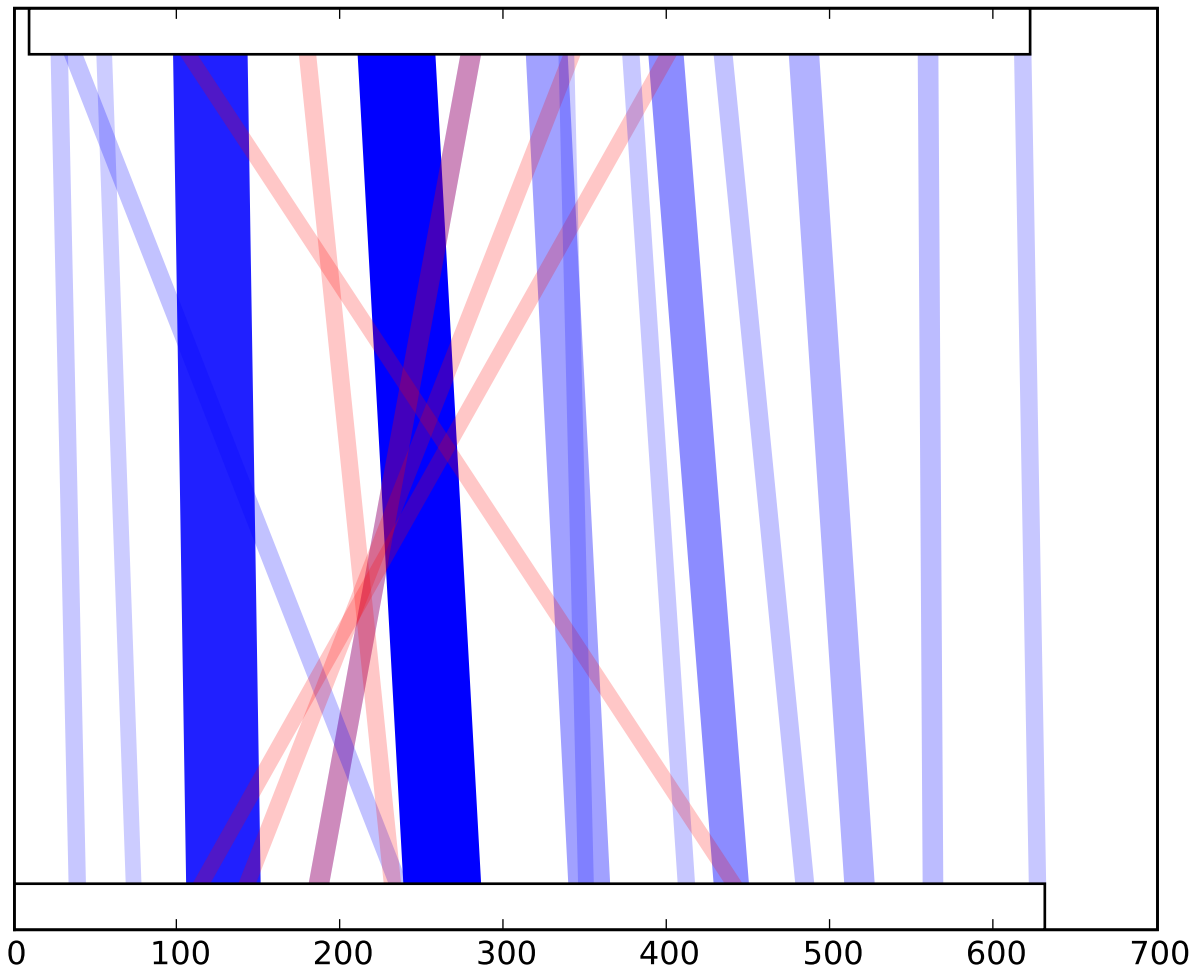

MHE\_dmel\_dvir\_blastmap\_9.pdf

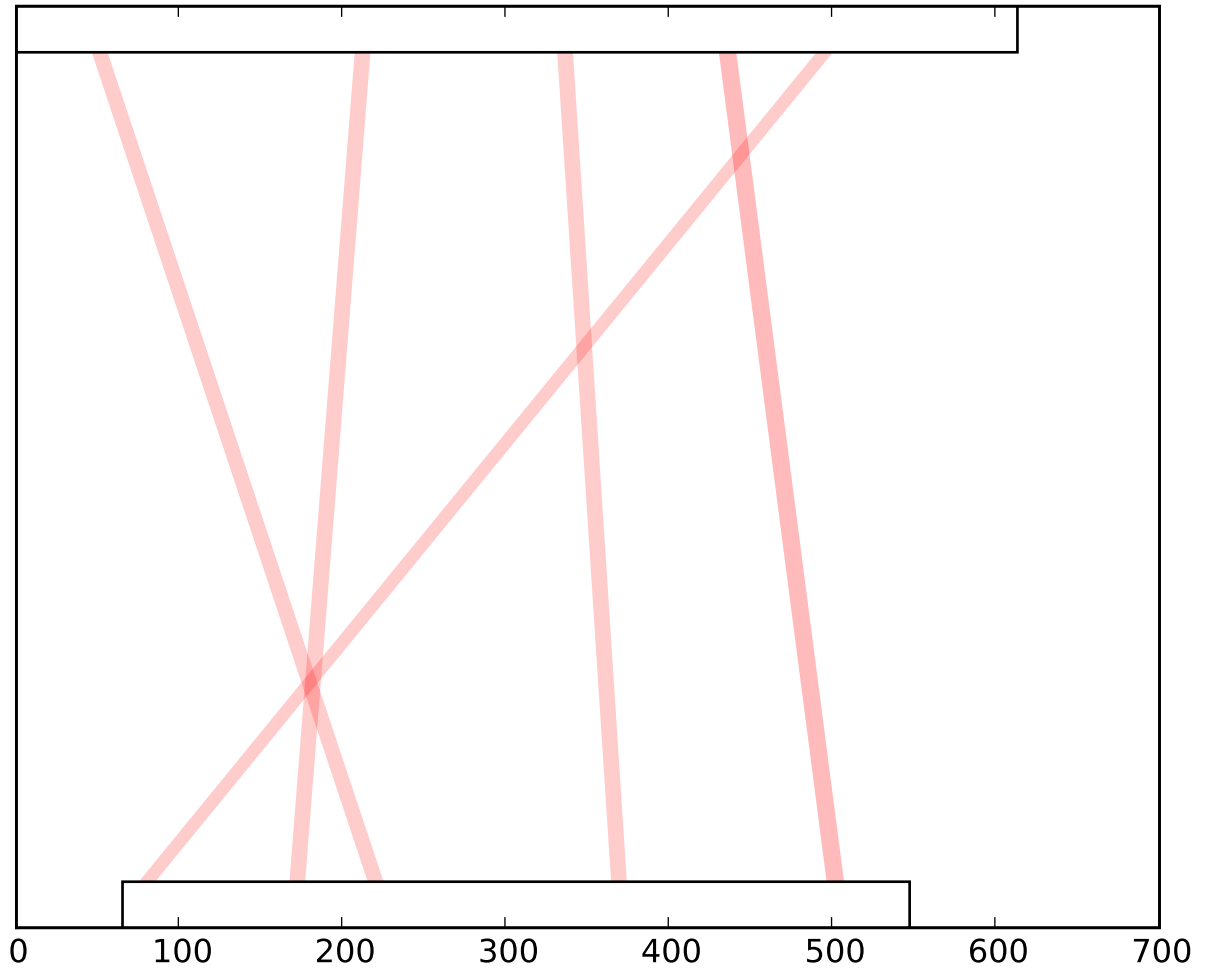

# MHE\_dmel\_sepsis\_cynipsea\_blastmap\_9.pdf

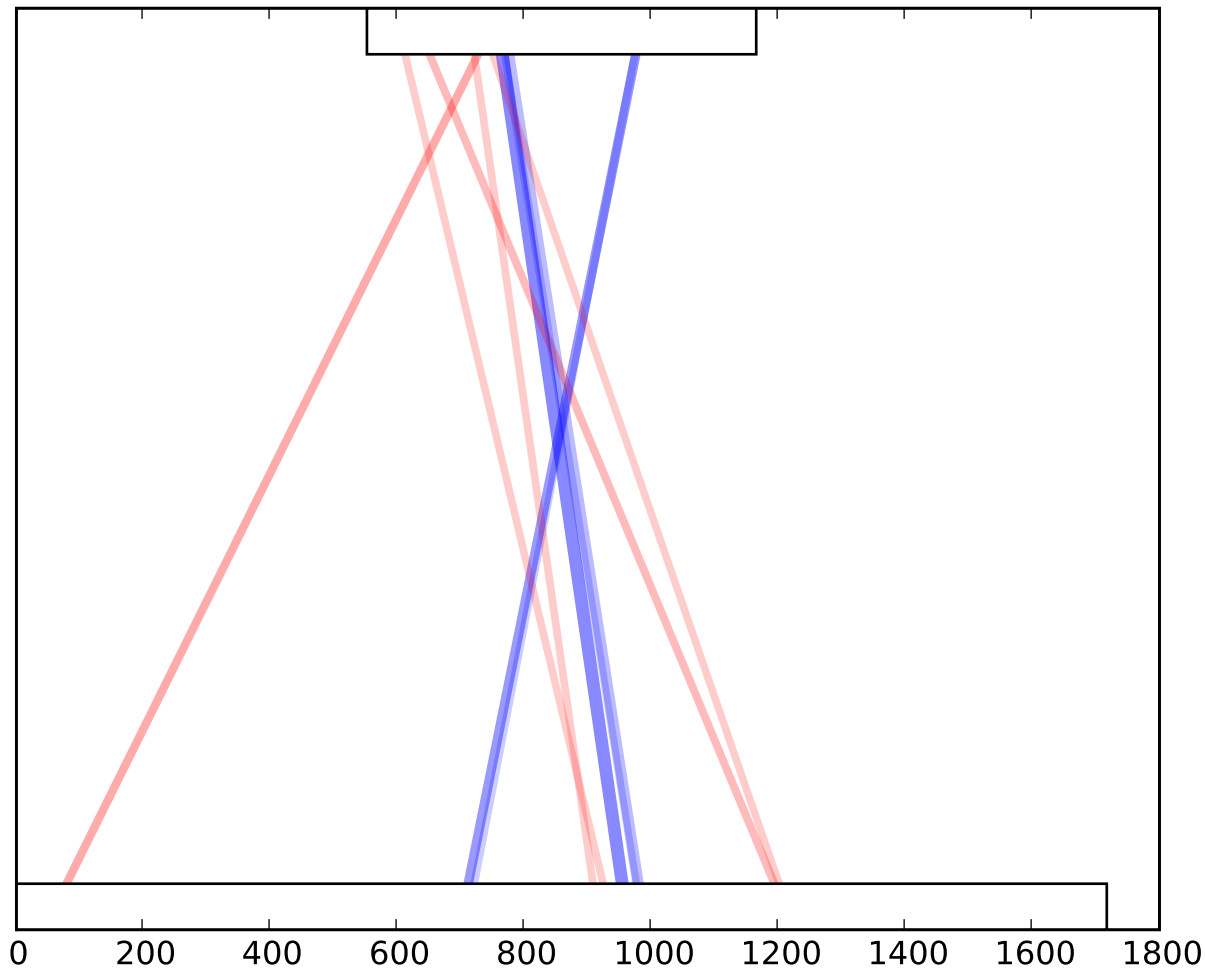

# MHE\_dmel\_themira\_putris\_blastmap\_9.pdf

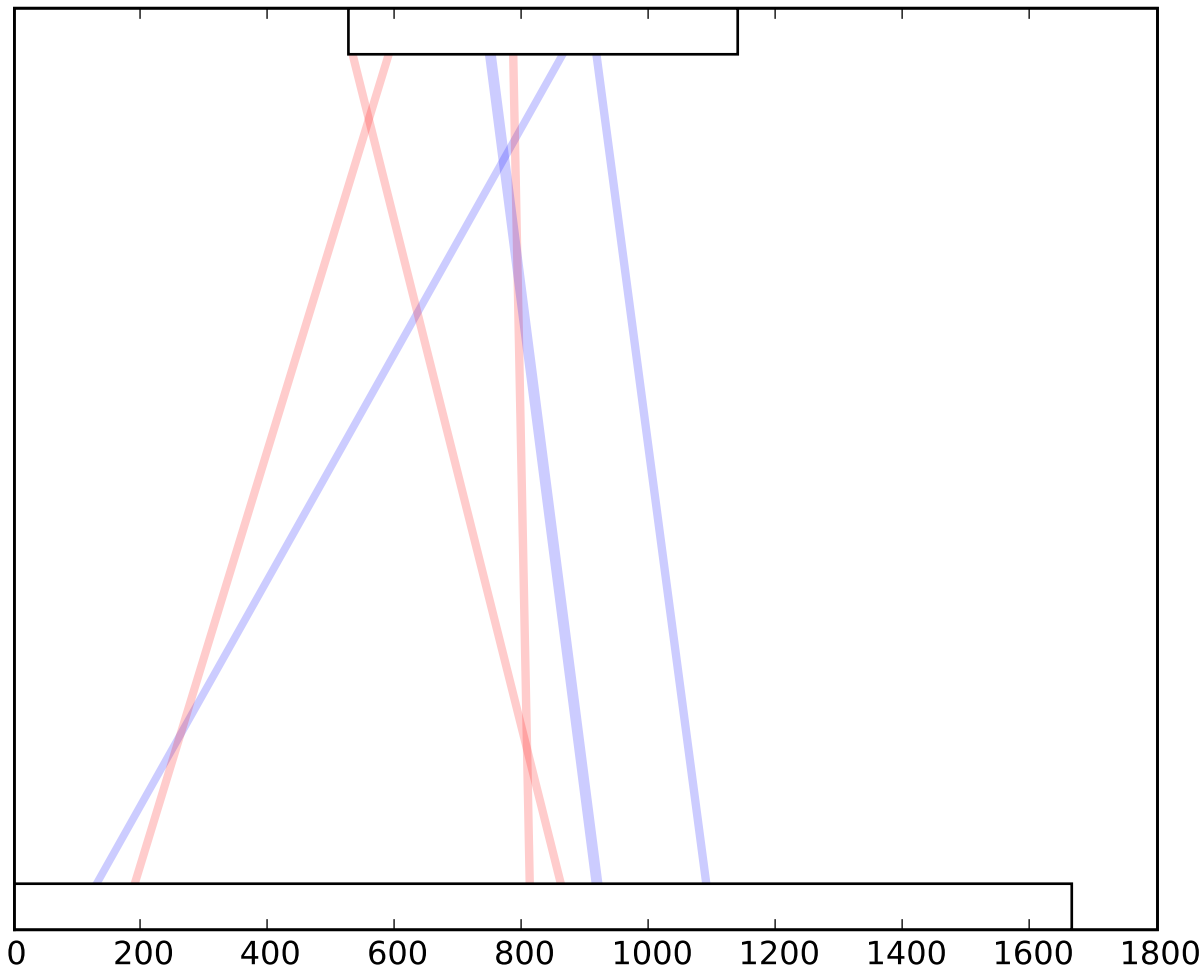



st2\_dmel\_dpse\_blastmap\_7.pdf

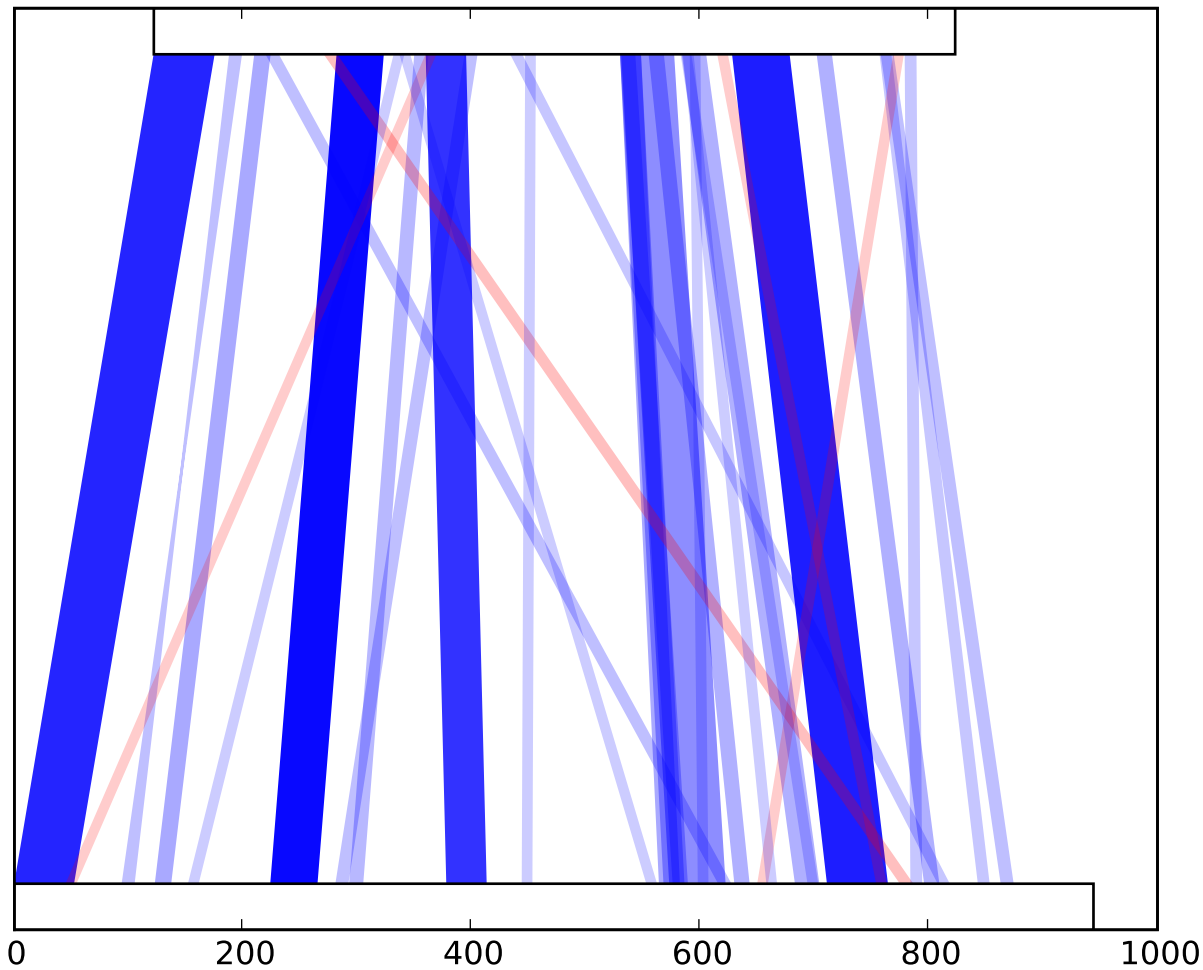

st2\_dmel\_dvir\_blastmap\_7.pdf

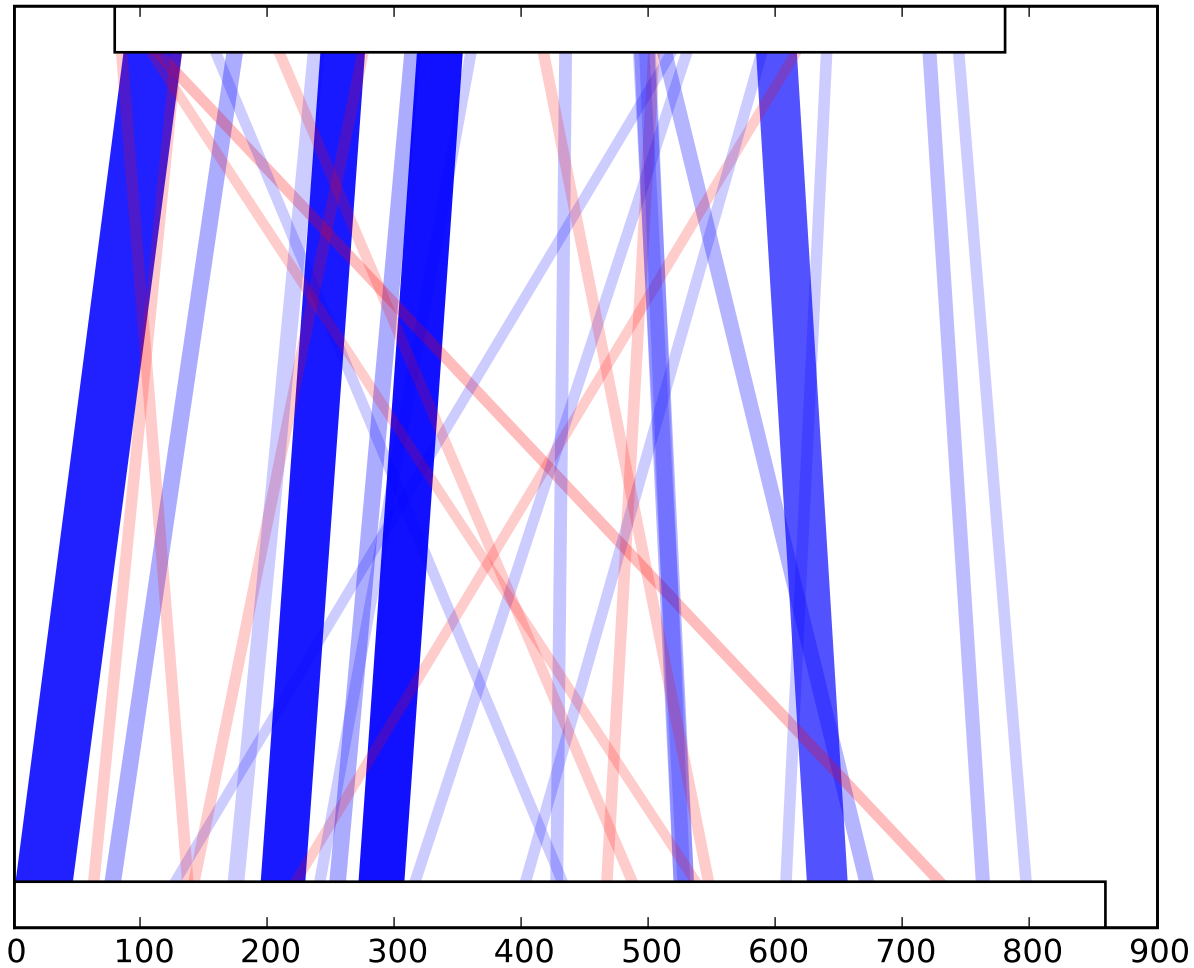

st2\_dmel\_sepsis\_cynipsea\_blastmap\_7.pdf



st2\_dmel\_themira\_putris\_blastmap\_7.pdf

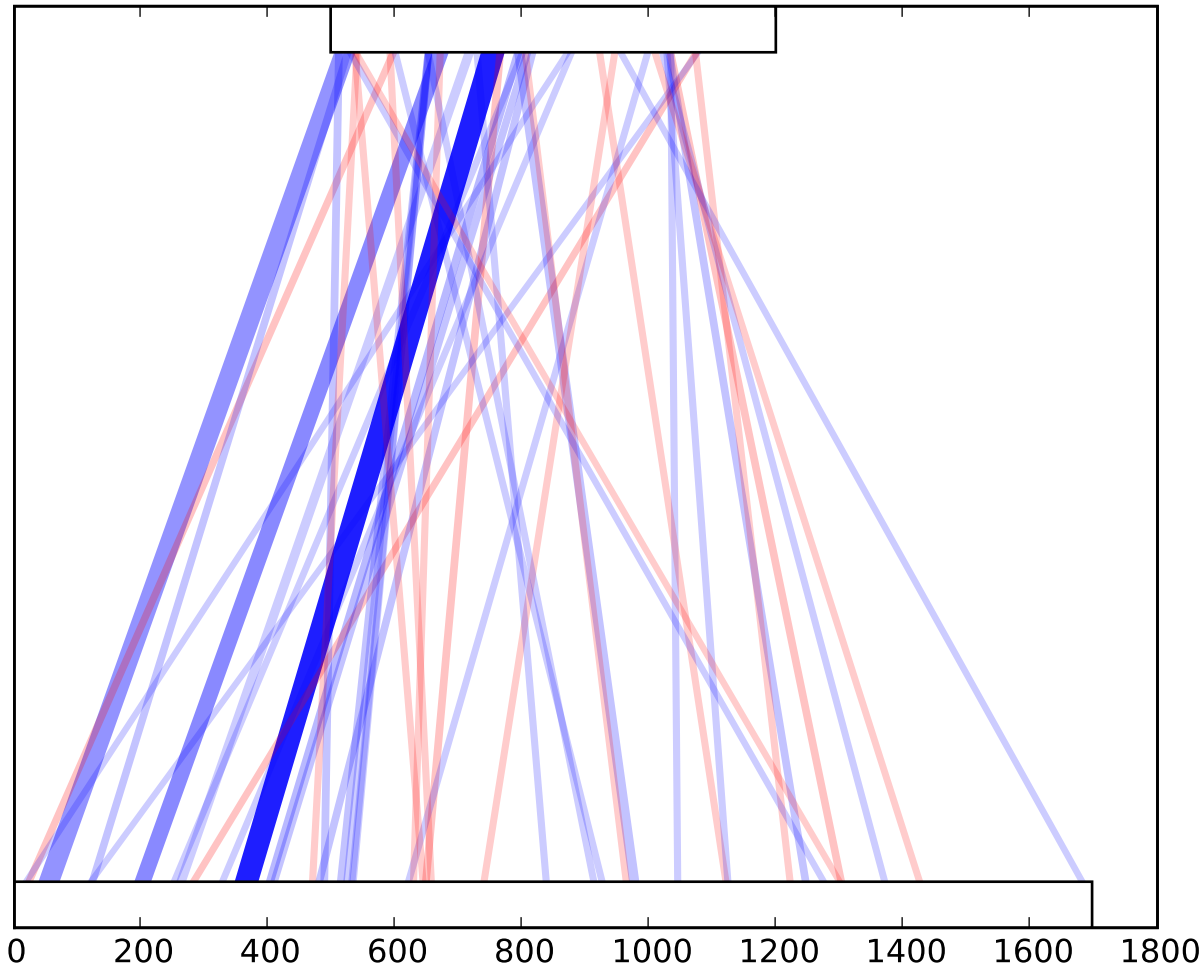

st37\_dmel\_dpse\_blastmap\_7.pdf

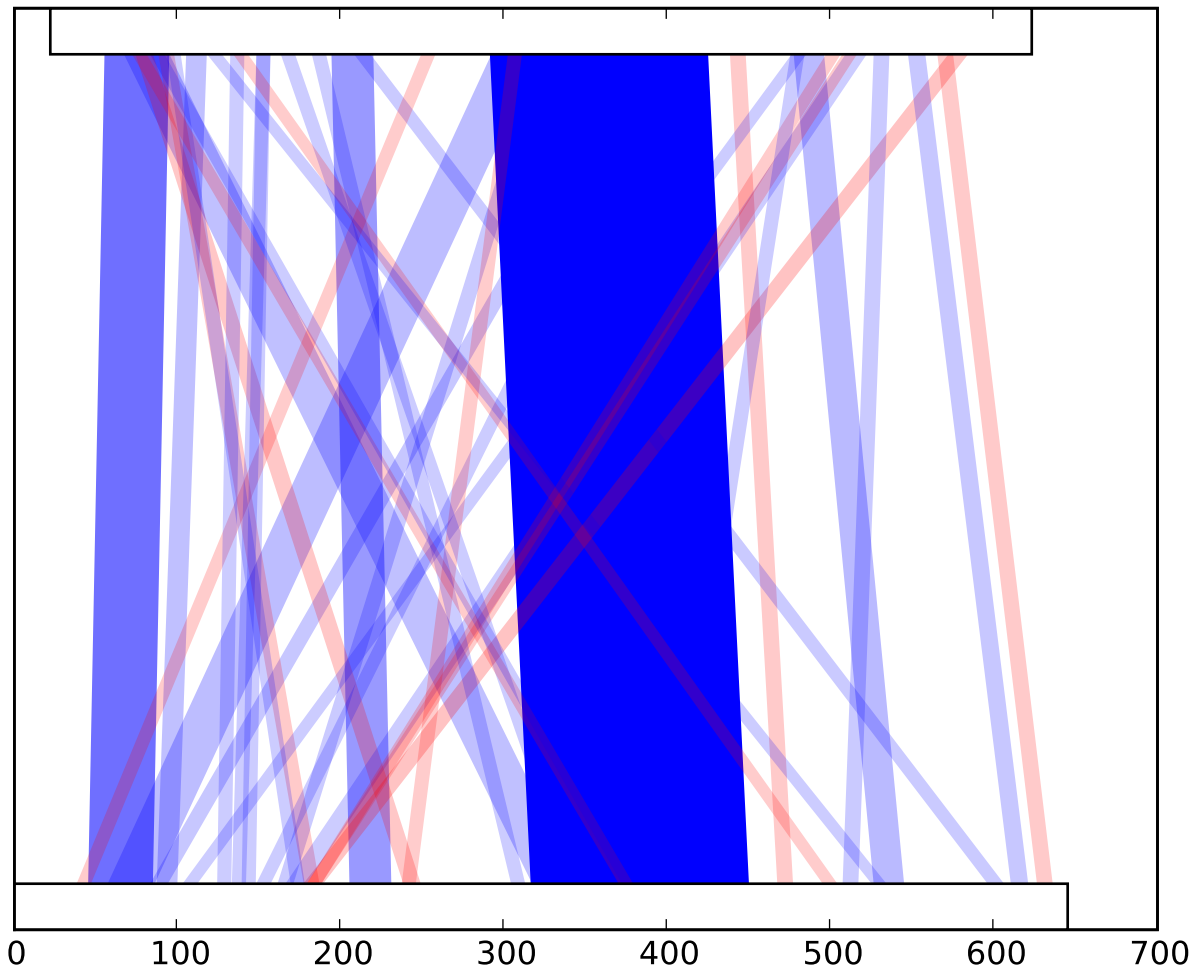

st37\_dmel\_dvir\_blastmap\_7.pdf

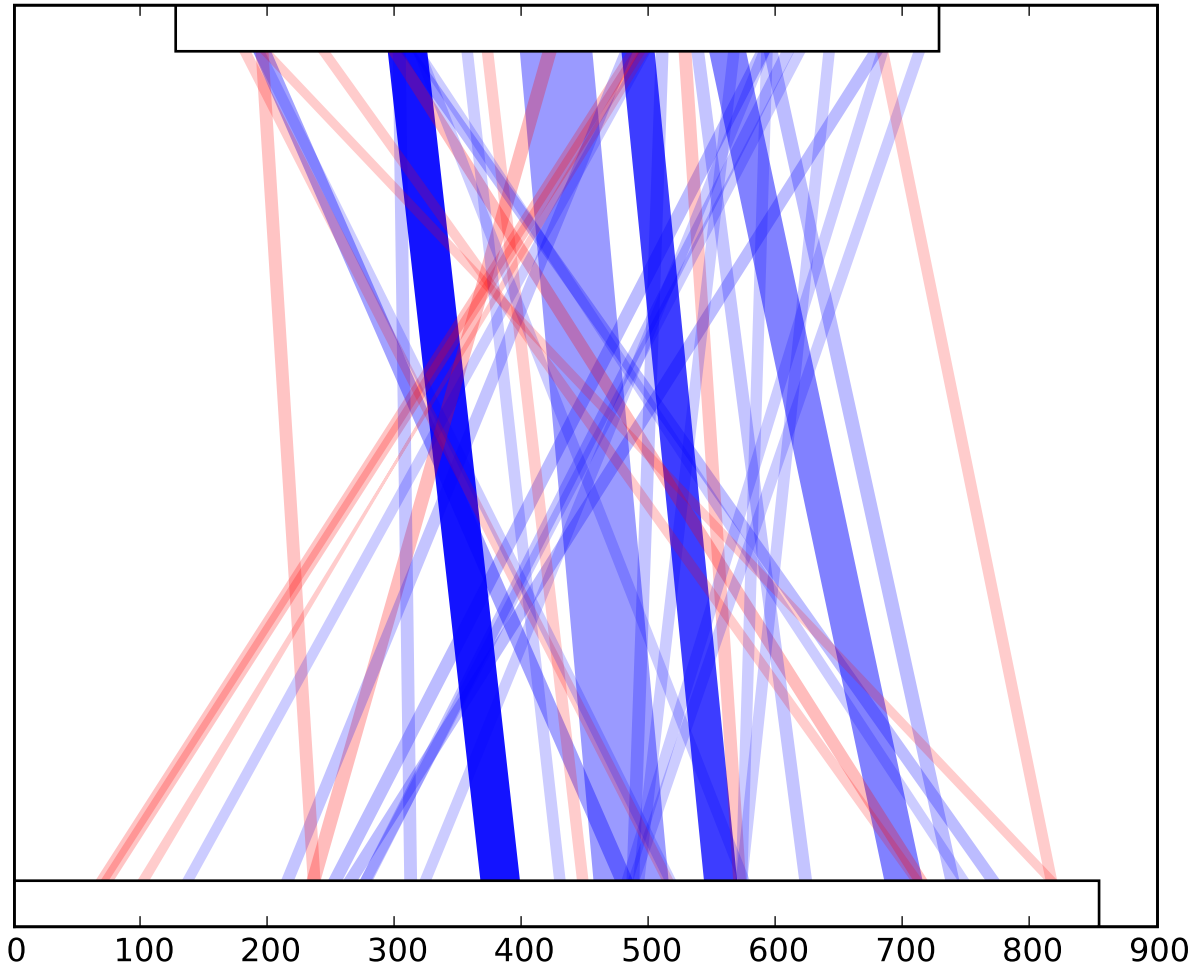

st37\_dmel\_sepsis\_cynipsea\_blastmap\_7.pdf

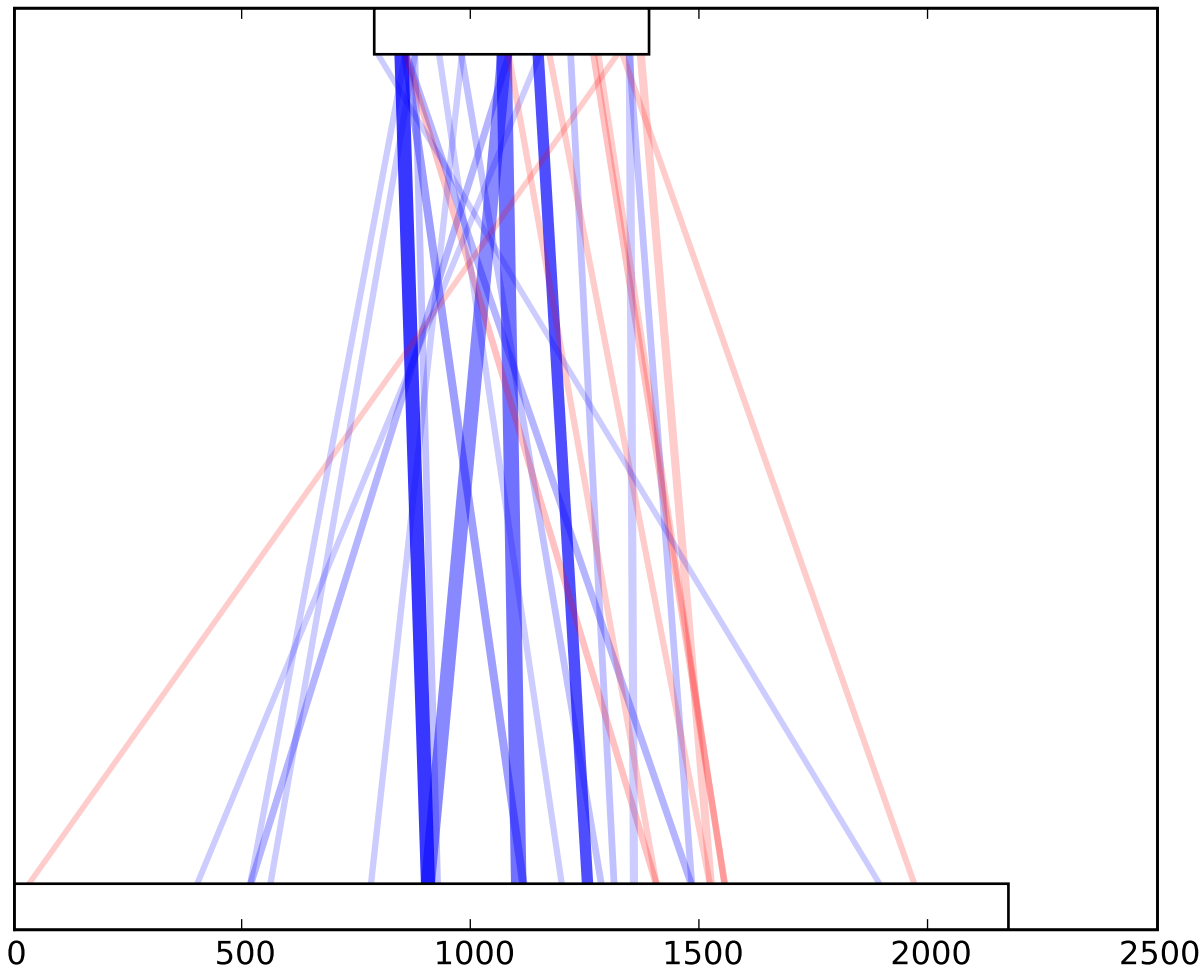

st37\_dmel\_themira\_putris\_blastmap\_7.pdf

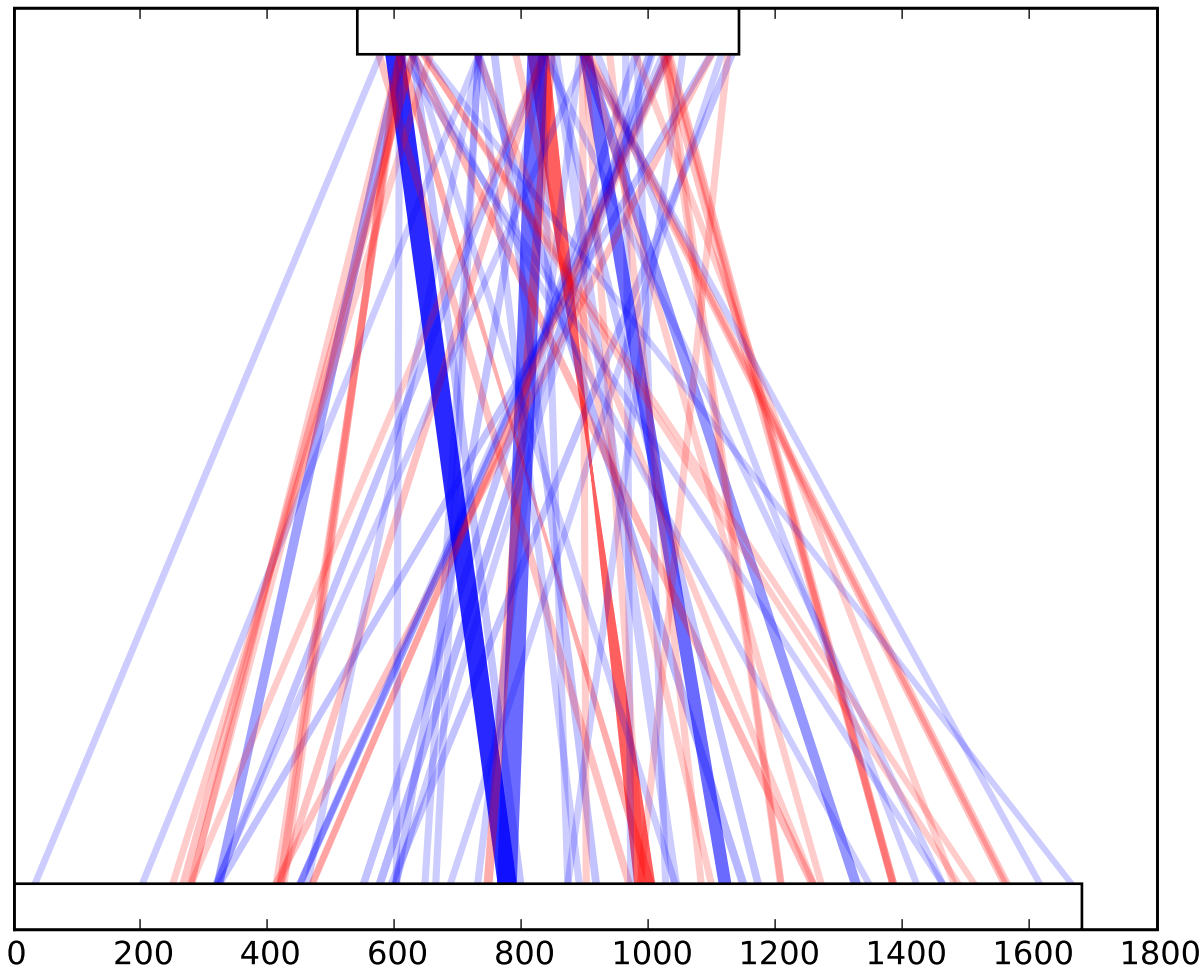



st46\_dmel\_dpse\_blastmap\_7.pdf

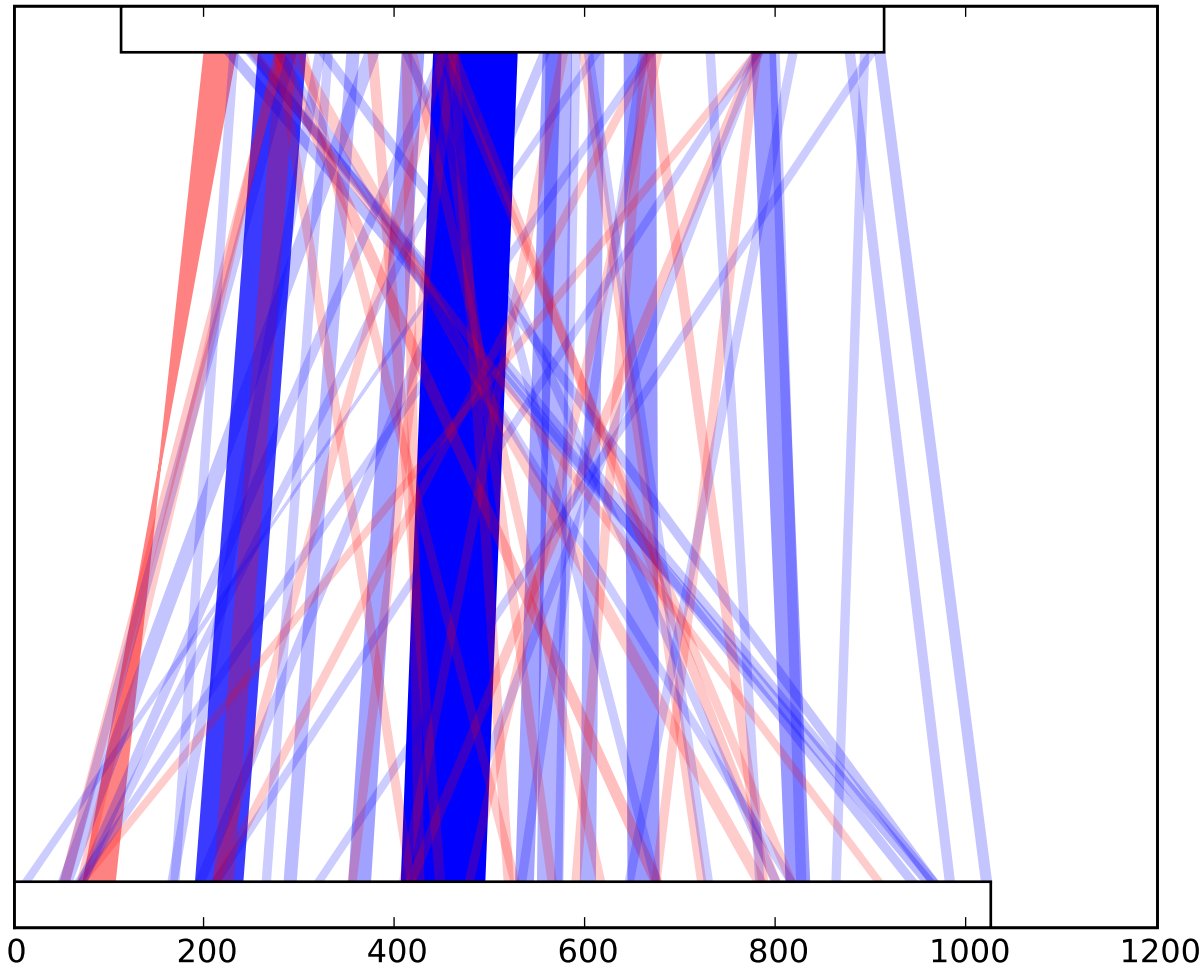

st46\_dmel\_dvir\_blastmap\_7.pdf

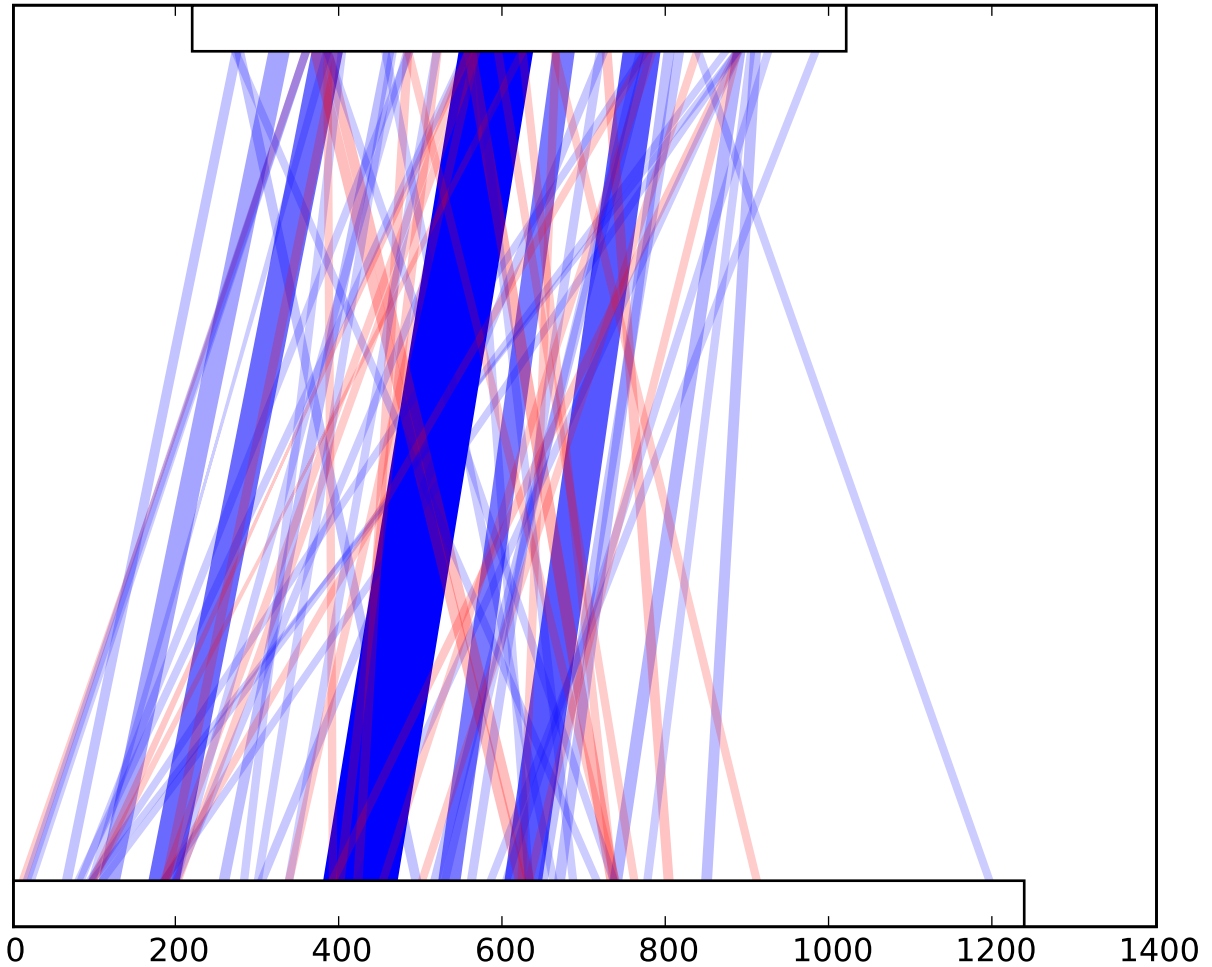

st46\_dmel\_sepsis\_cynipsea\_blastmap\_7.pdf

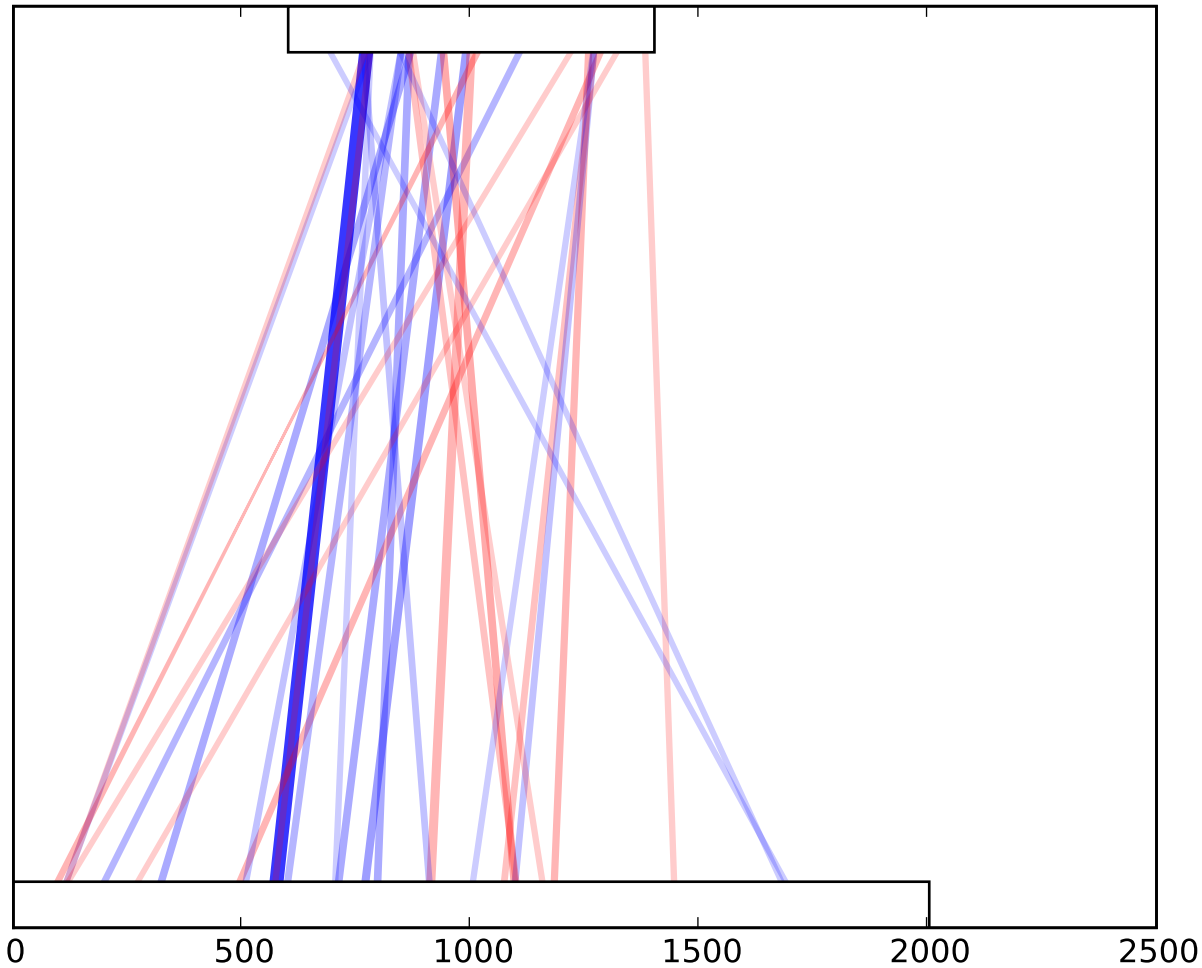

st46\_dmel\_themira\_putris\_blastmap\_7.pdf

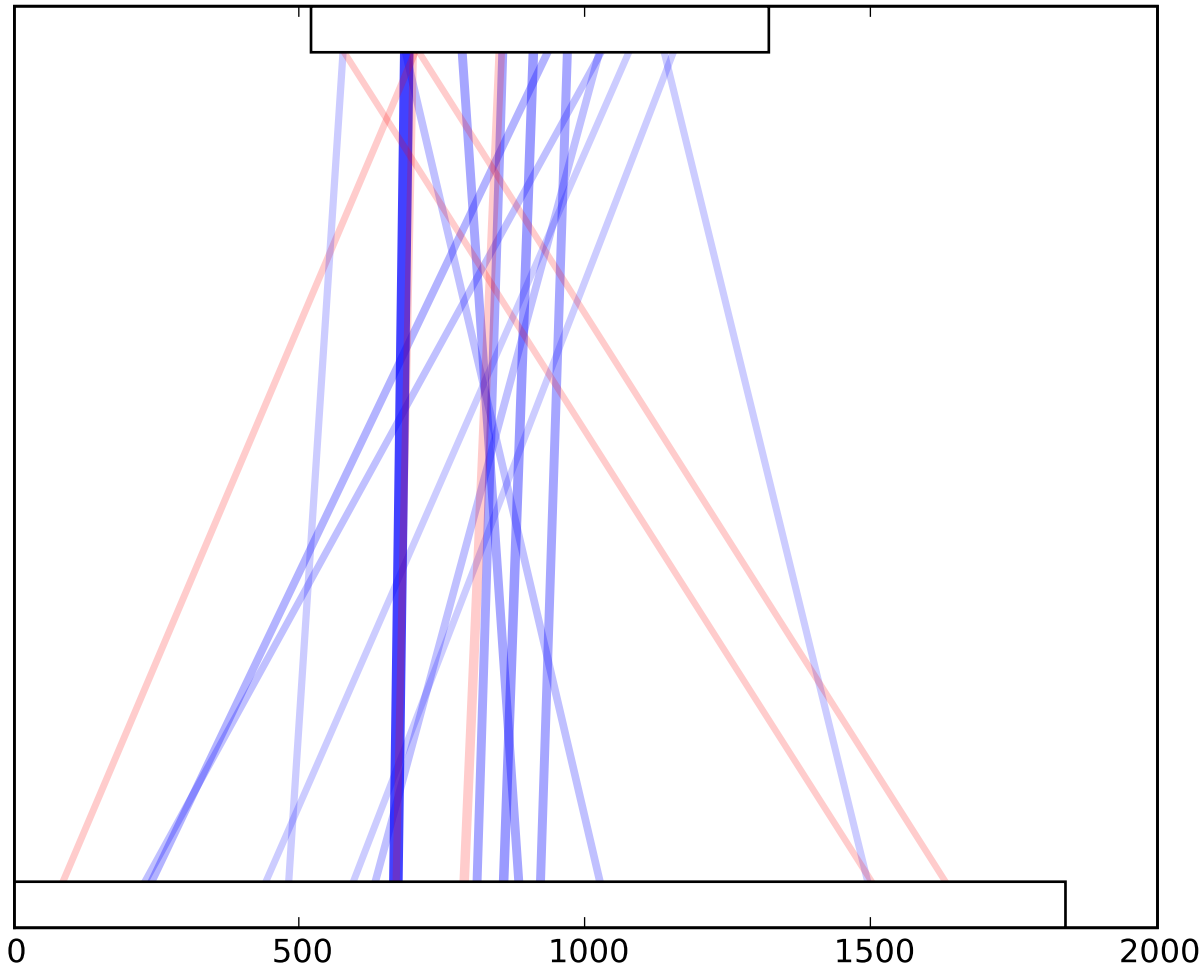

MHE\_dmel\_dpse\_blastmap\_7.pdf

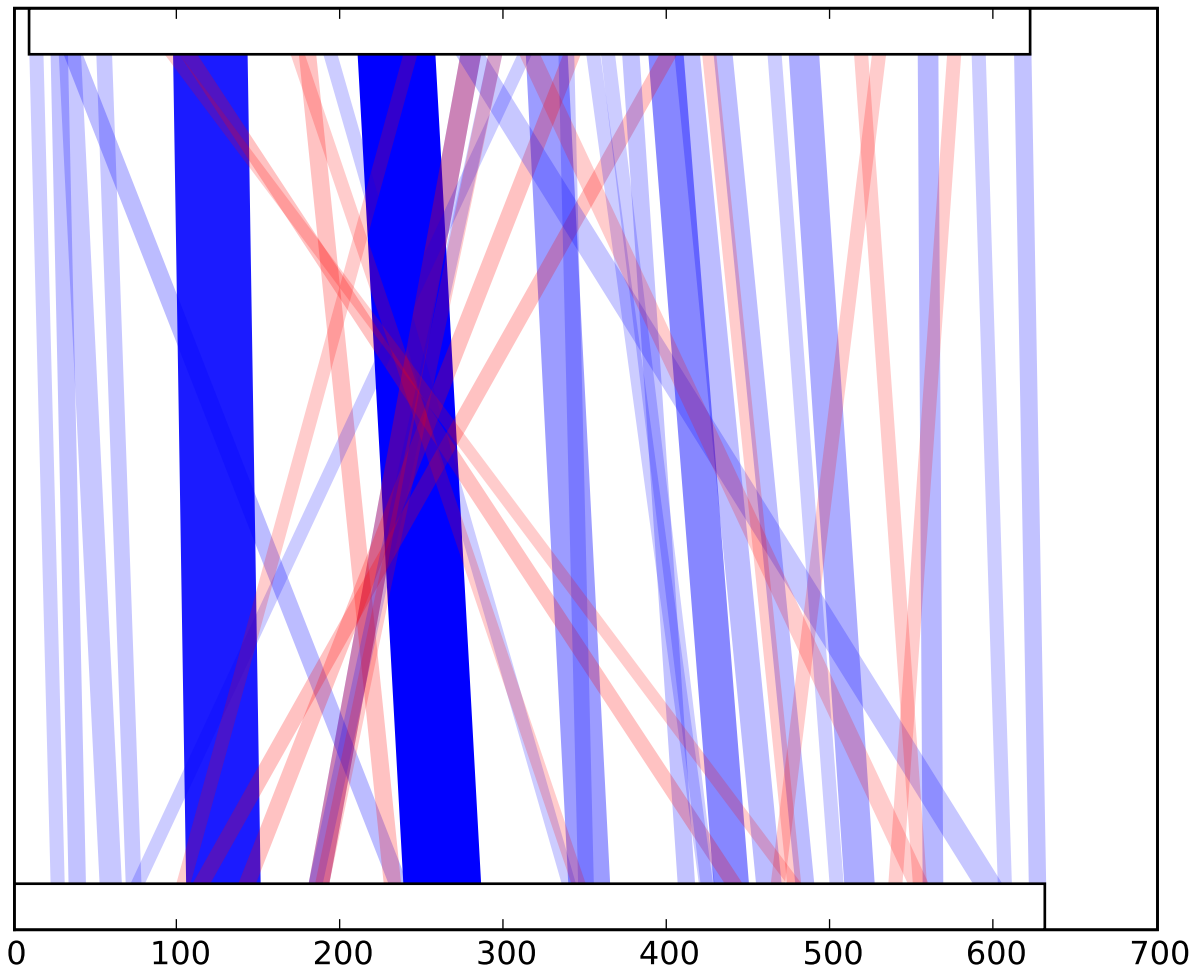

MHE\_dmel\_dvir\_blastmap\_7.pdf

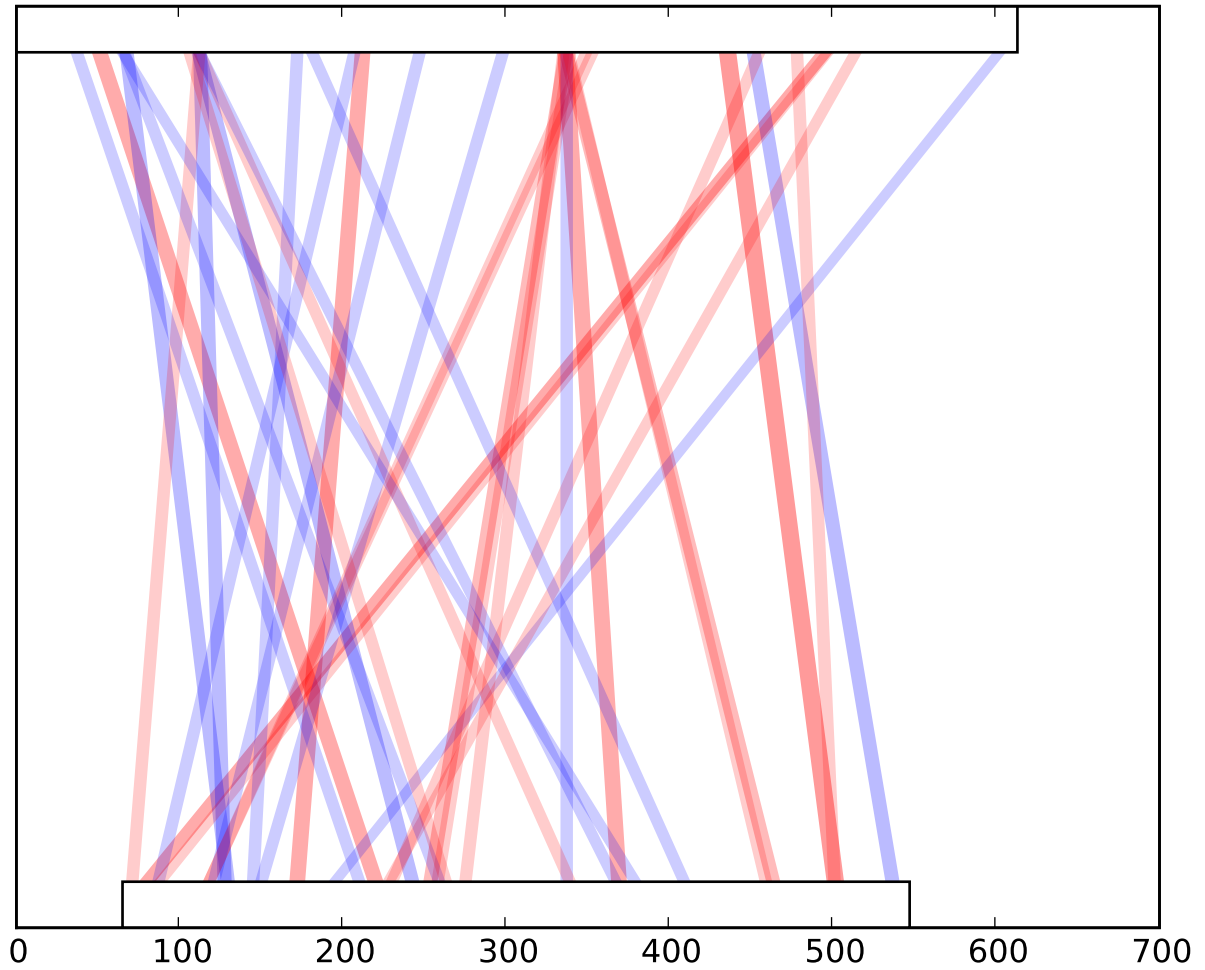

MHE\_dmel\_sepsis\_cynipsea\_blastmap\_7.pdf

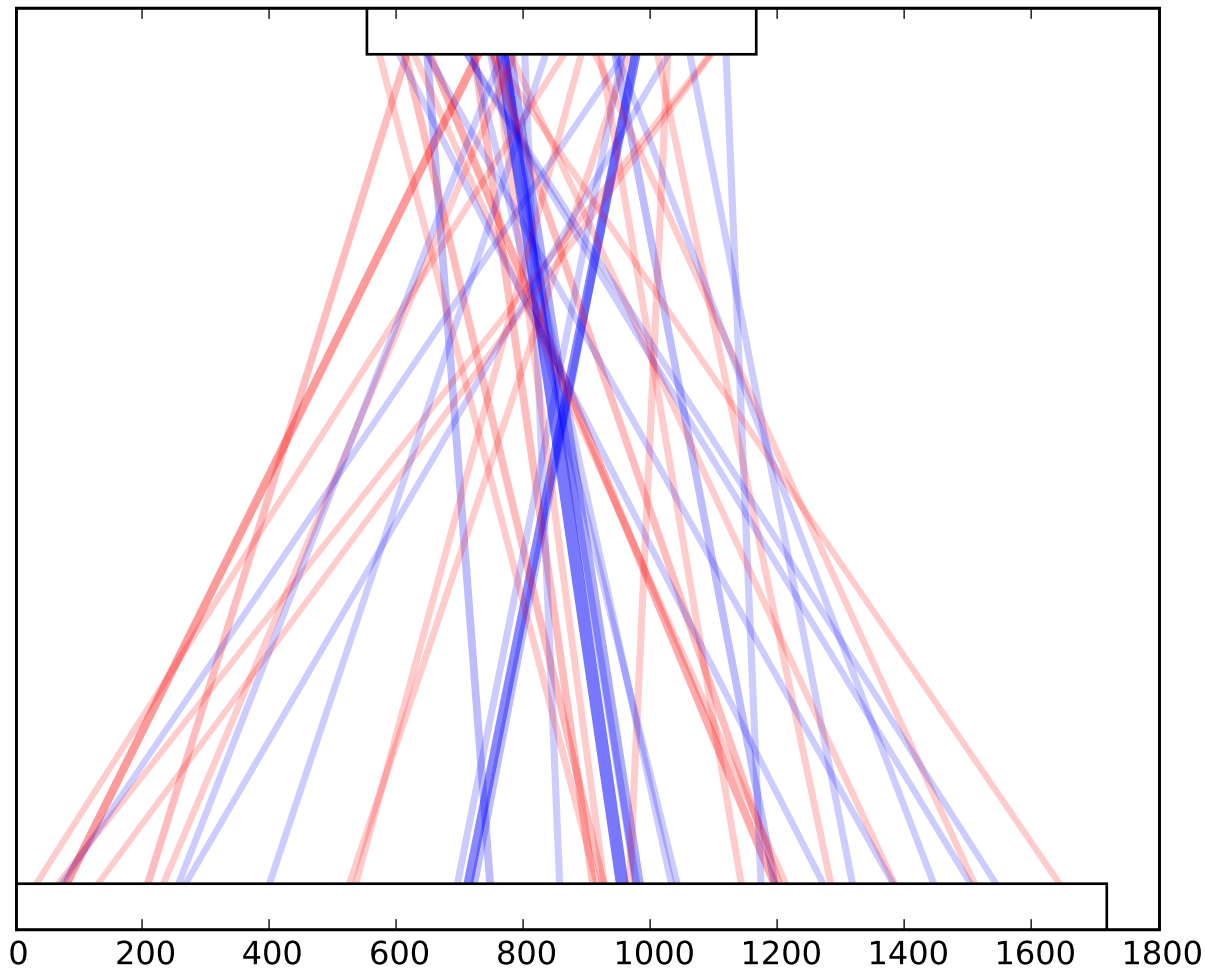

MHE\_dmel\_themira\_putris\_blastmap\_7.pdf

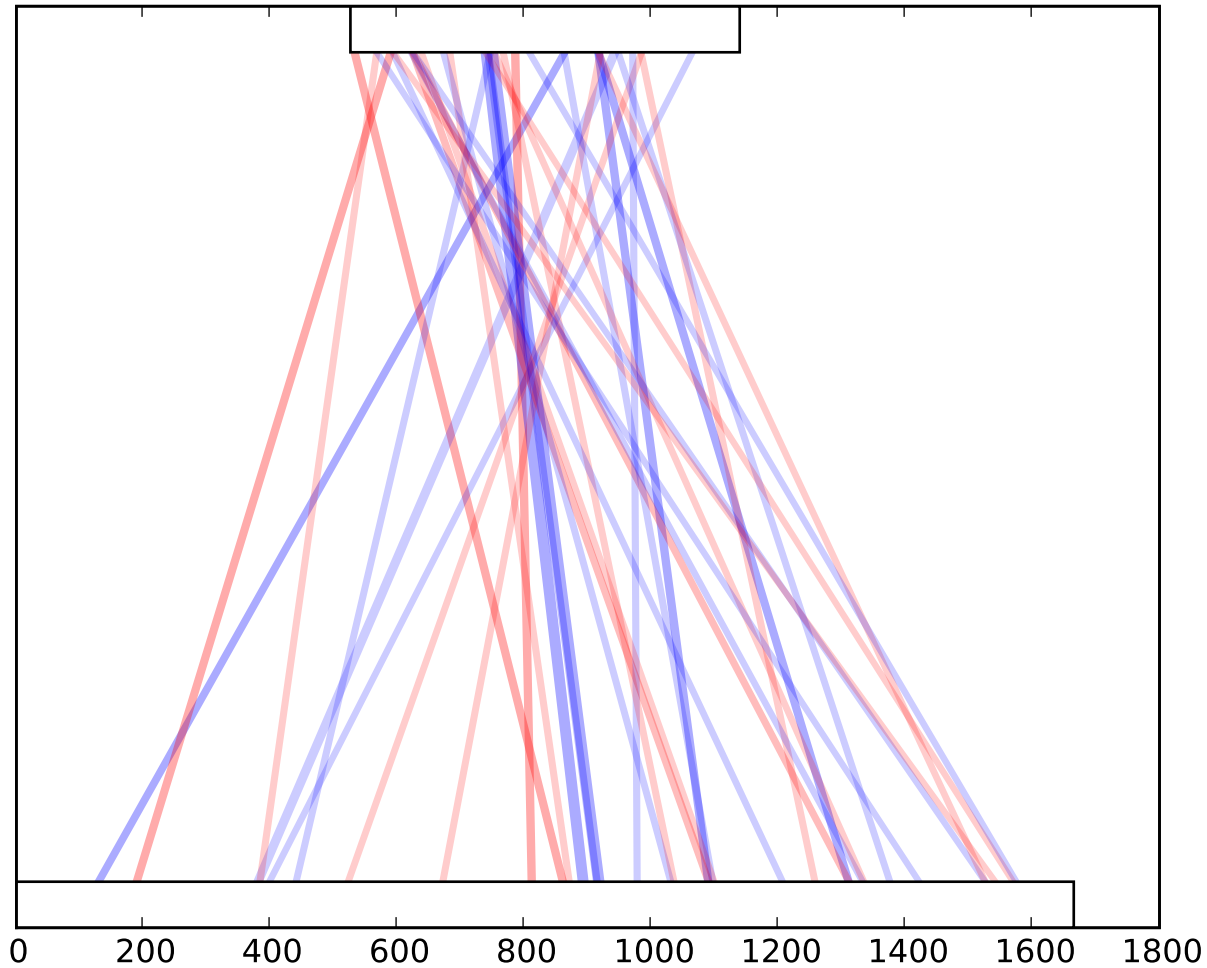



st2\_dmel\_dpse\_20-0.60-0.50.pdf

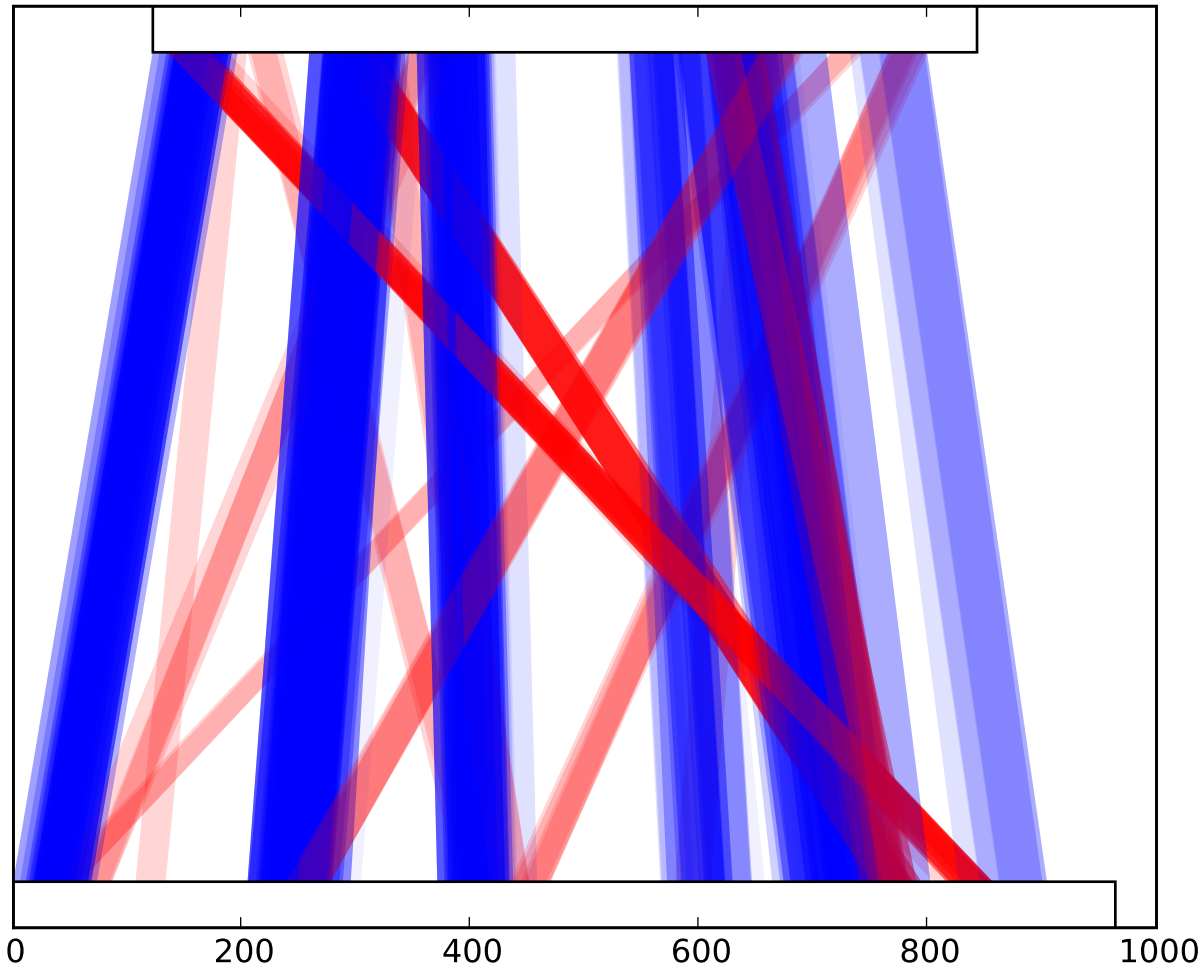

st2\_dmel\_dvir\_20-0.60-0.50.pdf

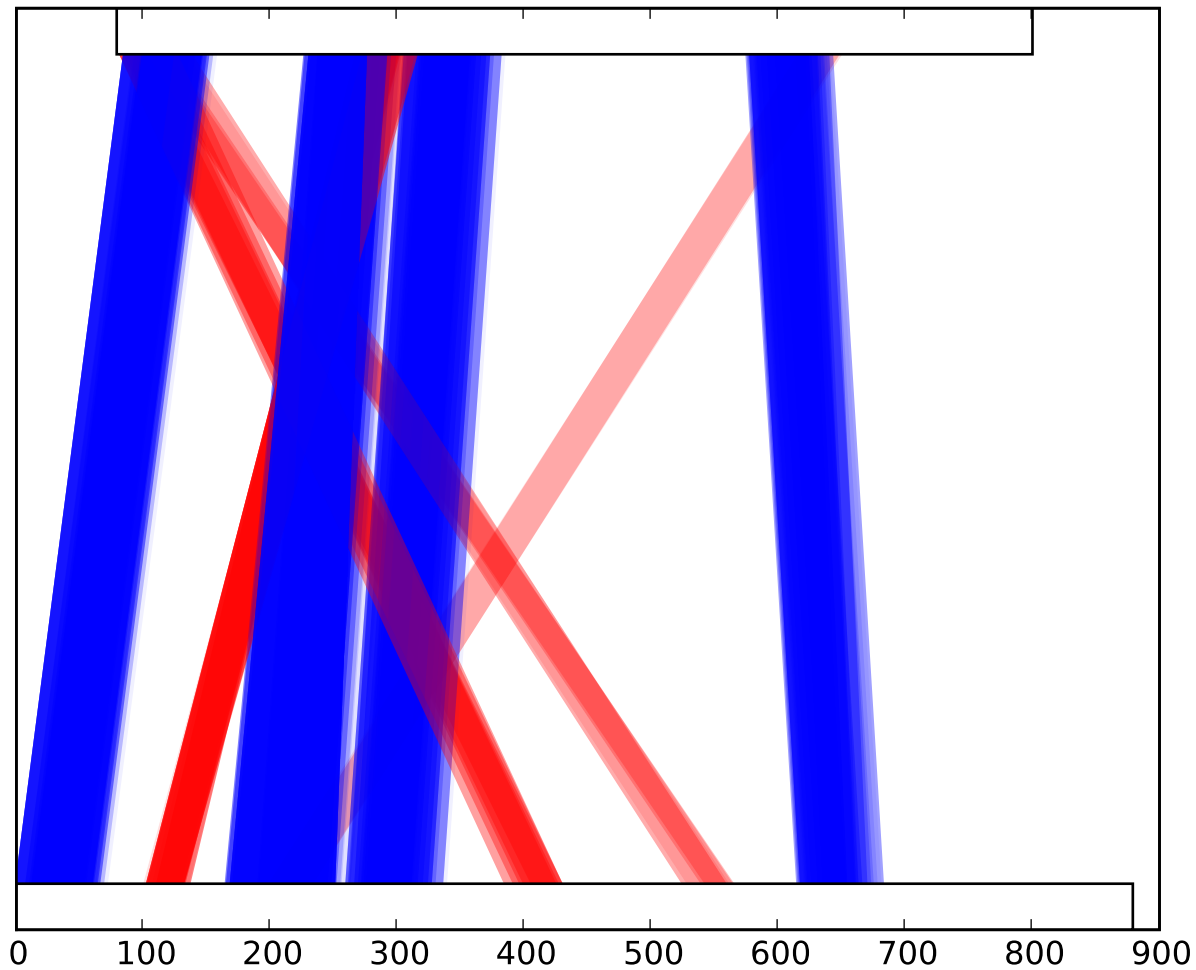

st2\_dmel\_sepsis\_cynipsea\_20-0.60-0.50.pdf

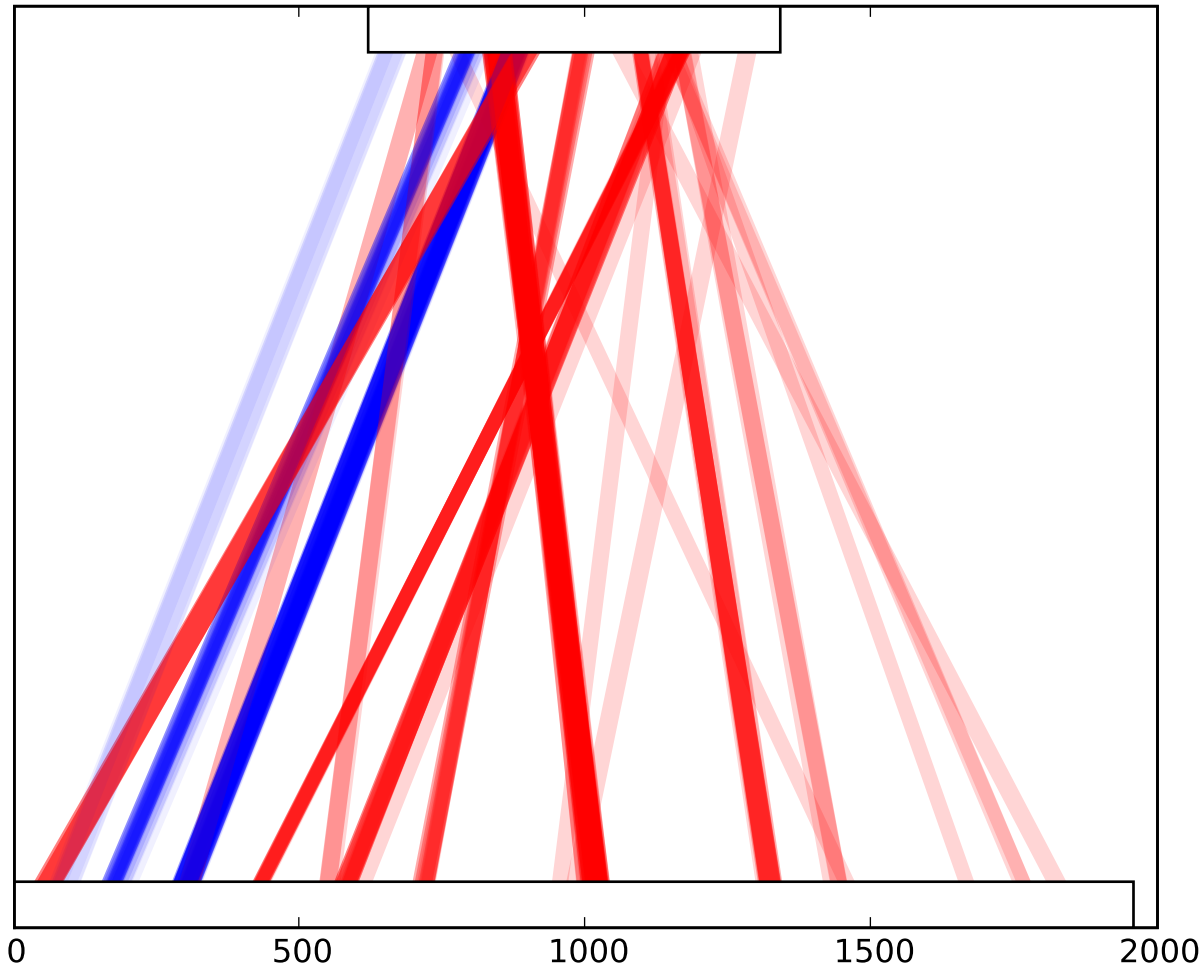

st2\_dmel\_themira\_putris\_20-0.60-0.50.pdf

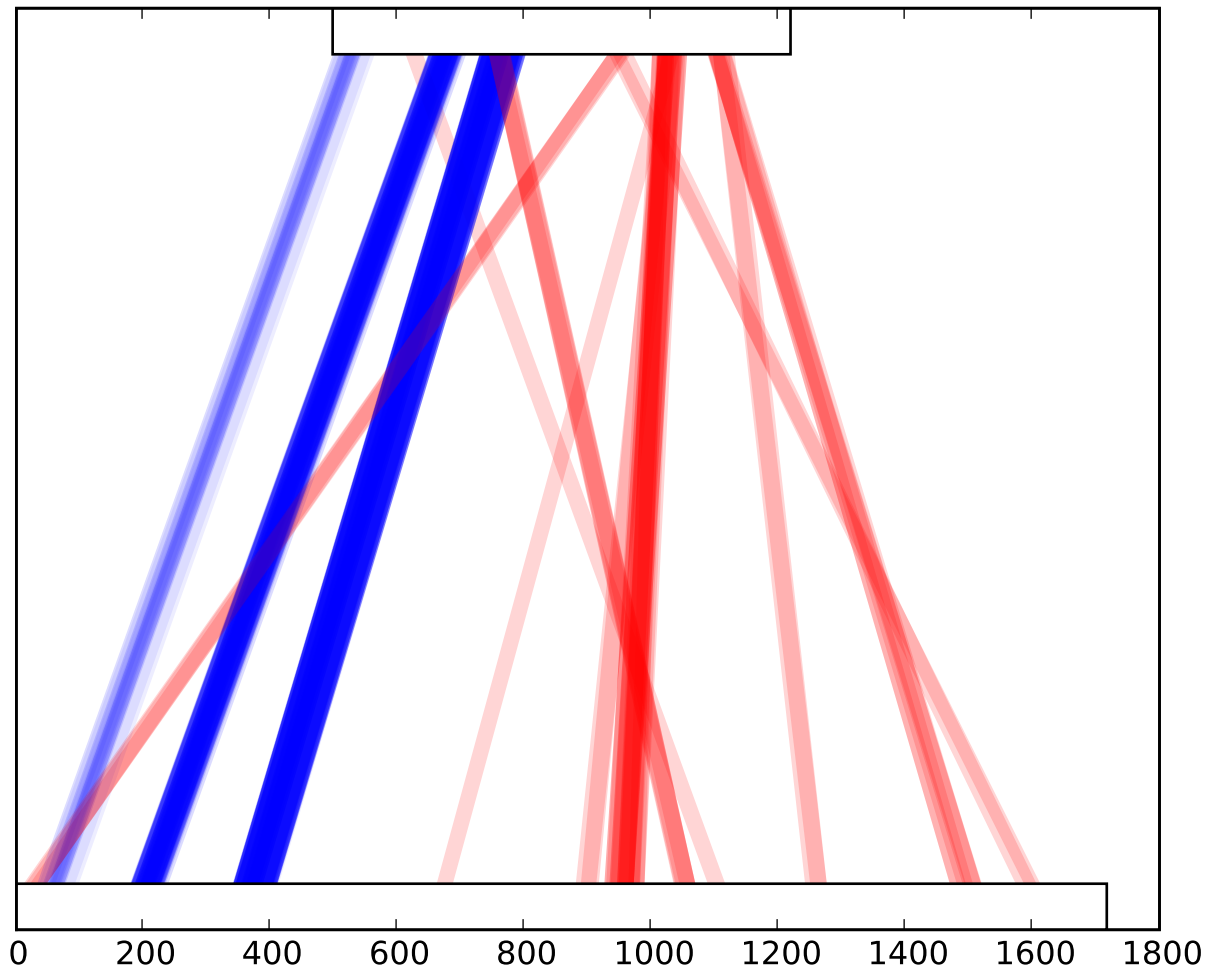

st37\_dmel\_dpse\_20-0.60-0.50.pdf

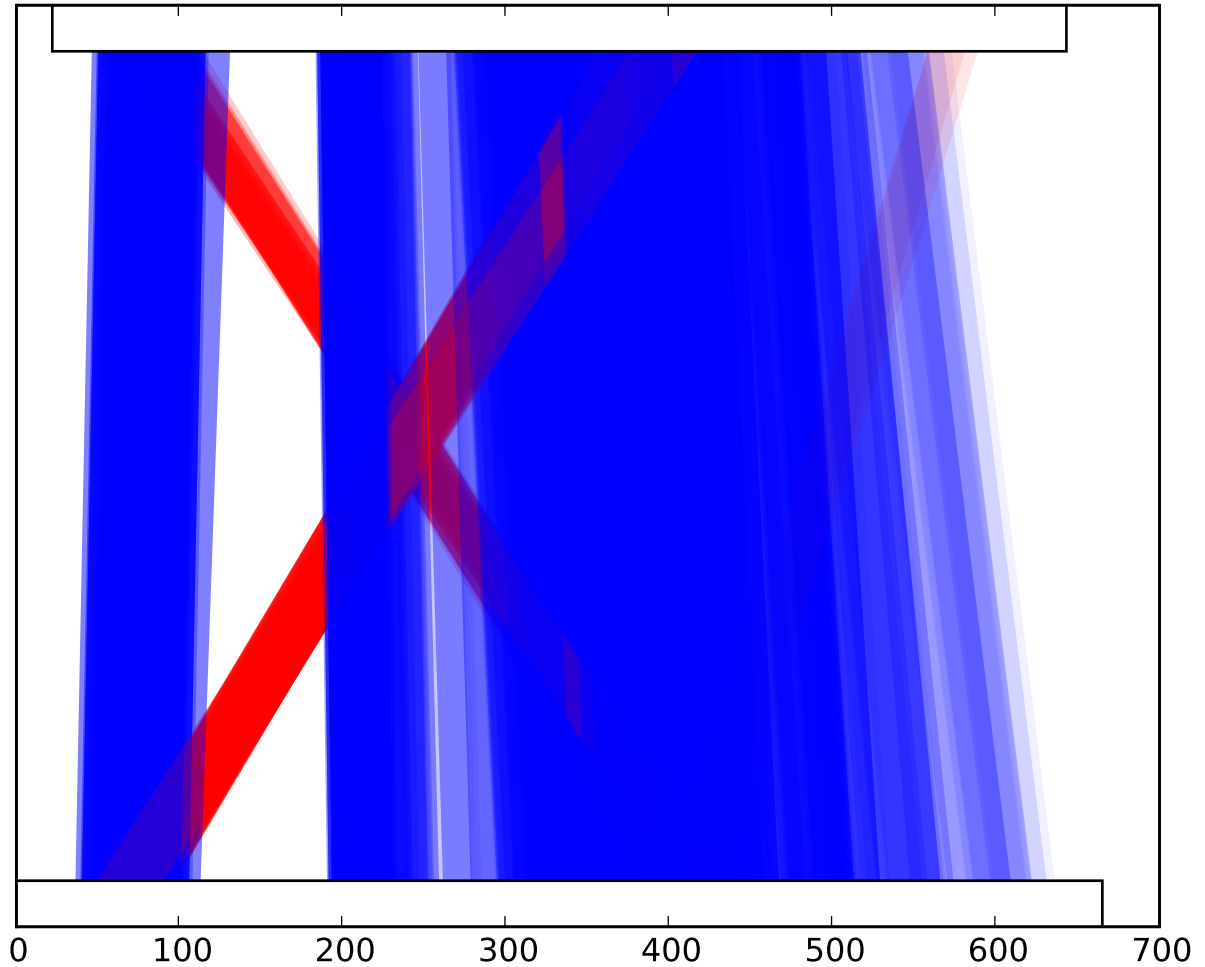

st37\_dmel\_dvir\_20-0.60-0.50.pdf

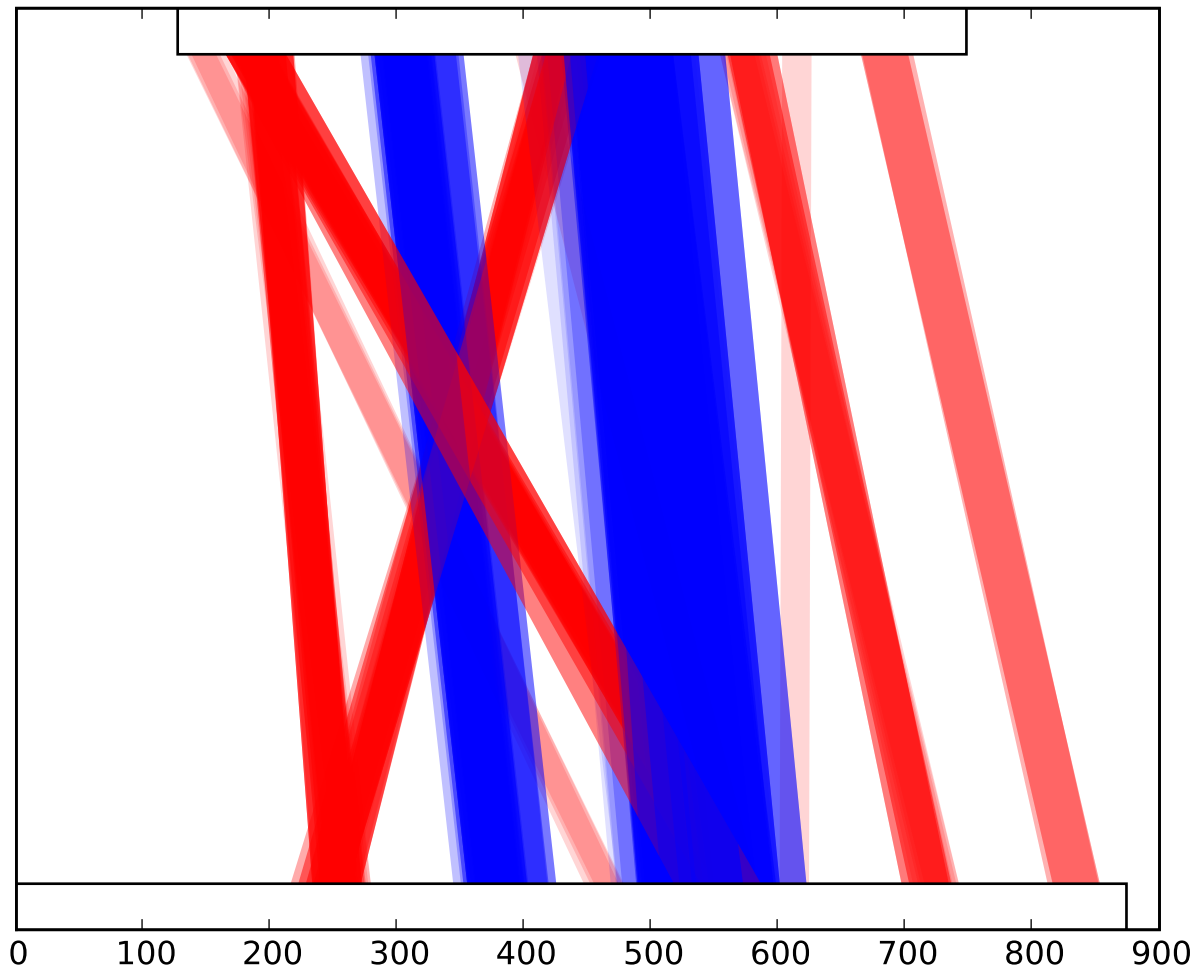

st37\_dmel\_sepsis\_cynipsea\_20-0.60-0.50.pdf

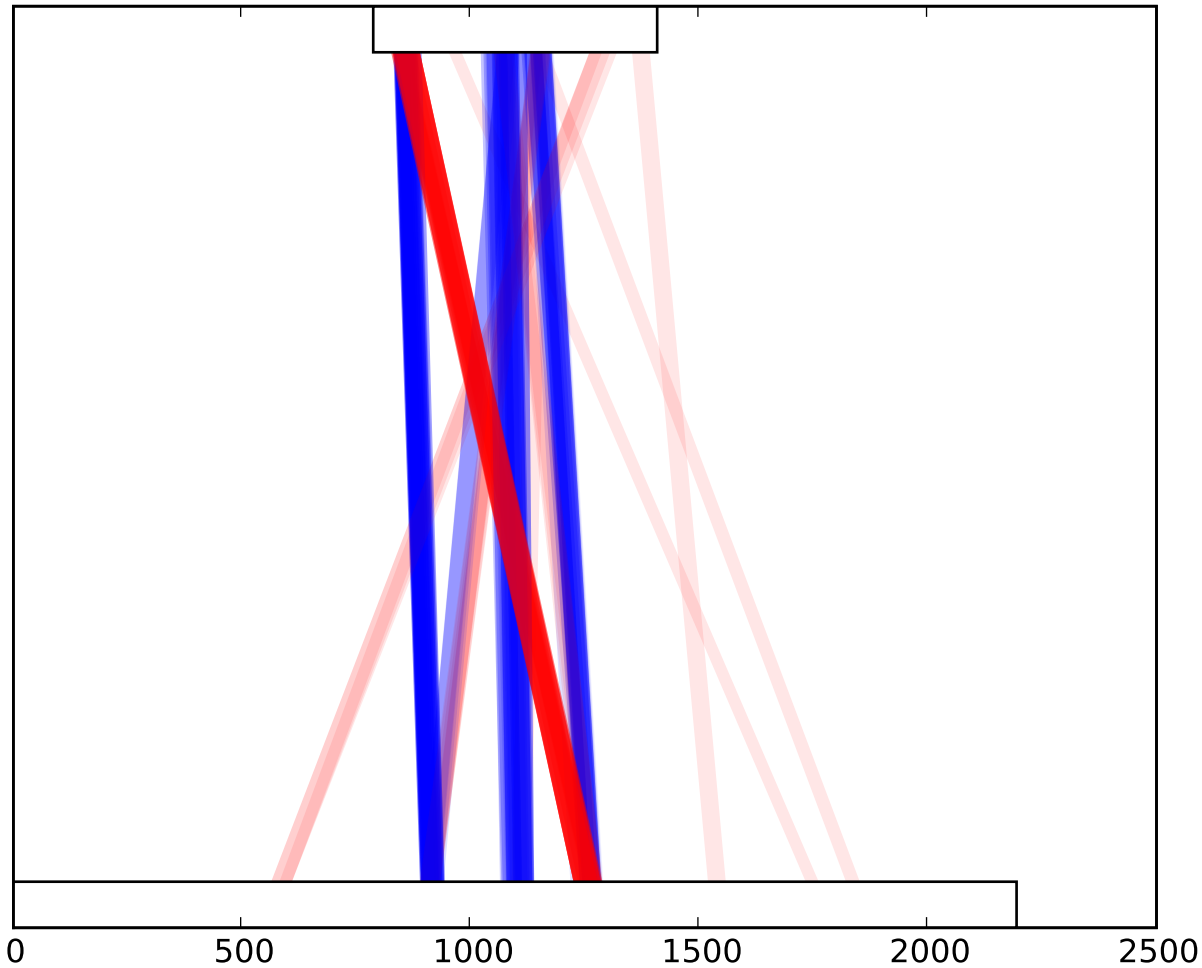

st37\_dmel\_themira\_putris\_20-0.60-0.50.pdf

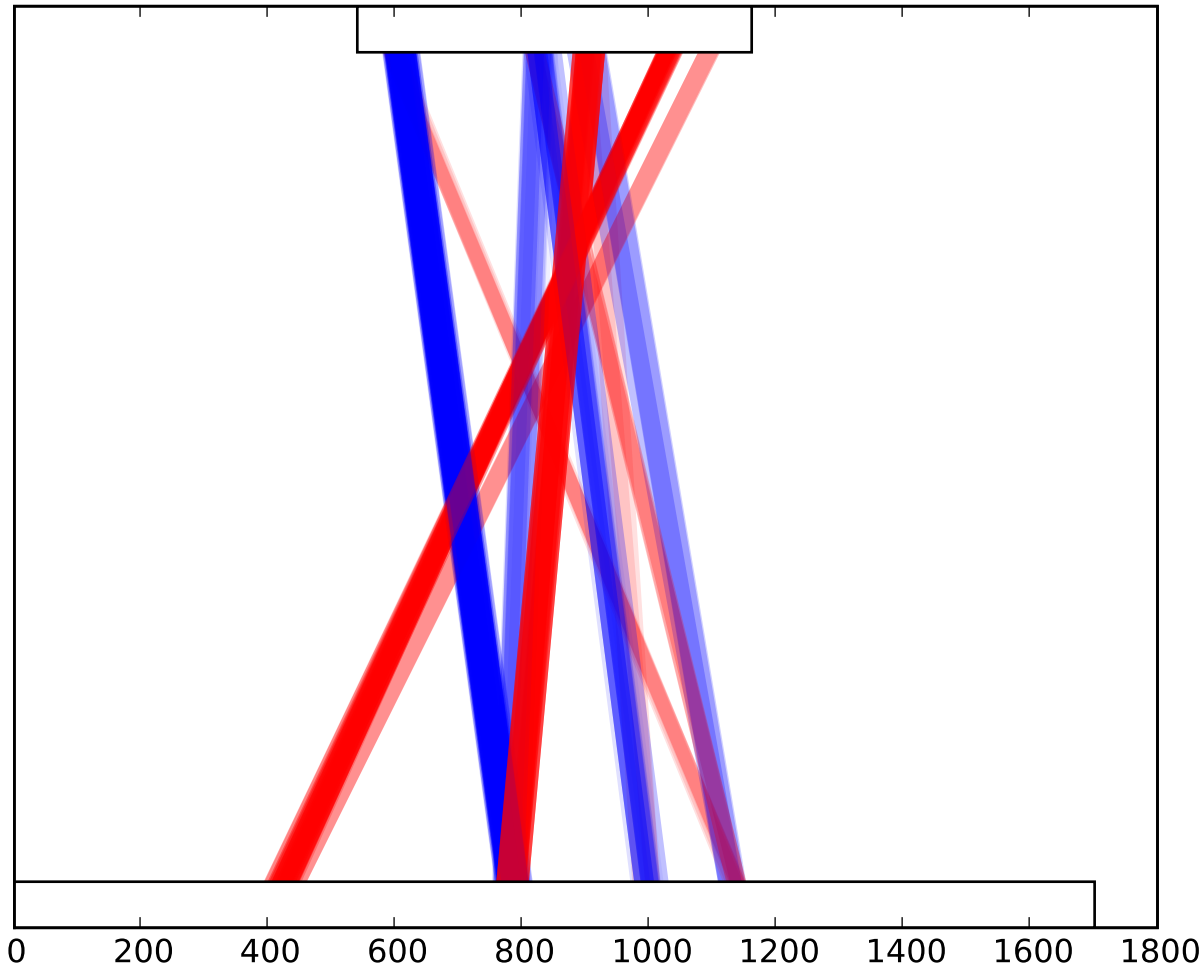



st46\_dmel\_dpse\_20-0.60-0.50.pdf

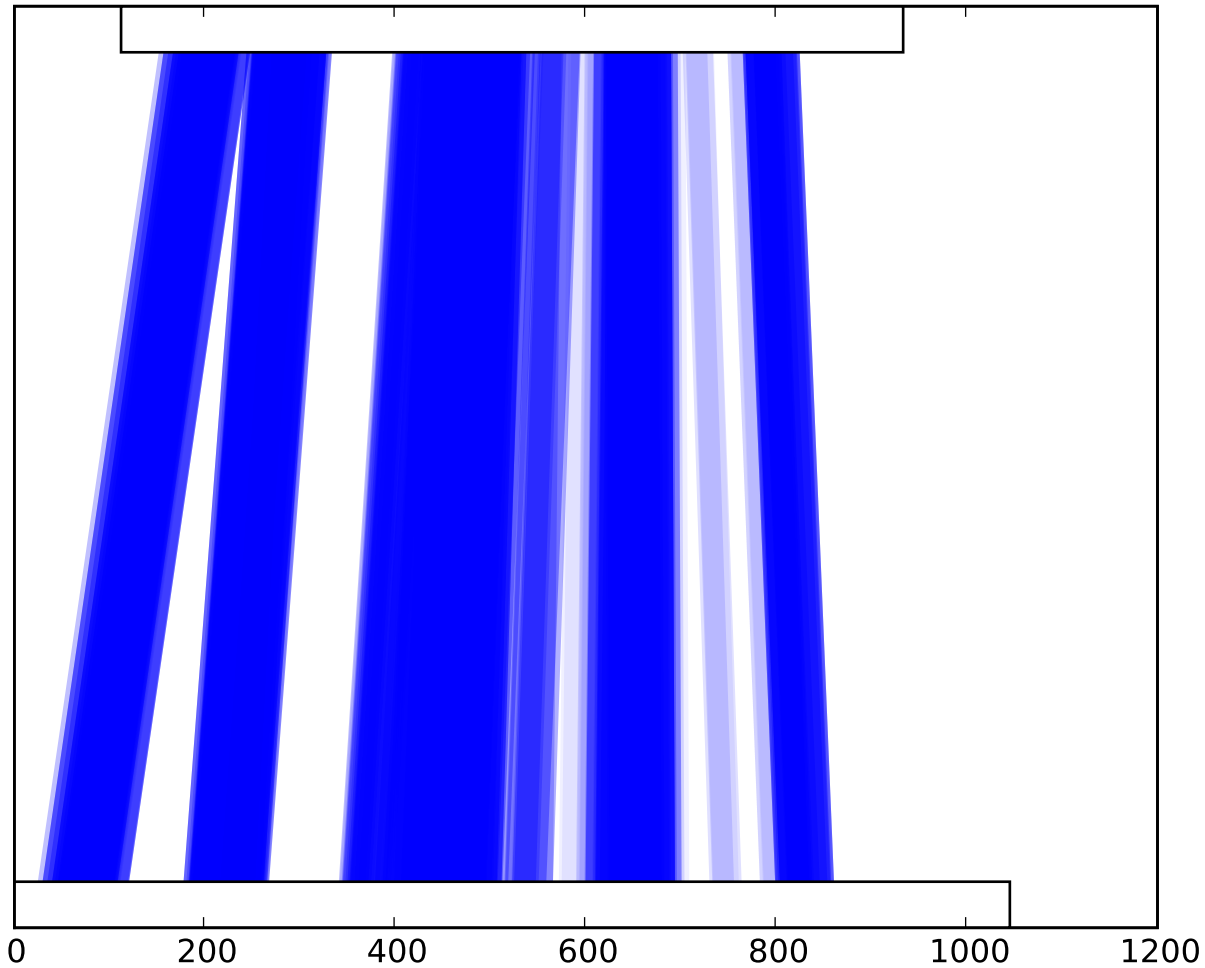

st46\_dmel\_dvir\_20-0.60-0.50.pdf

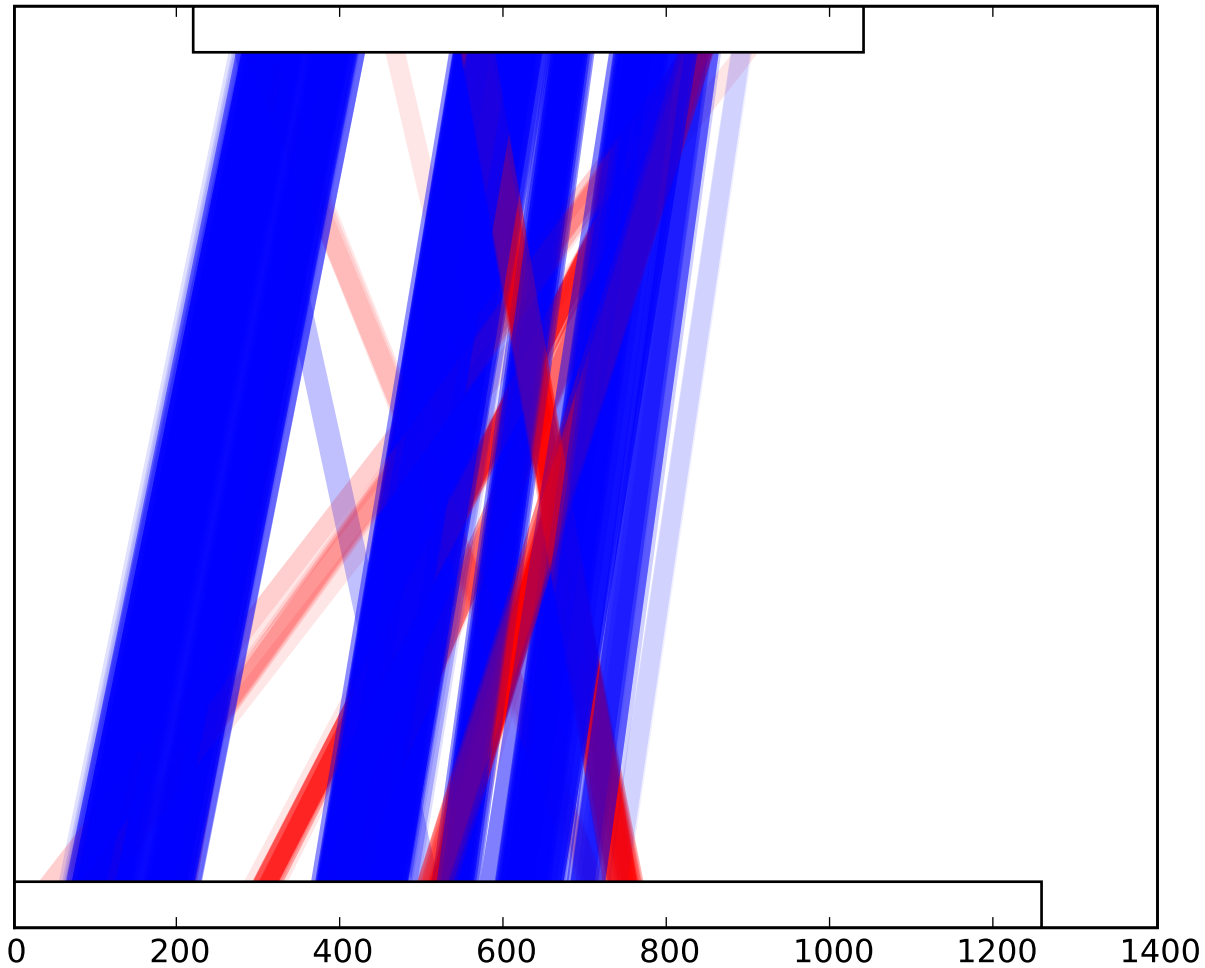

st46\_dmel\_sepsis\_cynipsea\_20-0.60-0.50.pdf

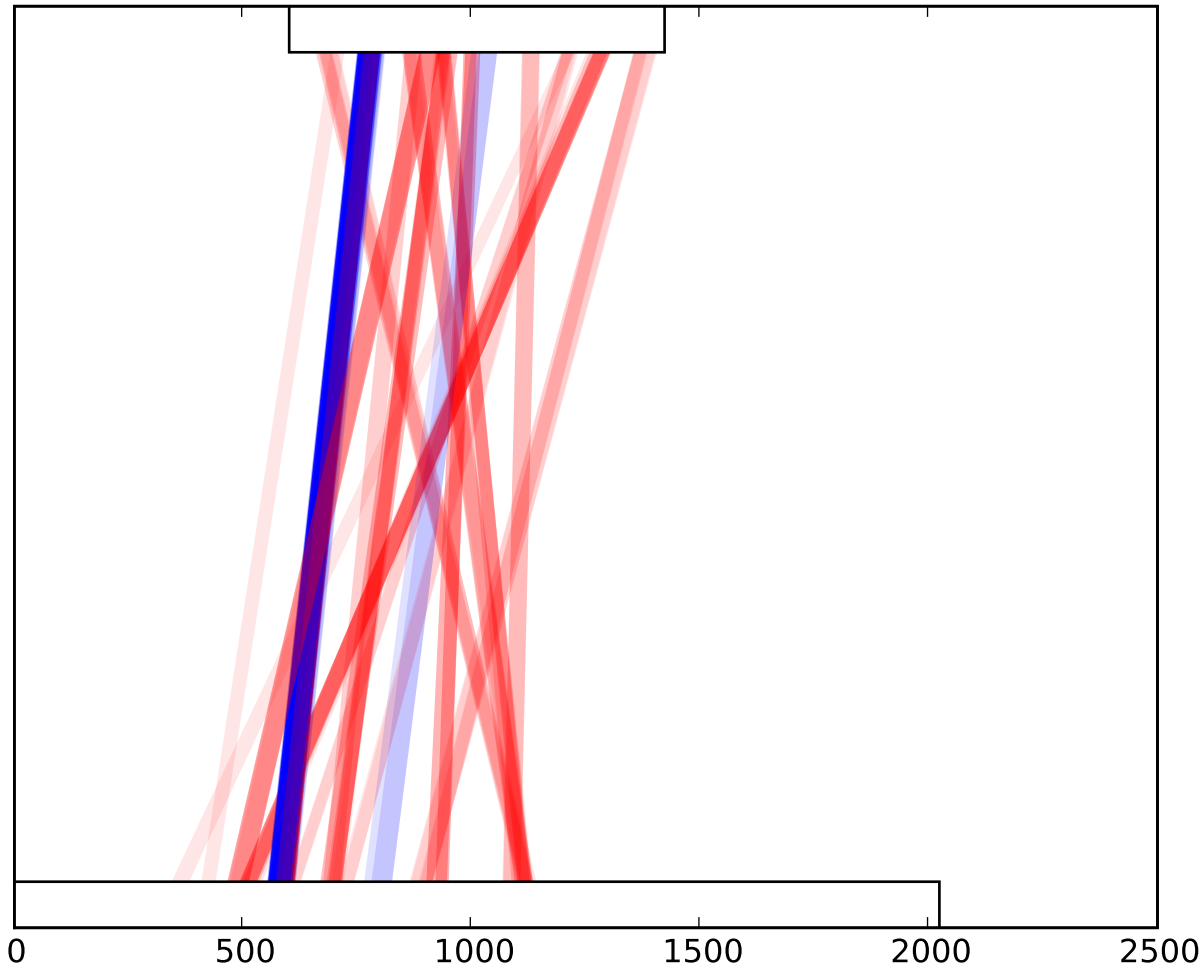

st46\_dmel\_themira\_putris\_20-0.60-0.50.pdf

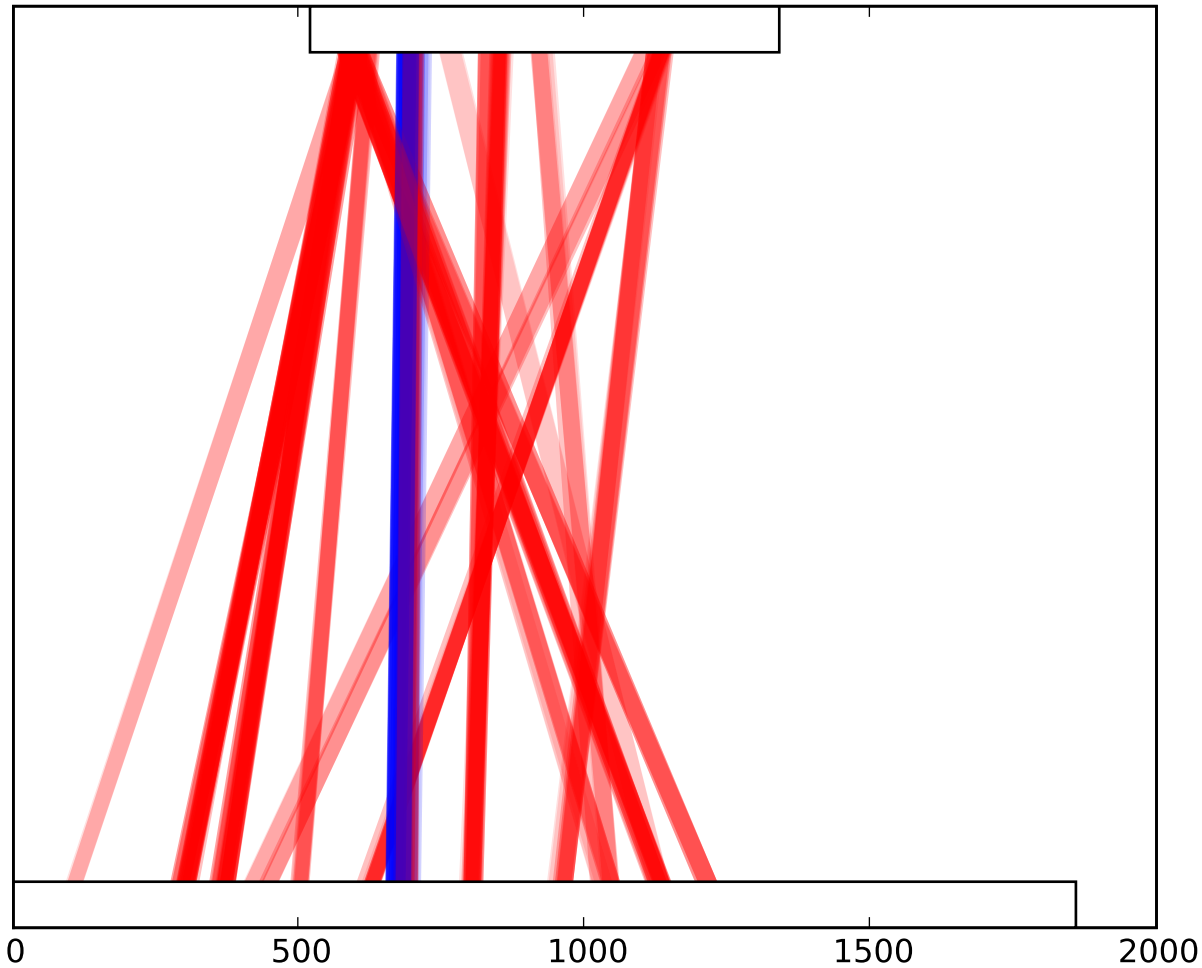

MHE\_dmel\_dpse\_20-0.60-0.50.pdf

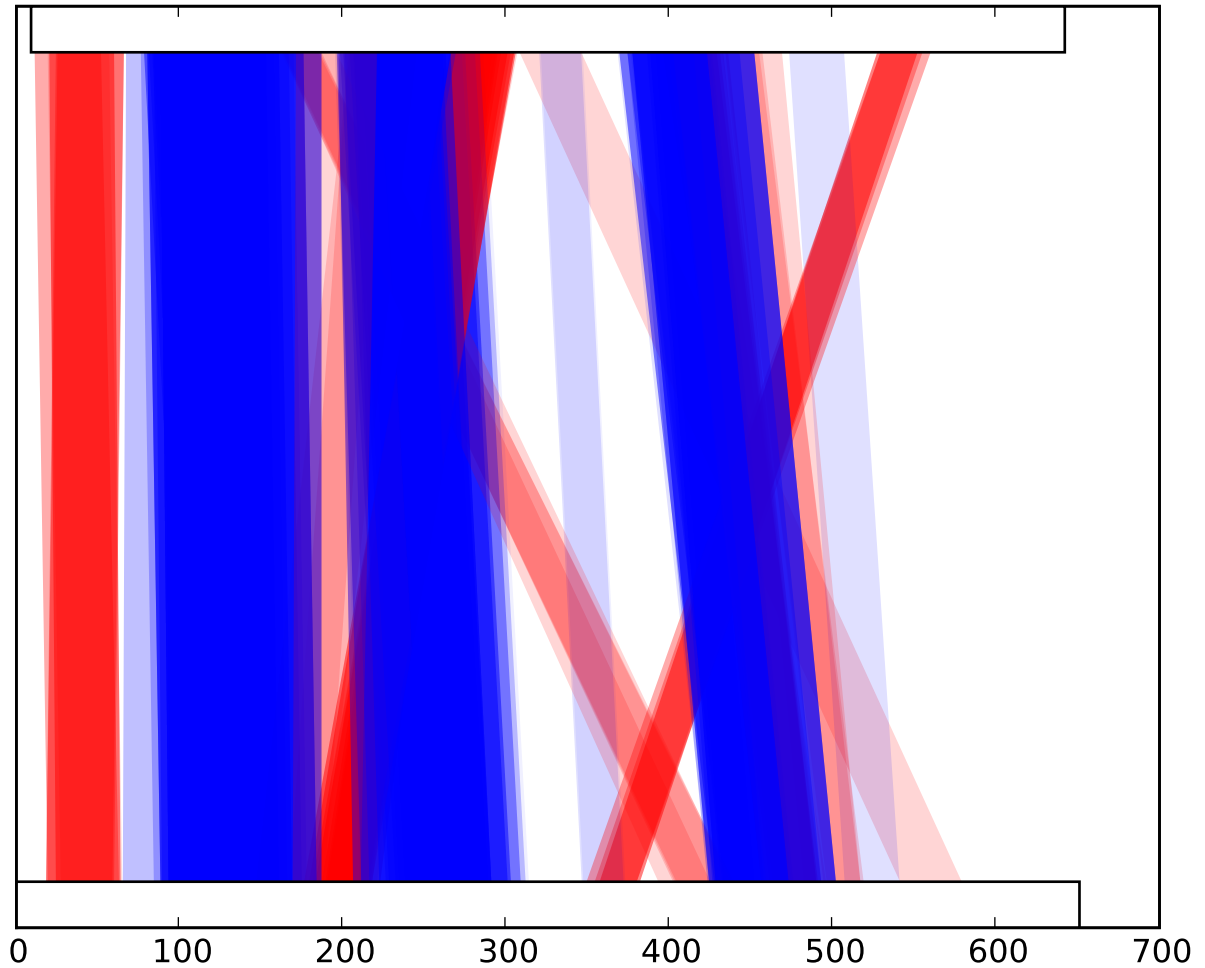

MHE\_dmel\_dvir\_20-0.60-0.50.pdf

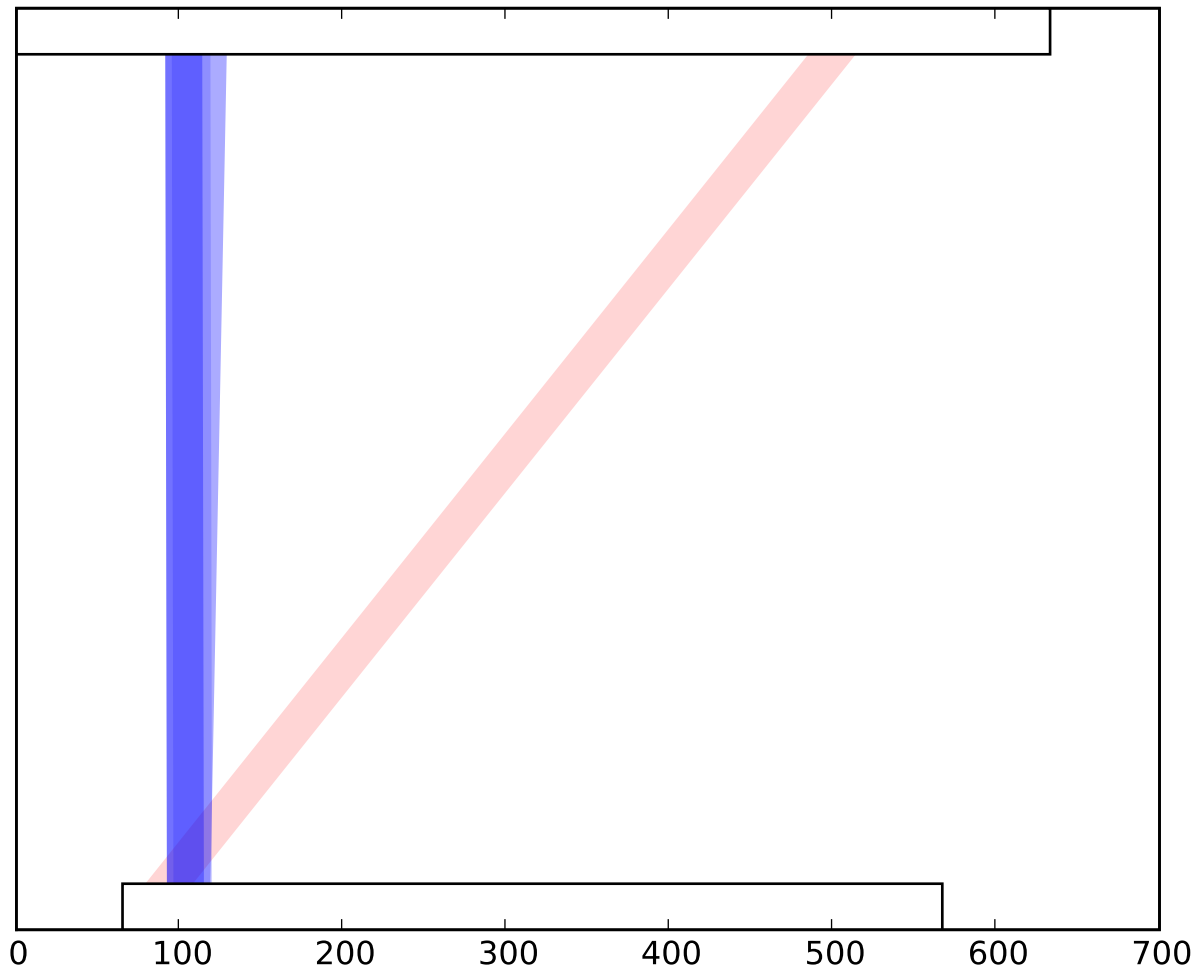

MHE\_dmel\_sepsis\_cynipsea\_20-0.60-0.50.pdf

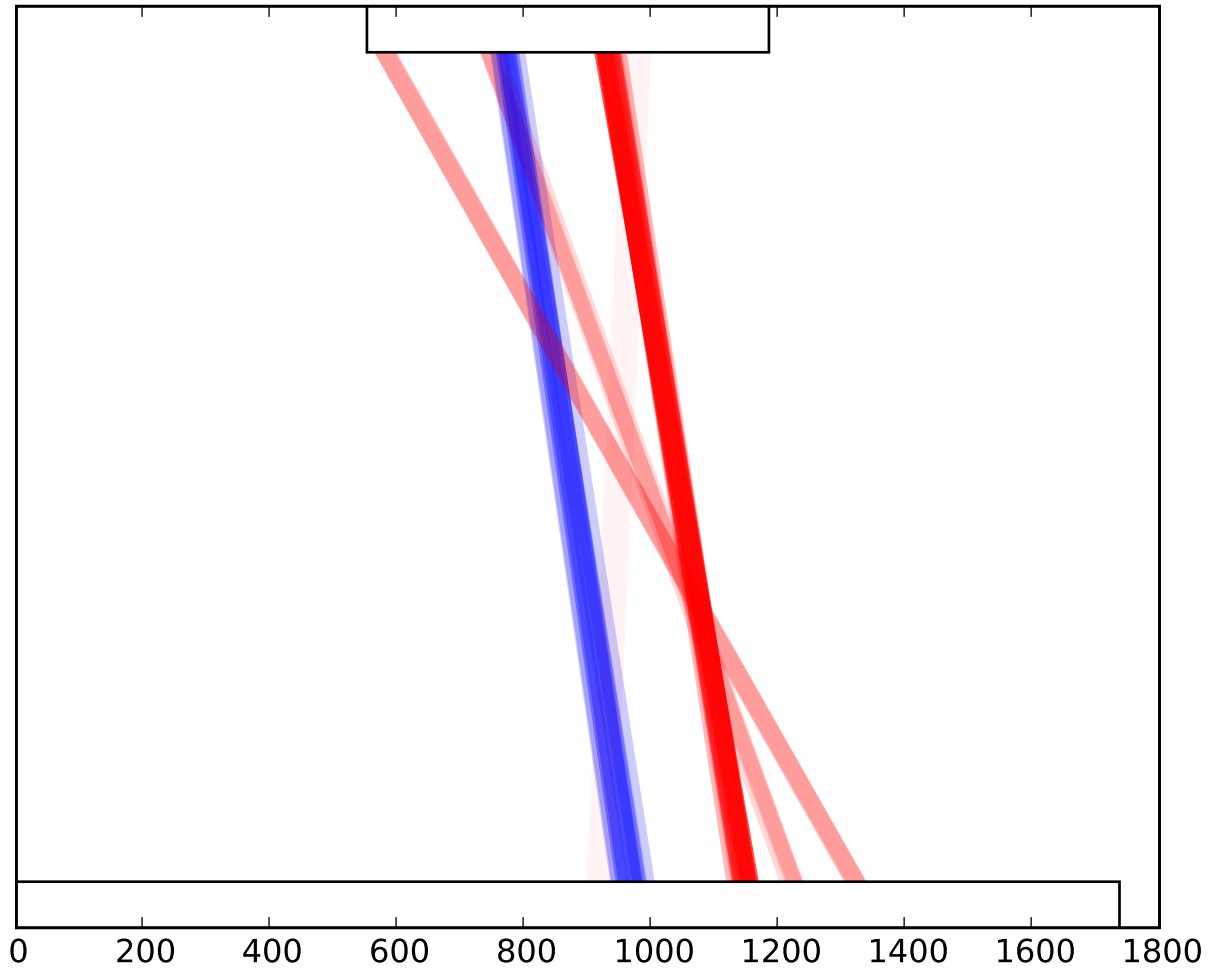

MHE\_dmel\_themira\_putris\_20-0.60-0.50.pdf

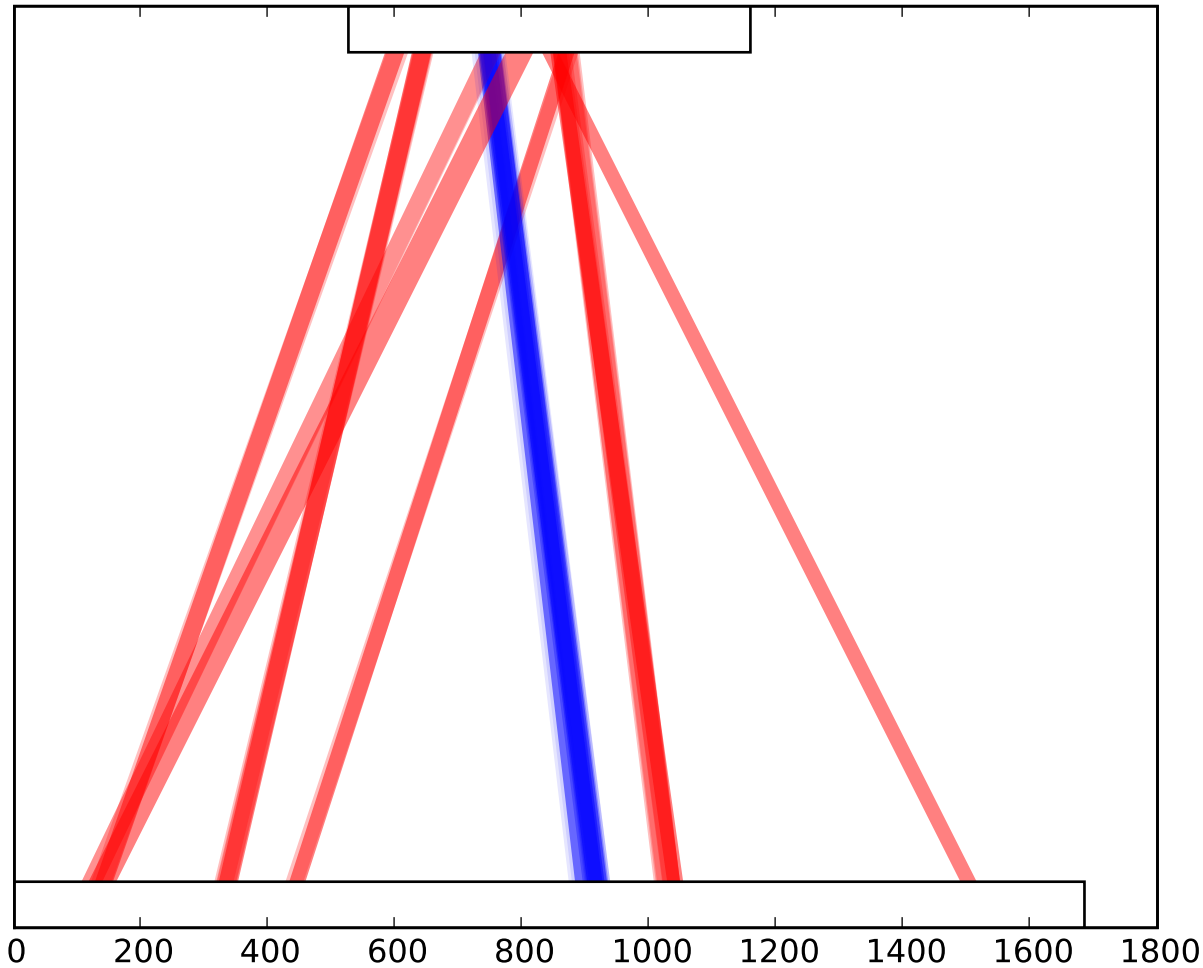



st2\_dmel\_dpse\_20-0.60-0.60.pdf

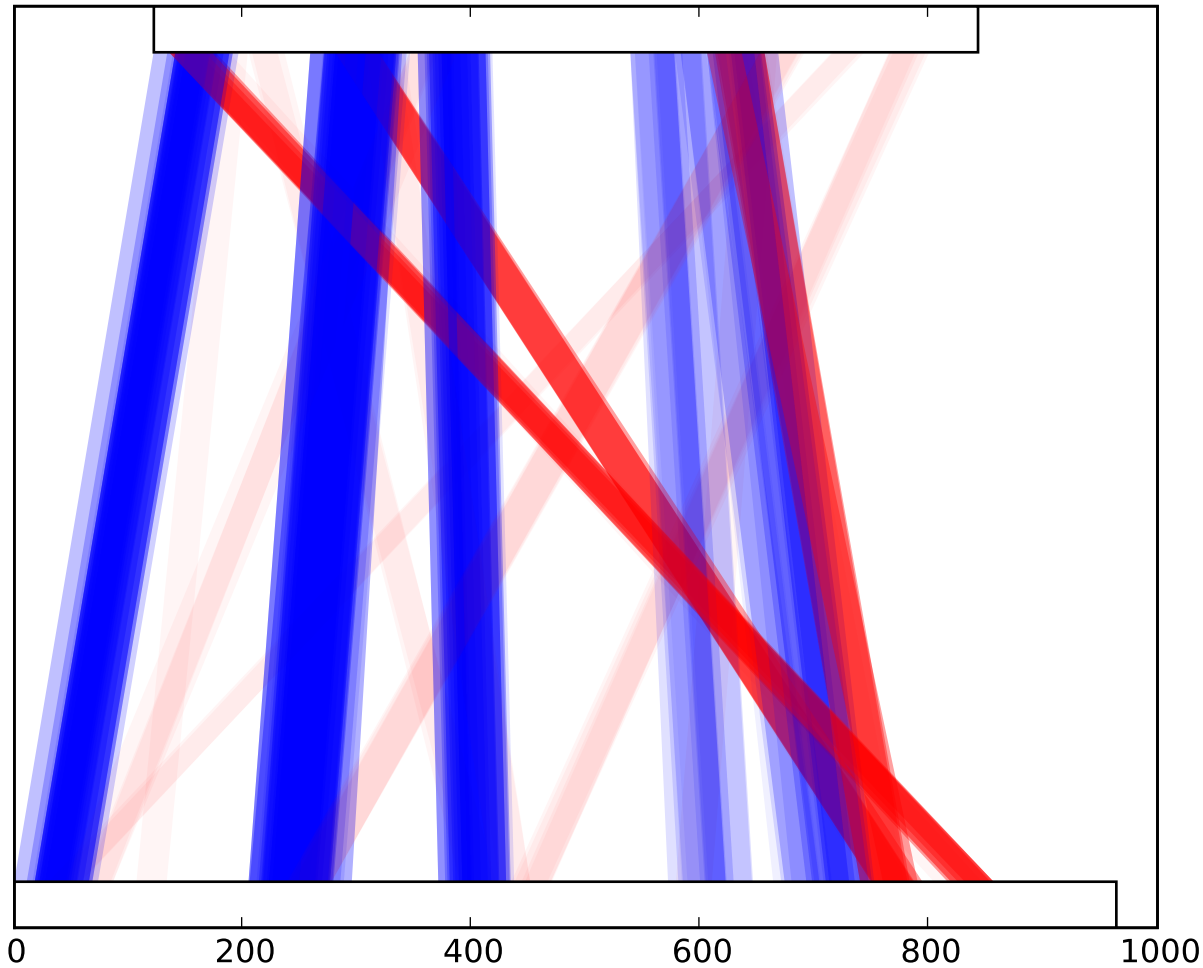

st2\_dmel\_dvir\_20-0.60-0.60.pdf

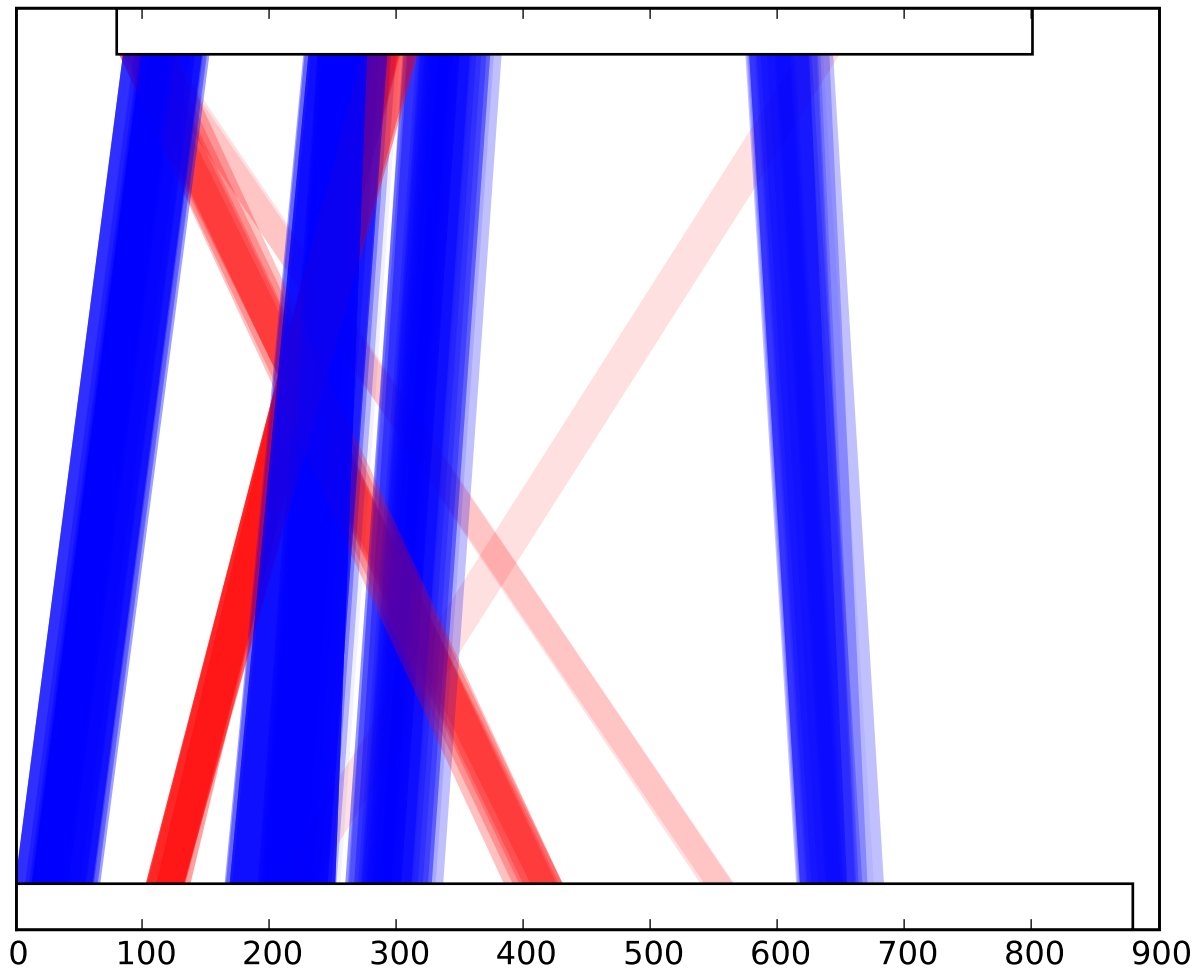

st2\_dmel\_sepsis\_cynipsea\_20-0.60-0.60.pdf

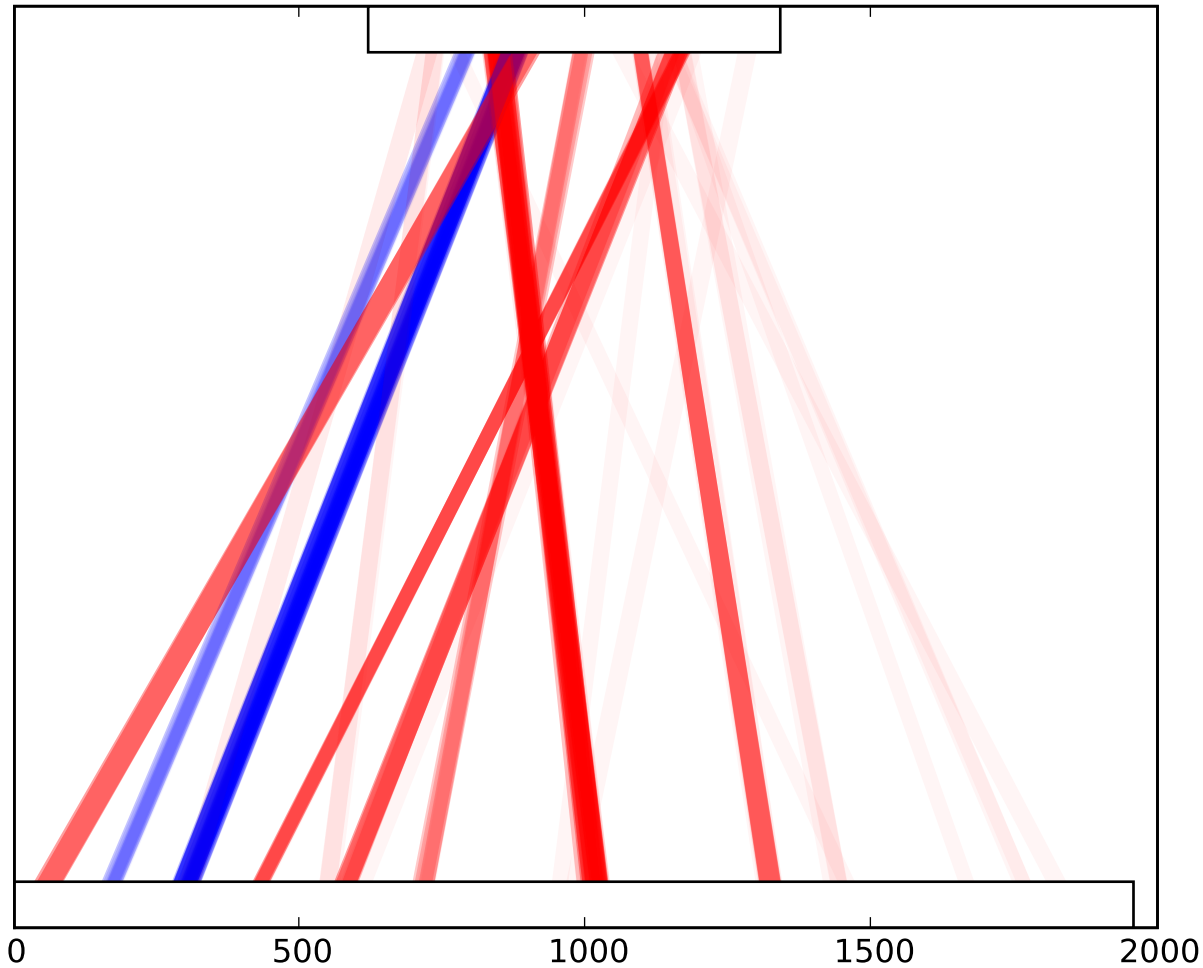

st2\_dmel\_themira\_putris\_20-0.60-0.60.pdf

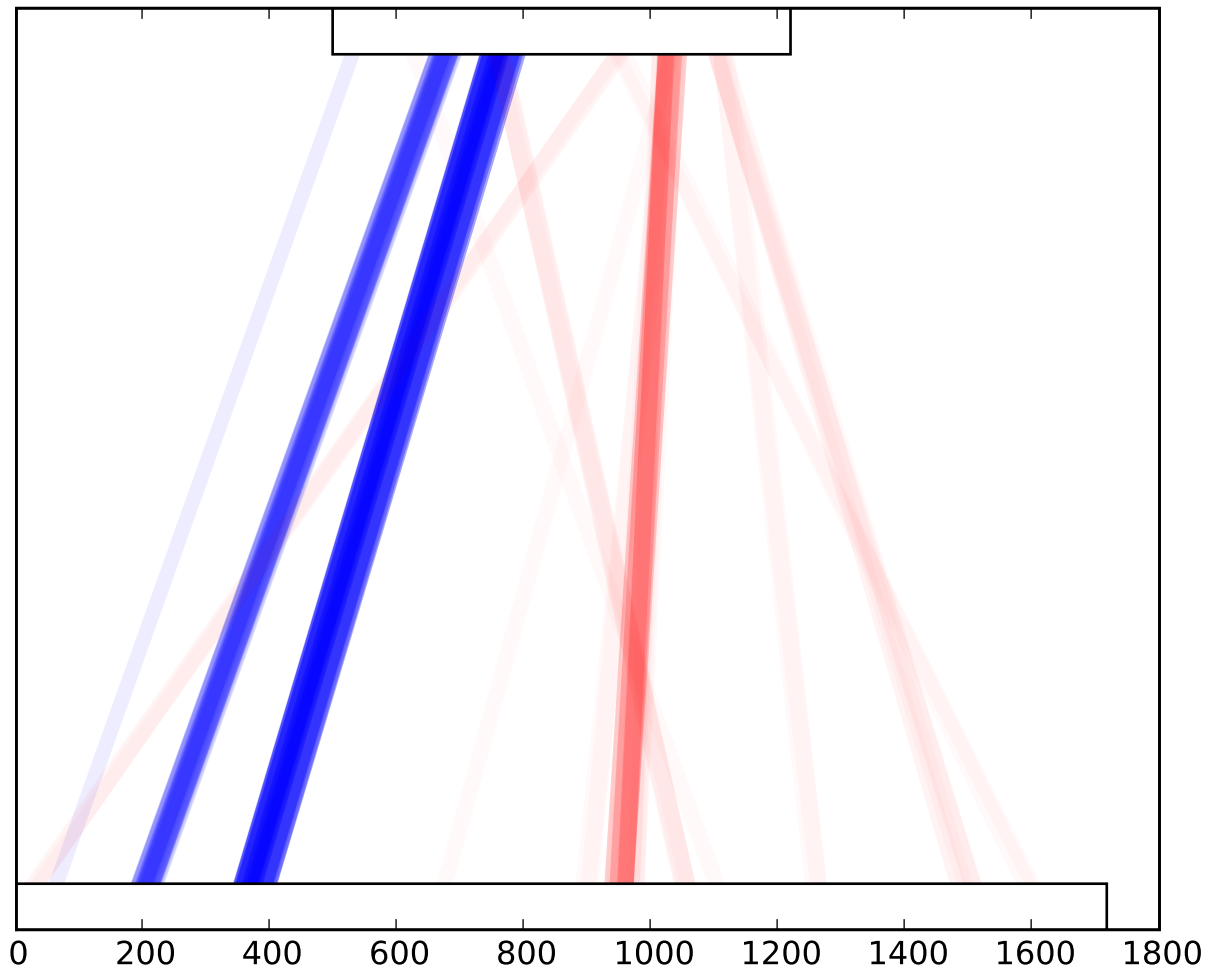

st37\_dmel\_dpse\_20-0.60-0.60.pdf

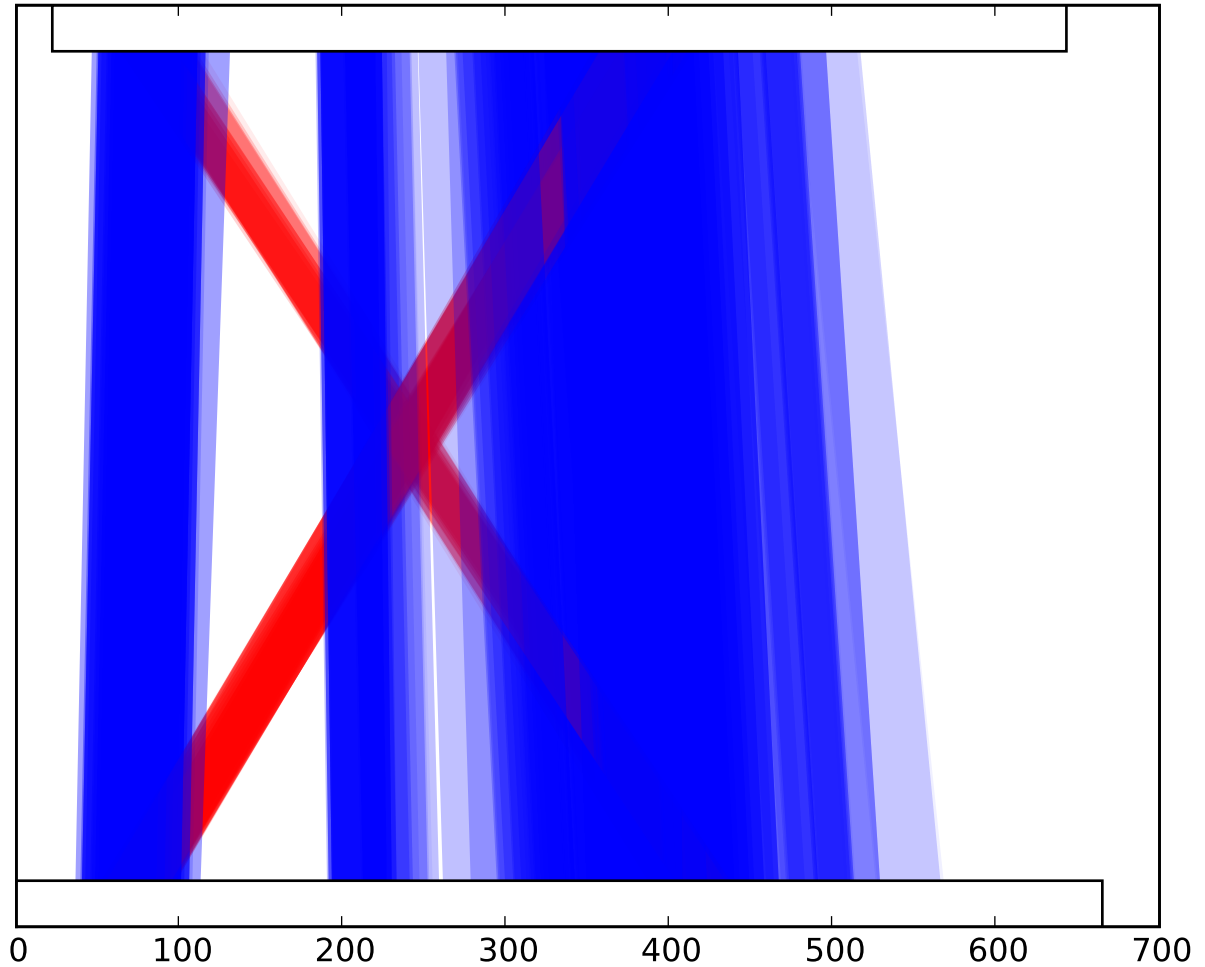

st37\_dmel\_dvir\_20-0.60-0.60.pdf

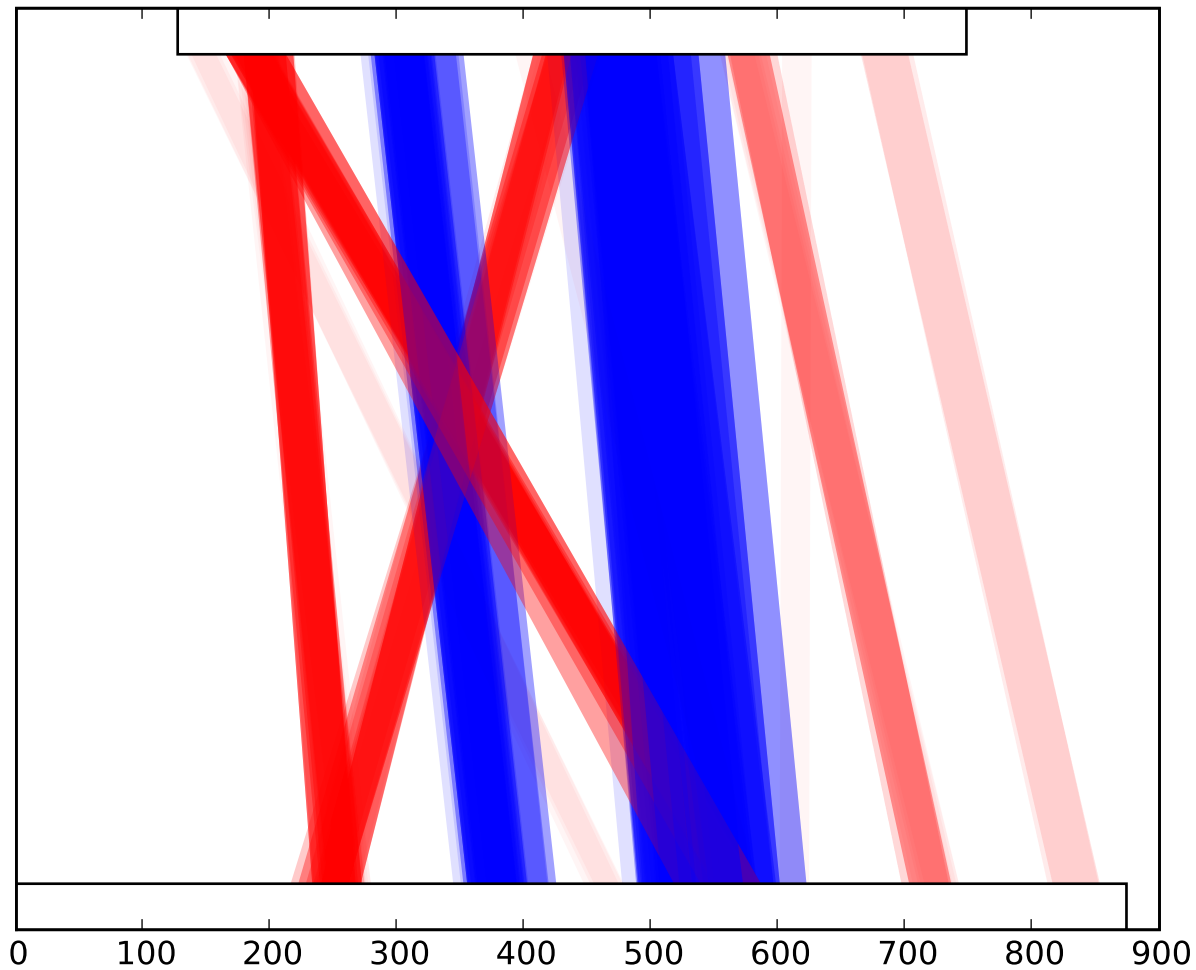

st37\_dmel\_sepsis\_cynipsea\_20-0.60-0.60.pdf

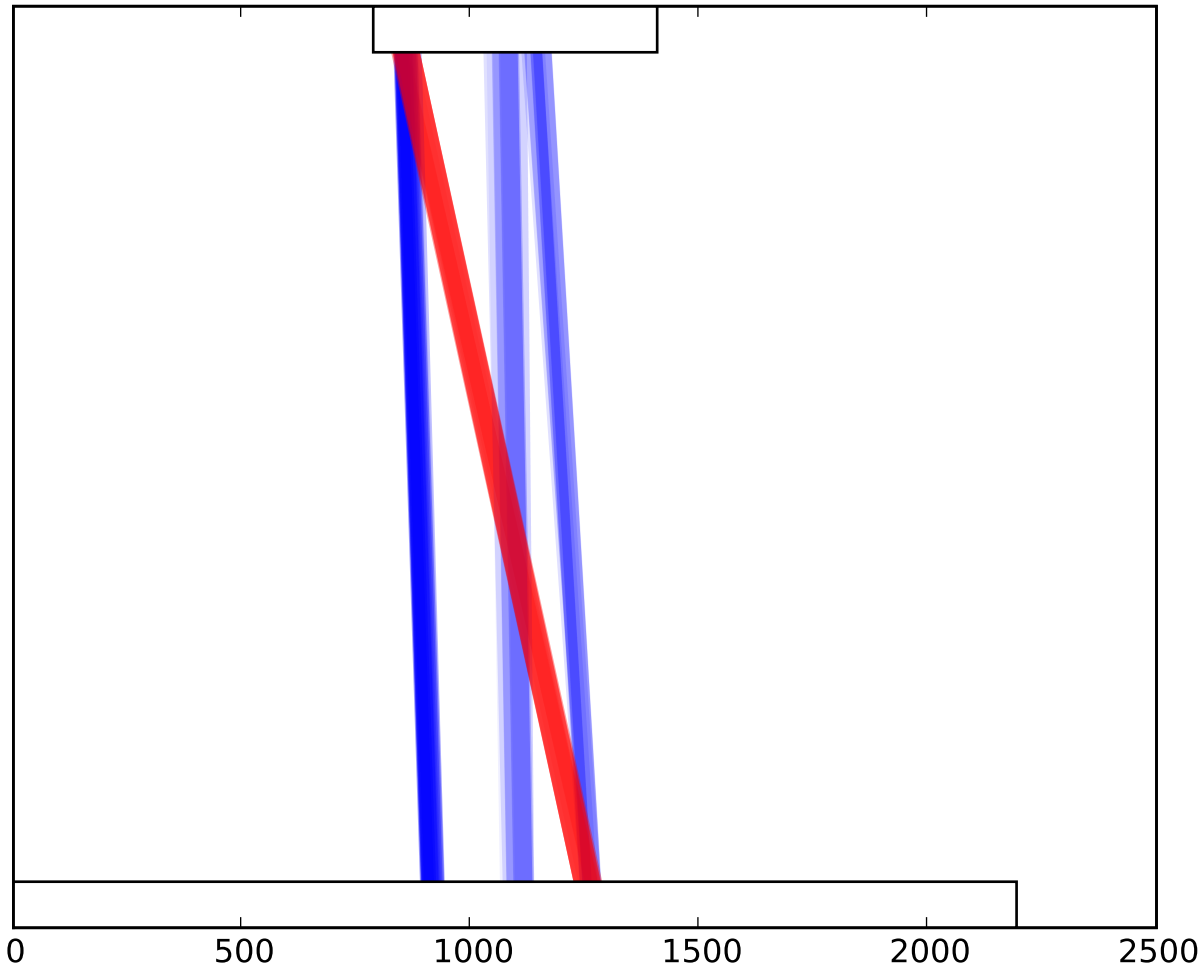

st37\_dmel\_themira\_putris\_20-0.60-0.60.pdf

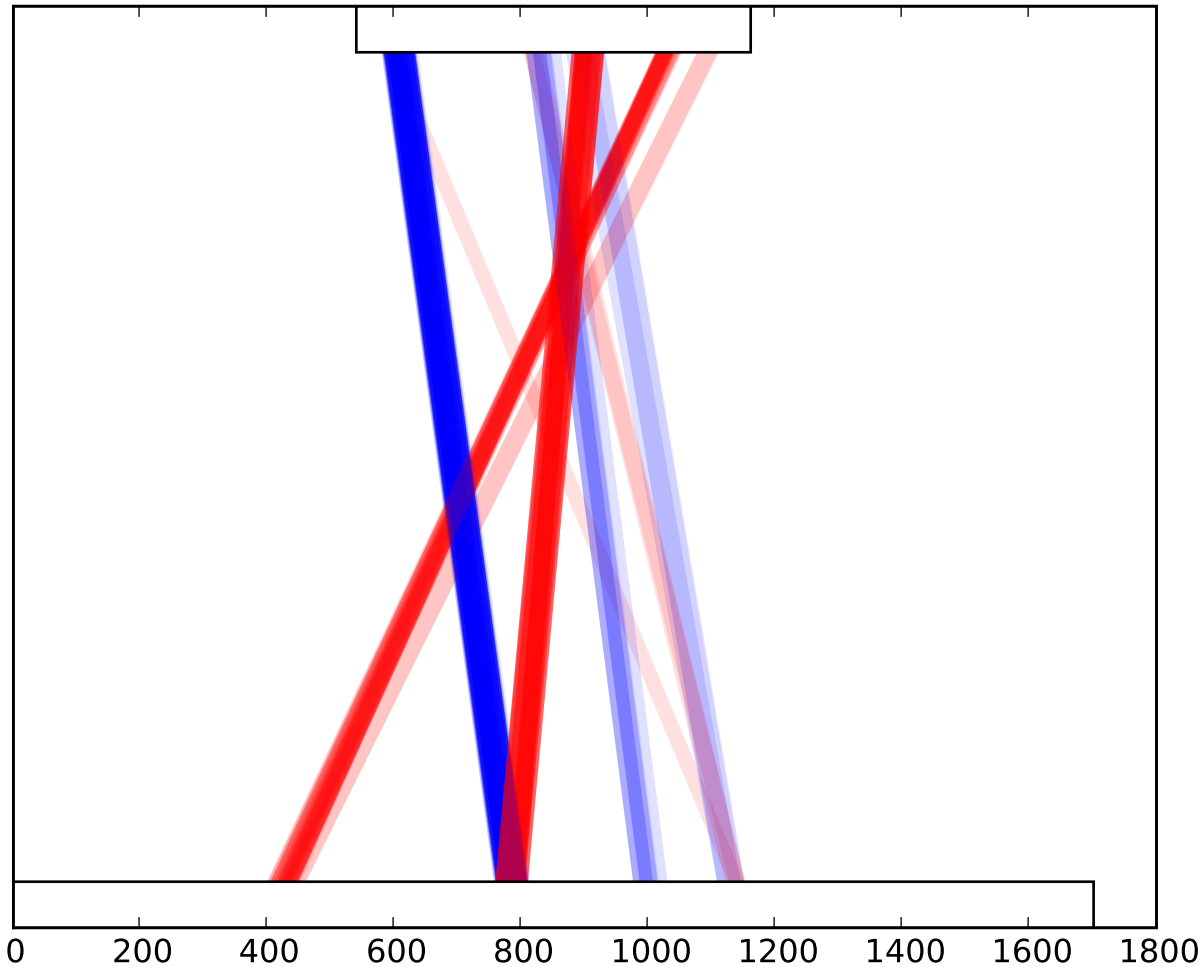



st46\_dmel\_dpse\_20-0.60-0.60.pdf

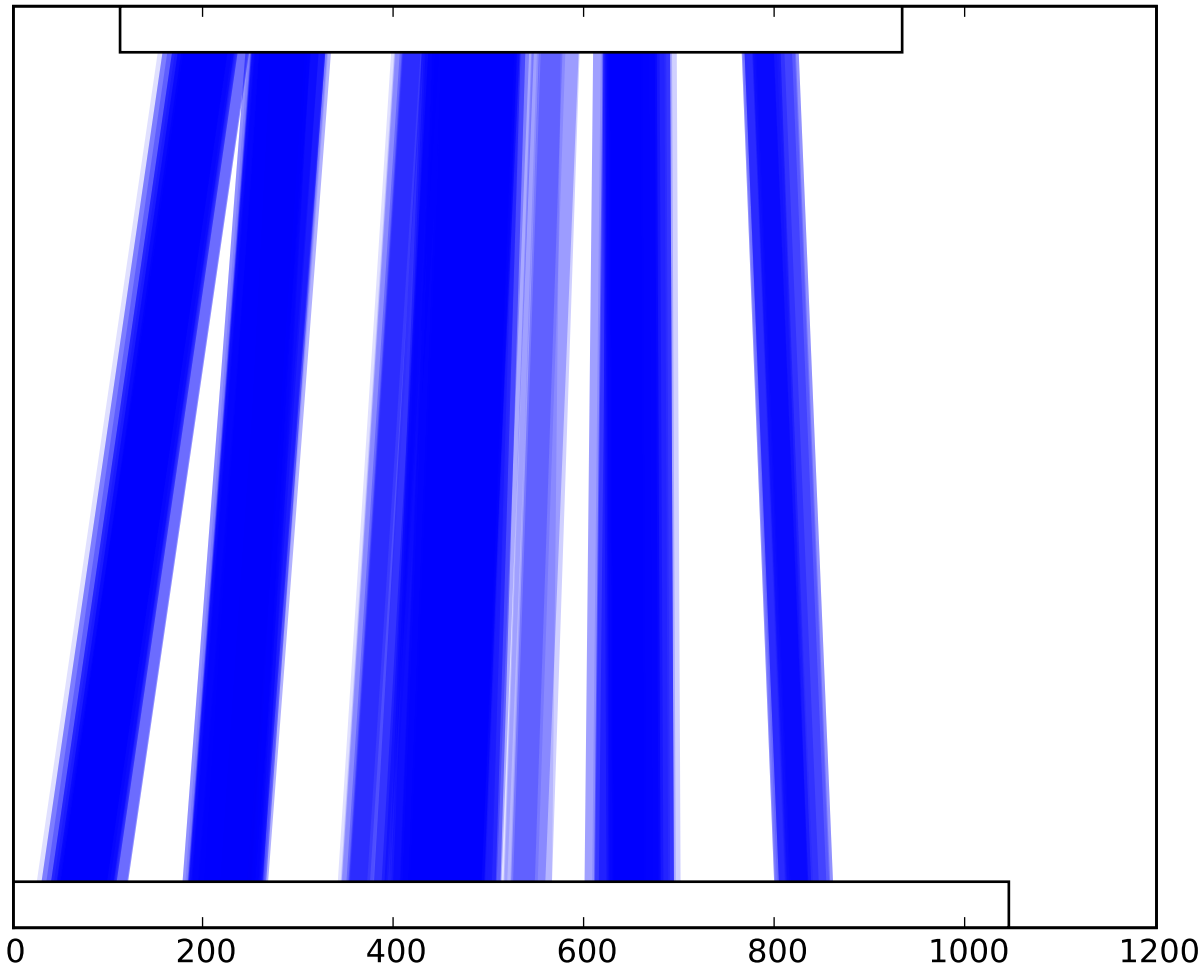

st46\_dmel\_dvir\_20-0.60-0.60.pdf

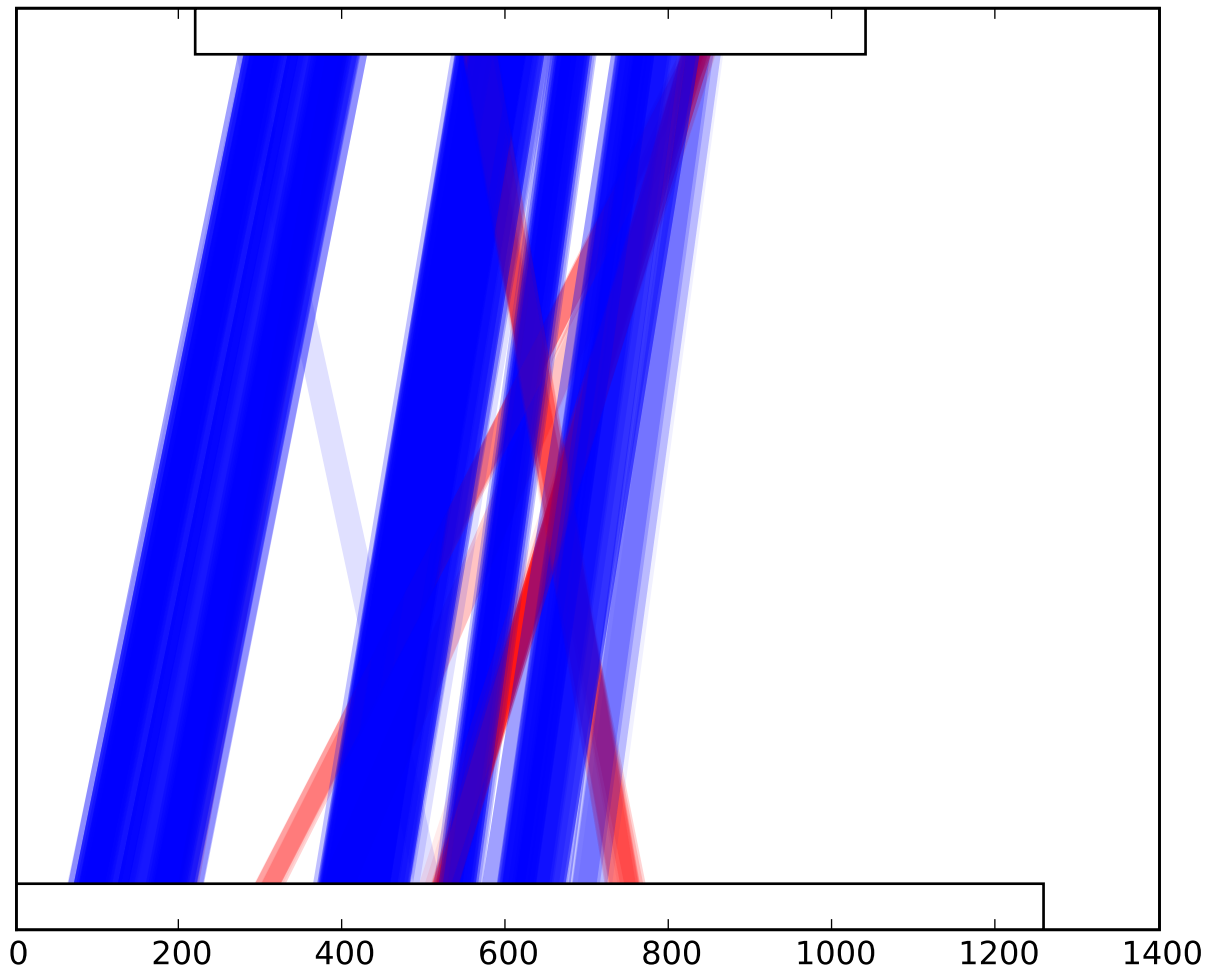

st46\_dmel\_sepsis\_cynipsea\_20-0.60-0.60.pdf

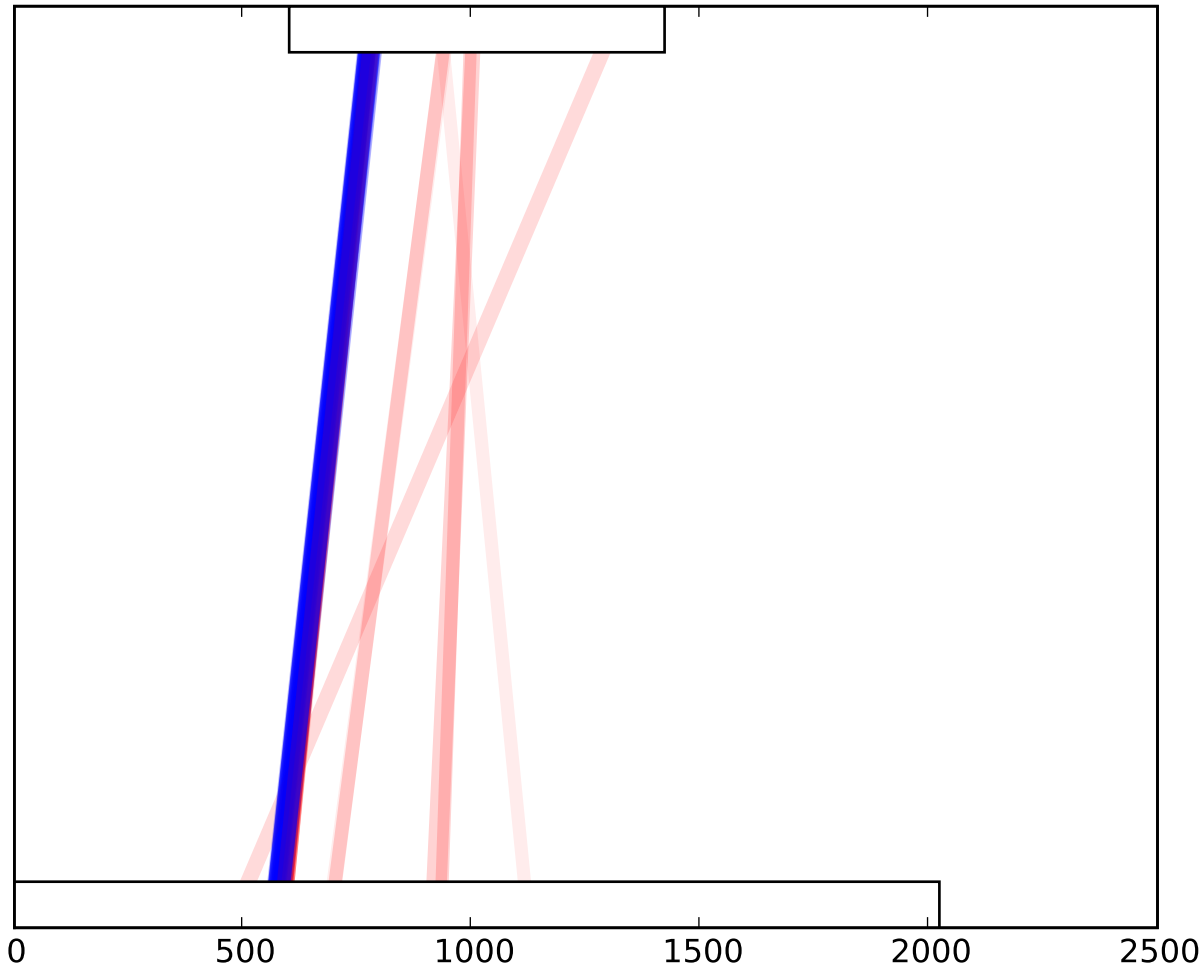

st46\_dmel\_themira\_putris\_20-0.60-0.60.pdf

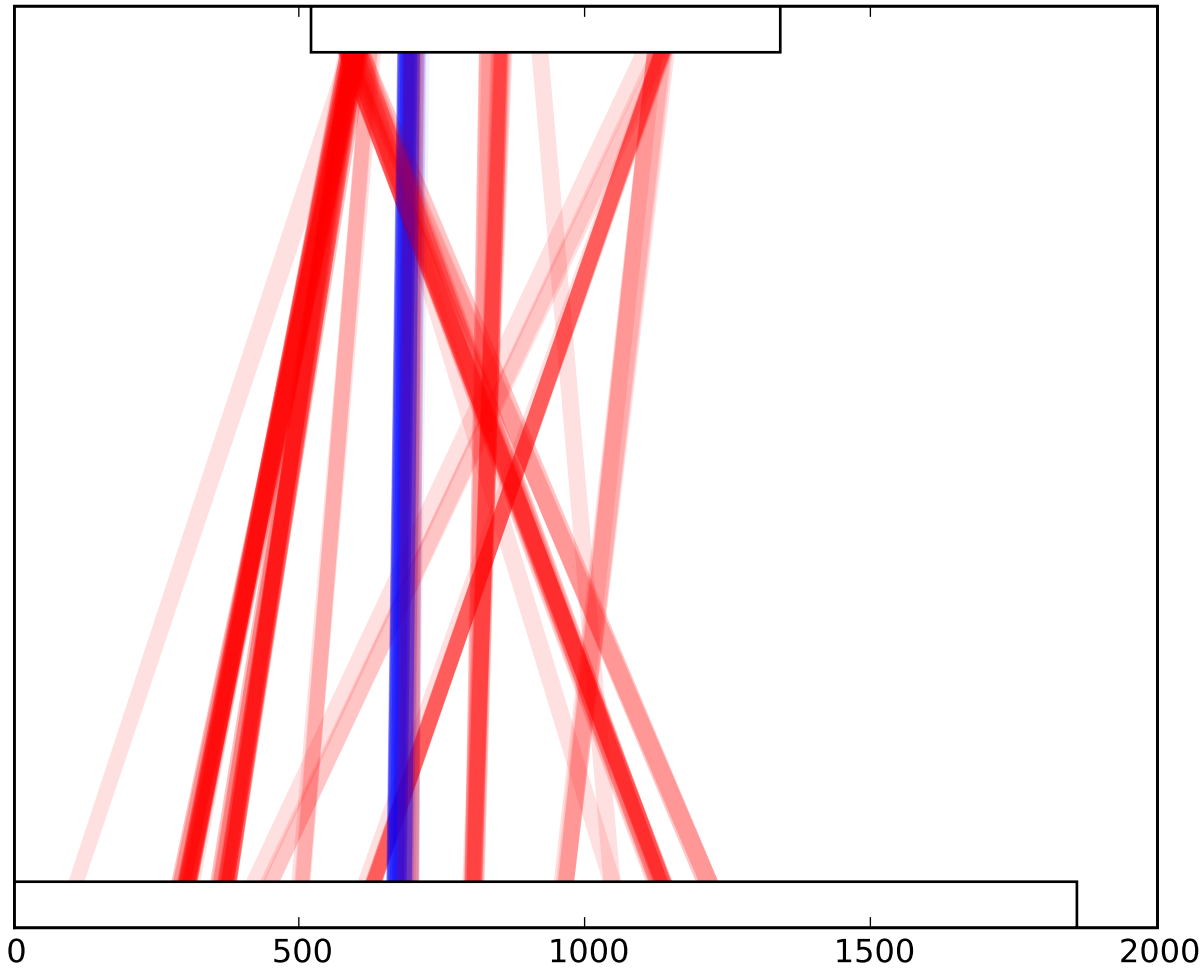

MHE\_dmel\_dpse\_20-0.60-0.60.pdf

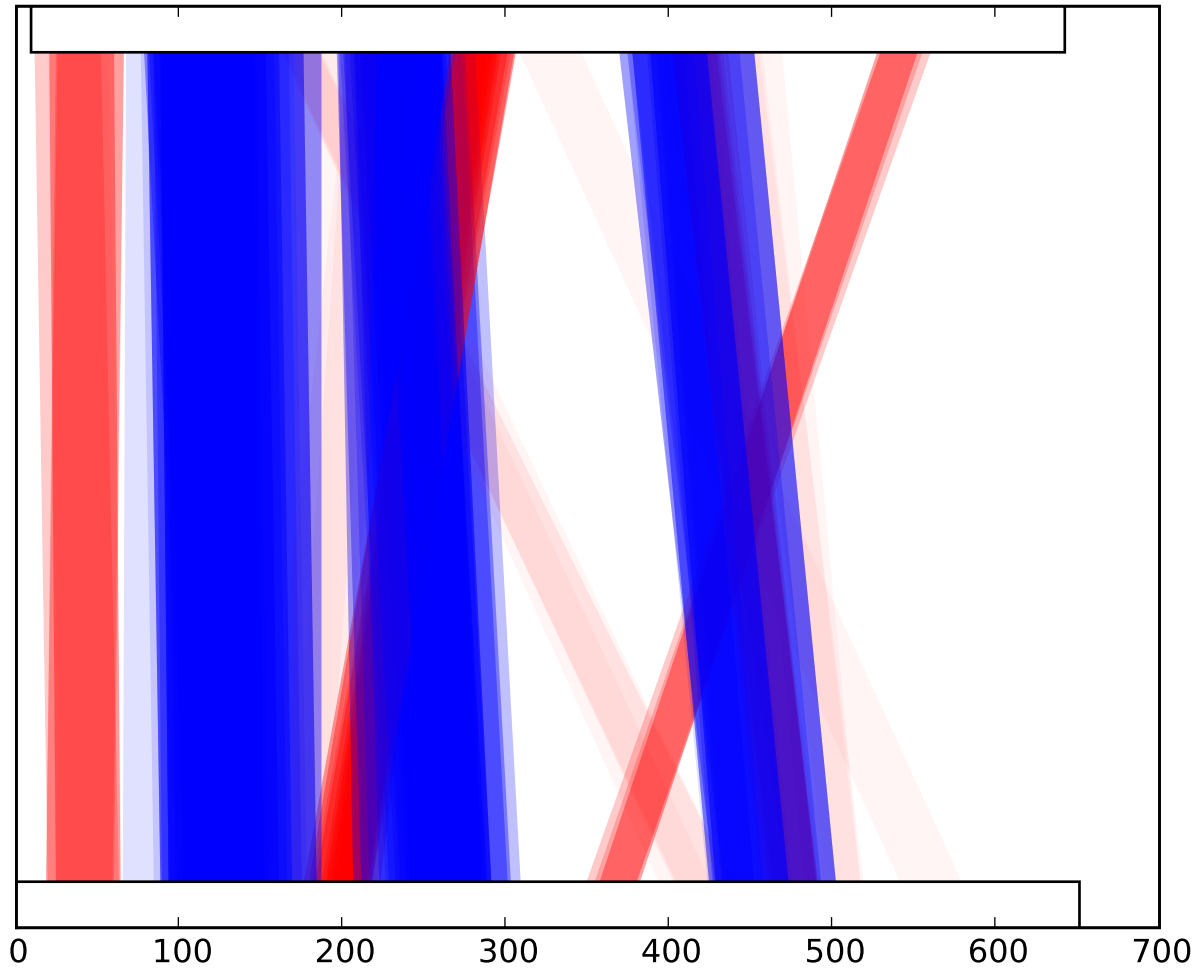

MHE\_dmel\_dvir\_20-0.60-0.60.pdf



MHE\_dmel\_sepsis\_cynipsea\_20-0.60-0.60.pdf

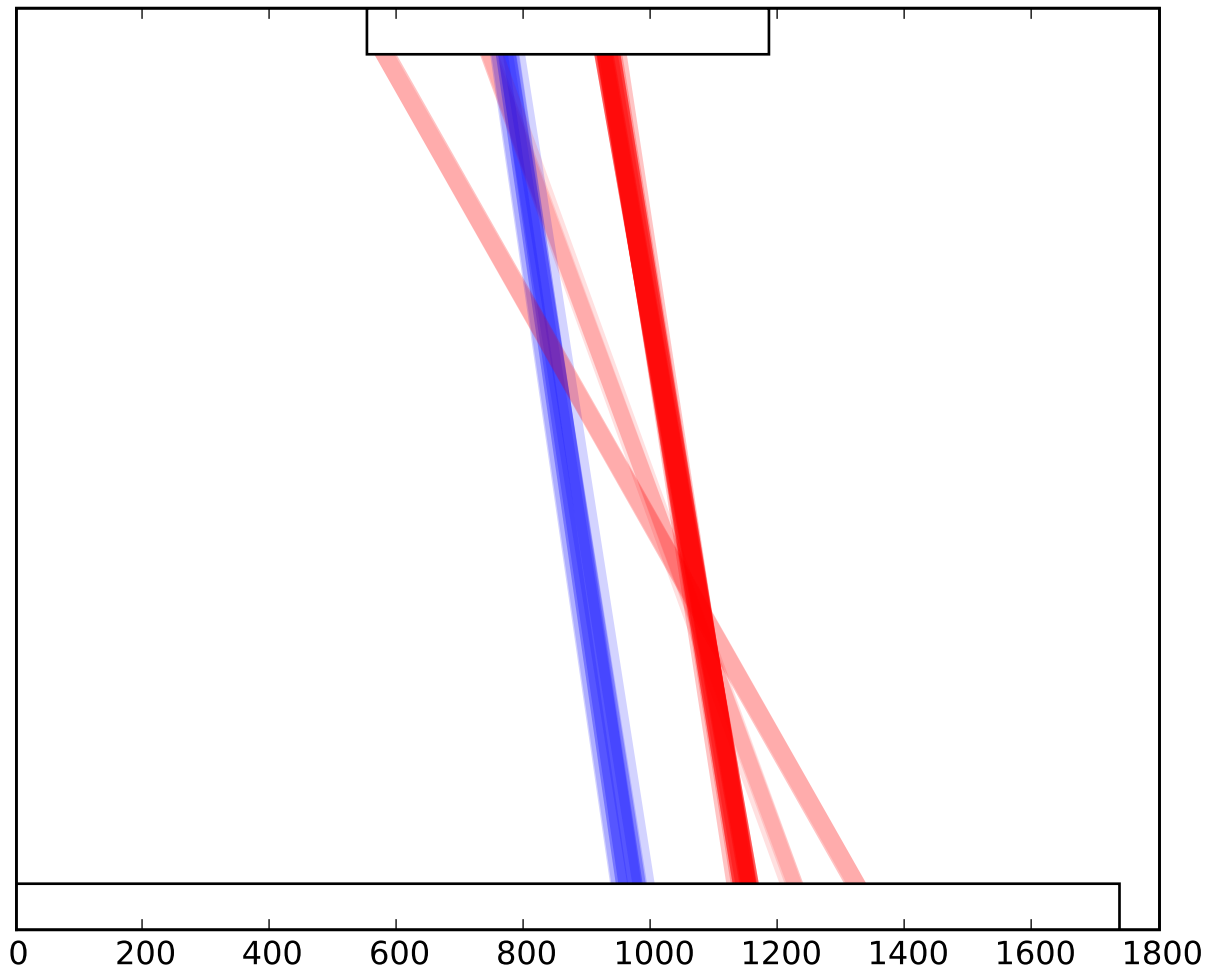

MHE\_dmel\_themira\_putris\_20-0.60-0.60.pdf

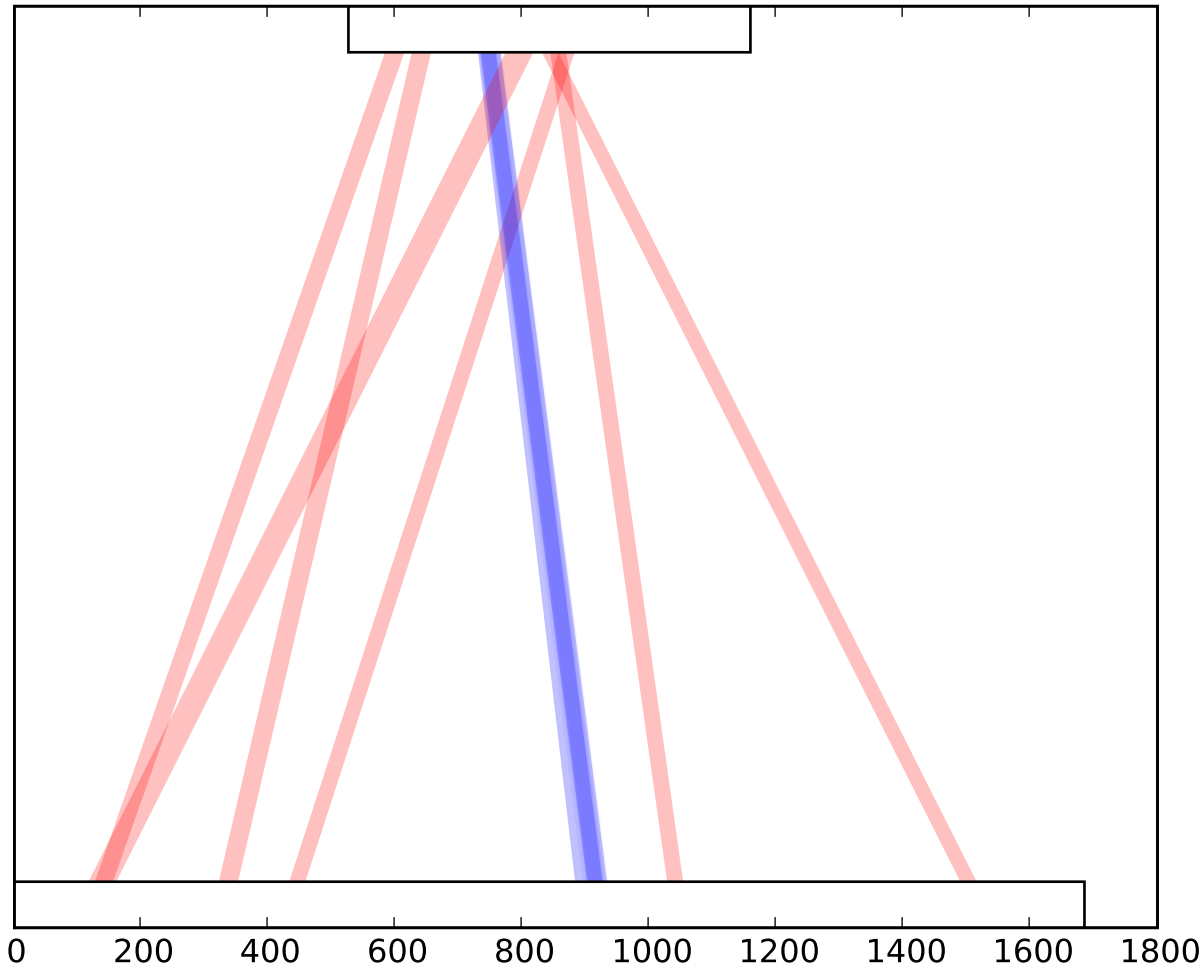



st2\_dmel\_dpse\_20-0.60-0.70.pdf

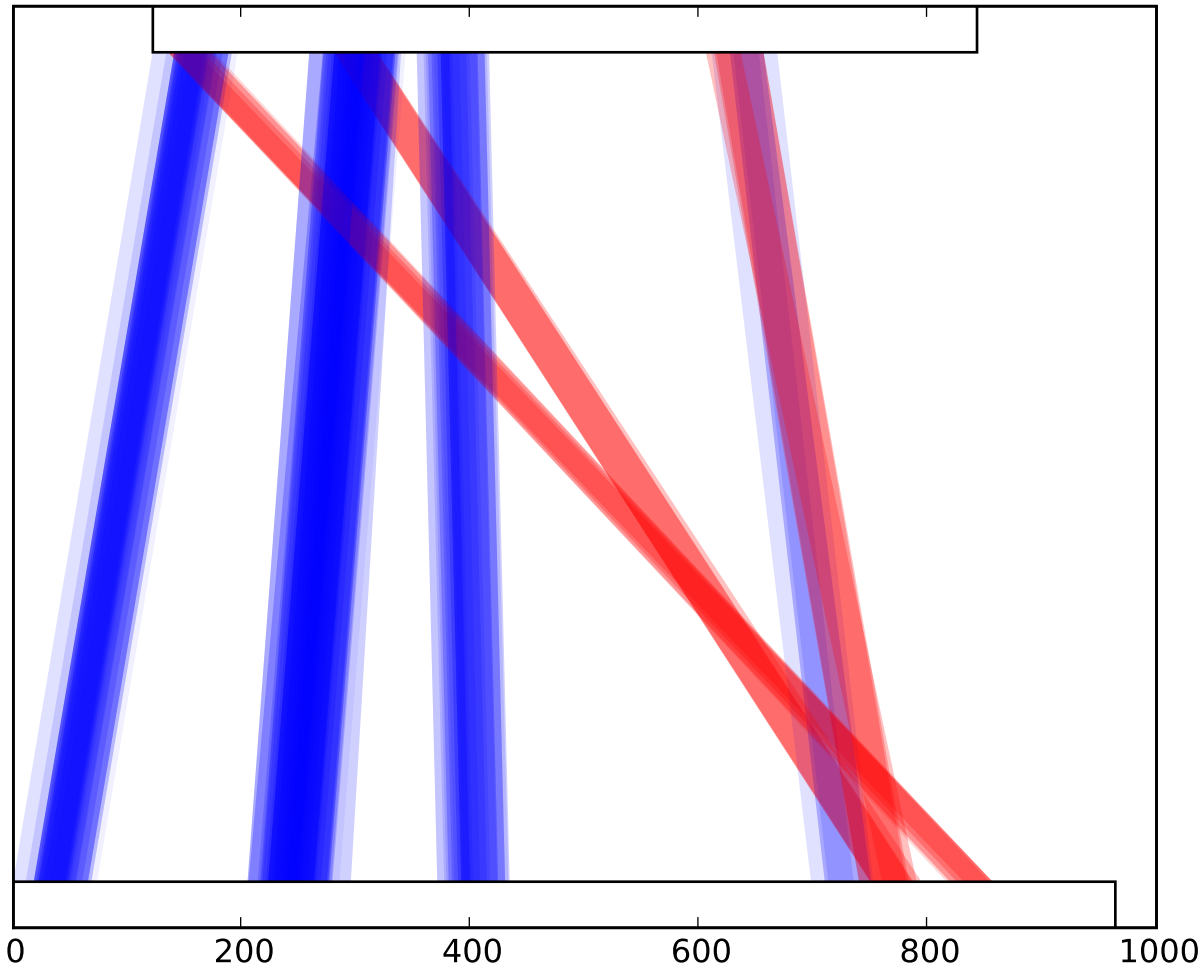

st2\_dmel\_dvir\_20-0.60-0.70.pdf

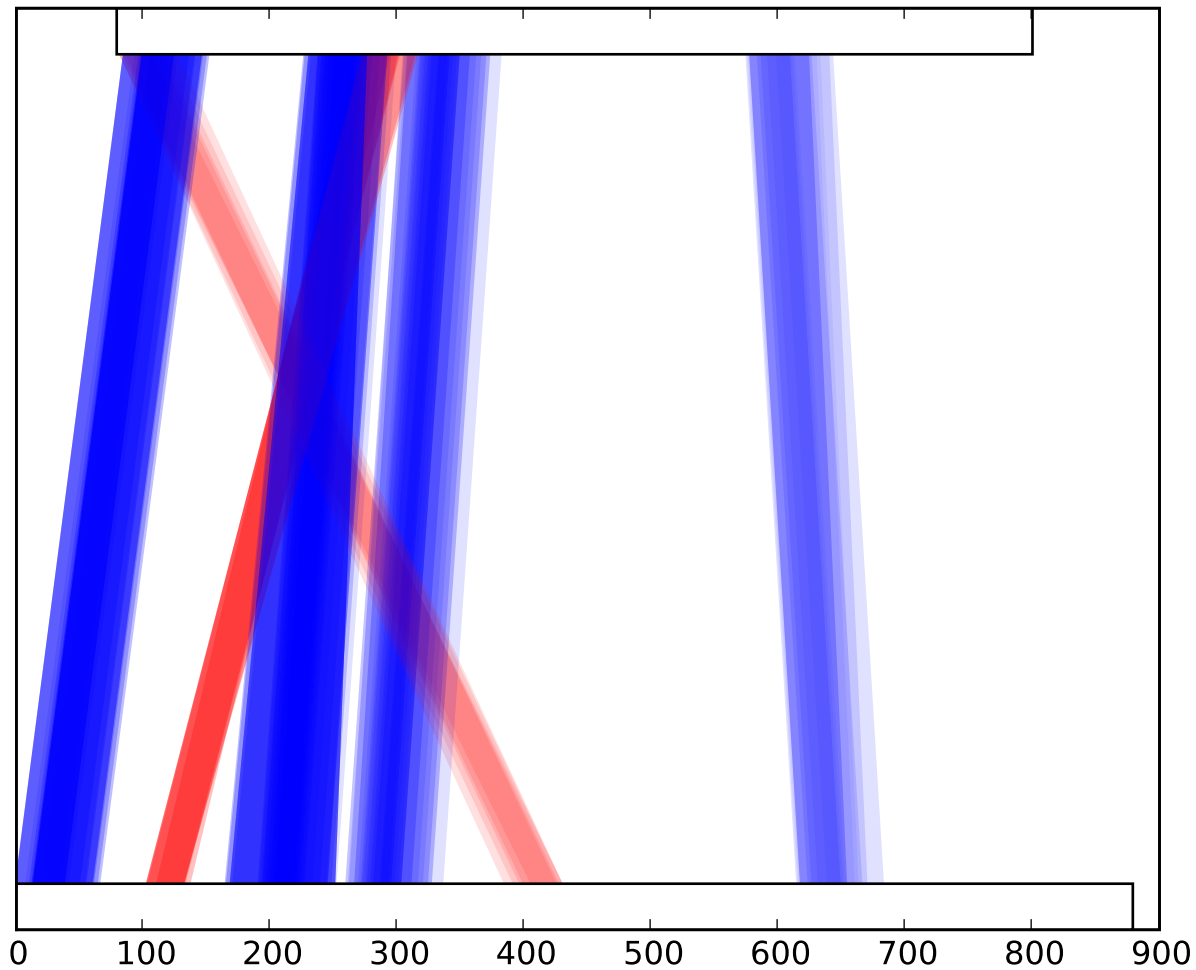

st2\_dmel\_sepsis\_cynipsea\_20-0.60-0.70.pdf

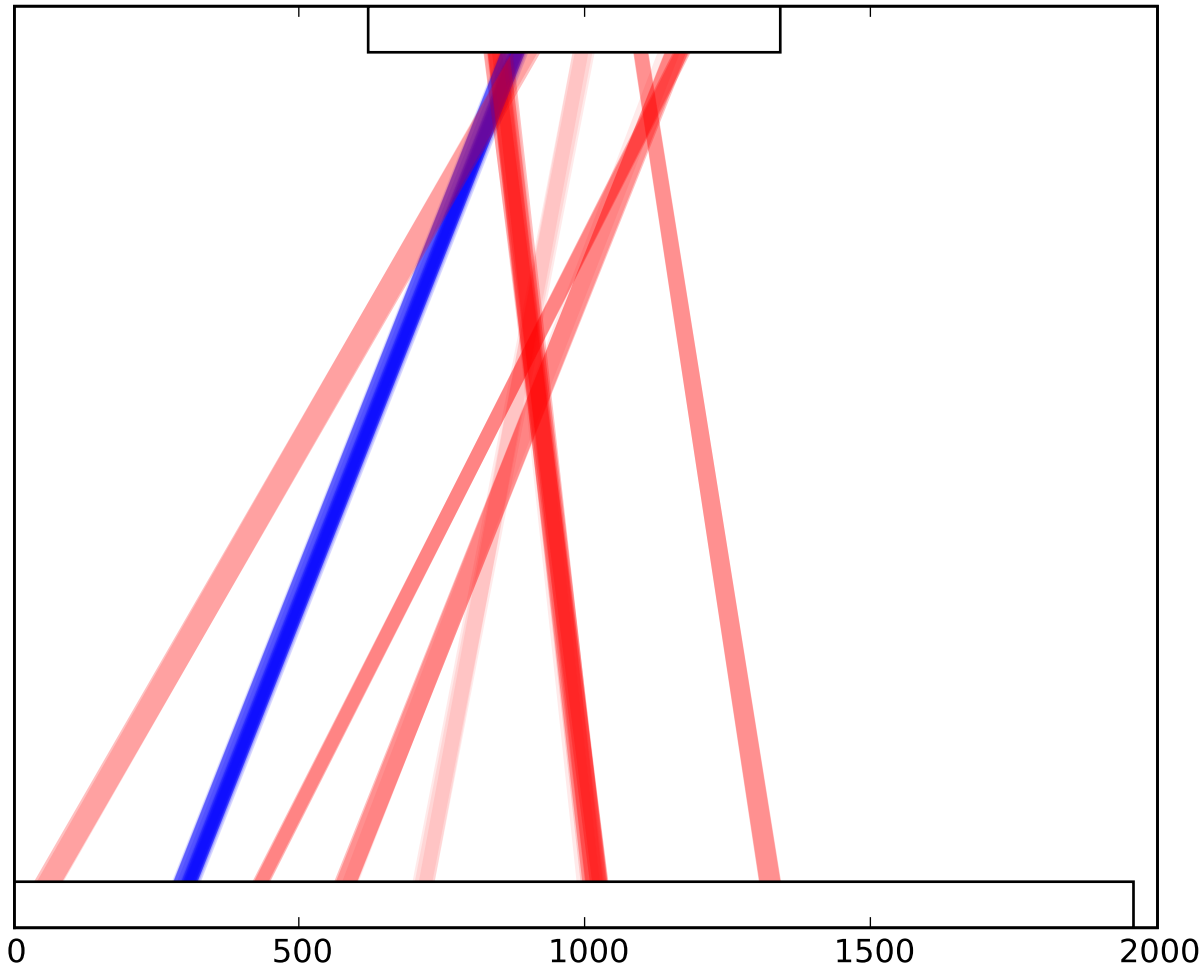

st2\_dmel\_themira\_putris\_20-0.60-0.70.pdf

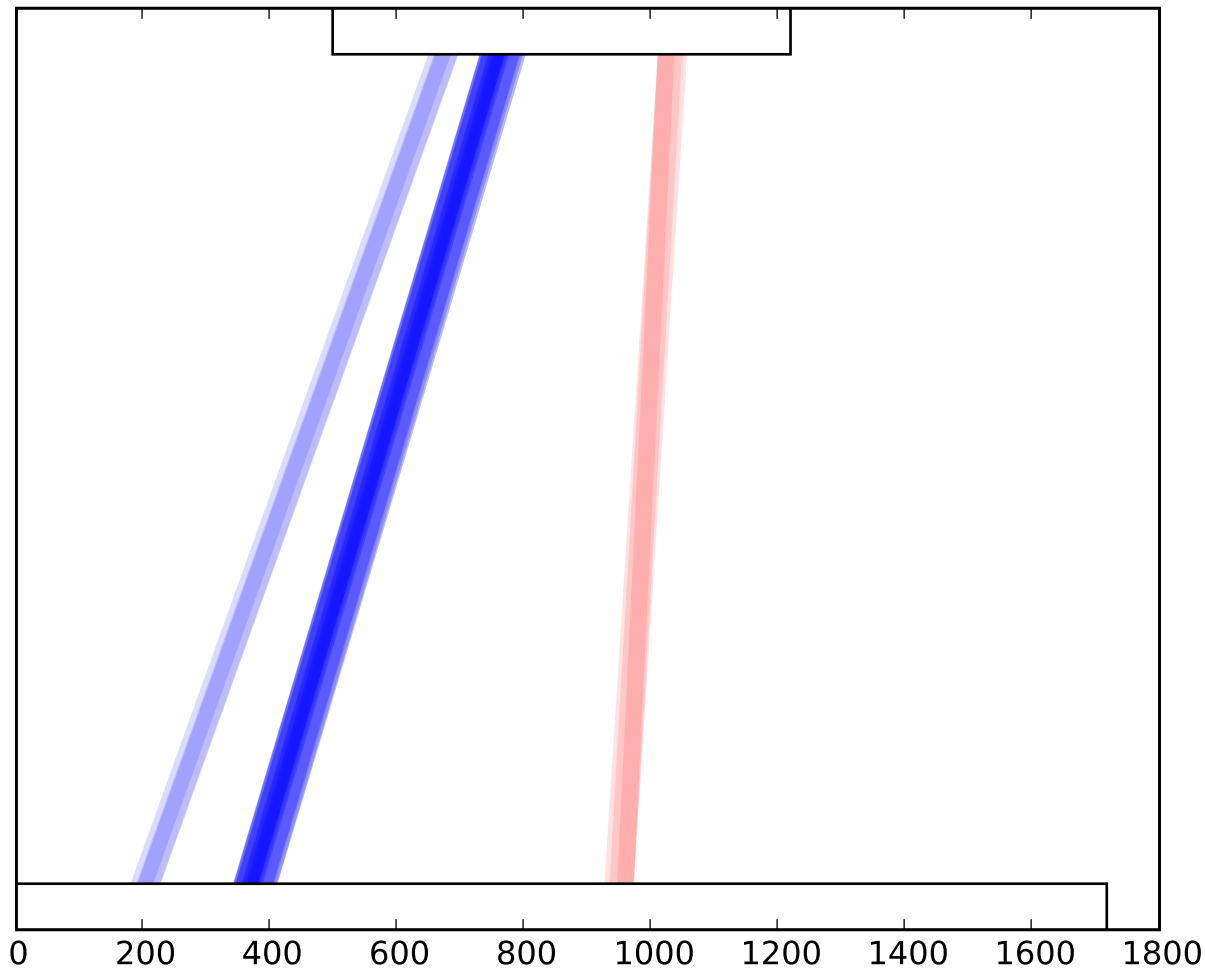

st37\_dmel\_dpse\_20-0.60-0.70.pdf

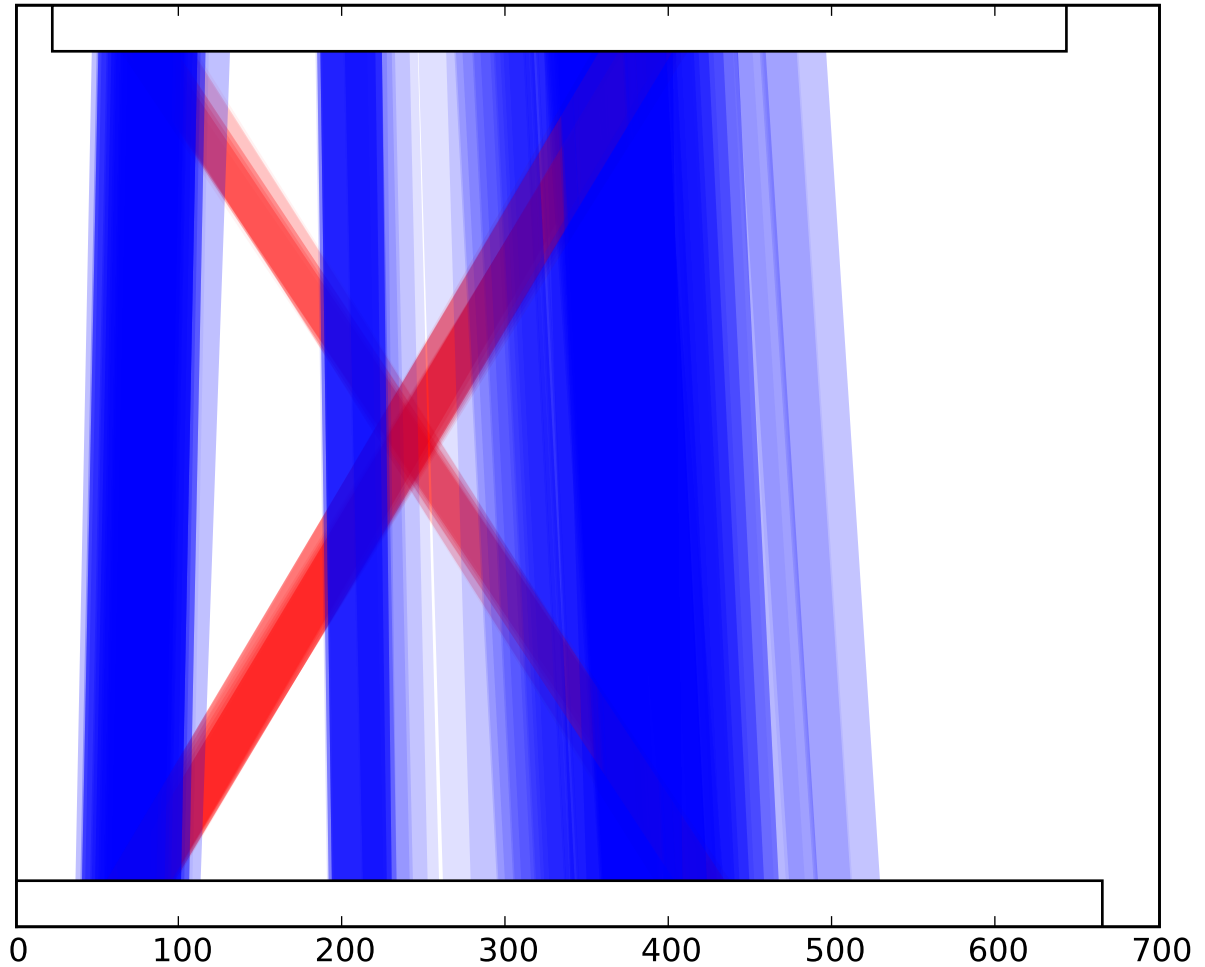

st37\_dmel\_dvir\_20-0.60-0.70.pdf

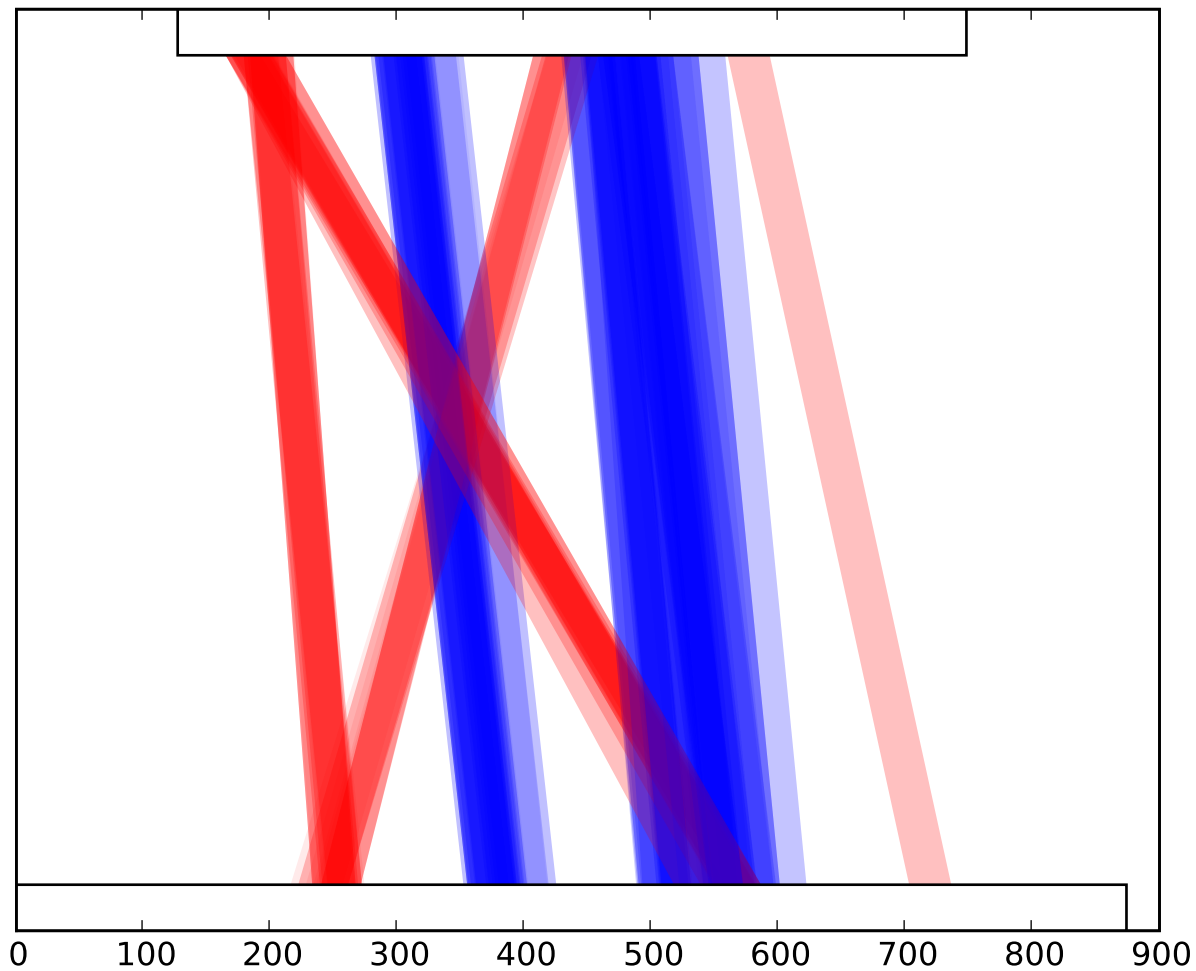

st37\_dmel\_sepsis\_cynipsea\_20-0.60-0.70.pdf

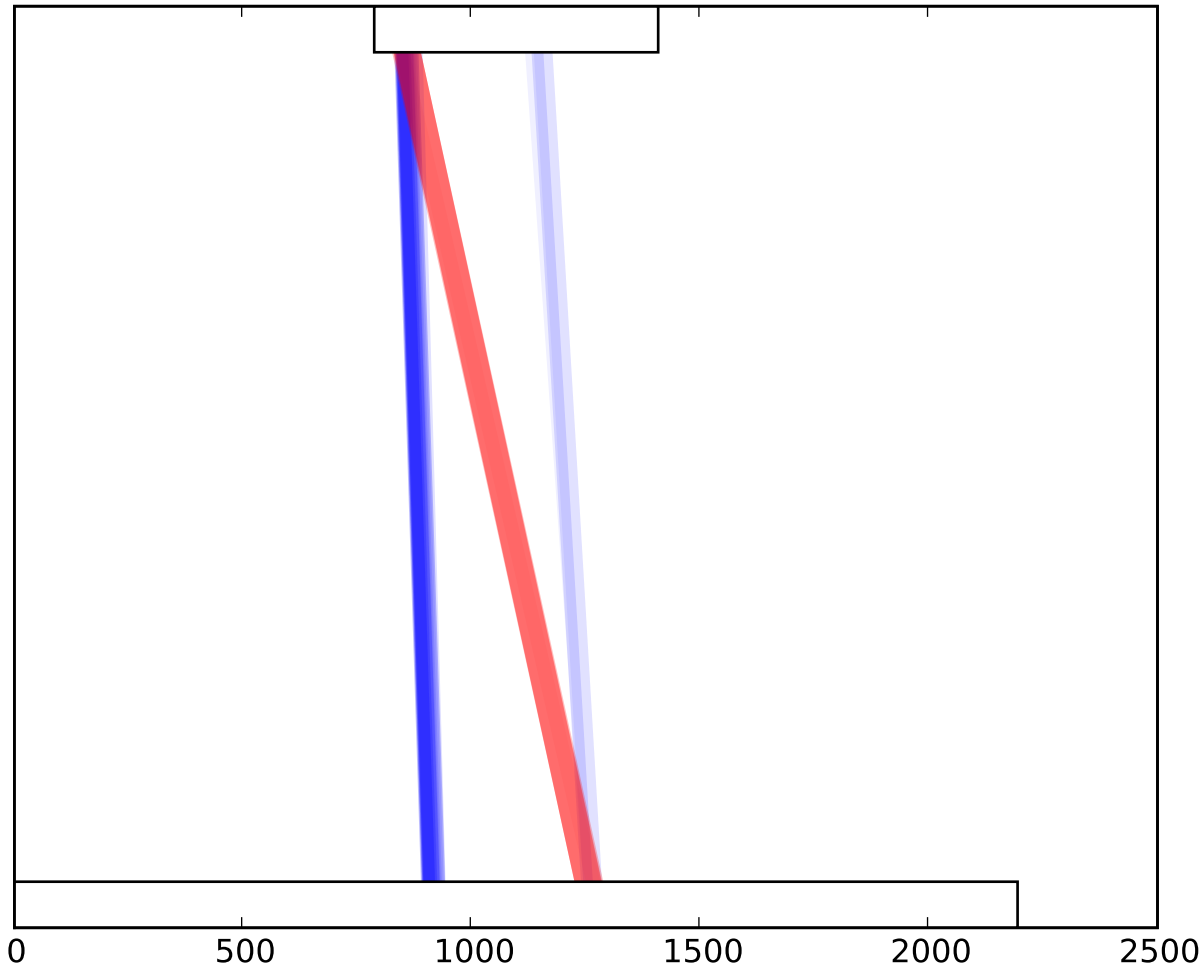

st37\_dmel\_themira\_putris\_20-0.60-0.70.pdf

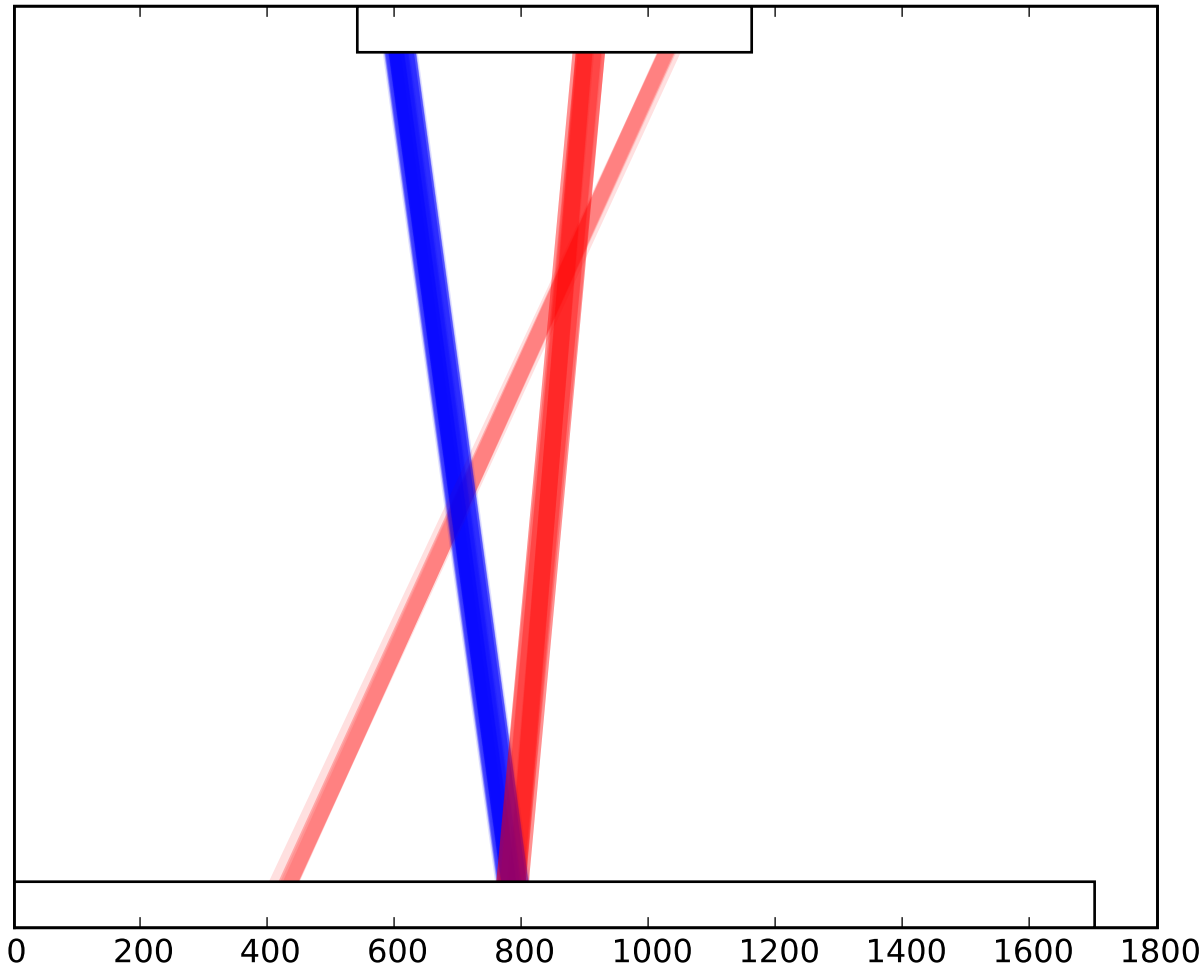



st46\_dmel\_dpse\_20-0.60-0.70.pdf

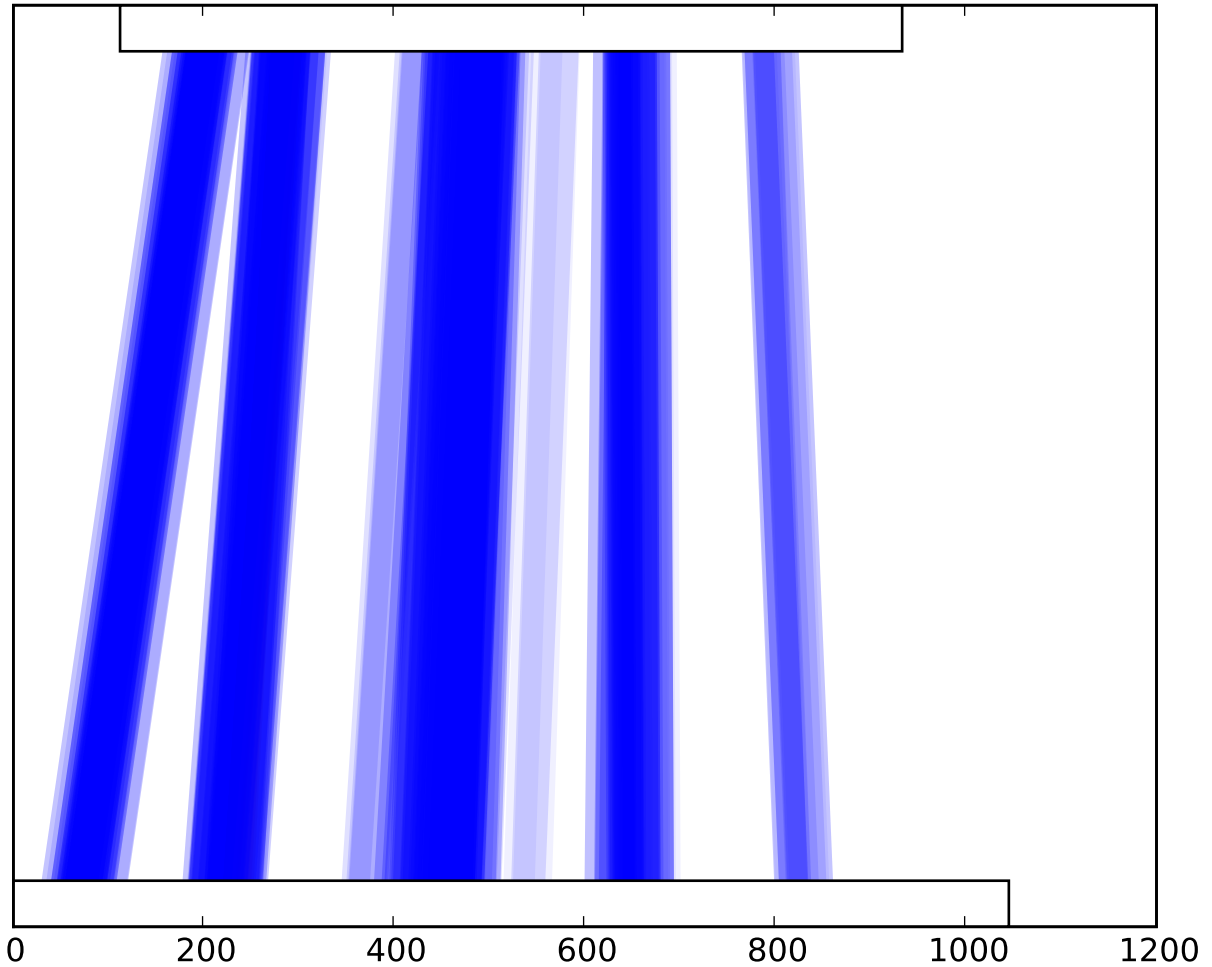

st46\_dmel\_dvir\_20-0.60-0.70.pdf

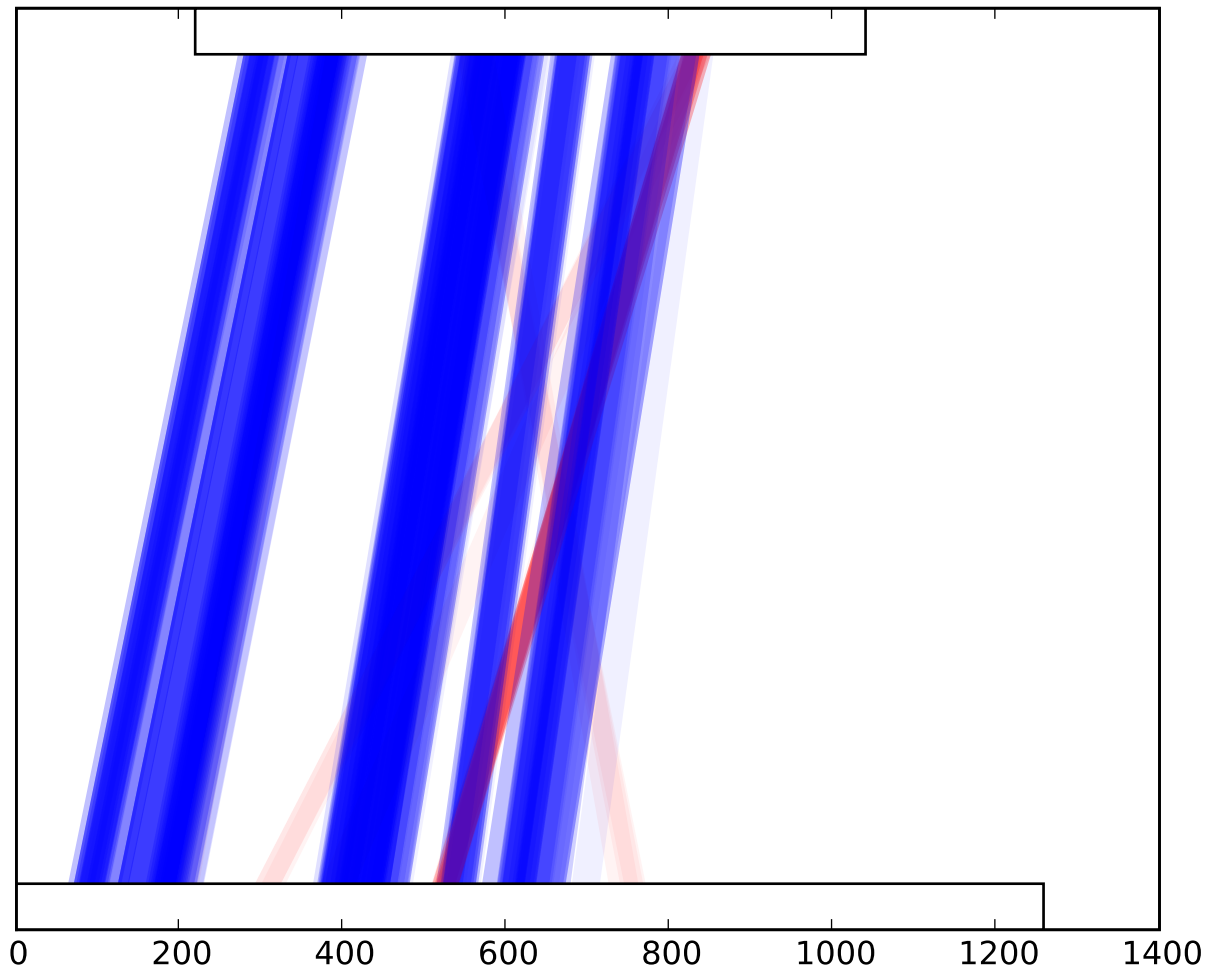

st46\_dmel\_sepsis\_cynipsea\_20-0.60-0.70.pdf

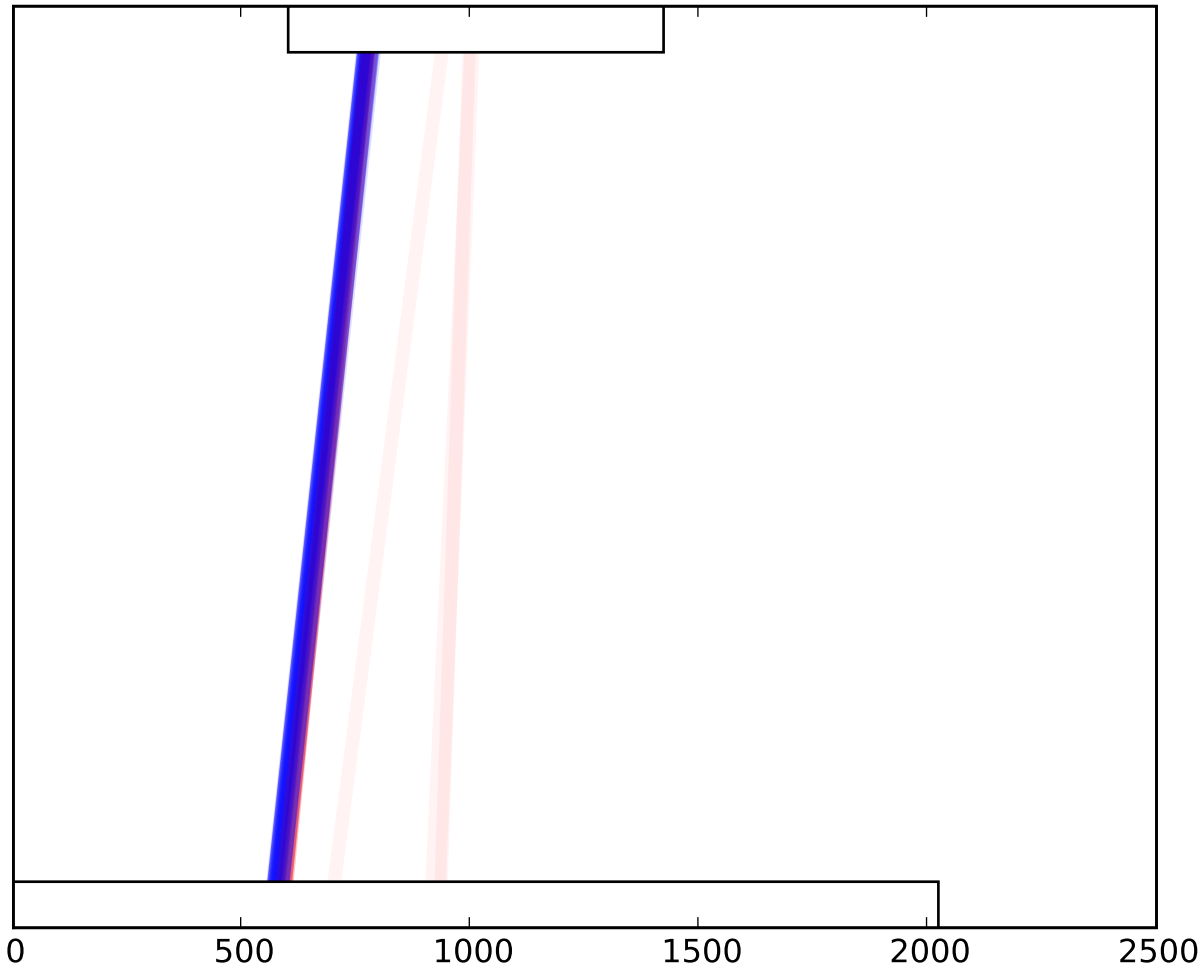

st46\_dmel\_themira\_putris\_20-0.60-0.70.pdf

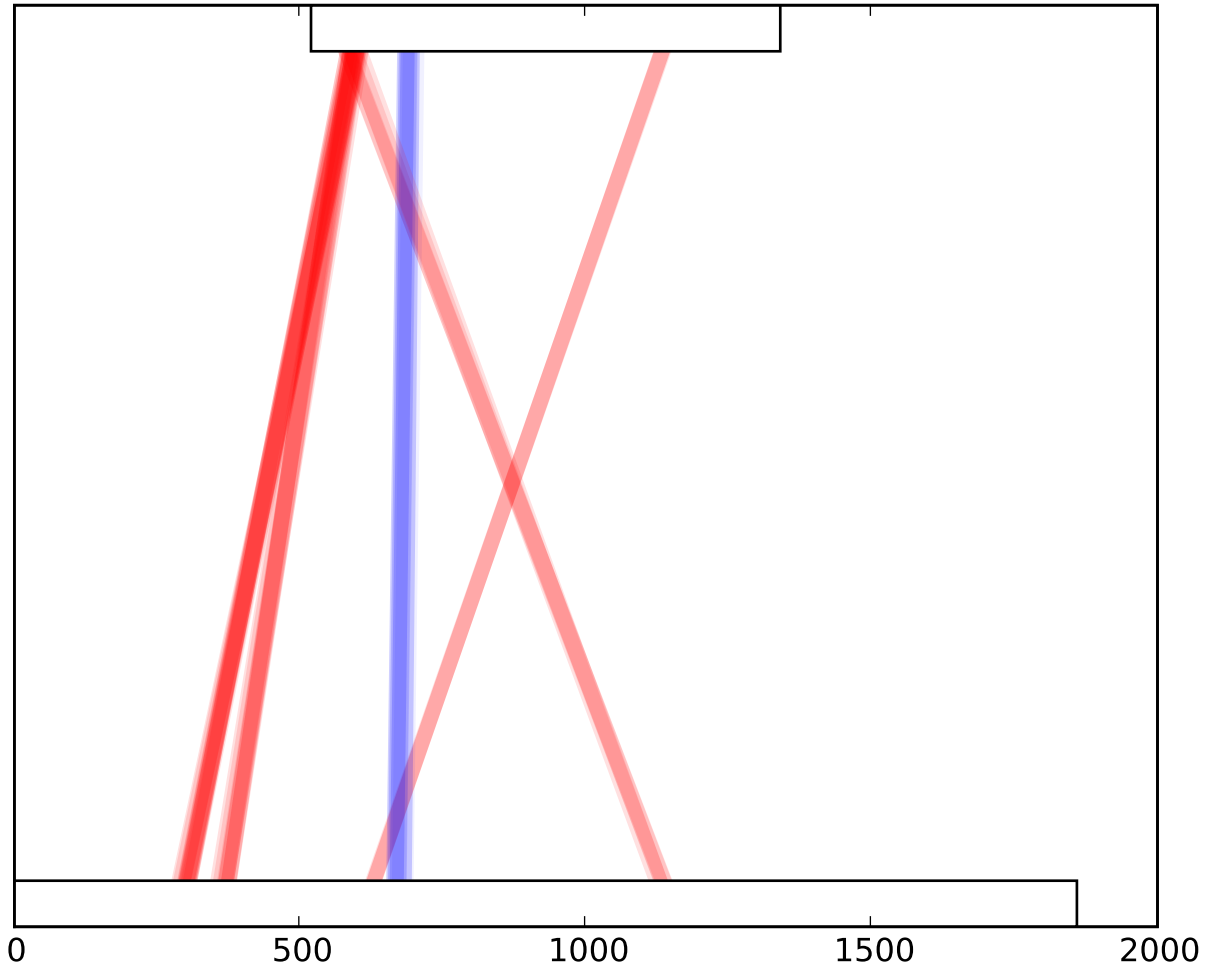

MHE\_dmel\_dpse\_20-0.60-0.70.pdf

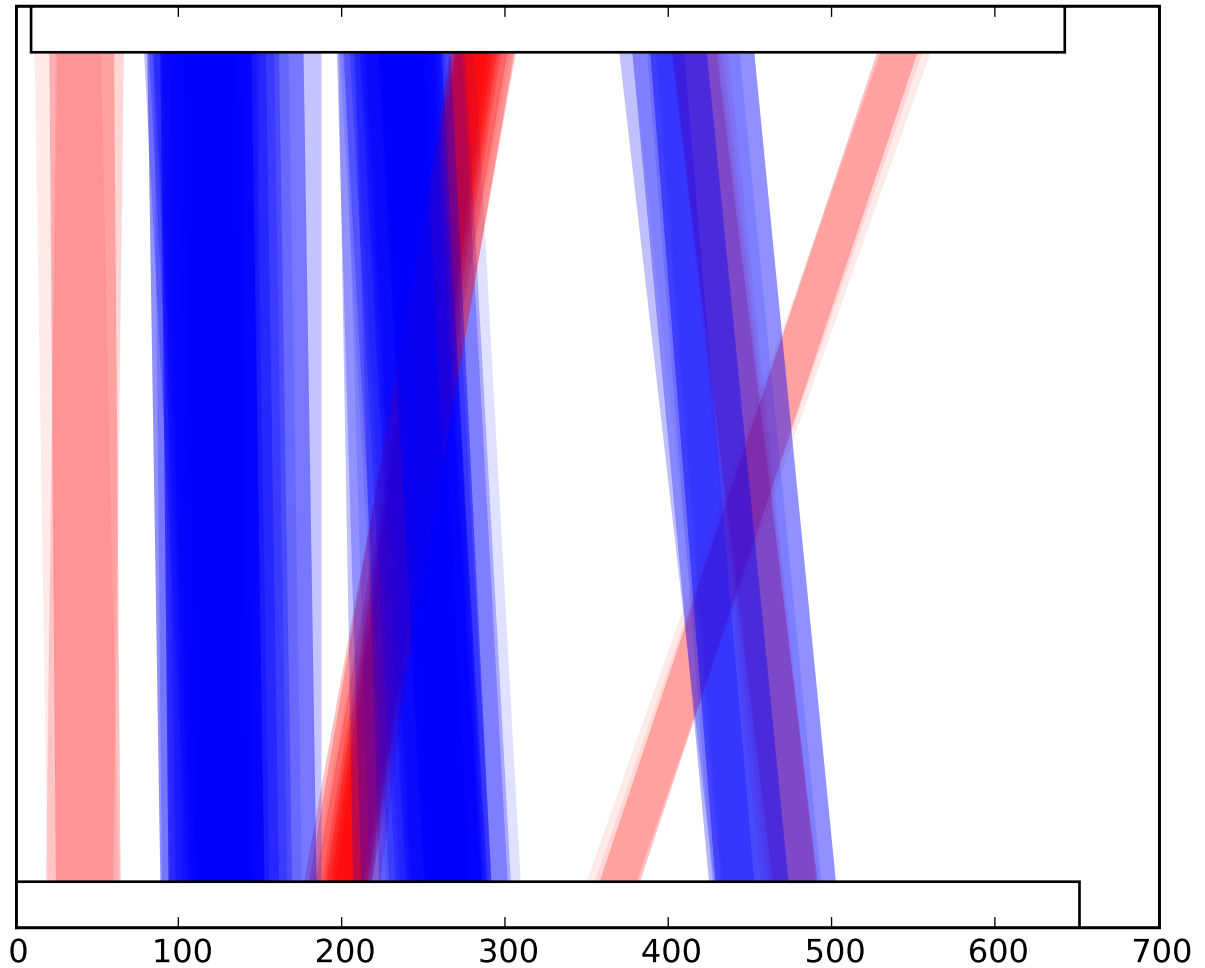

MHE\_dmel\_dvir\_20-0.60-0.70.pdf

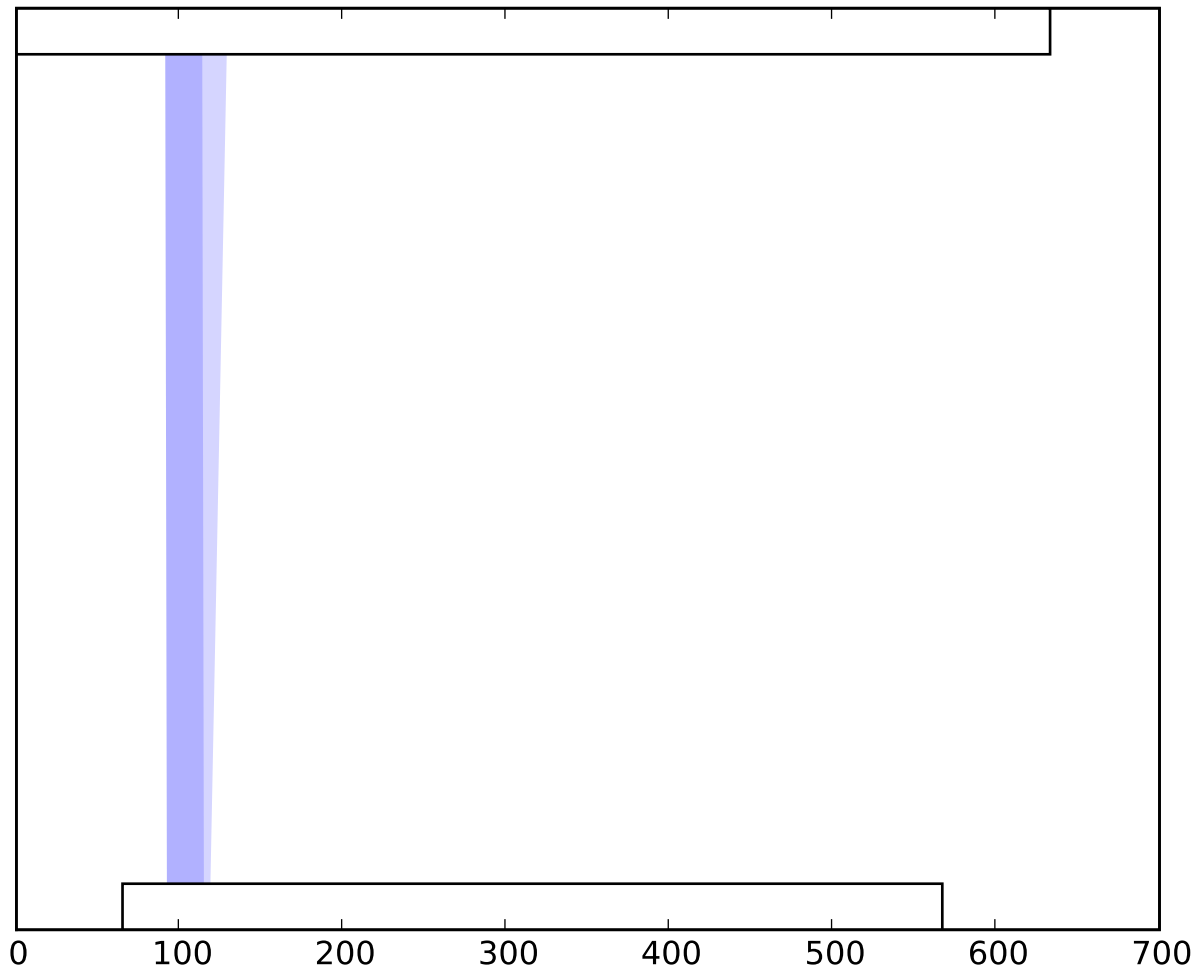

MHE\_dmel\_sepsis\_cynipsea\_20-0.60-0.70.pdf

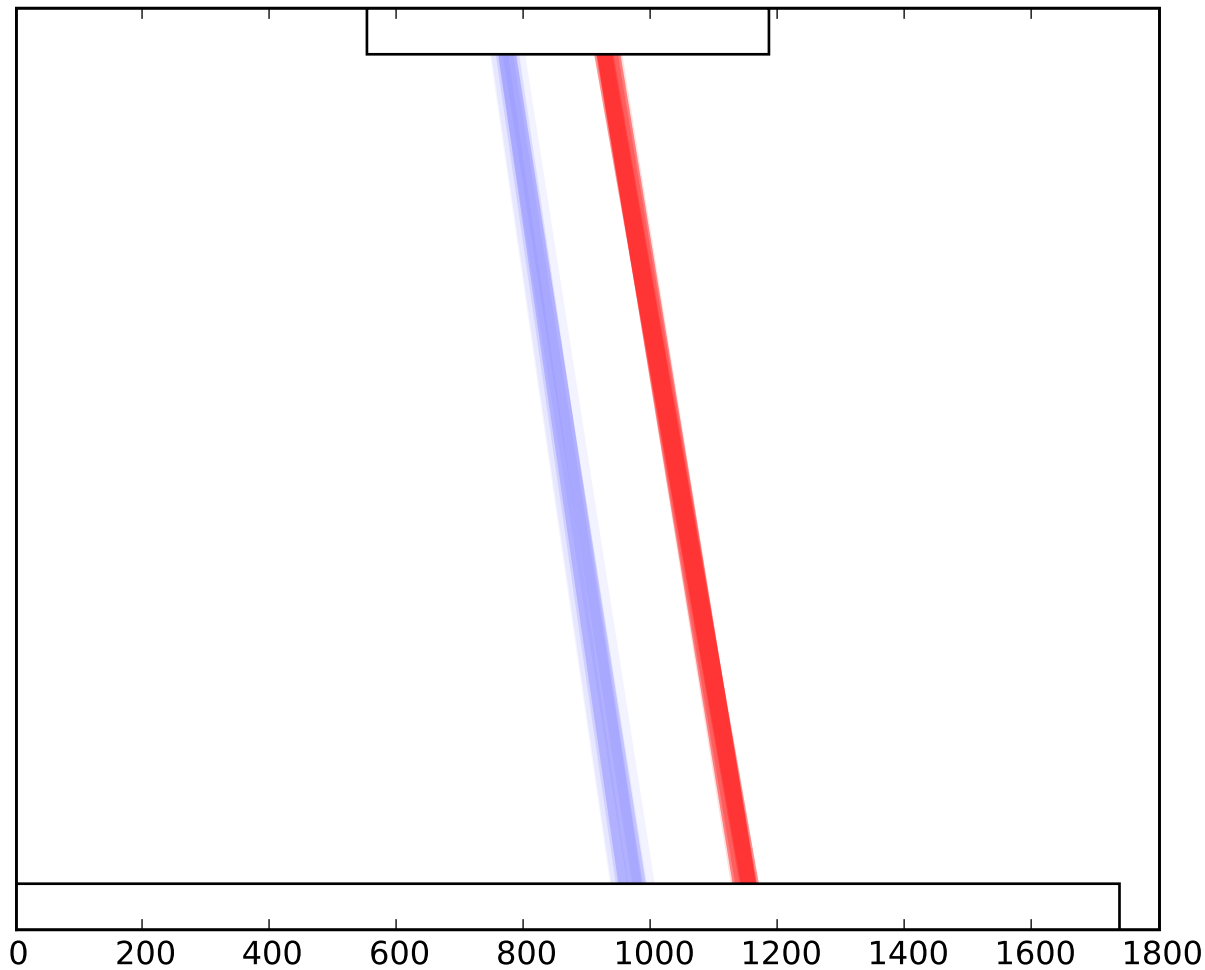

MHE\_dmel\_themira\_putris\_20-0.60-0.70.pdf





st2\_dmel\_dpse\_14-0.60-0.50.pdf

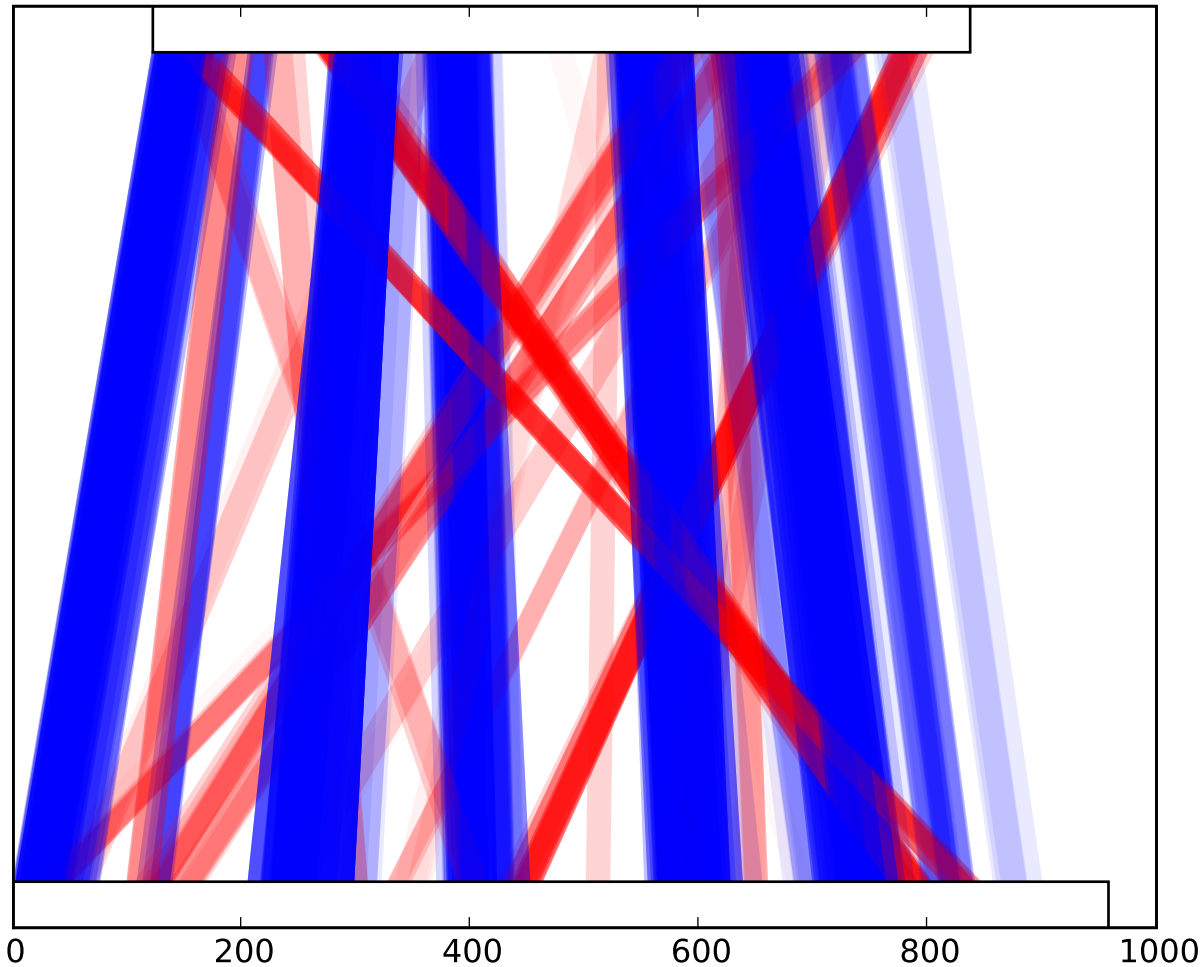

st2\_dmel\_dvir\_14-0.60-0.50.pdf

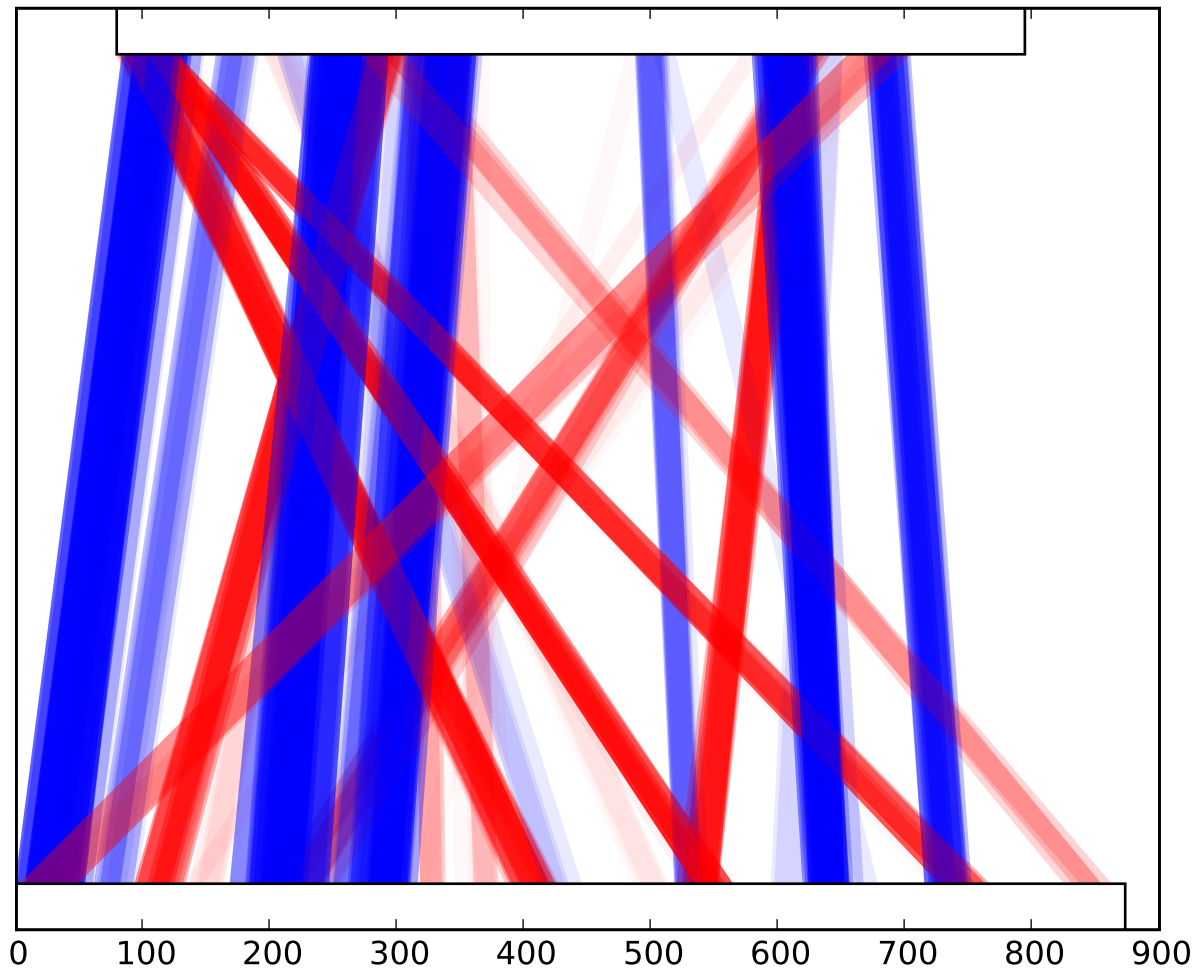

st2\_dmel\_sepsis\_cynipsea\_14-0.60-0.50.pdf

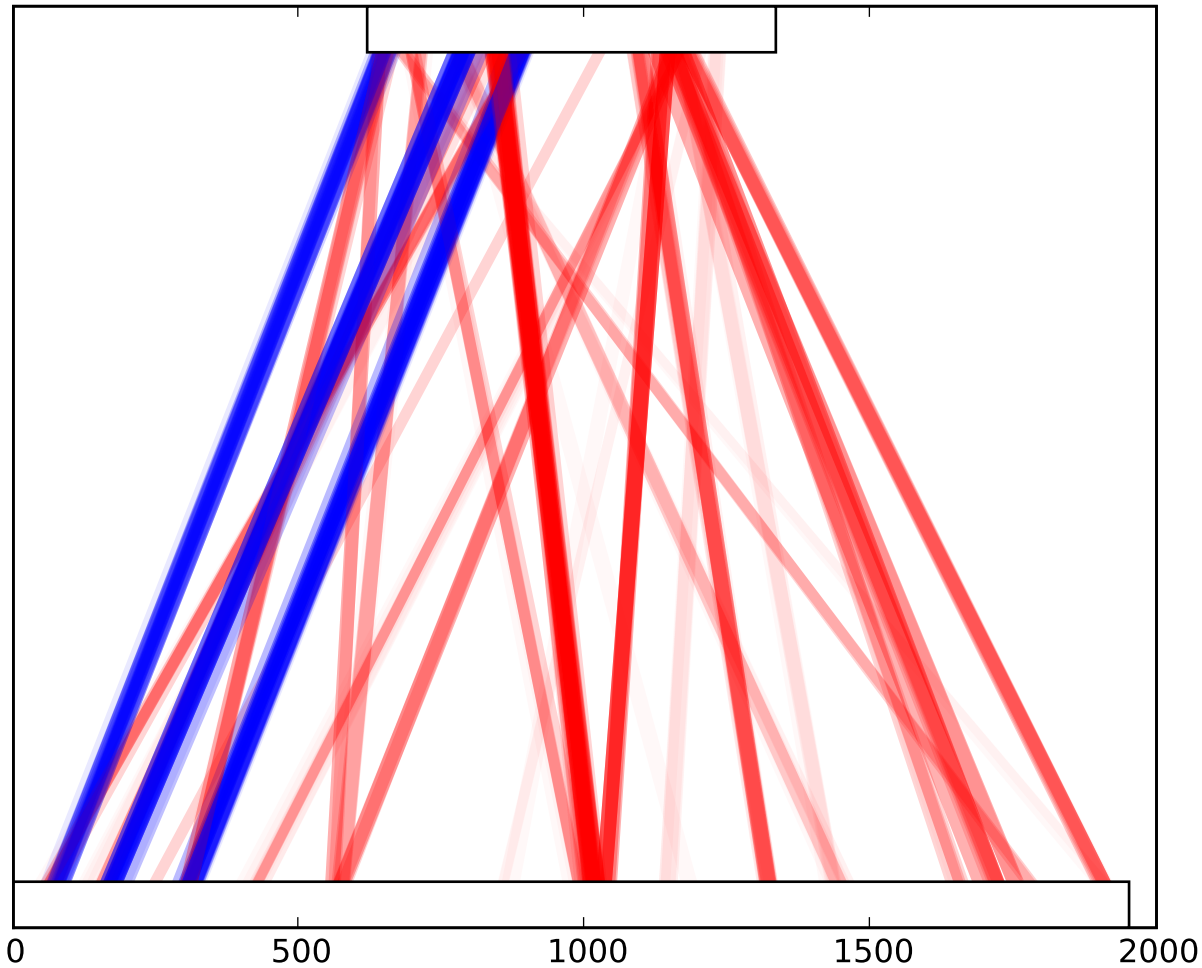

st2\_dmel\_themira\_putris\_14-0.60-0.50.pdf

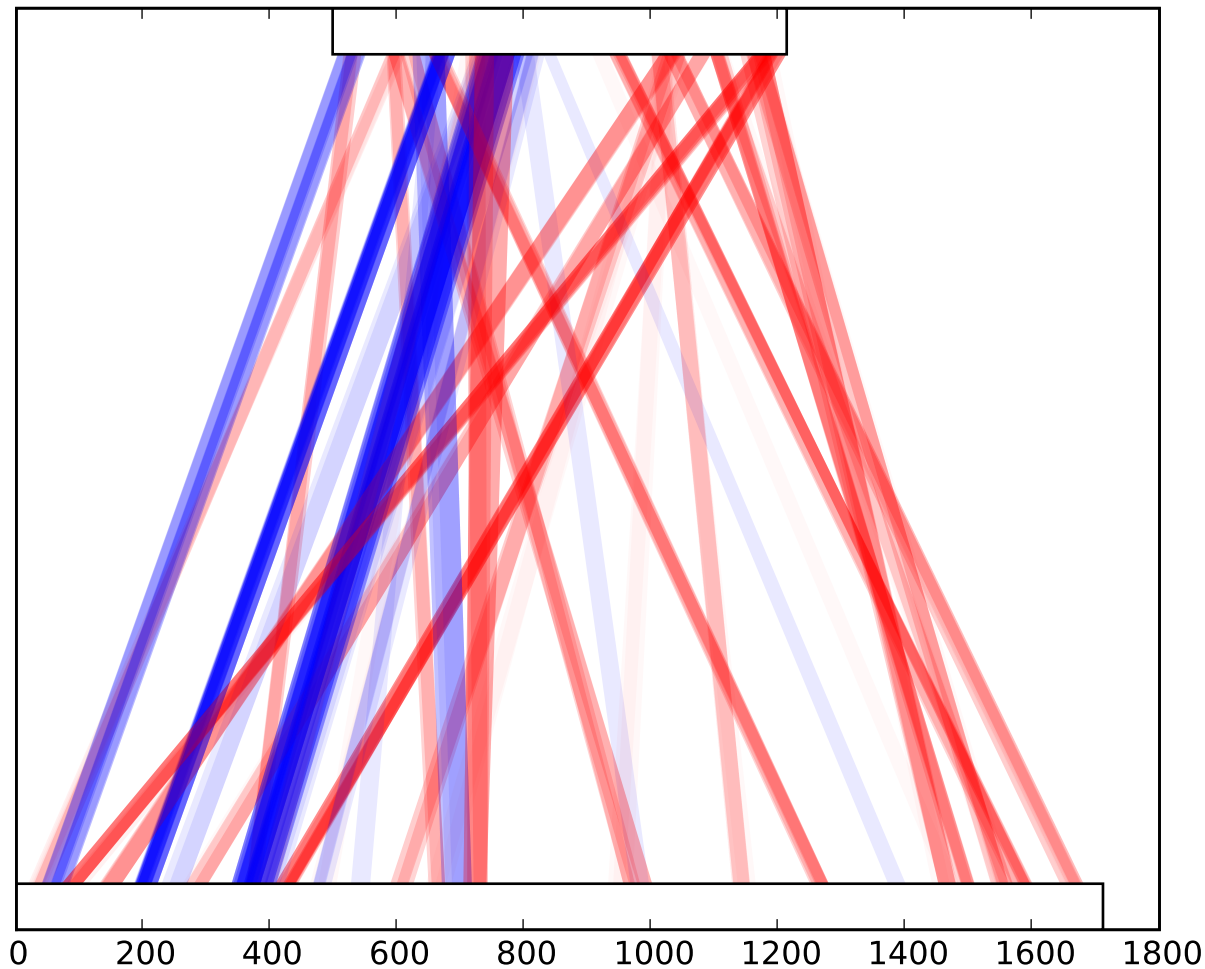

st37\_dmel\_dpse\_14-0.60-0.50.pdf

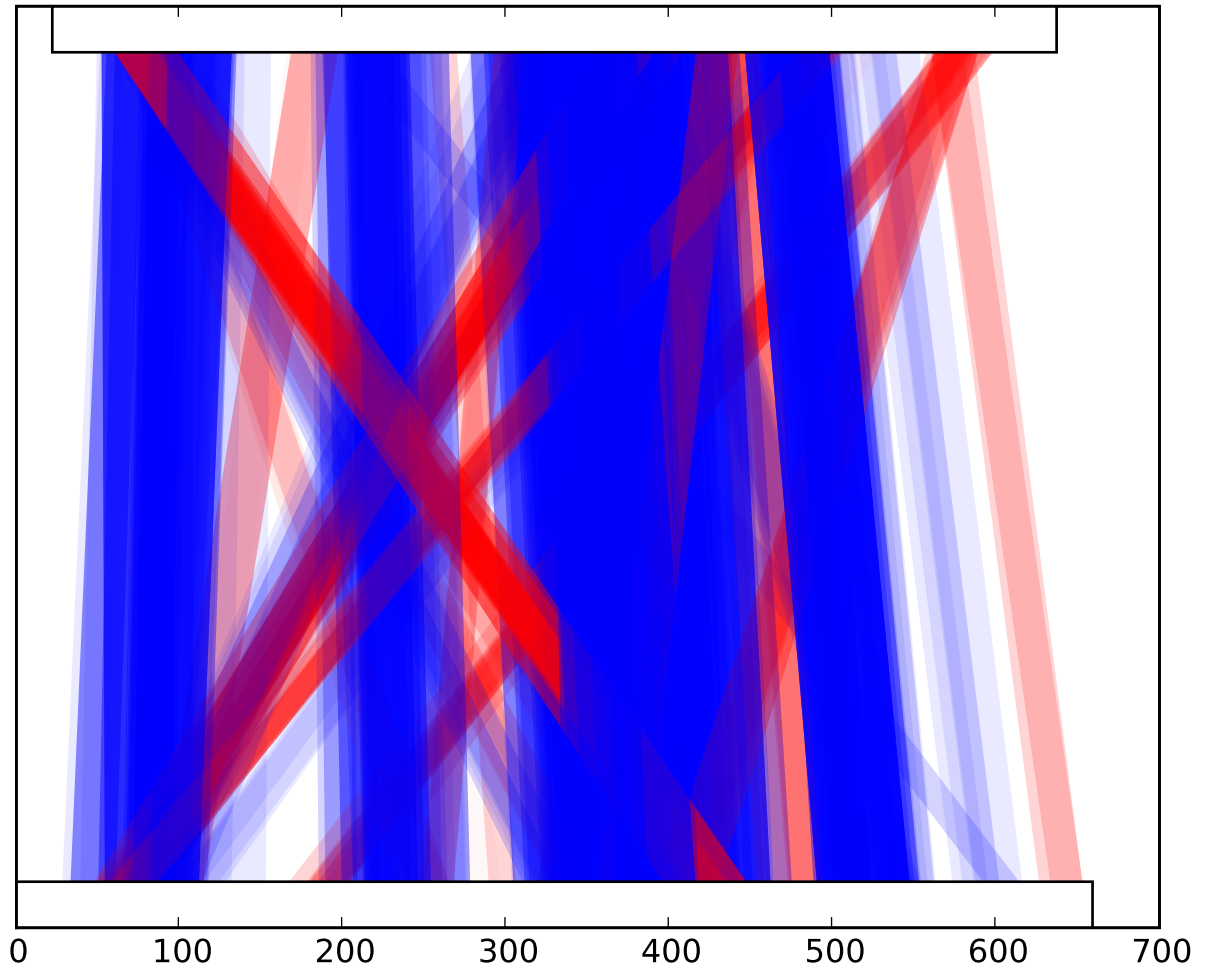

st37\_dmel\_dvir\_14-0.60-0.50.pdf

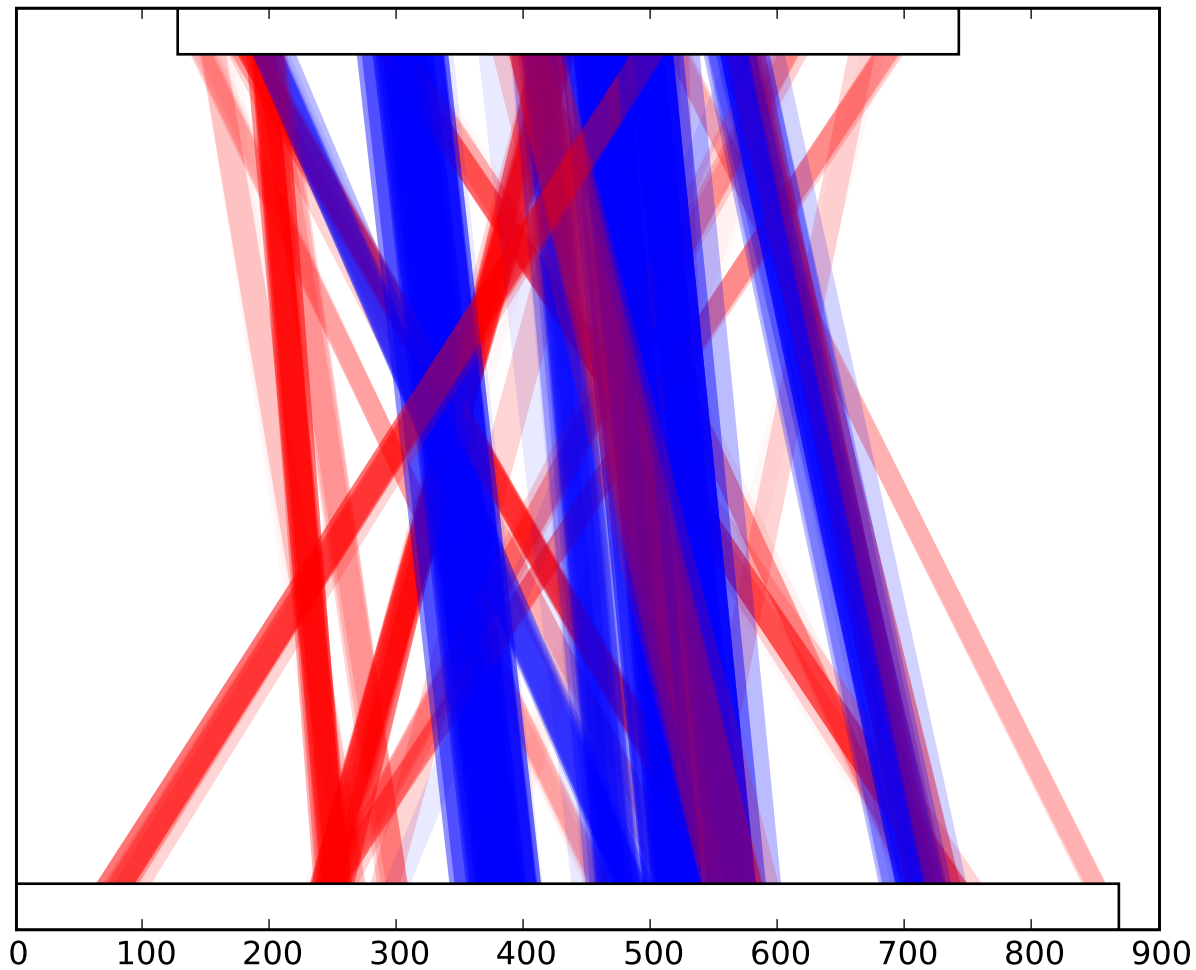

st37\_dmel\_sepsis\_cynipsea\_14-0.60-0.50.pdf

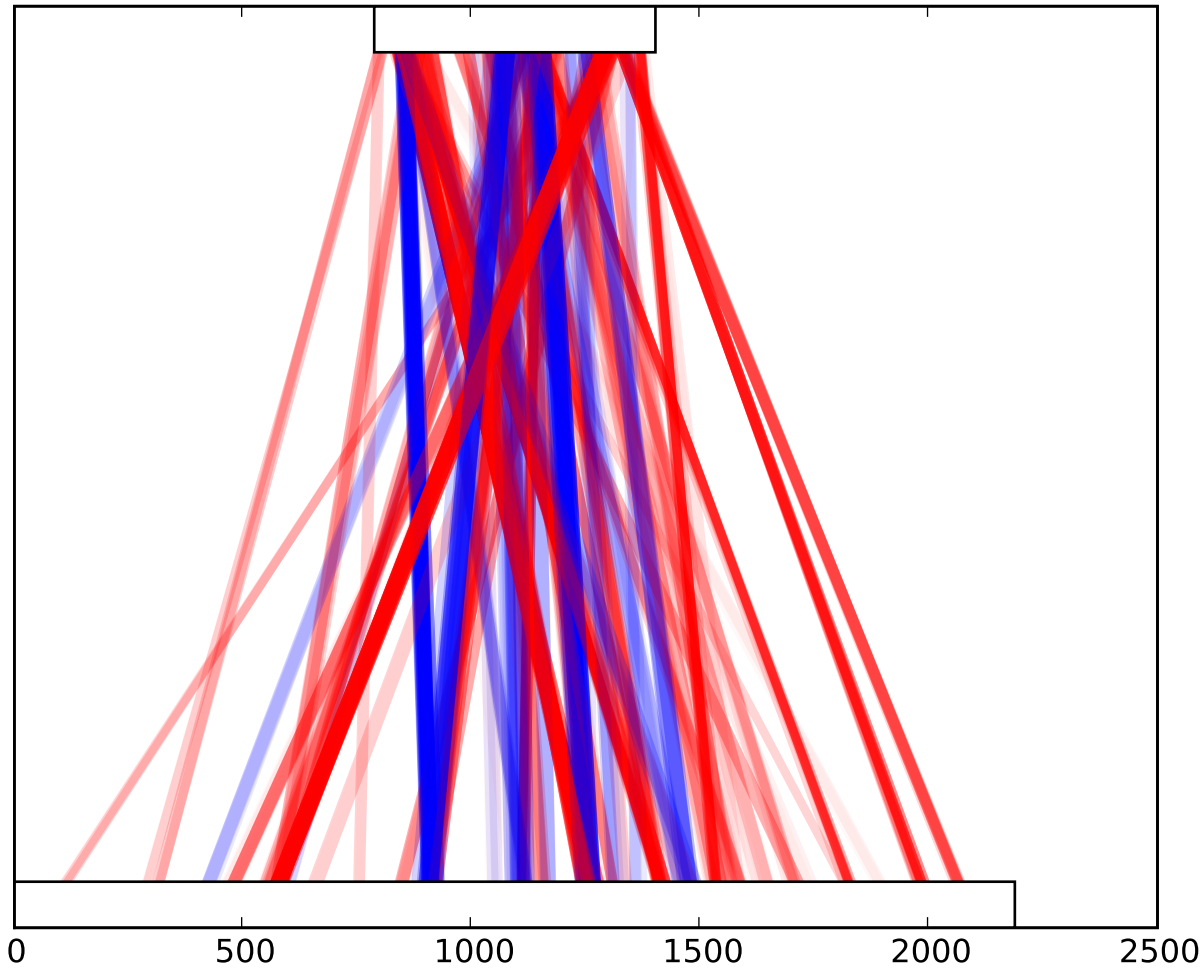

st37\_dmel\_themira\_putris\_14-0.60-0.50.pdf

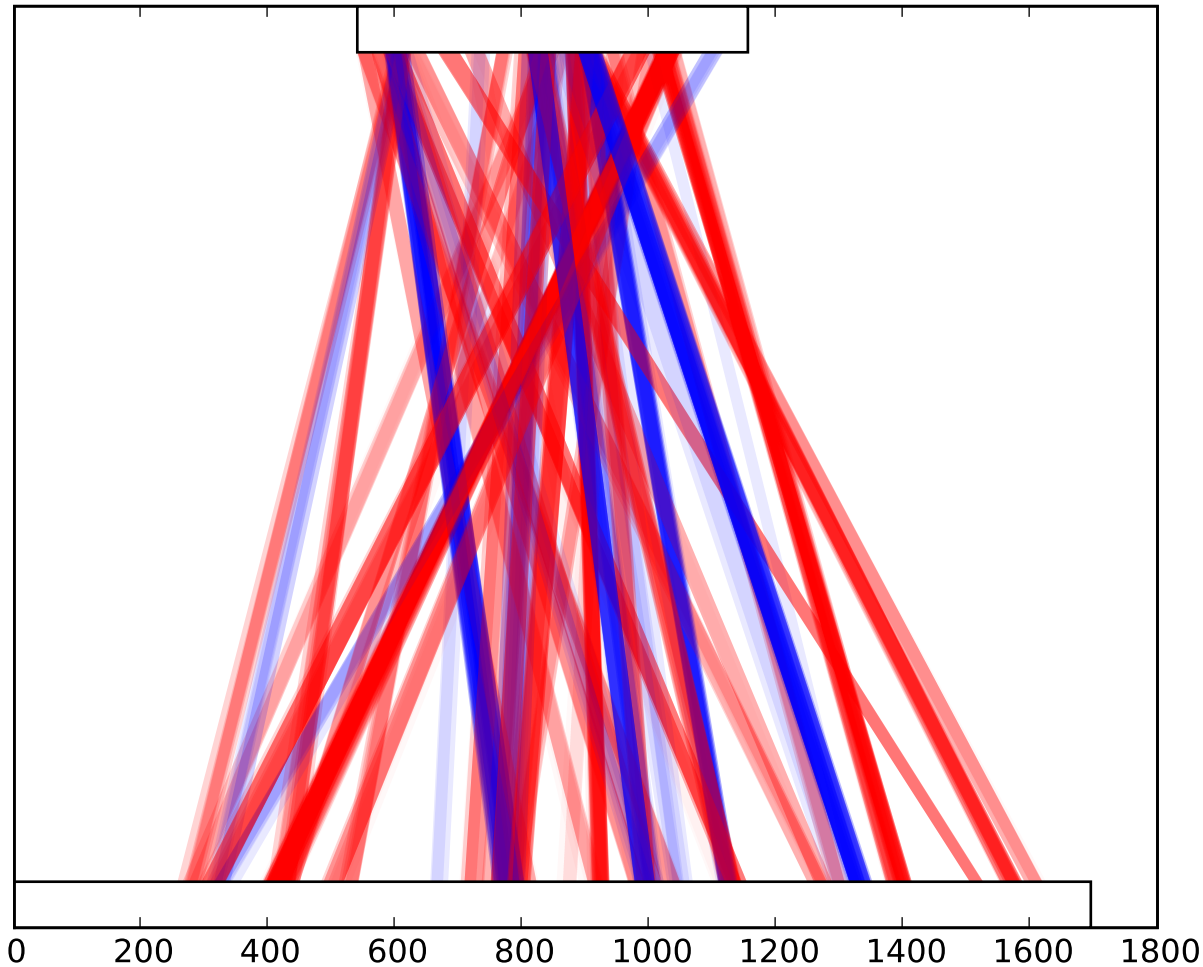



st46\_dmel\_dpse\_14-0.60-0.50.pdf

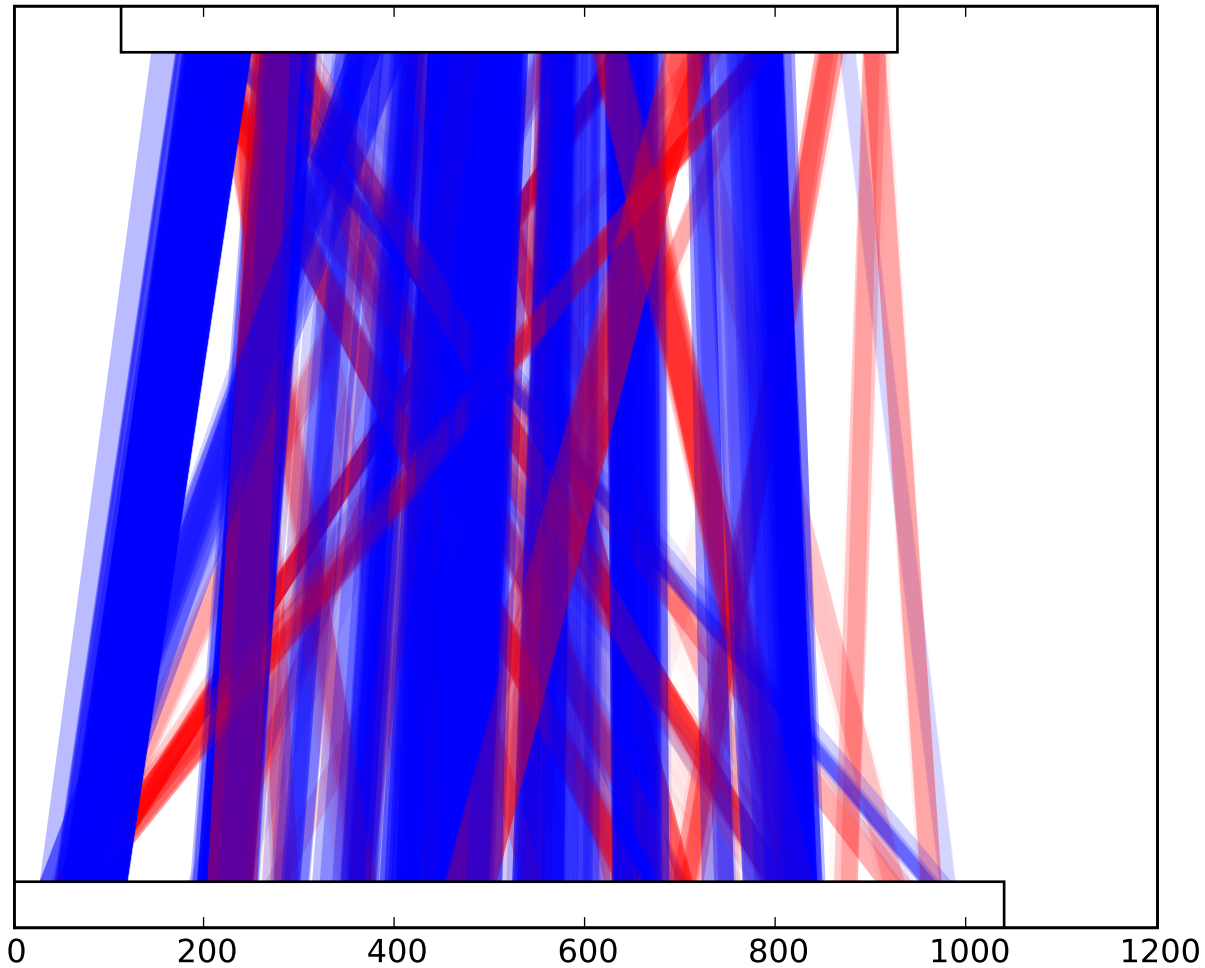

st46\_dmel\_dvir\_14-0.60-0.50.pdf

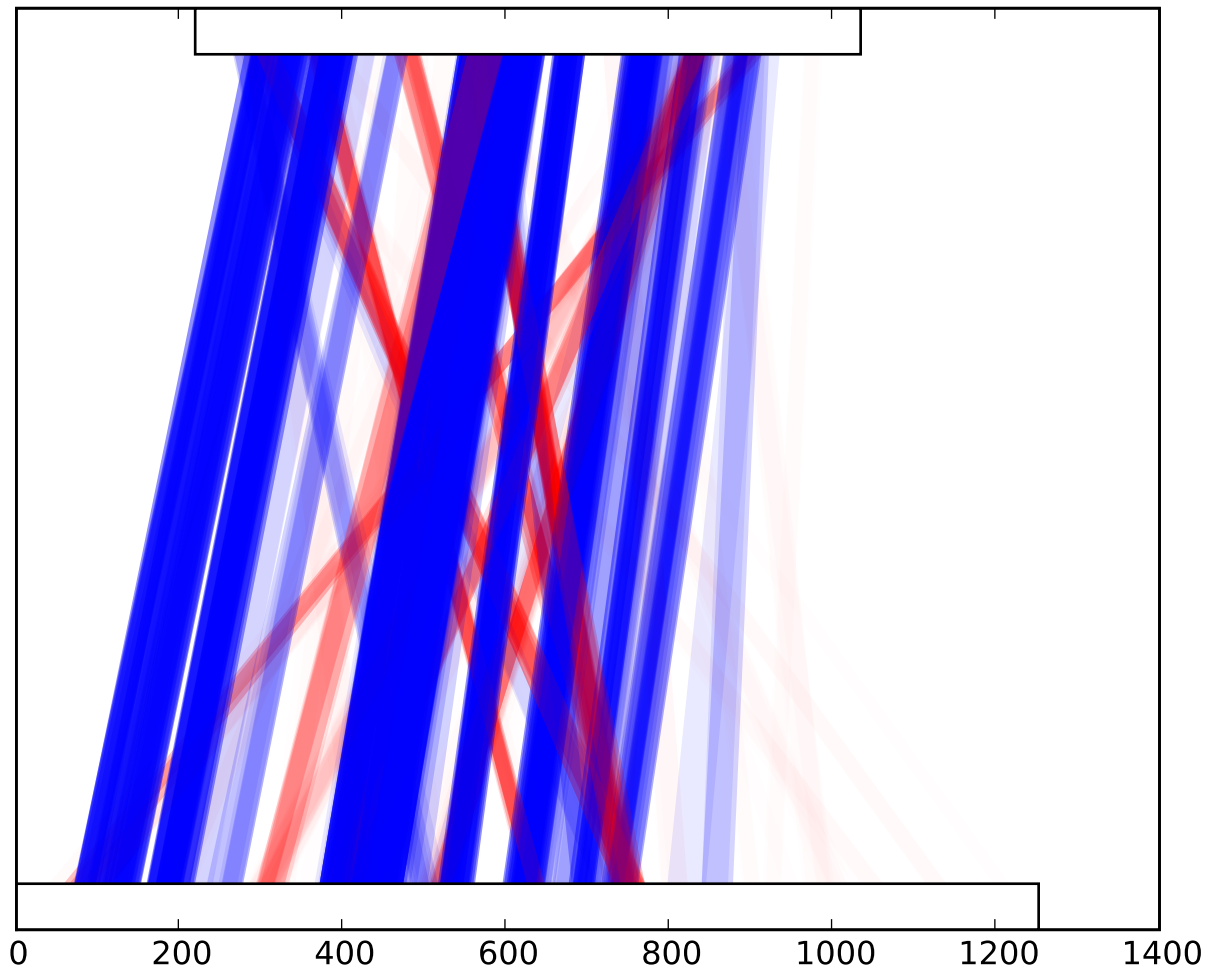

st46\_dmel\_sepsis\_cynipsea\_14-0.60-0.50.pdf

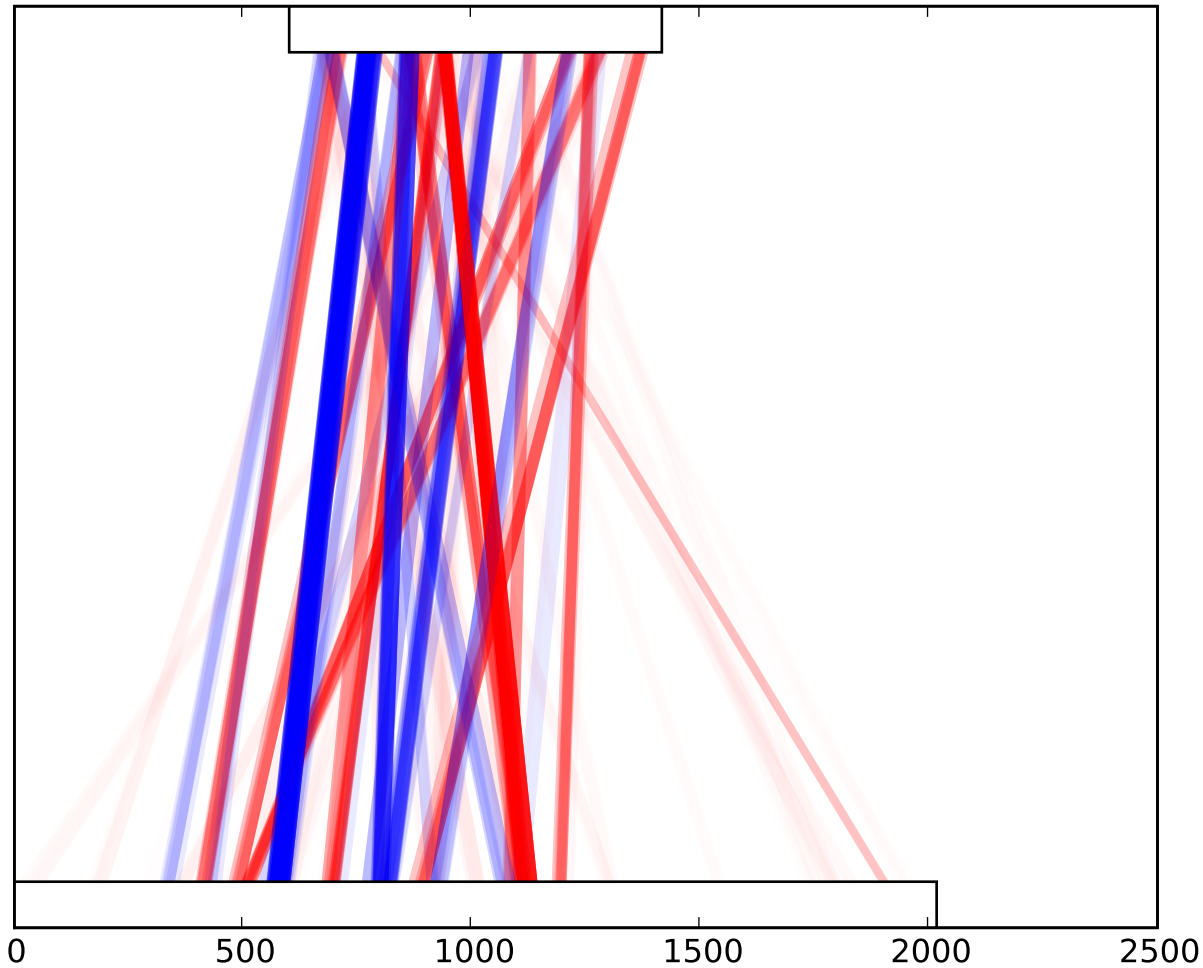

st46\_dmel\_themira\_putris\_14-0.60-0.50.pdf

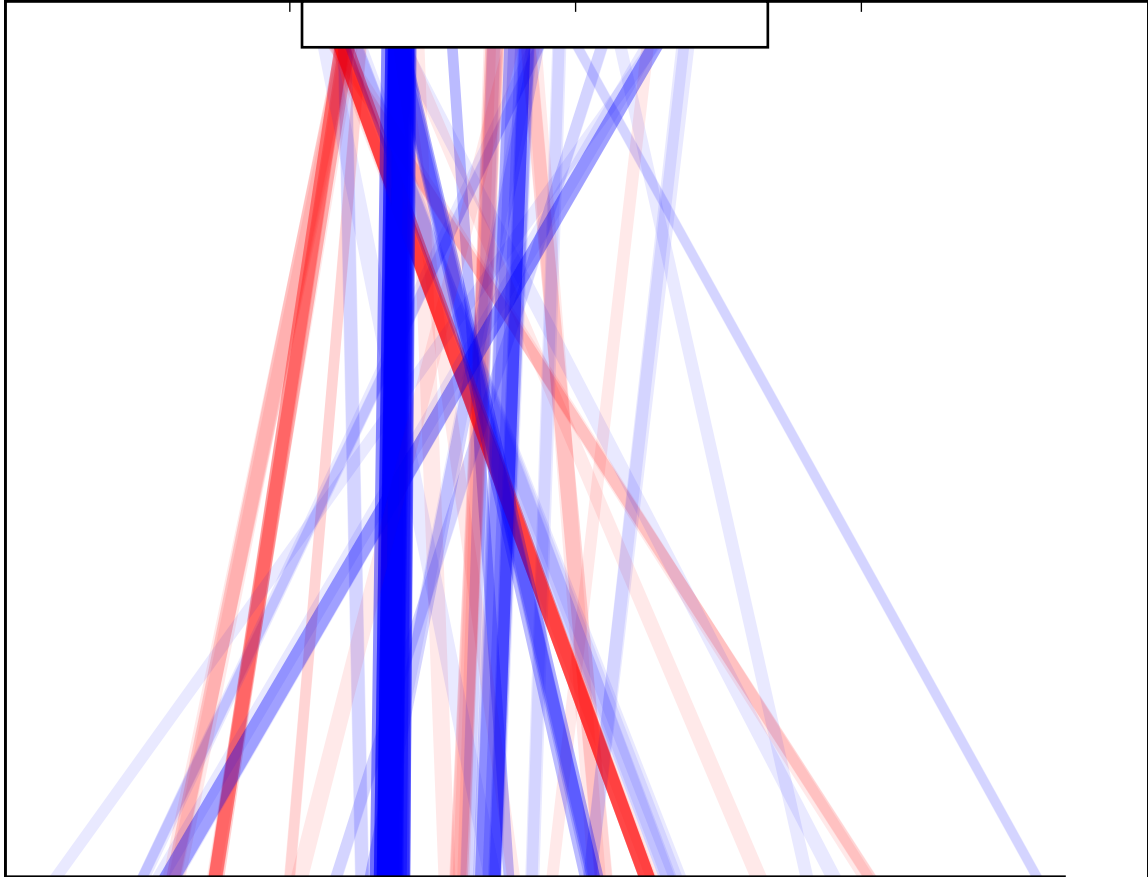

0

500

1000

1500

2000

MHE\_dmel\_dpse\_14-0.60-0.50.pdf

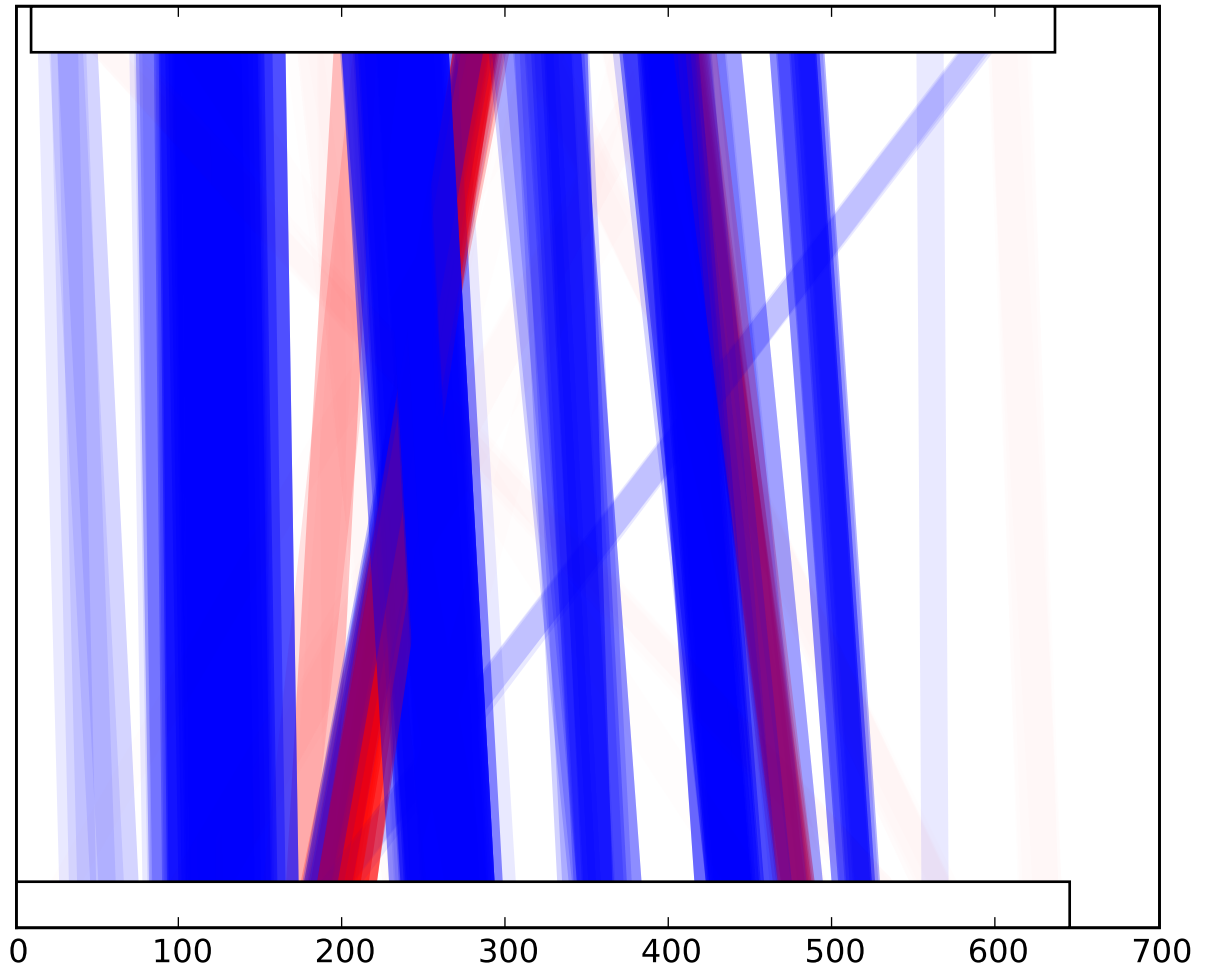

MHE\_dmel\_dvir\_14-0.60-0.50.pdf

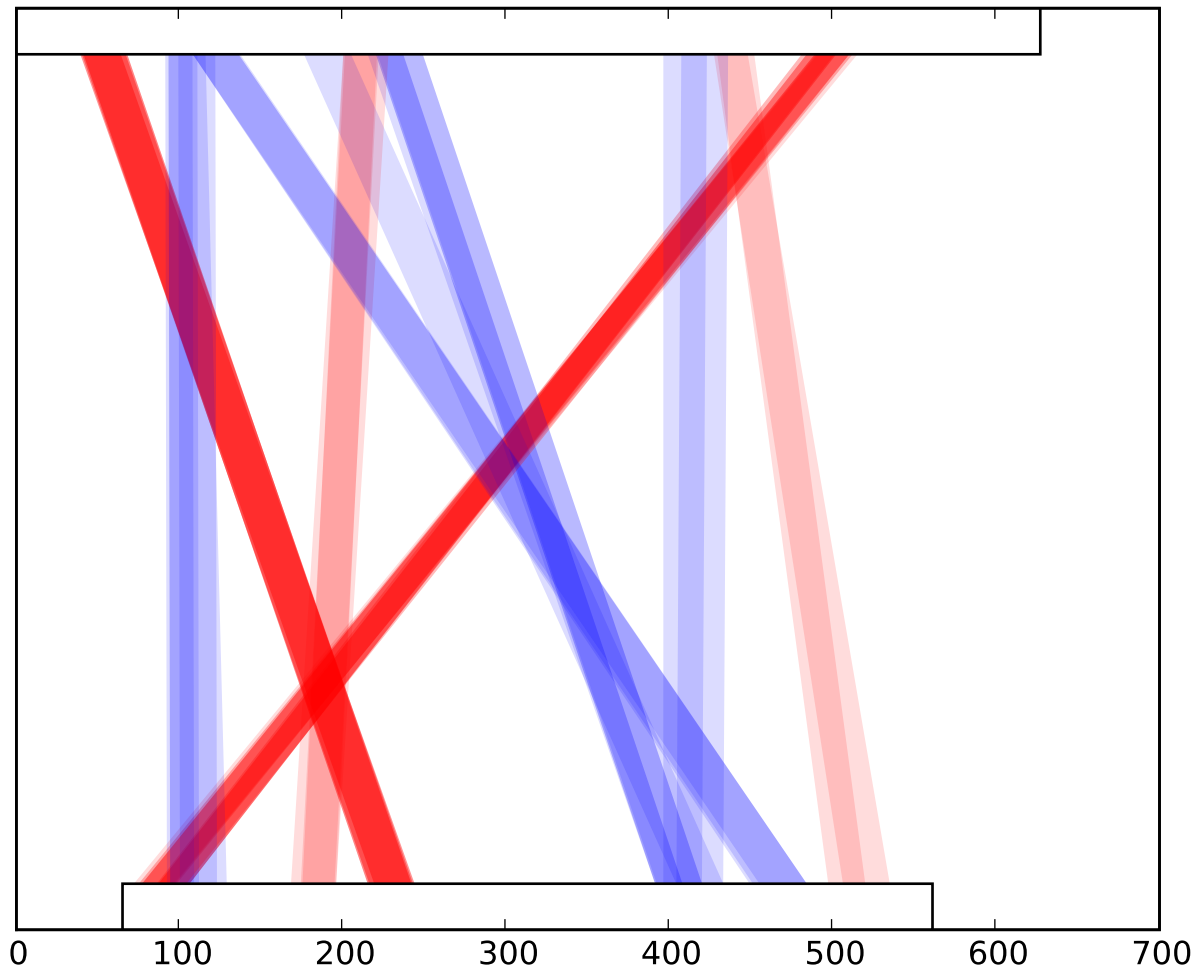

MHE\_dmel\_sepsis\_cynipsea\_14-0.60-0.50.pdf

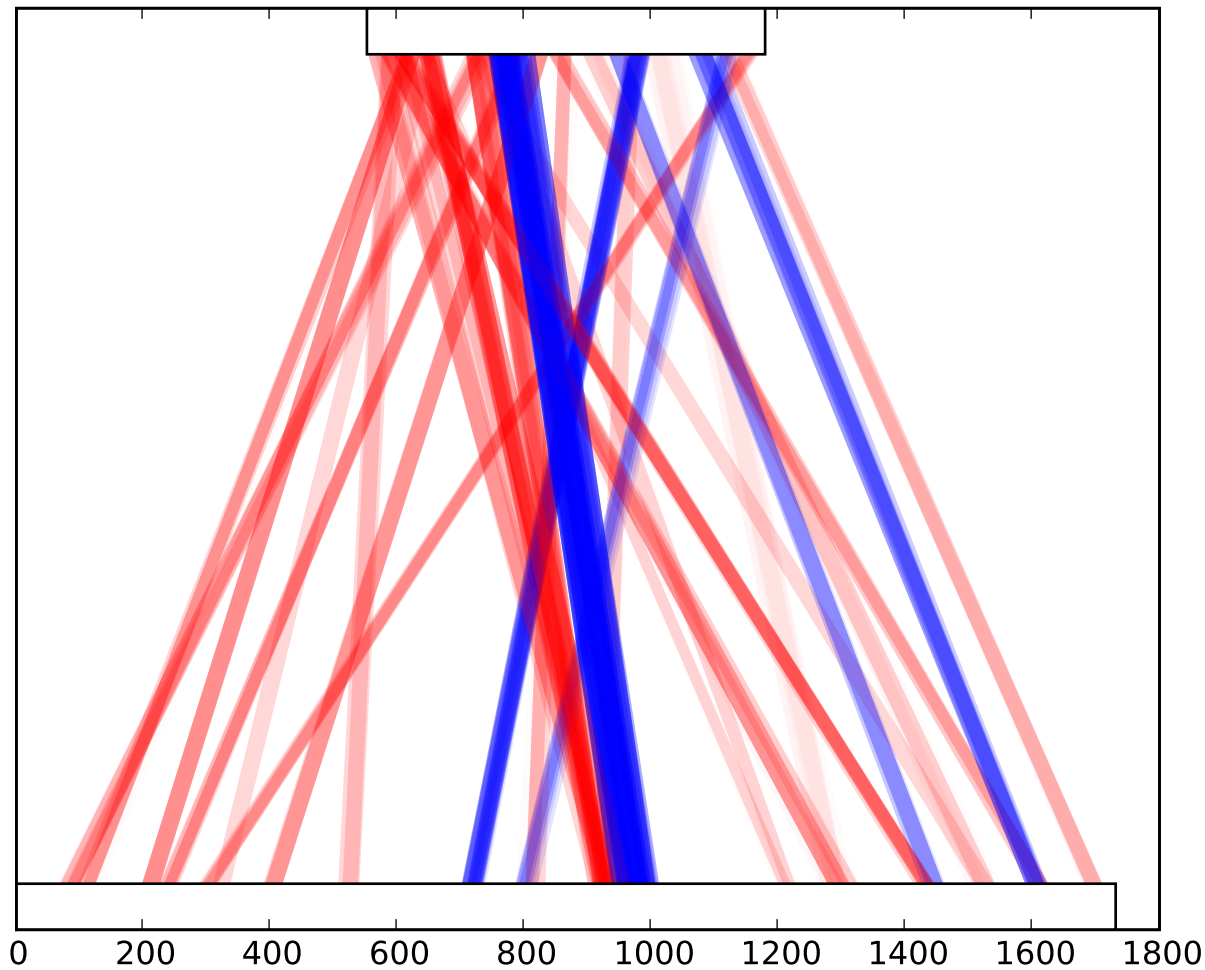

MHE\_dmel\_themira\_putris\_14-0.60-0.50.pdf

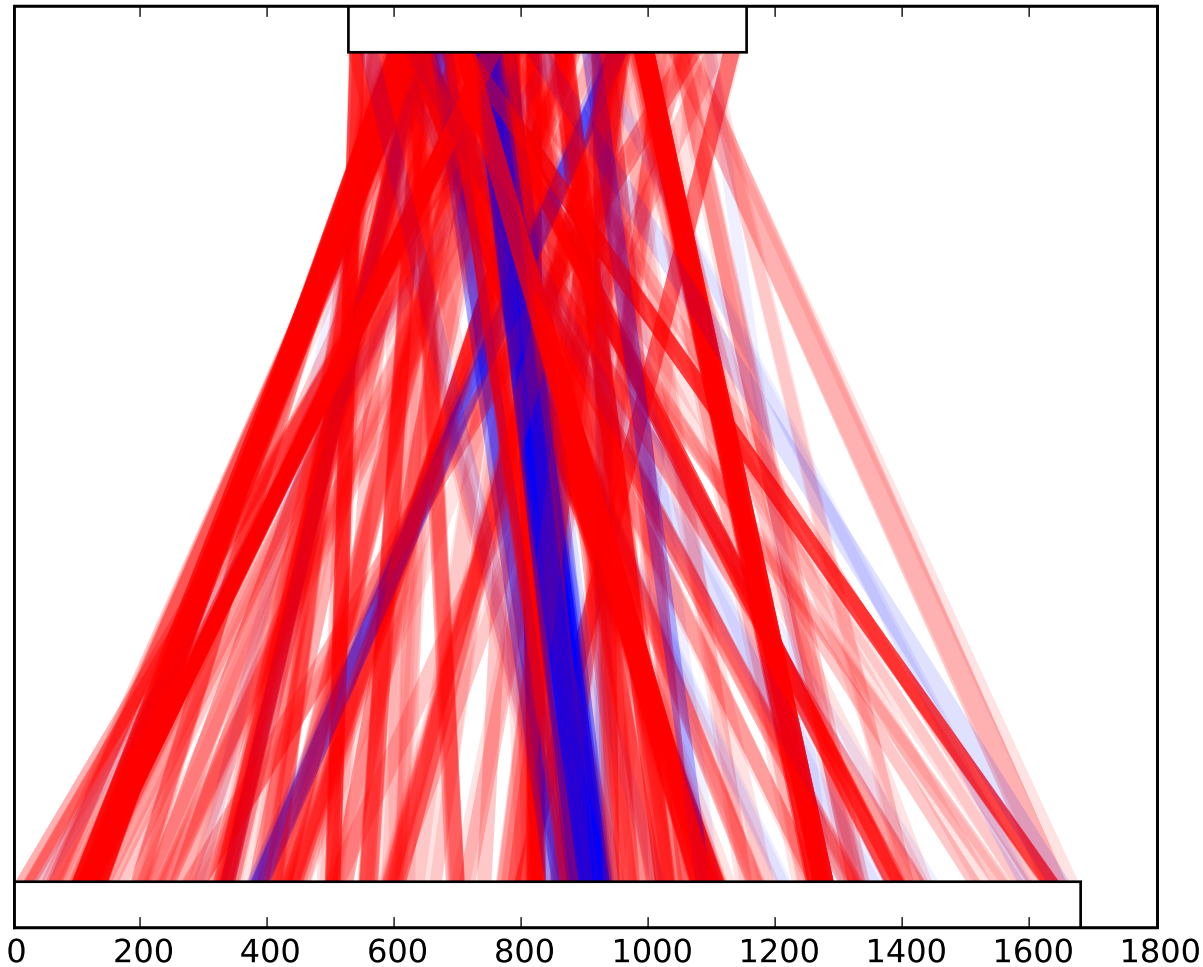



st2\_dmel\_dpse\_14-0.60-0.60.pdf

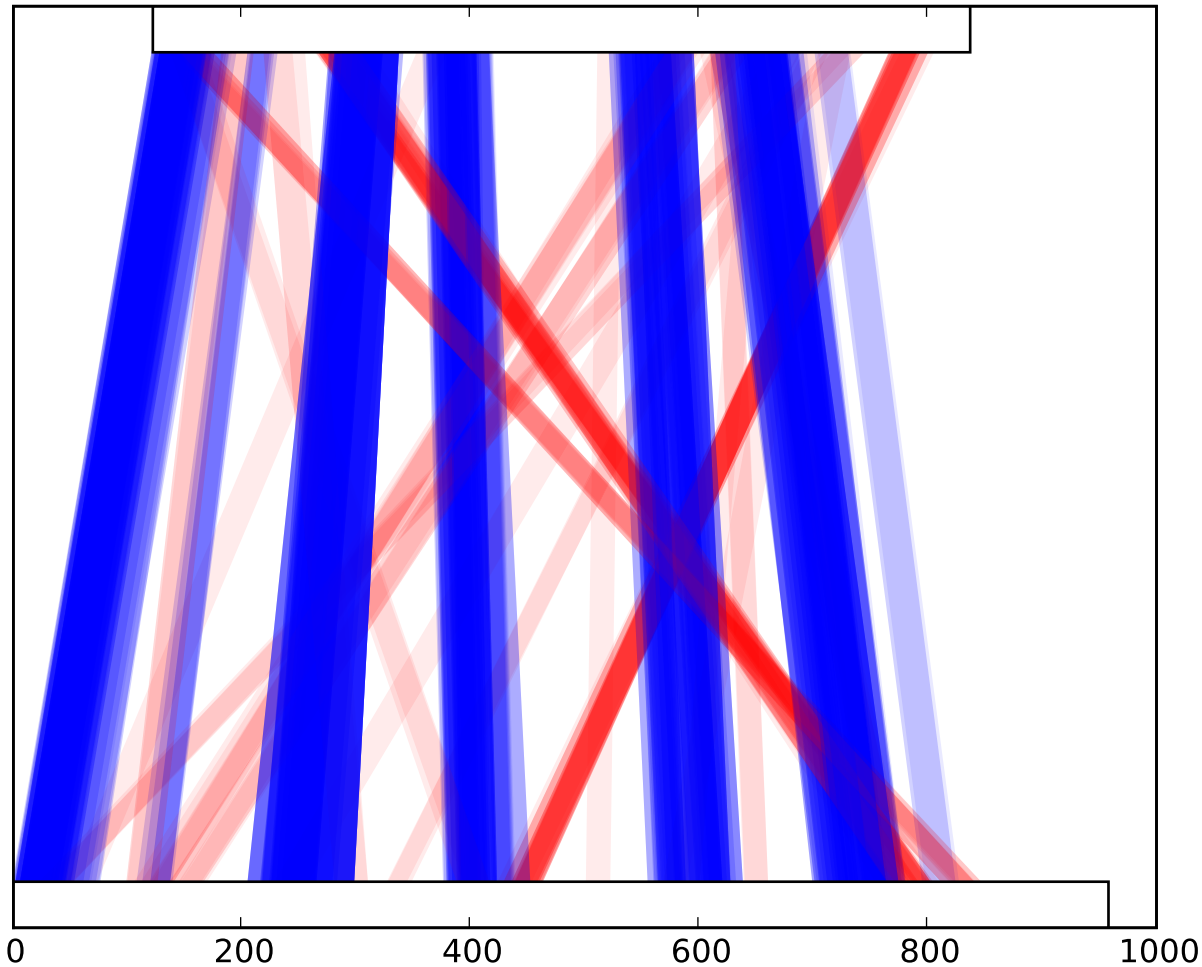

st2\_dmel\_dvir\_14-0.60-0.60.pdf

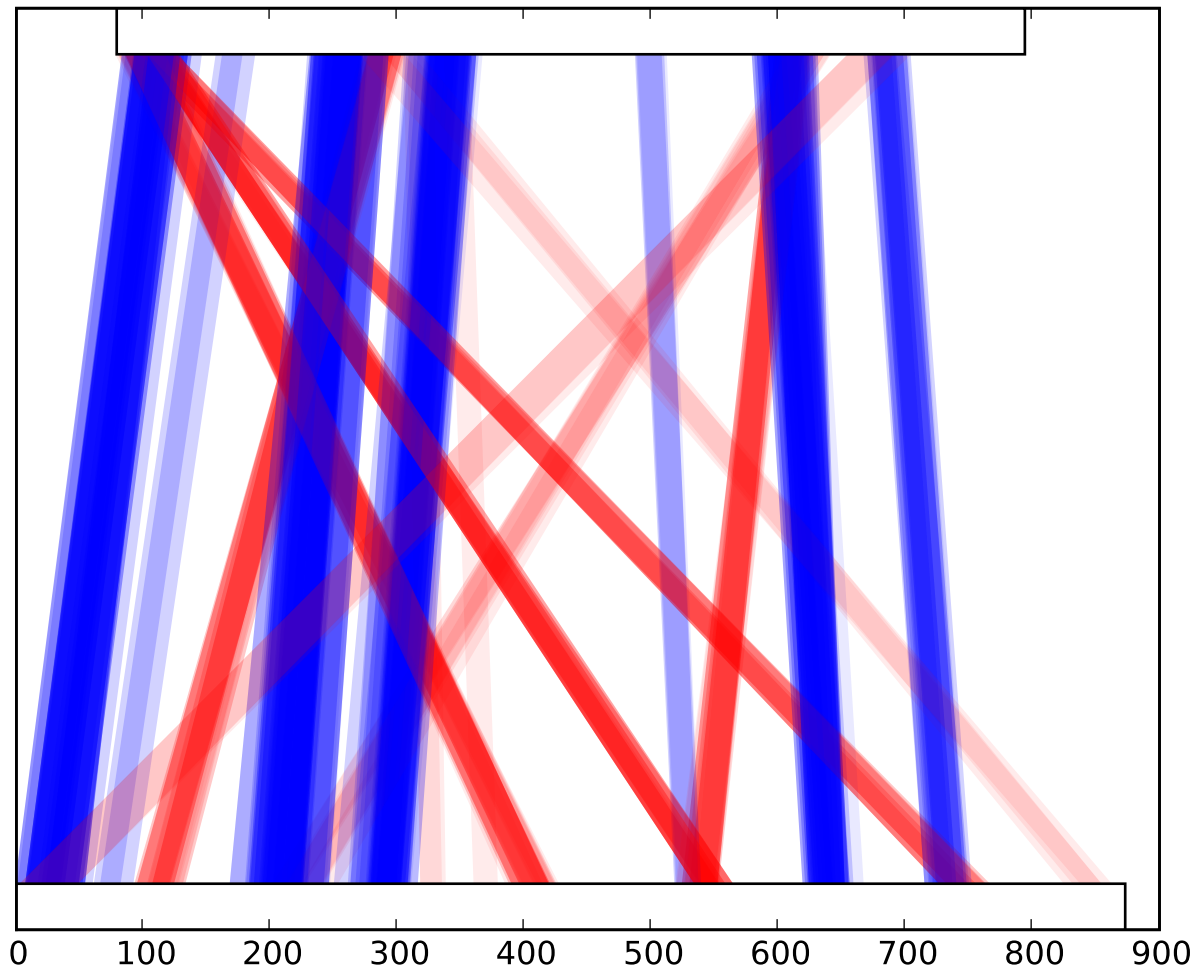

st2\_dmel\_sepsis\_cynipsea\_14-0.60-0.60.pdf

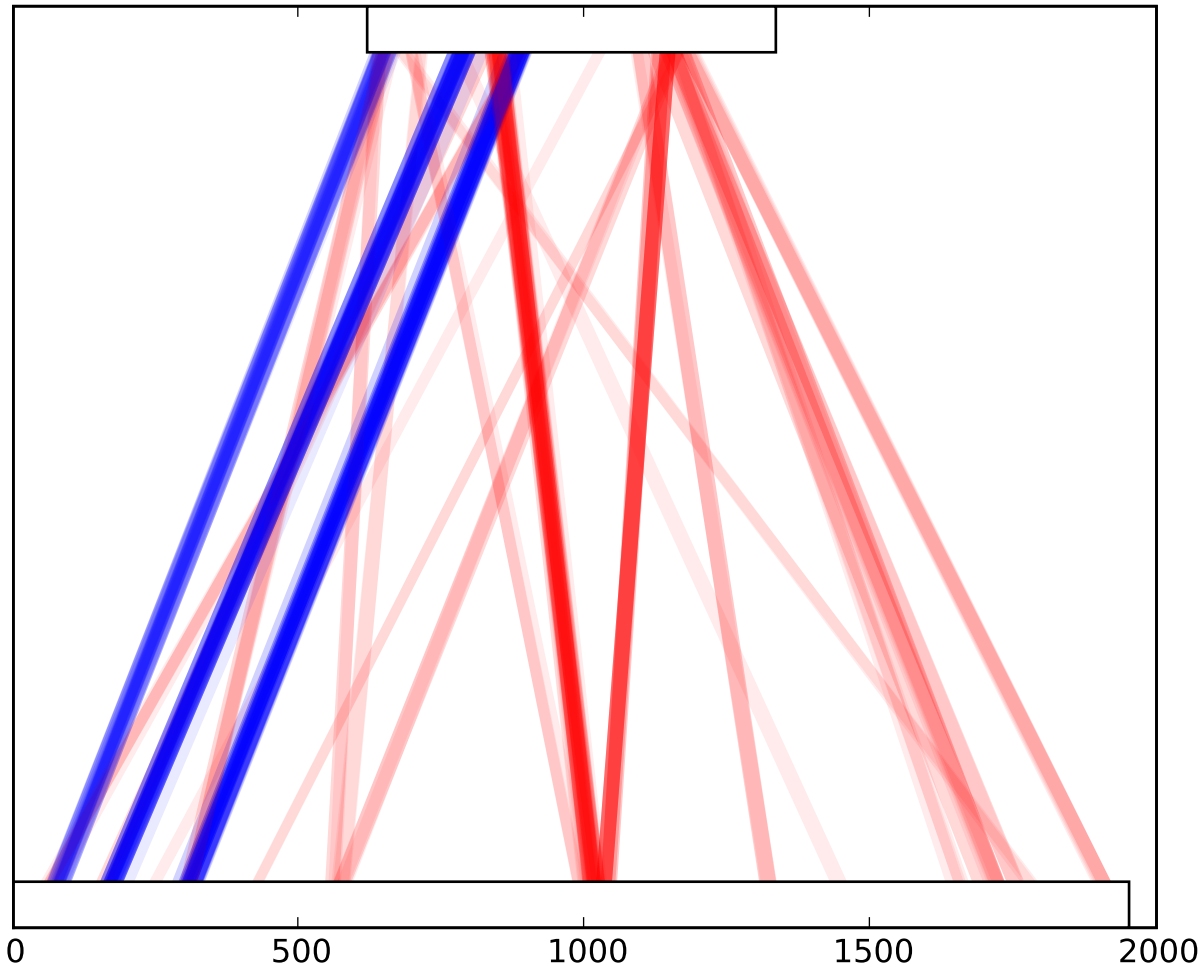

st2\_dmel\_themira\_putris\_14-0.60-0.60.pdf

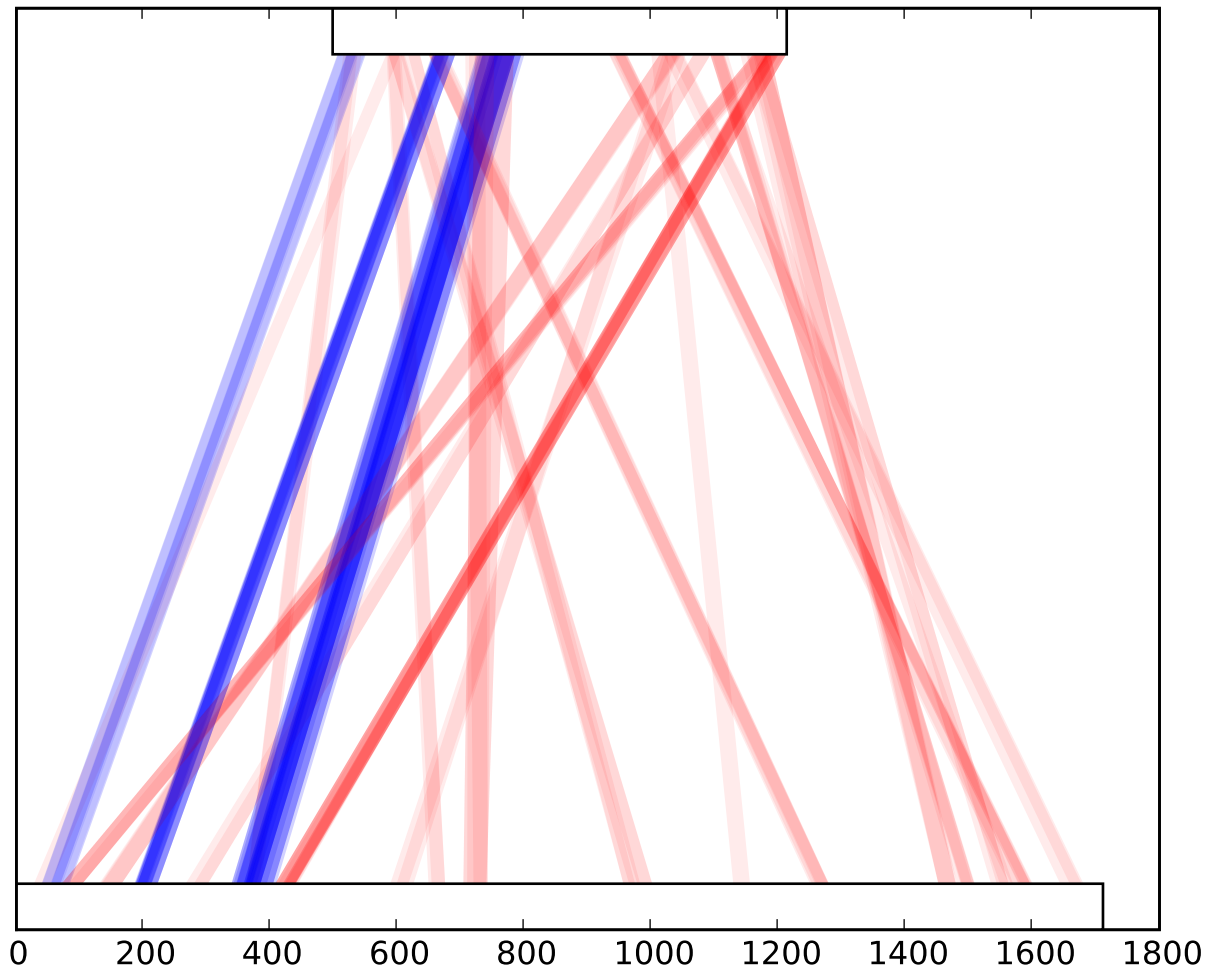

st37\_dmel\_dpse\_14-0.60-0.60.pdf

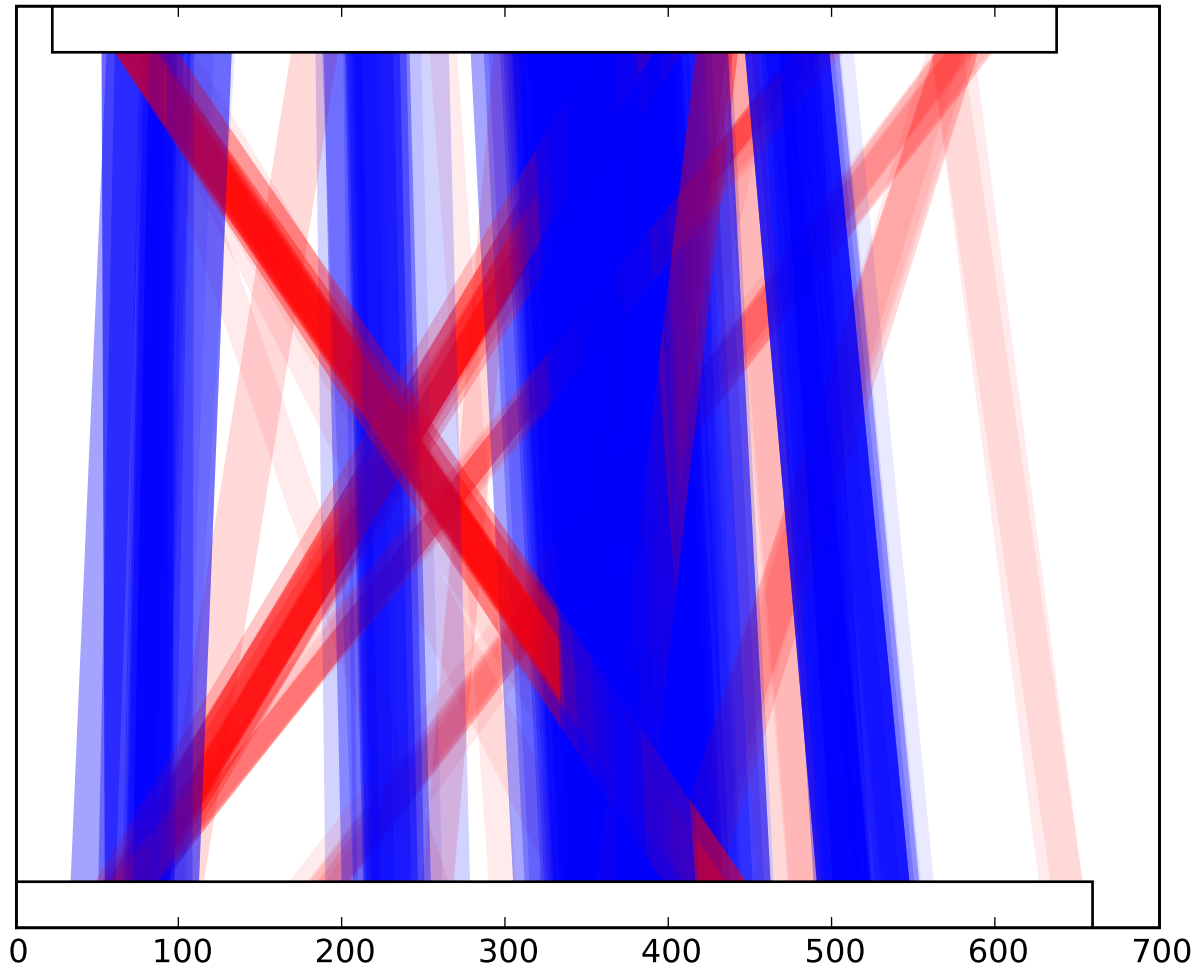

st37\_dmel\_dvir\_14-0.60-0.60.pdf

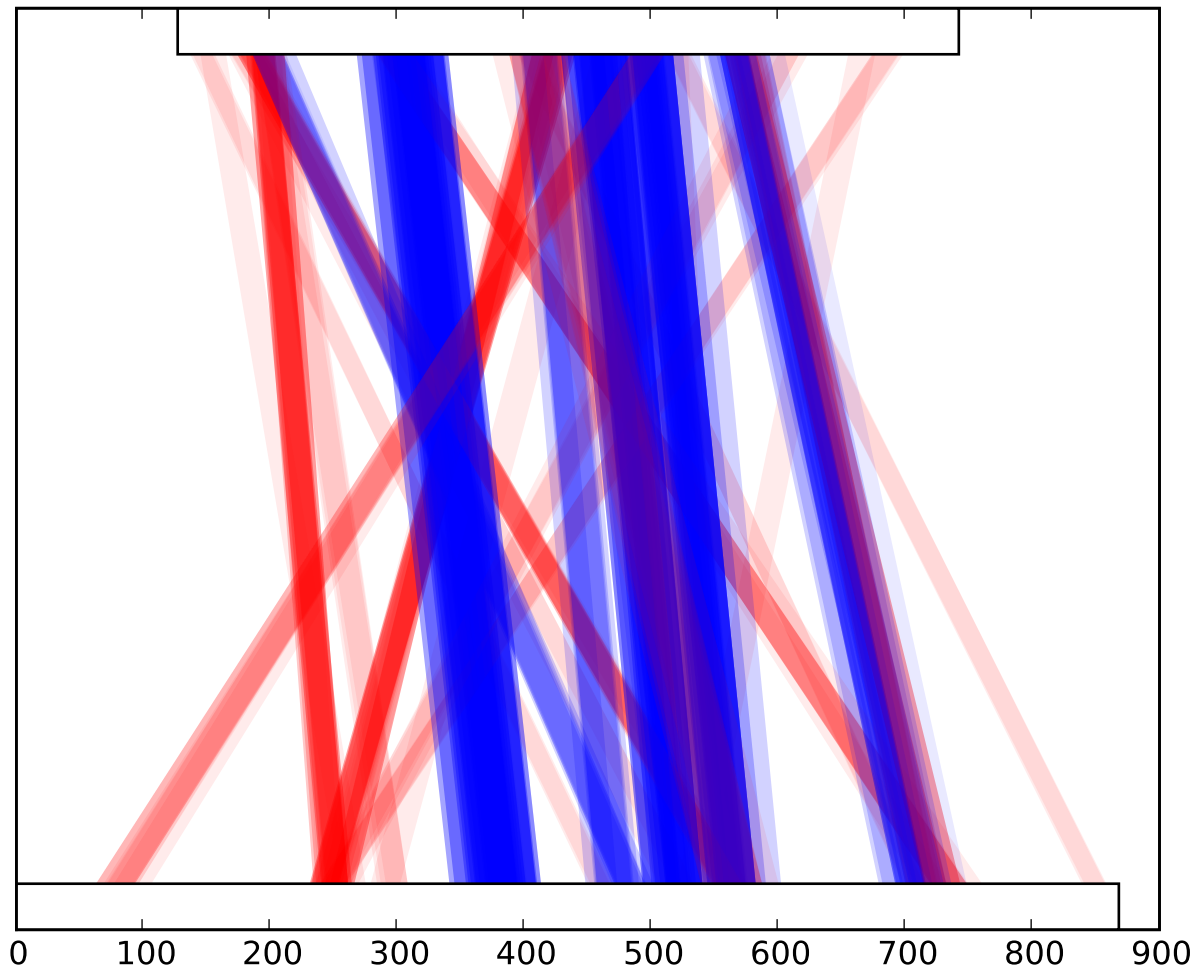

st37\_dmel\_sepsis\_cynipsea\_14-0.60-0.60.pdf

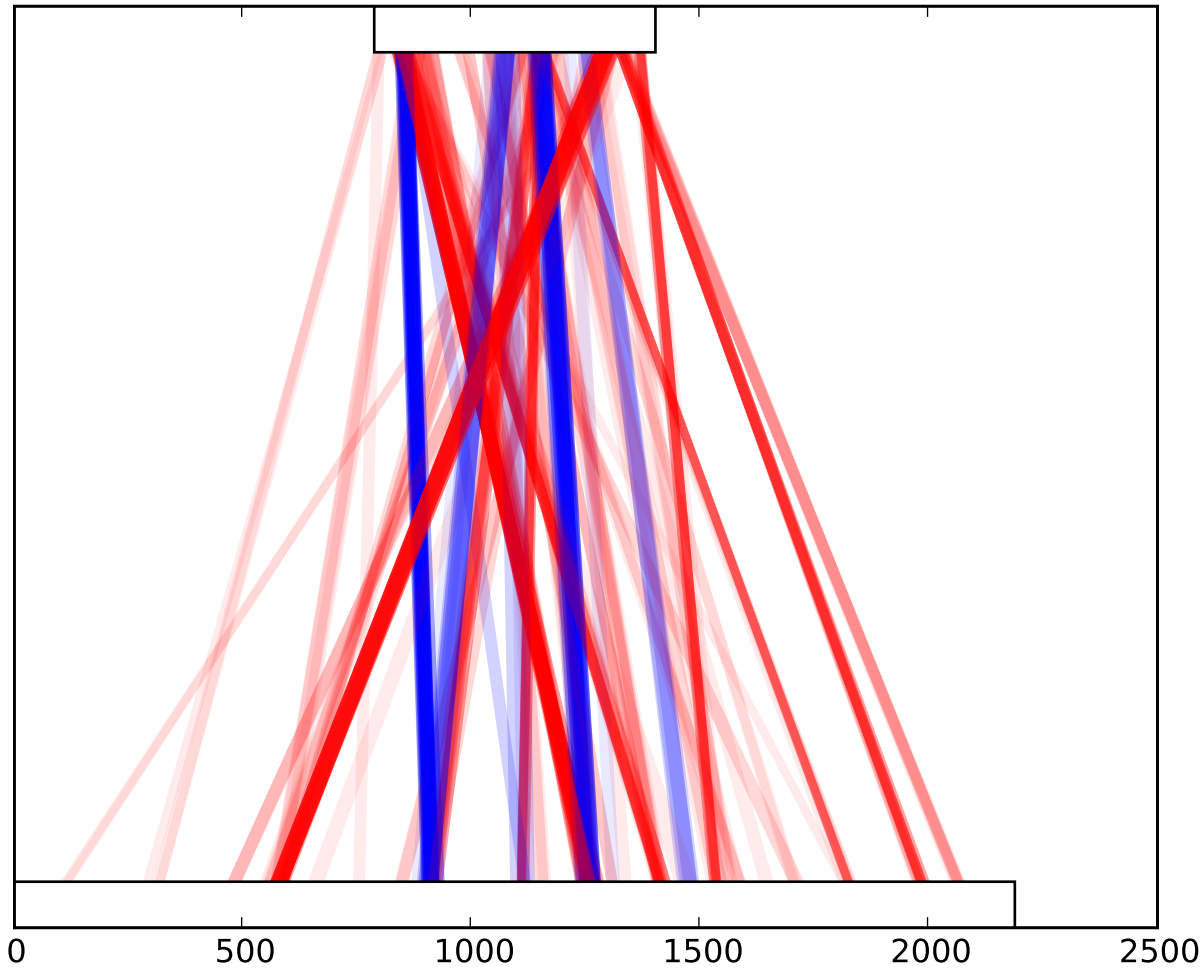

st37\_dmel\_themira\_putris\_14-0.60-0.60.pdf

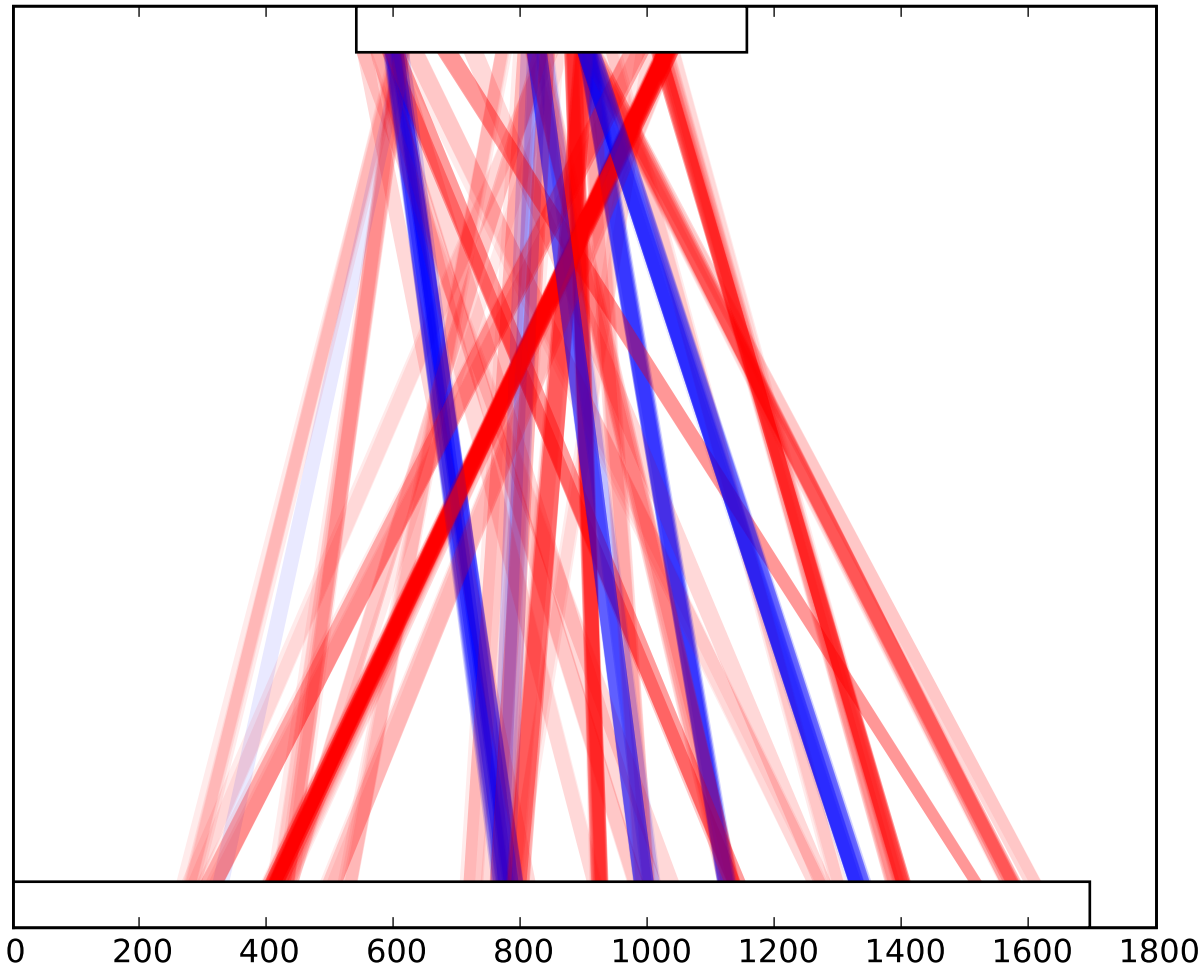



st46\_dmel\_dpse\_14-0.60-0.60.pdf

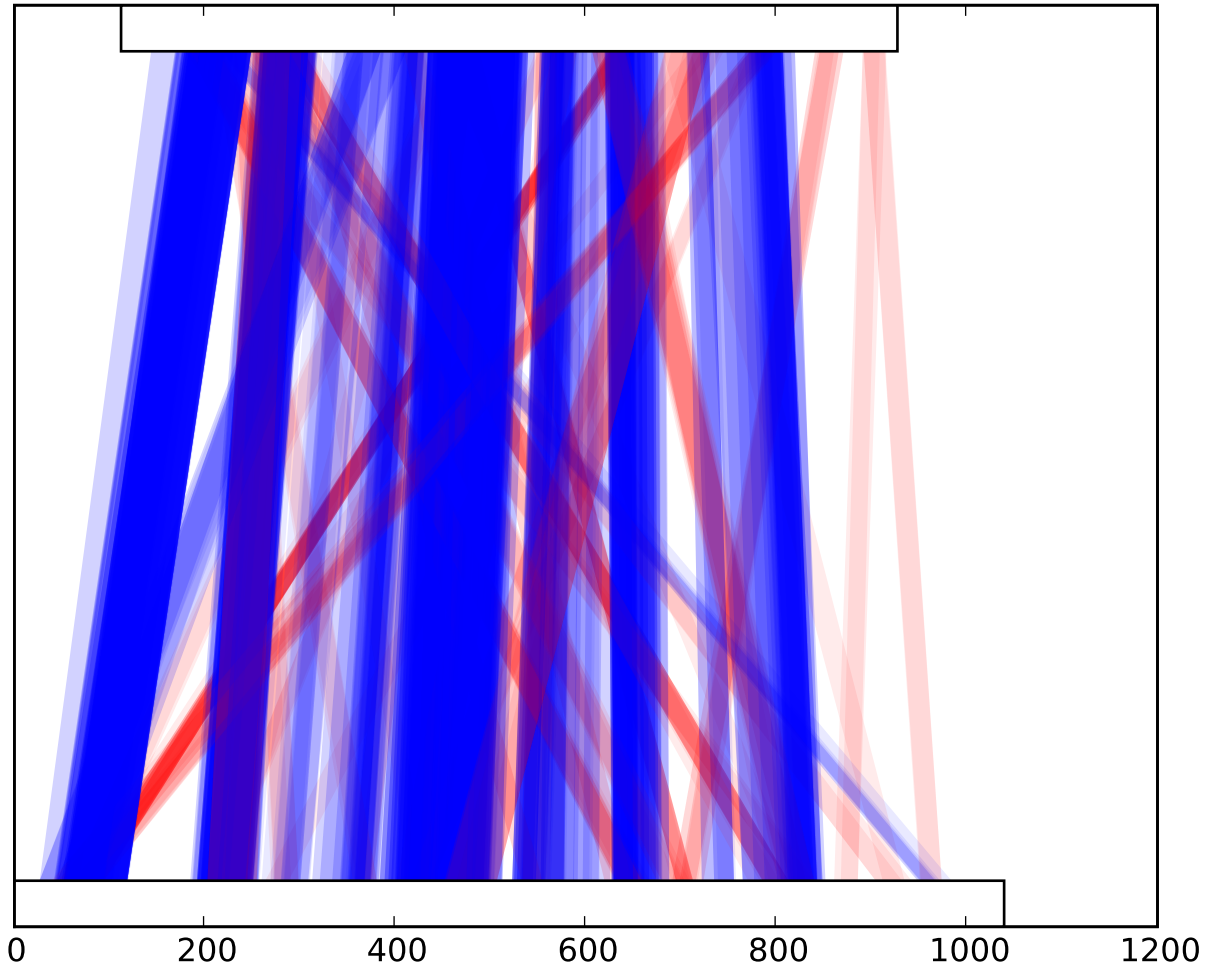

st46\_dmel\_dvir\_14-0.60-0.60.pdf

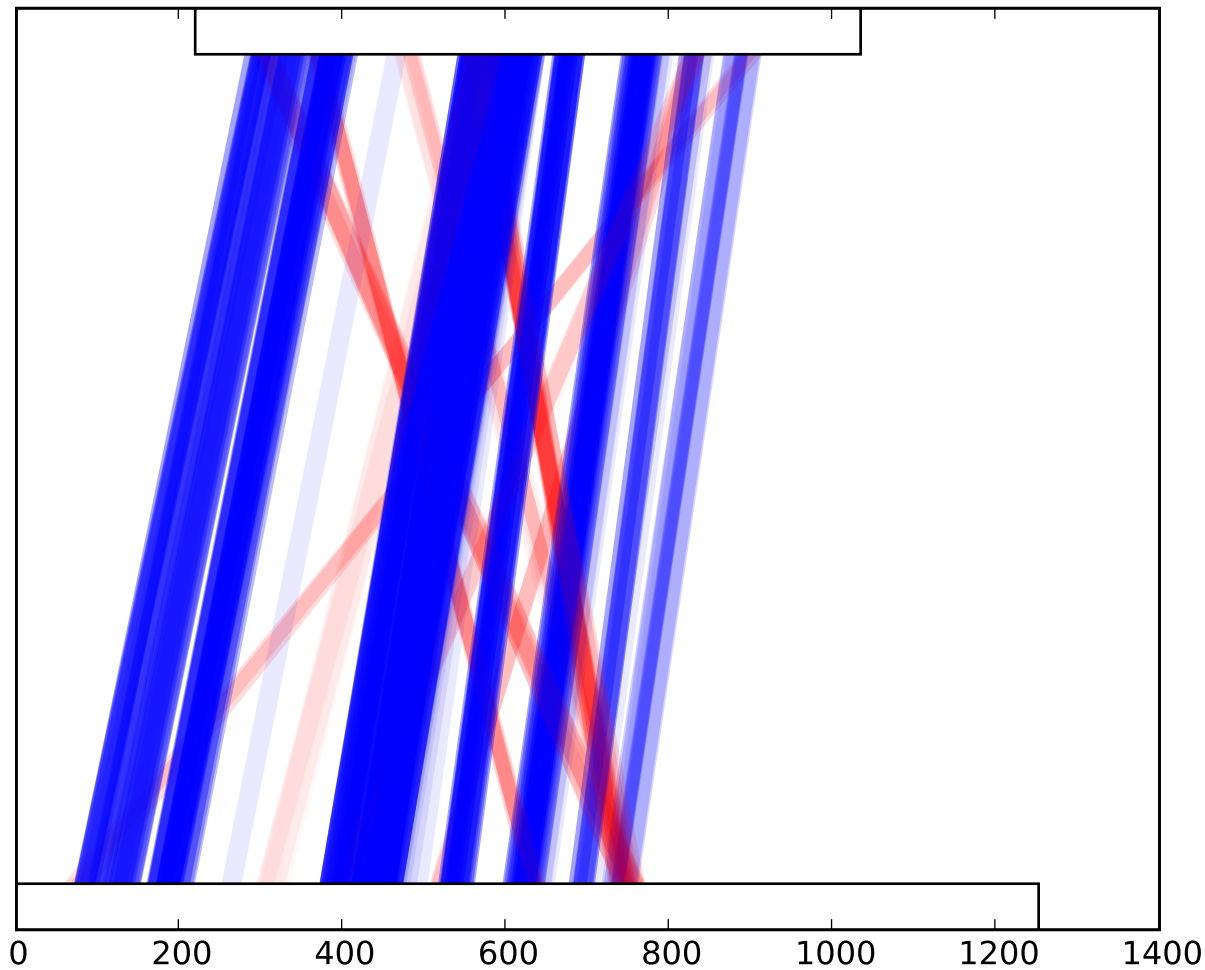

st46\_dmel\_sepsis\_cynipsea\_14-0.60-0.60.pdf

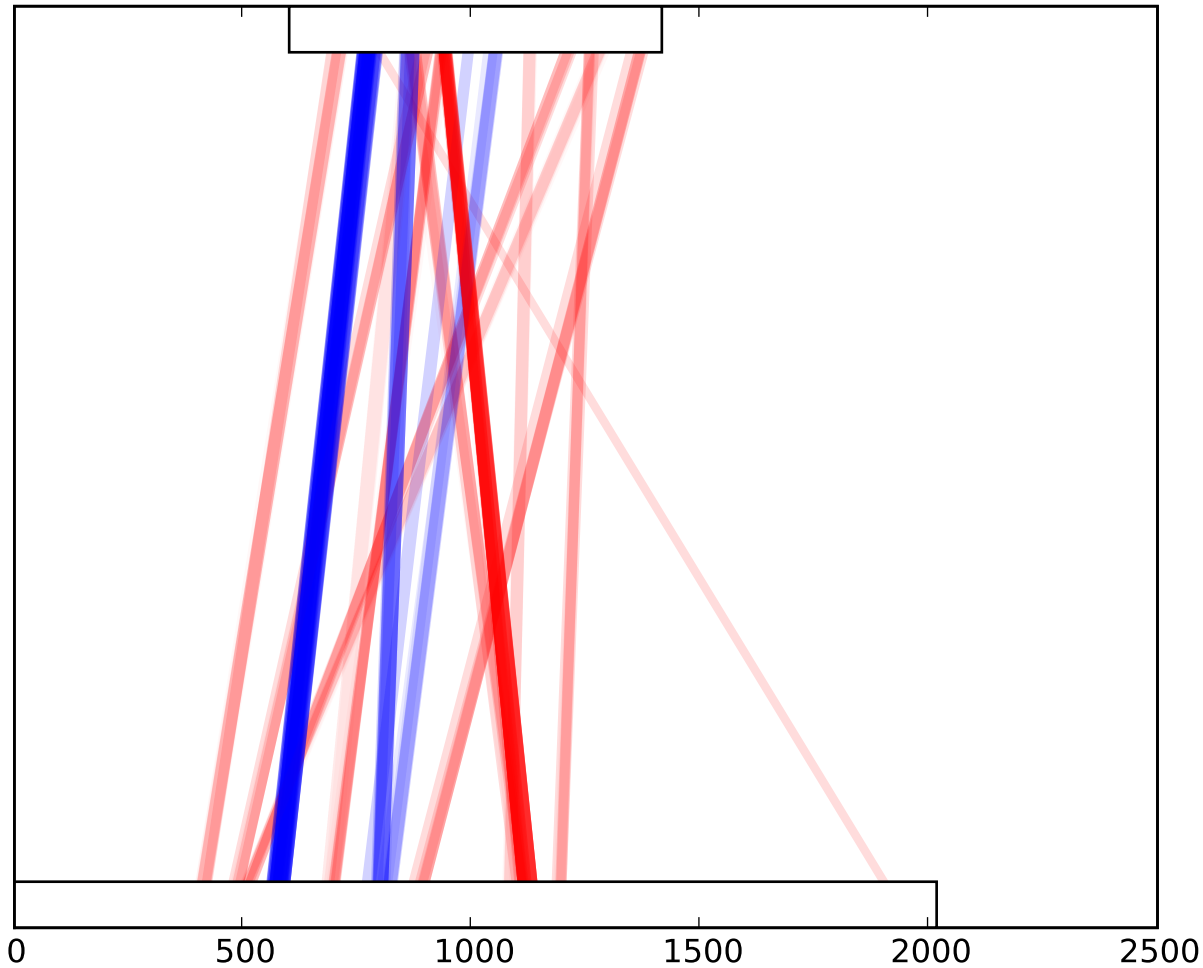

st46\_dmel\_themira\_putris\_14-0.60-0.60.pdf

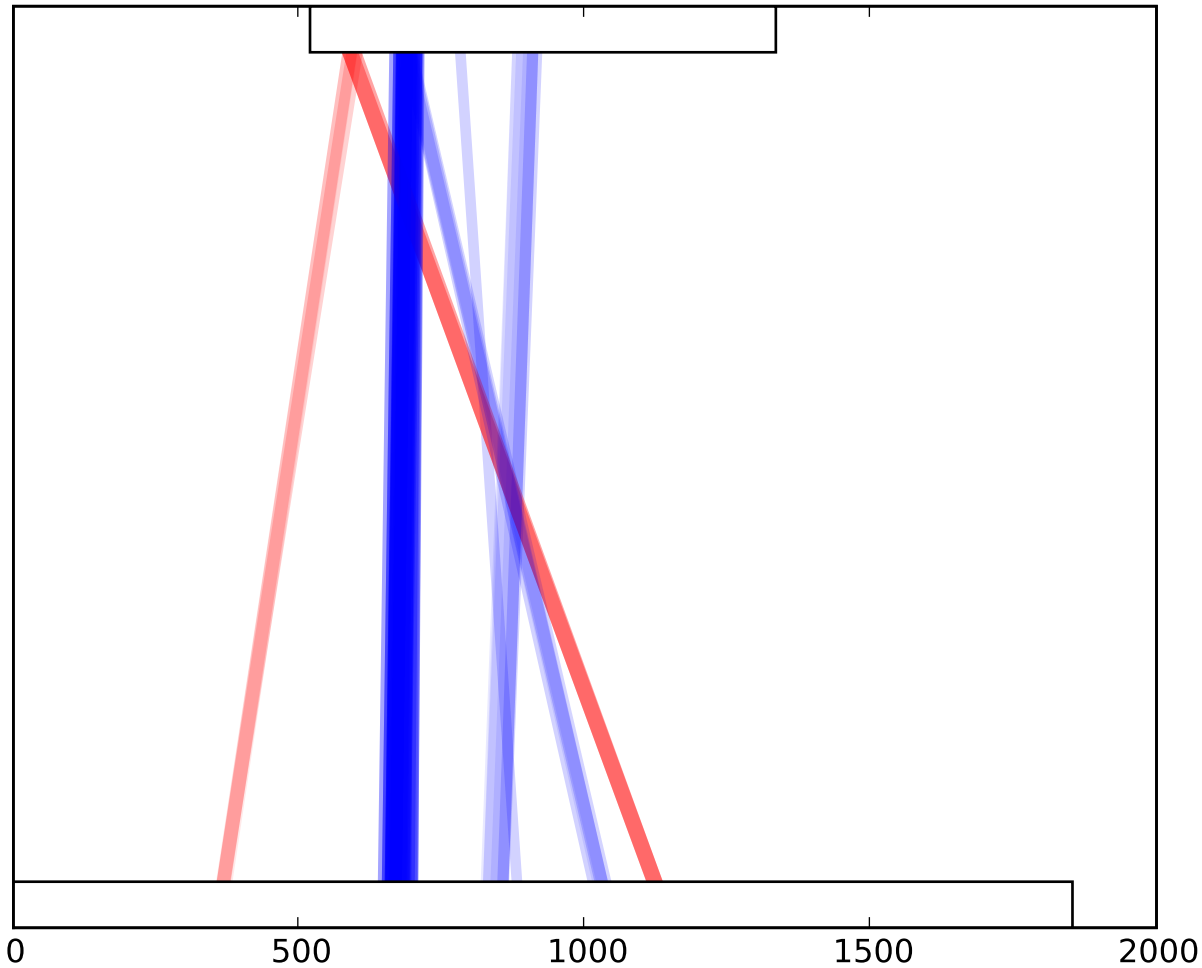

MHE\_dmel\_dpse\_14-0.60-0.60.pdf

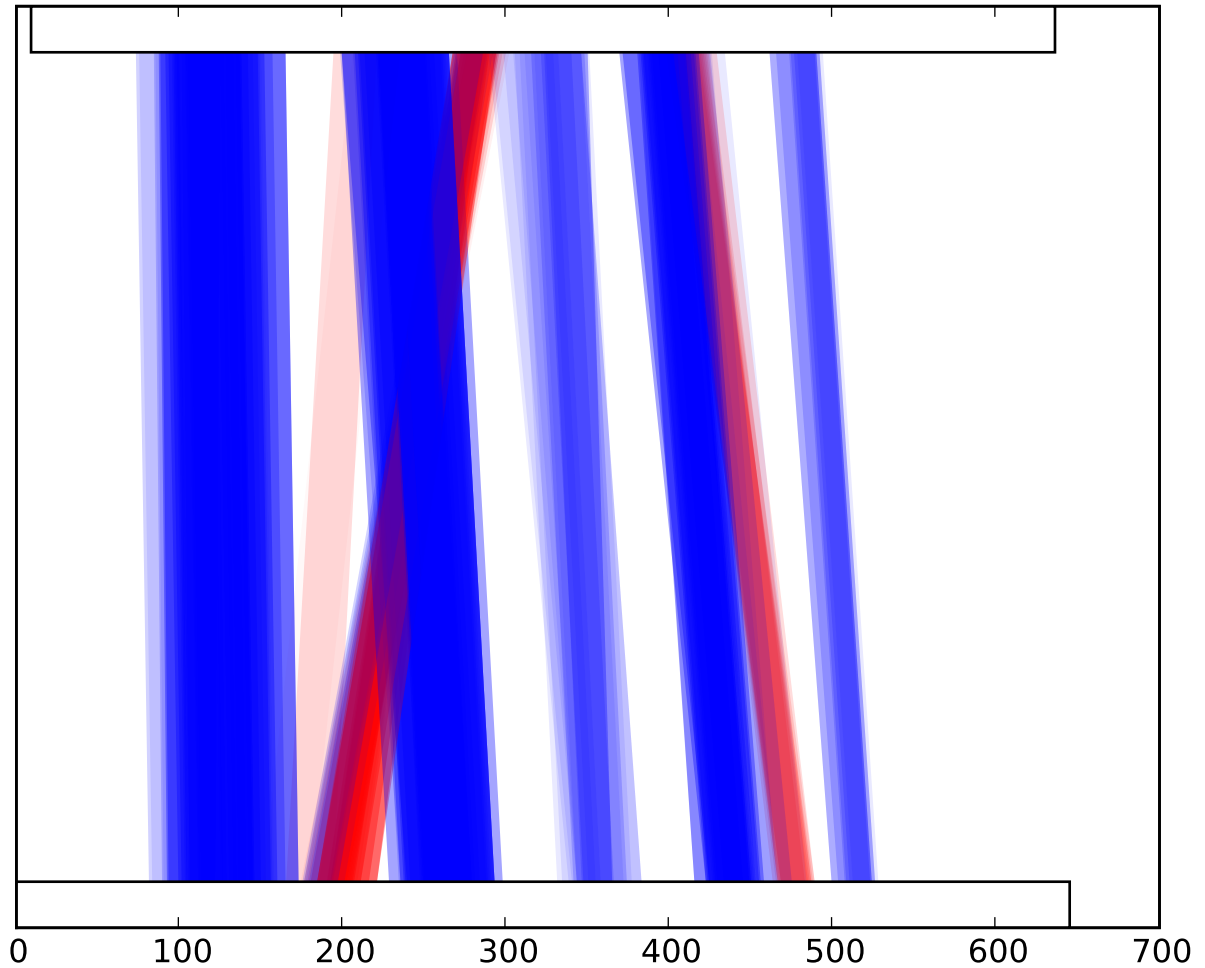

MHE\_dmel\_dvir\_14-0.60-0.60.pdf

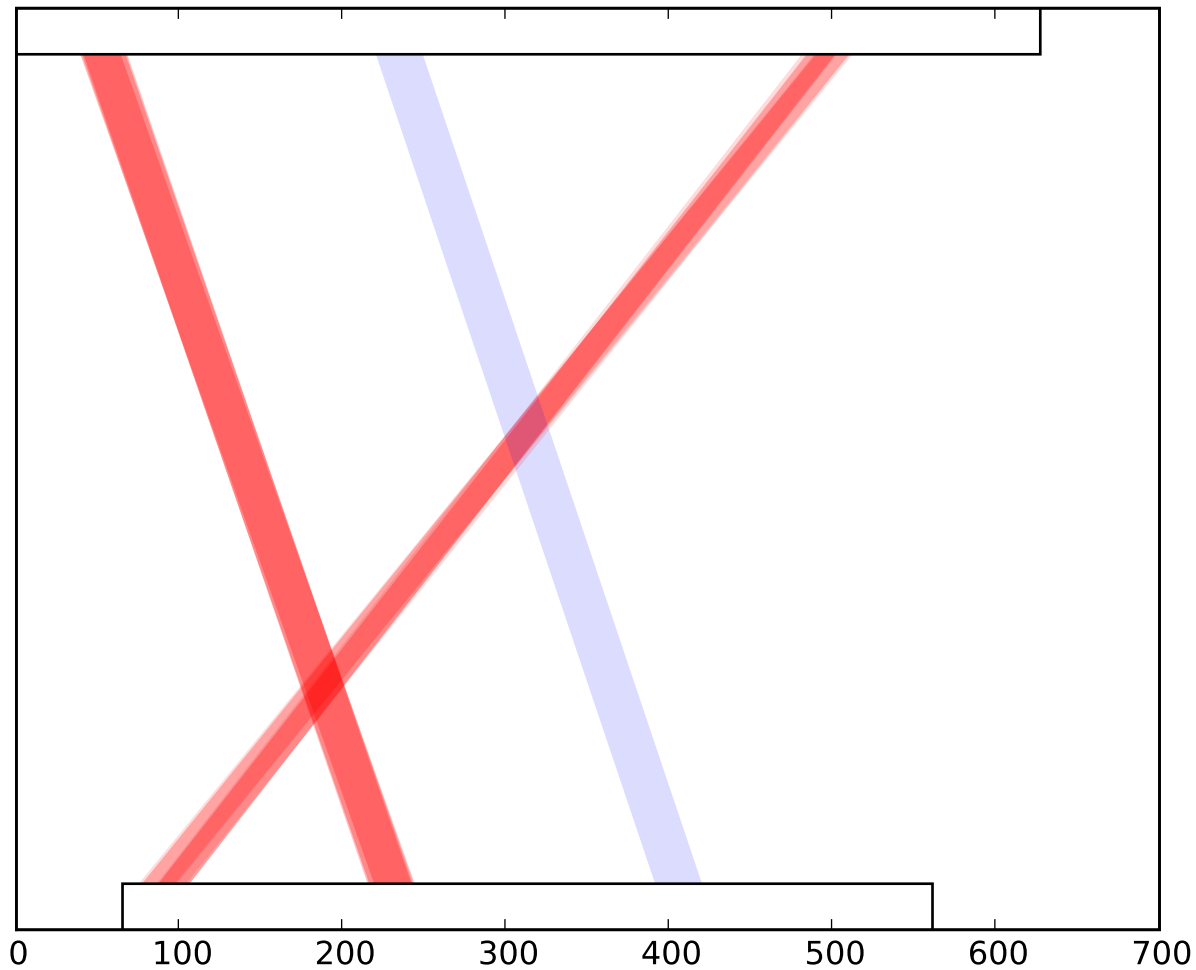

MHE\_dmel\_sepsis\_cynipsea\_14-0.60-0.60.pdf

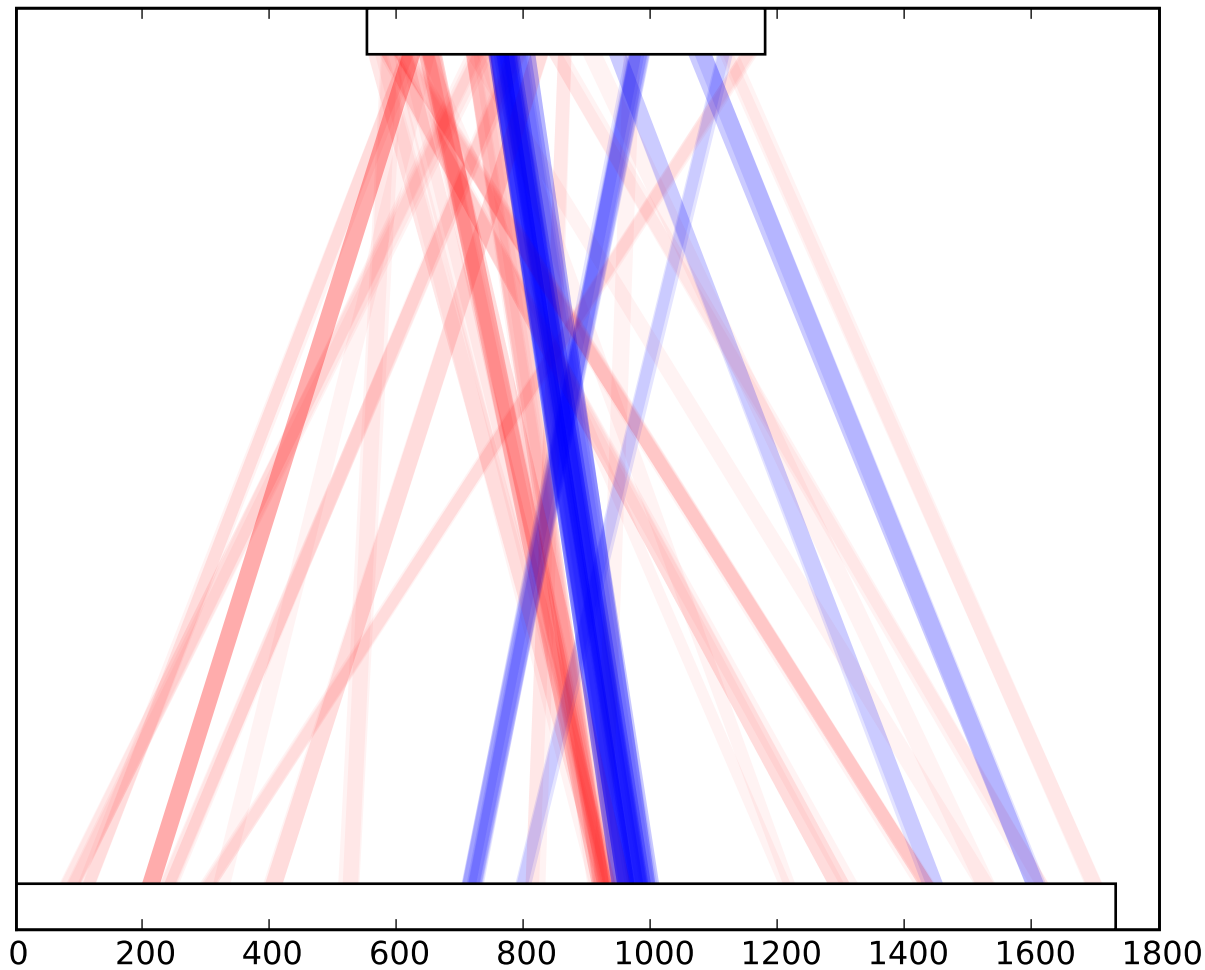

MHE\_dmel\_themira\_putris\_14-0.60-0.60.pdf

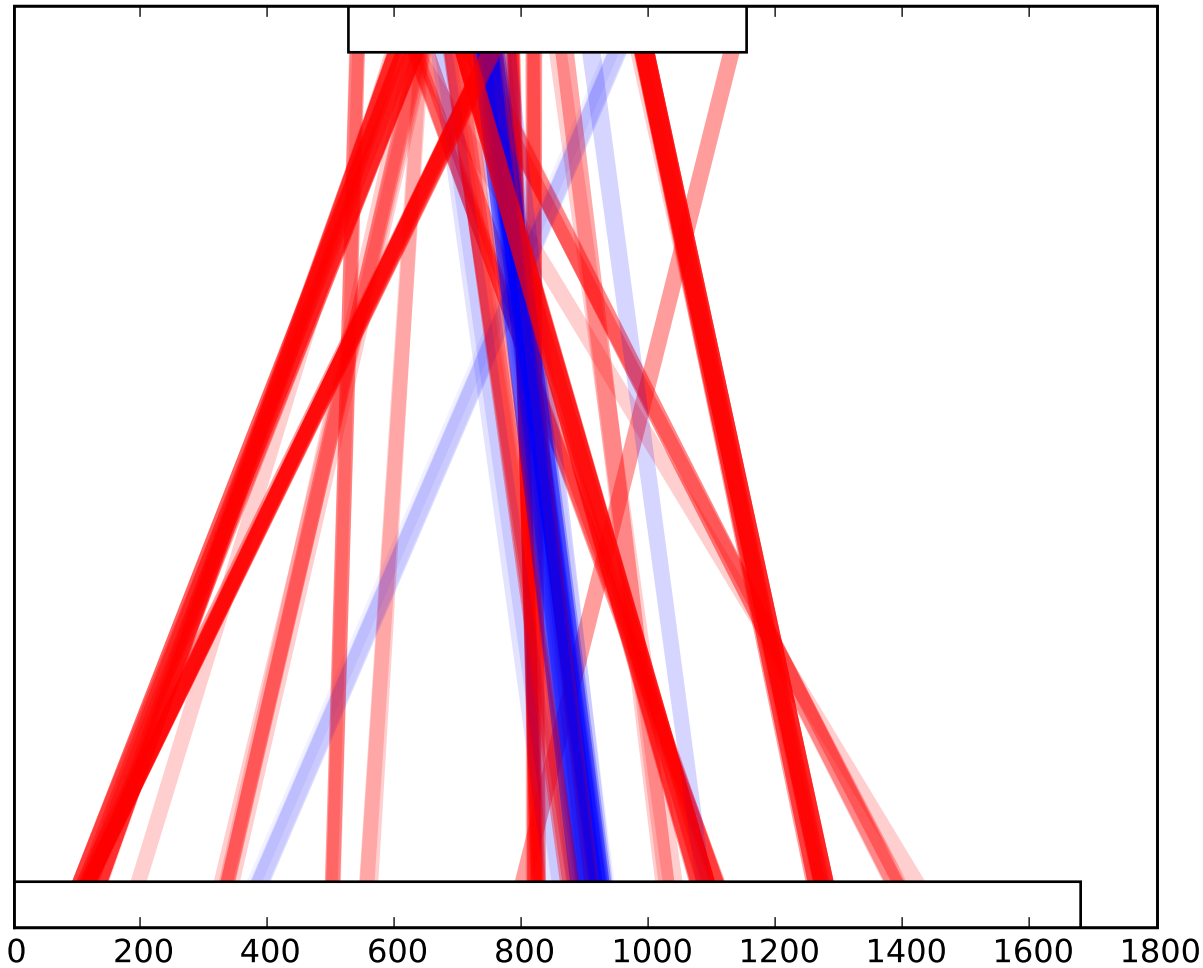



st2\_dmel\_dpse\_14-0.60-0.70.pdf

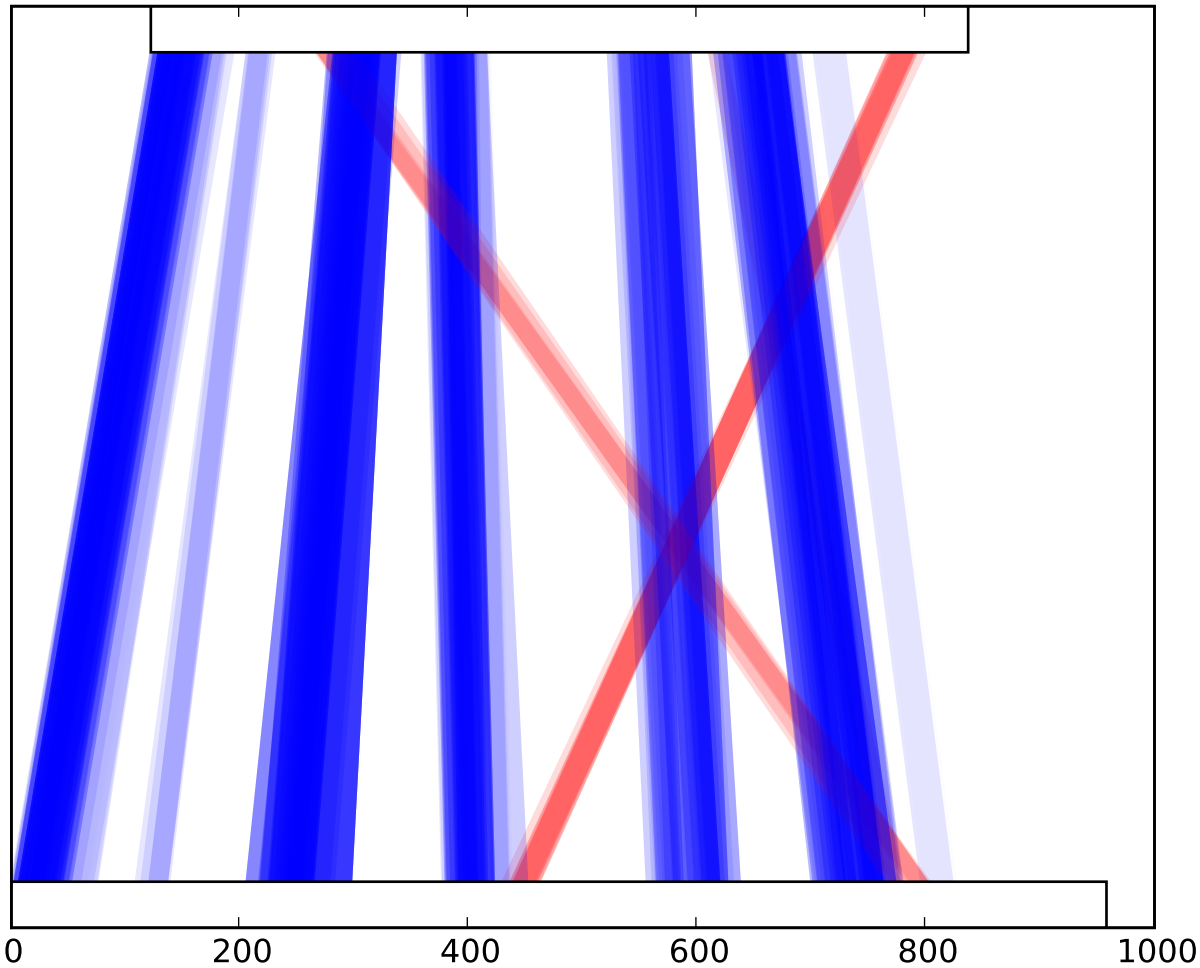

st2\_dmel\_dvir\_14-0.60-0.70.pdf

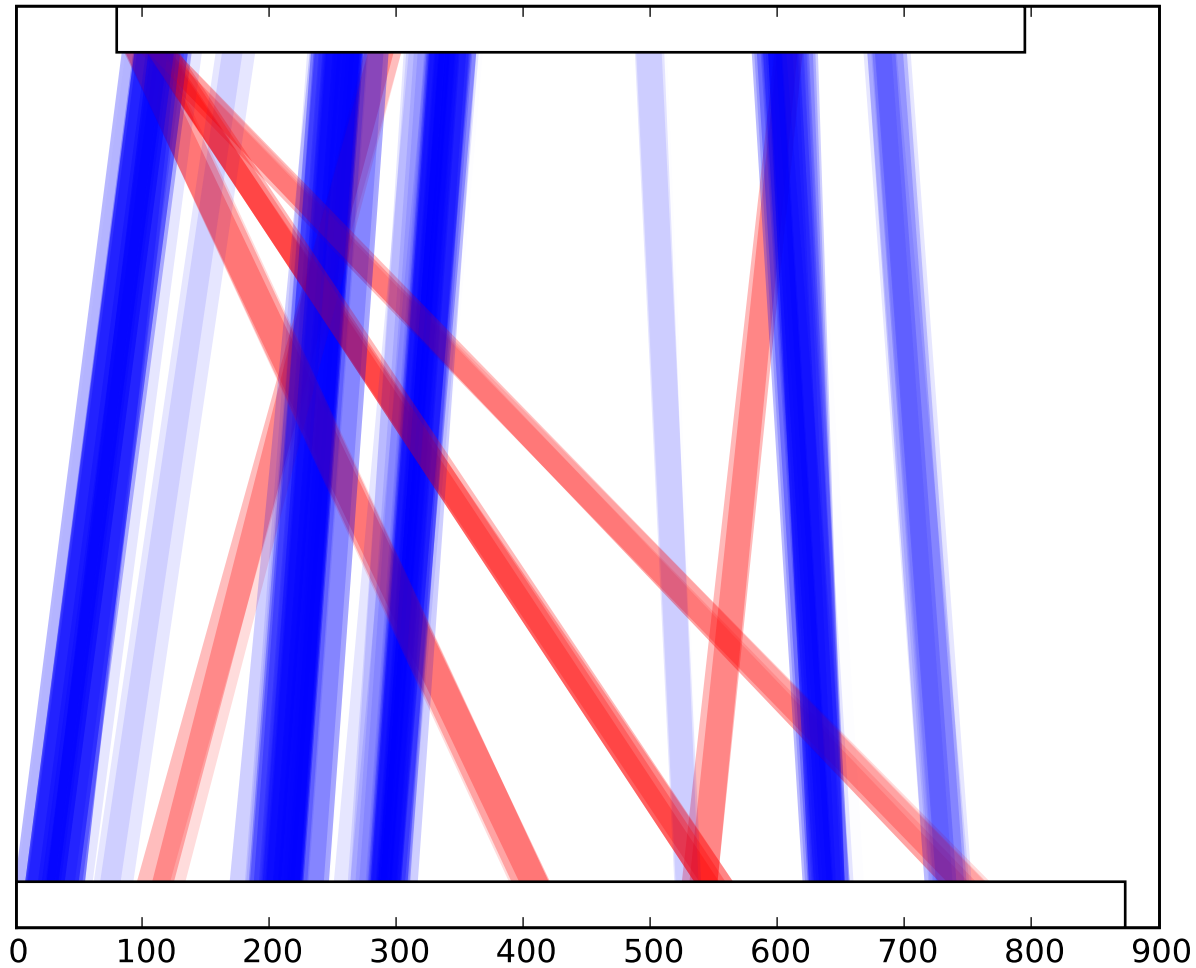

st2\_dmel\_sepsis\_cynipsea\_14-0.60-0.70.pdf

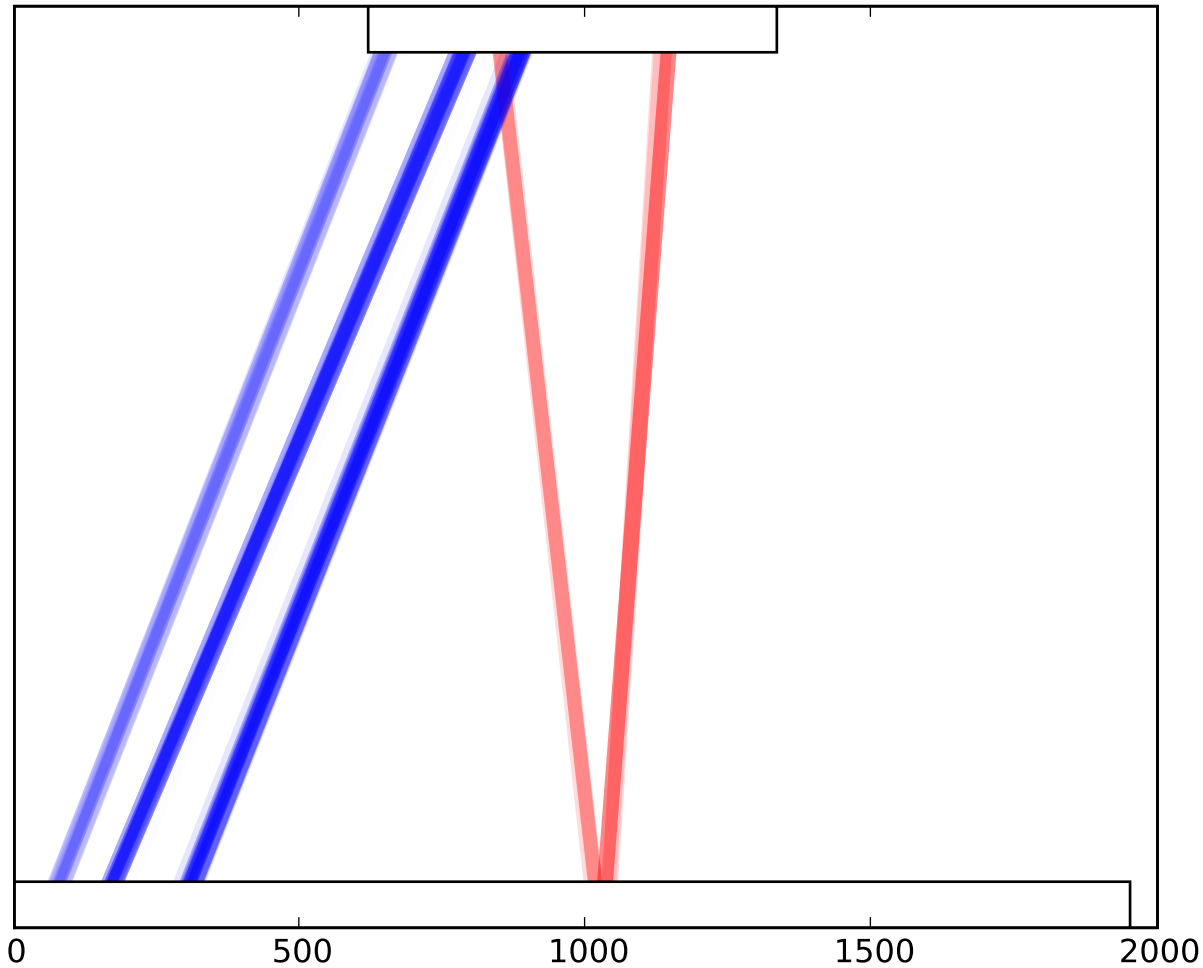

st2\_dmel\_themira\_putris\_14-0.60-0.70.pdf

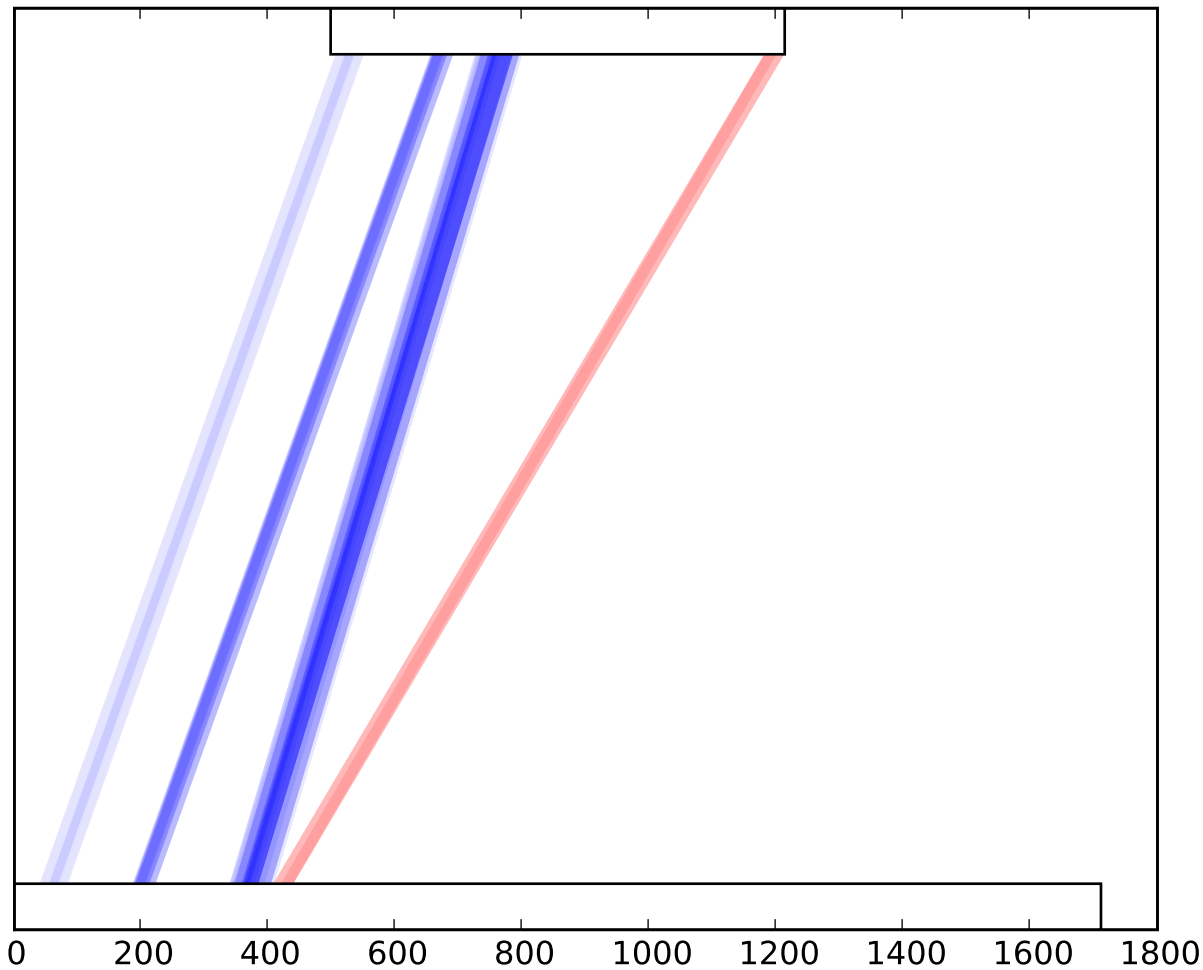

st37\_dmel\_dpse\_14-0.60-0.70.pdf

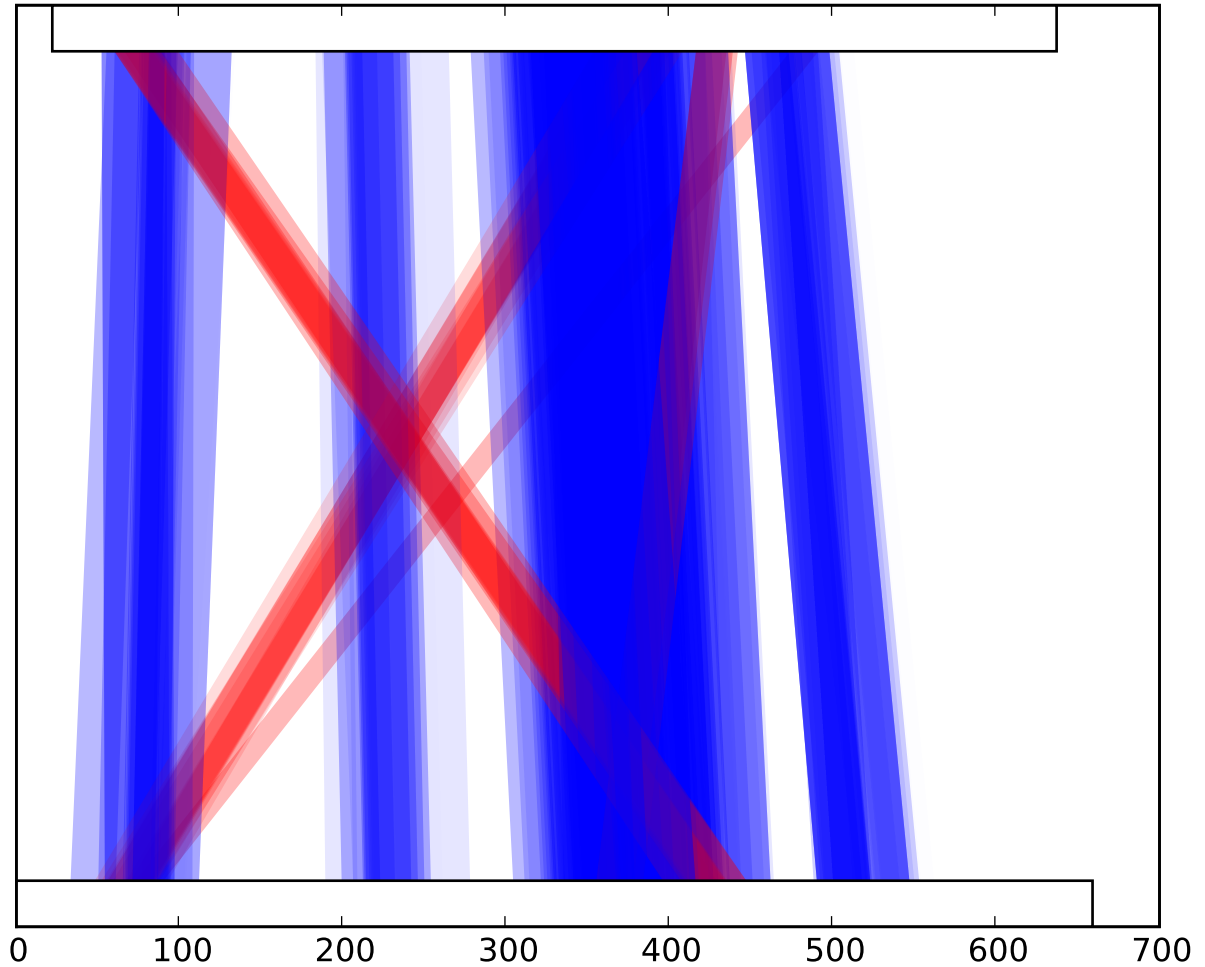

st37\_dmel\_dvir\_14-0.60-0.70.pdf

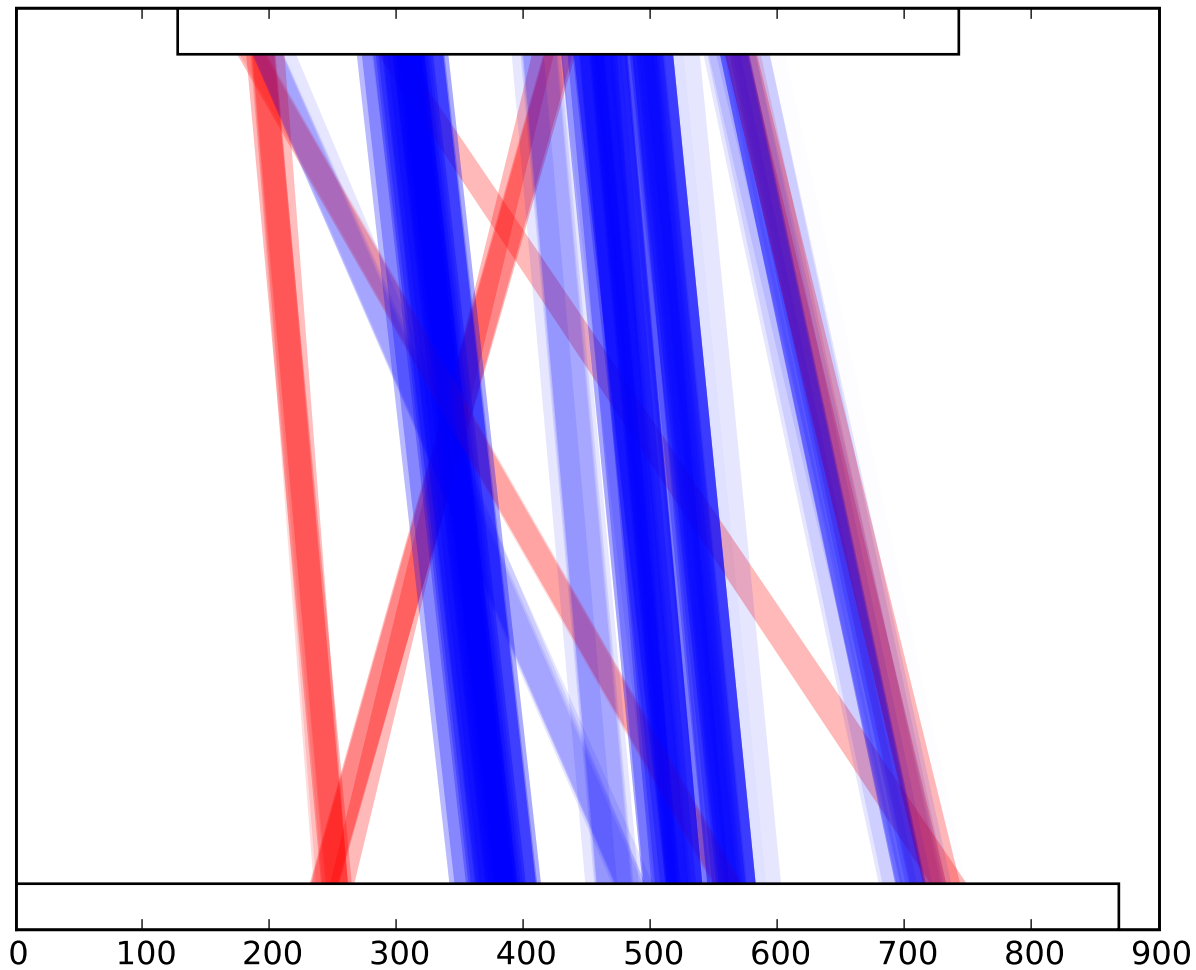

st37\_dmel\_sepsis\_cynipsea\_14-0.60-0.70.pdf

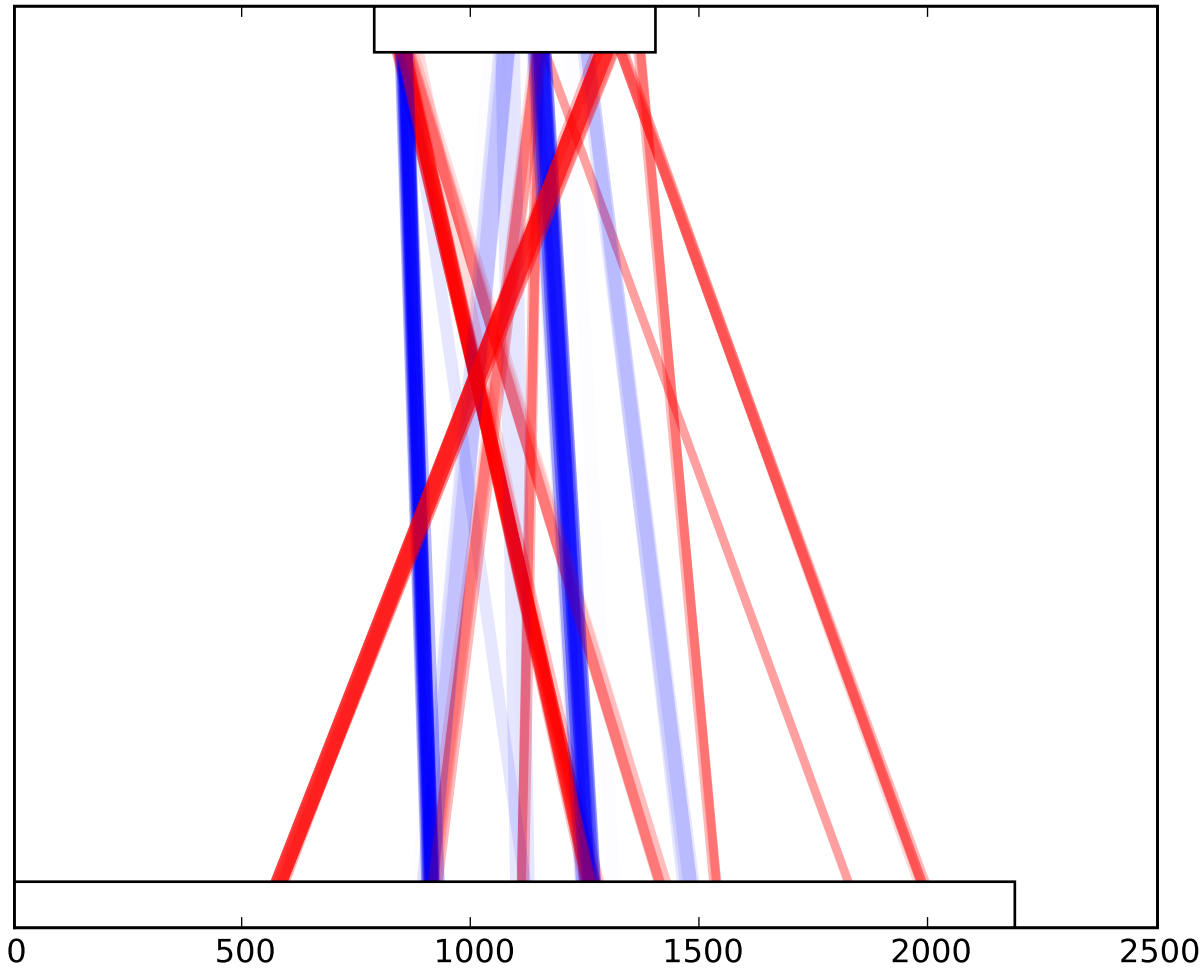

st37\_dmel\_themira\_putris\_14-0.60-0.70.pdf

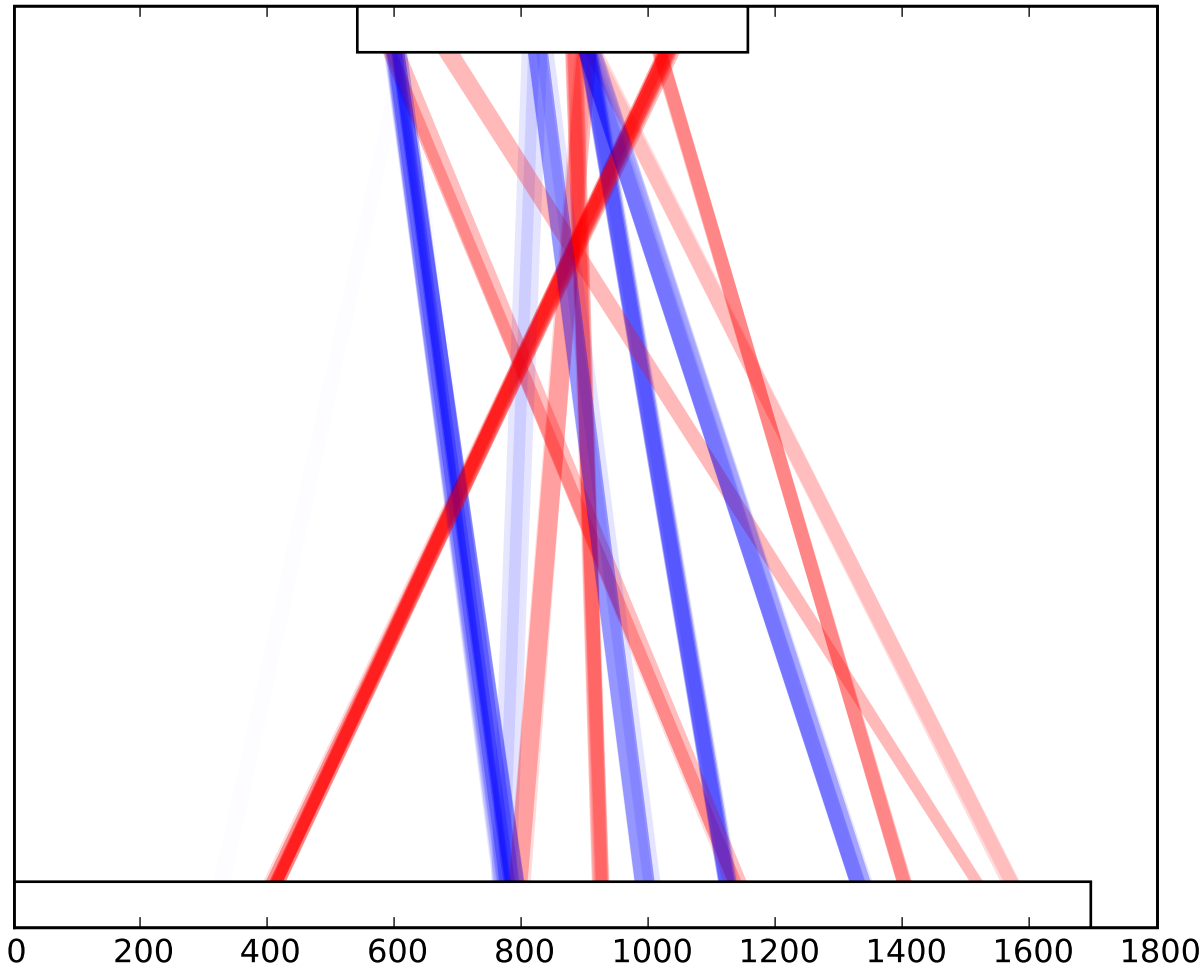



st46\_dmel\_dpse\_14-0.60-0.70.pdf

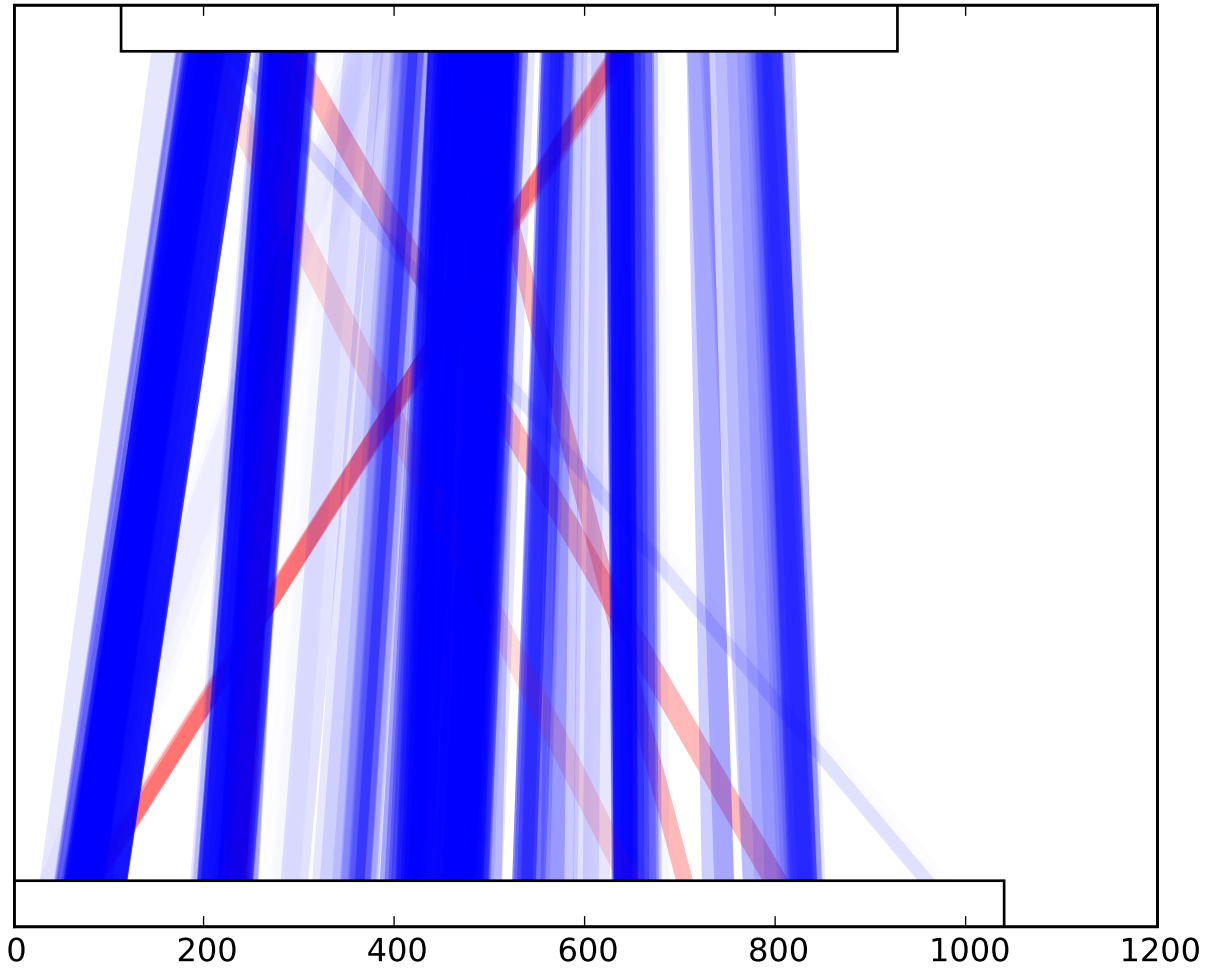

st46\_dmel\_dvir\_14-0.60-0.70.pdf

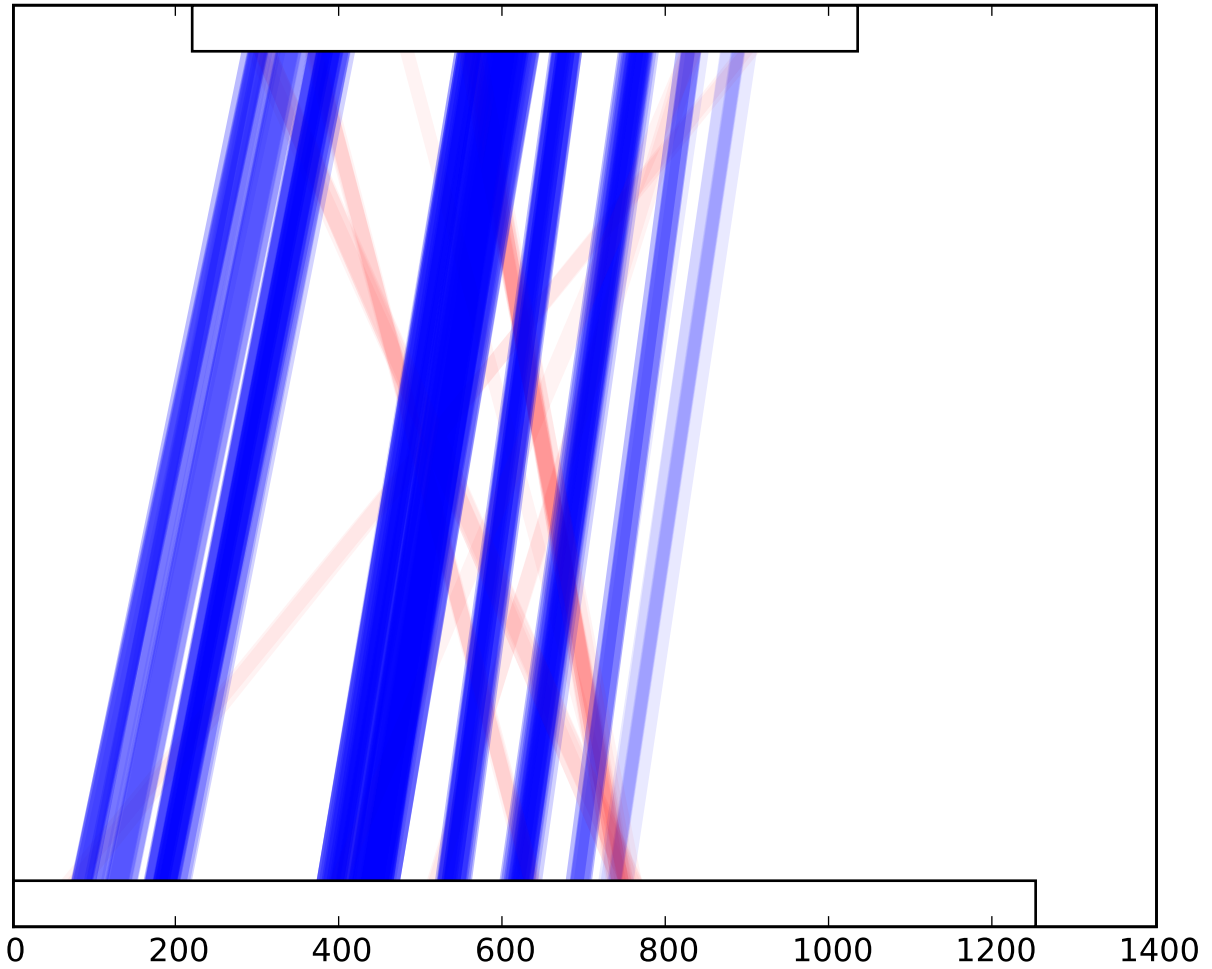

st46\_dmel\_sepsis\_cynipsea\_14-0.60-0.70.pdf

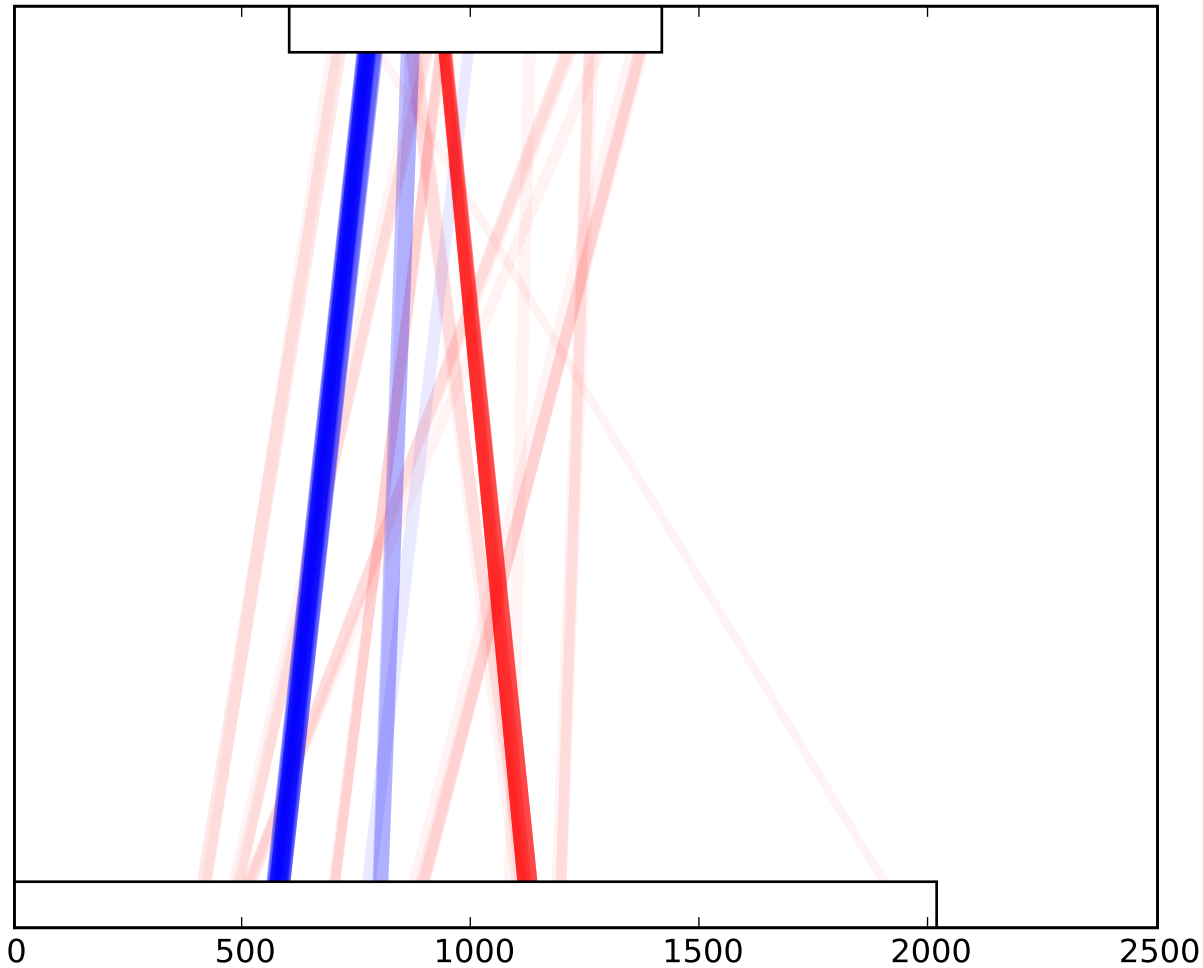

st46\_dmel\_themira\_putris\_14-0.60-0.70.pdf

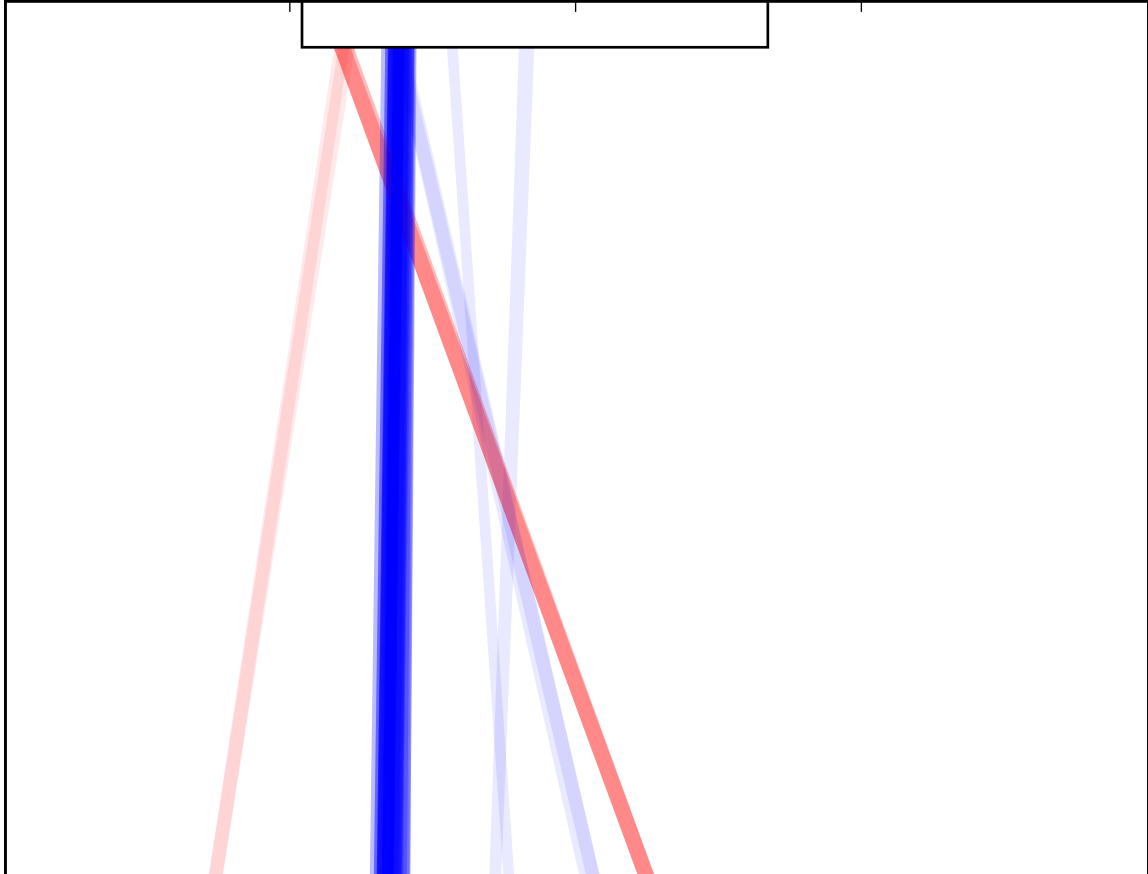

0

500

1000

1500

2000

MHE\_dmel\_dpse\_14-0.60-0.70.pdf

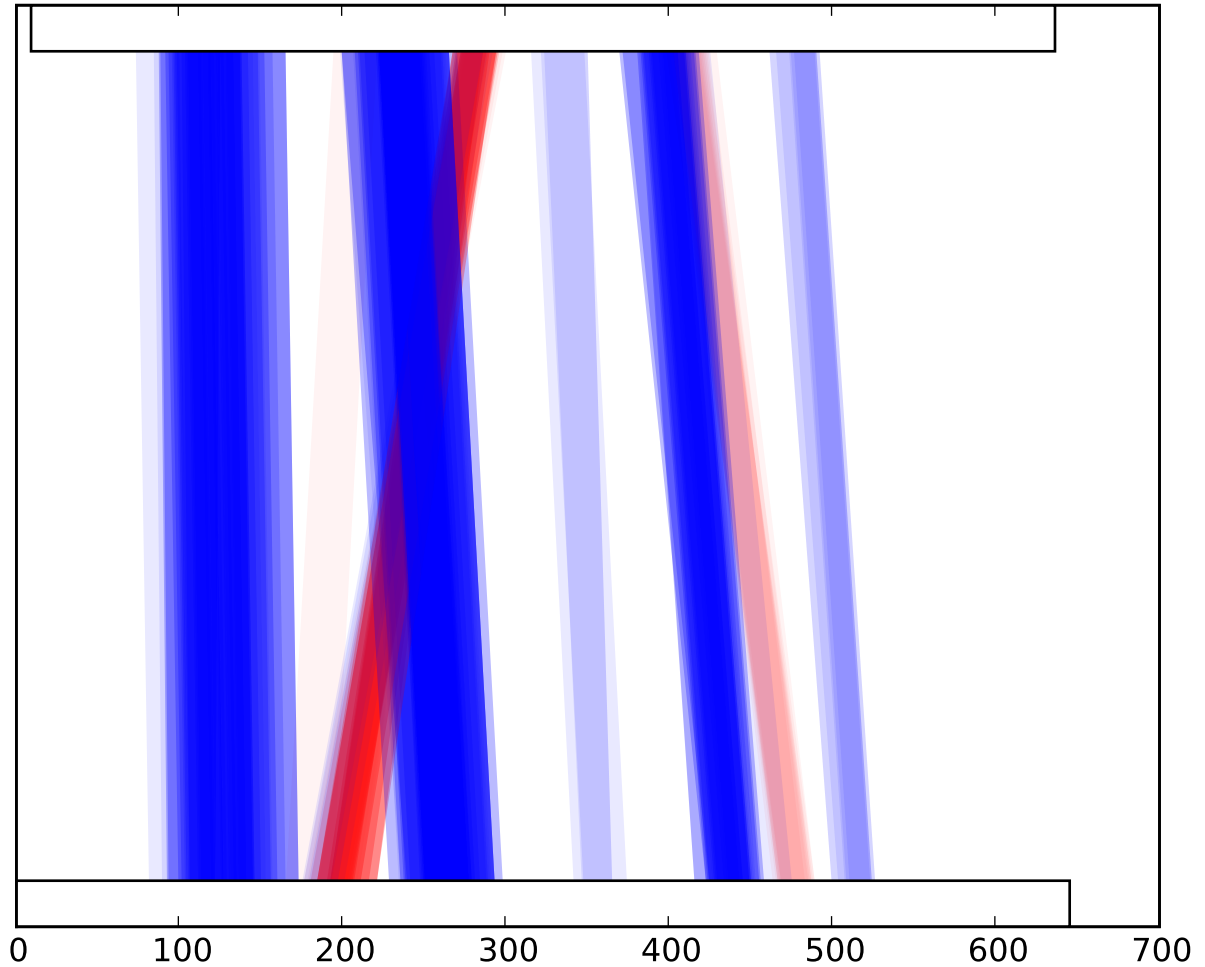

MHE\_dmel\_dvir\_14-0.60-0.70.pdf



MHE\_dmel\_sepsis\_cynipsea\_14-0.60-0.70.pdf

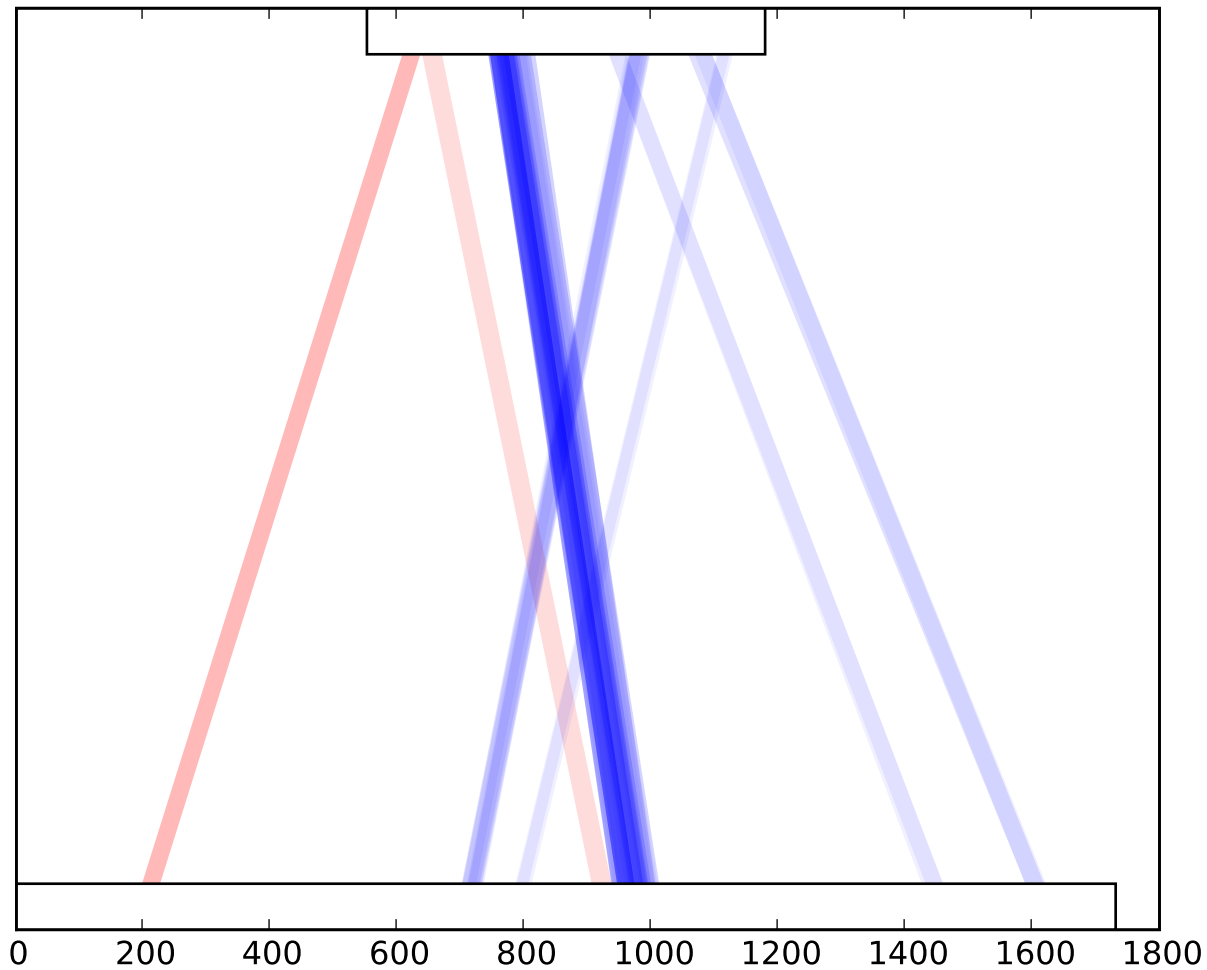

MHE\_dmel\_themira\_putris\_14-0.60-0.70.pdf

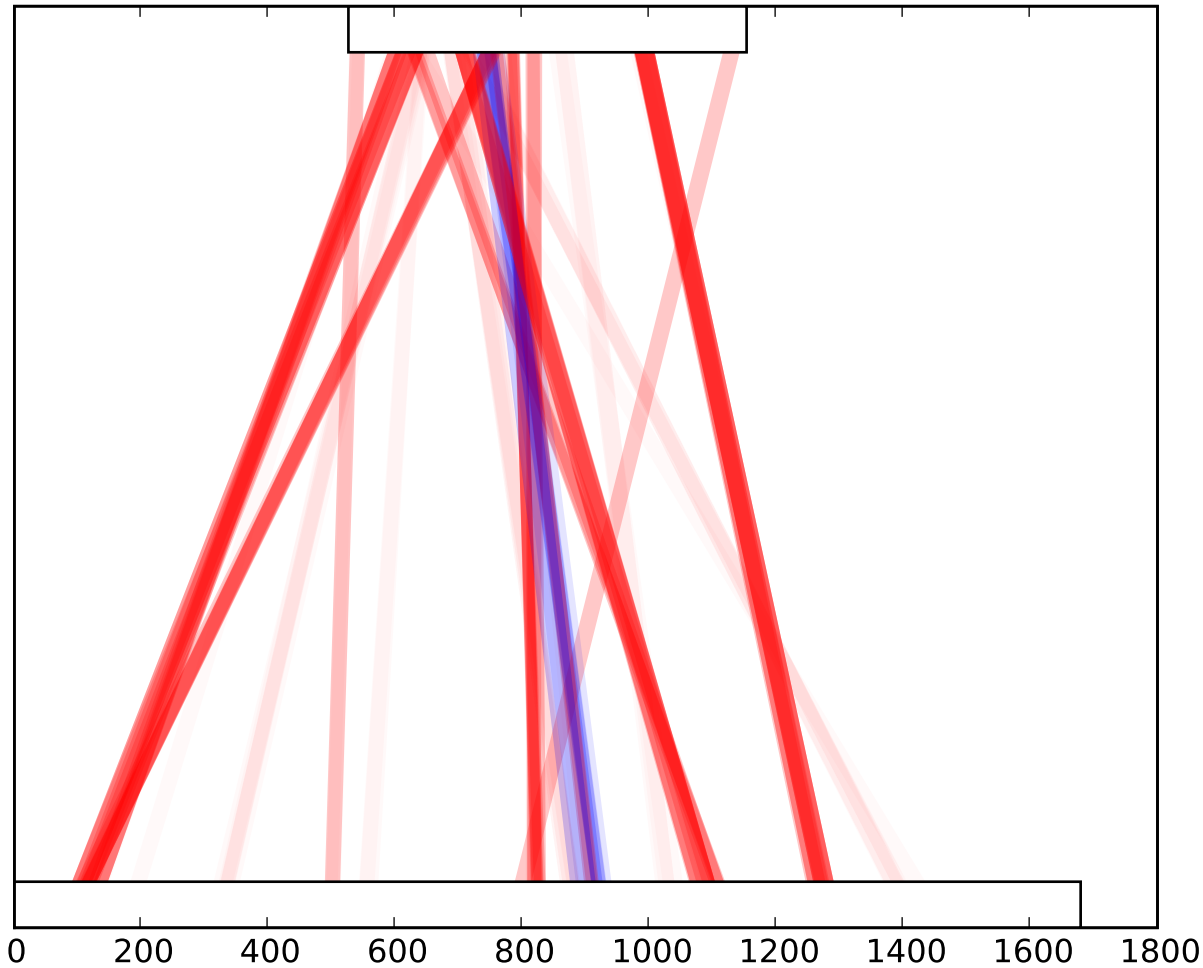

Supplement: pgen.1000268.s002.pdf [file pgen.1000268.s002.pdf]
